# Supplementary material for: Useful 1,2-dioxygenated dienes: syntheses and Diels–Alder reactions en route to substituted 2-naphthols and phenols
Source: Royal Society of Chemistry journal article supplement (doi:10.1039/d4qo01235f), 2024-01-01

# Supporting Information

## Useful 1,2-Dioxygenated Dienes: Syntheses and Diels-Alder Reactions en Route to Substituted 2-Naphthols and Phenols

Jiabin Teng,<sup>a,#</sup> Xifang Zhang,<sup>a,#</sup> Ying Song,<sup>a,#</sup> Nayu Chen,<sup>a</sup> and Yuanfei Zhang<sup>a,b\*</sup>

<sup>a</sup>*Guangxi Key Laboratory of Natural Polymer Chemistry and Physics, Nanning Normal University, Nanning 530001, China*

<sup>b</sup>*State Key Laboratory of Structural Chemistry, Fujian Institute of Research on the Structure of Matter, Chinese Academy of Sciences, Fuzhou 350002, China*

<sup>#</sup> These authors contributed equally to this work.

\*E-mail: yfzhang2015@hotmail.com

# Table of Contents

|                                                                                                                                         |          |
|-----------------------------------------------------------------------------------------------------------------------------------------|----------|
| <b>I.</b> General information                                                                                                           | S1       |
| <b>II.</b> Optimization of the reaction conditions                                                                                      | S1-S2    |
| <b>III.</b> General procedure                                                                                                           | S3       |
| <b>IV.</b> Characterization data for the dienes                                                                                         | S3-S12   |
| <b>V.</b> Tandem Diels-Alder cycloaddition/decarboxylative aromatization reactions enabled concise syntheses of substituted 2-naphthols | S12-S20  |
| <b>VI.</b> Halogenation of 2-naphthols                                                                                                  | S20-S22  |
| <b>VII.</b> Syntheses of substituted phenols                                                                                            | S22-S27  |
| <b>VIII.</b> X-ray crystallographic analysis of <b>7c</b> and <b>11j</b>                                                                | S27-S30  |
| <b>IX.</b> References                                                                                                                   | S30      |
| <b>X.</b> $^1\text{H}$ , $^{13}\text{C}$ and $^{19}\text{F}$ NMR spectra                                                                | S31-S111 |

## I. General information

All reactions were performed under Argon. The reagents used for experiments were purchased from Adamas, Aladdin, Accela, Sigma-Aldrich, Acros Organics, TCI and Alfa Aesar, and used as received unless otherwise noted. DMF, THF, CH<sub>3</sub>CN, Toluene, DMSO and 1,4-Dioxane were distilled from CaH<sub>2</sub> under Argon. <sup>1</sup>H, <sup>13</sup>C and <sup>19</sup>F NMR spectra were recorded on Bruker Avance 400 spectrometer. Chemical shifts were reported in the scale relative to TMS (0.00 ppm). Data were reported as follows: chemical shift, multiplicity (s = singlet, d = doublet, t = triplet, q = quartet, m = multiplet), coupling constants (Hz), integration. High resolution mass spectroscopy (HRMS) was recorded on a TOF MS mass spectrometer. Column chromatography was carried out on silica gel (200-300 mesh). Starting materials **1a-1d**, **1g** and **1j**, **1k-1o**, **1r** and **1s**,<sup>[1]</sup> **1e** and **1f**, **1i**, **1u-1v** and **1ae**,<sup>[2]</sup> **1h**,<sup>[3]</sup> **1p**,<sup>[4]</sup> **1q**,<sup>[5]</sup> **1t**,<sup>[6]</sup> **1w**,<sup>[7]</sup> **1x**,<sup>[8]</sup> **1y** and **1ac**,<sup>[9]</sup> **1z** and **1aa**,<sup>[10]</sup> **1ab** and **1ad**<sup>[11]</sup> were prepared according to the reported procedure.

## II. Optimization of the reaction conditions

Table S1. Screening of solvent<sup>a</sup>

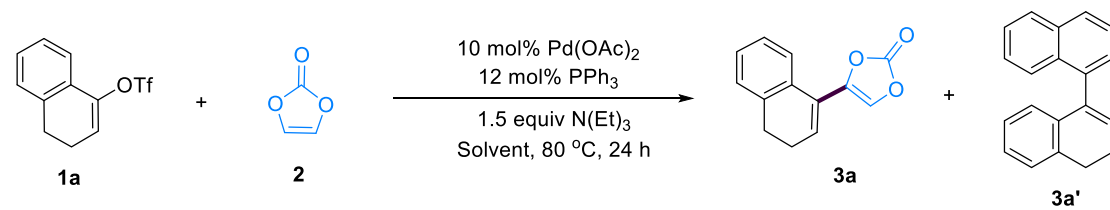

| Entry | Solvent            | Yield of <b>3a</b> (%) <sup>b</sup> | Yield of <b>3a'</b> (%) <sup>b</sup> |
|-------|--------------------|-------------------------------------|--------------------------------------|
| 1     | Toluene            | 24                                  | 32                                   |
| 2     | DMF                | 13                                  | 18                                   |
| 3     | DMSO               | 12                                  | 15                                   |
| 4     | CH <sub>3</sub> CN | 10                                  | 21                                   |
| 5     | TFE                | 0                                   | 0                                    |
| 6     | HFIP               | 0                                   | 0                                    |
| 7     | <b>DCE</b>         | <b>27</b>                           | <b>27</b>                            |
| 8     | DCM                | 14                                  | 35                                   |
| 9     | THF                | 24                                  | 27                                   |
| 10    | 1,4-Dioxane        | 26                                  | 30                                   |

<sup>a</sup> Reaction conditions: **1a** (0.2 mmol, 0.0556 g), **2** (0.6 mmol, 38  $\mu$ L), Pd(OAc)<sub>2</sub> (10 mol%, 0.0045 g), PPh<sub>3</sub> (12 mol%, 0.0063 g), N(Et)<sub>3</sub> (0.3 mmol, 42  $\mu$ L) and 2 mL of solvent, 80 °C, 24 h. <sup>b</sup>NMR yield using 1,3,5-trimethoxybenzene as the internal standard. DCE = 1,2-Dichloroethane; DMF = *N,N*-Dimethylformamide; DMSO = Dimethyl sulfoxide; TFE = 2,2,2-Trifluoroethanol; HFIP = 1,1,1,3,3,3-Hexafluoro-2-propanol; DCM = Dichloromethane; THF = Tetrahydrofuran.

**Table S2. Screening of ligand<sup>a</sup>**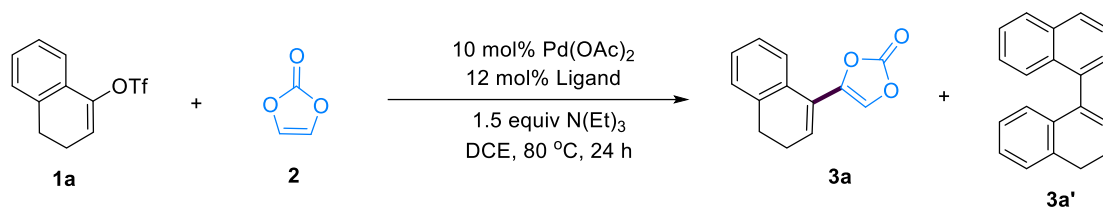

| Entry | Ligand                             | Yield of <b>3a</b> (%) <sup>b</sup> | Yield of <b>3a'</b> (%) <sup>b</sup> |
|-------|------------------------------------|-------------------------------------|--------------------------------------|
| 1     | DavePhos                           | 0                                   | 14                                   |
| 2     | Rac-BINAP                          | 0                                   | 0                                    |
| 3     | DPPF                               | 0                                   | 26                                   |
| 4     | XantPhos                           | 12                                  | 0                                    |
| 5     | PCy <sub>3</sub> ·HBF <sub>4</sub> | 72                                  | 10                                   |
| 6     | CyJohnPhos                         | 39                                  | 0                                    |
| 7     | <sup>t</sup> BuXPhos               | 13                                  | 0                                    |

  

DavePhos      CyJohnPhos      <sup>t</sup>BuXPhos      DPPF      Rac-BINAP      XantPhos

<sup>a</sup> Reaction conditions: **1a** (0.2 mmol, 0.0556 g), **2** (0.6 mmol, 38 μL), Pd(OAc)<sub>2</sub> (10 mol%, 0.0045 g), Ligand (12 mol%), N(Et)<sub>3</sub> (0.3 mmol, 42 μL) and DCE (2 mL), 80 °C, 24 h. <sup>b</sup>NMR yield using 1,3,5-trimethoxybenzene as the internal standard.

**Table S3. Screening of base<sup>a</sup>**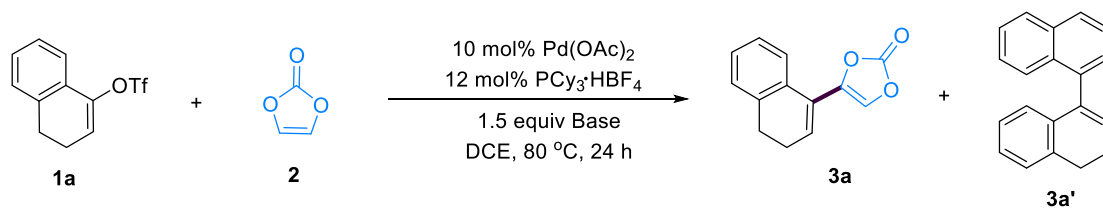

| Entry | Base                            | Yield of <b>3a</b> (%) <sup>b,c</sup> | Yield of <b>3a'</b> (%) <sup>b</sup> |
|-------|---------------------------------|---------------------------------------|--------------------------------------|
| 1     | DBU                             | 0                                     | 0                                    |
| 2     | <b>DIPEA</b>                    | <b>79(75)</b>                         | <b>12</b>                            |
| 3     | Pyridine                        | 2                                     | 0                                    |
| 4     | K <sub>2</sub> CO <sub>3</sub>  | 28                                    | 10                                   |
| 5     | Cs <sub>2</sub> CO <sub>3</sub> | 0                                     | 0                                    |
| 6     | KHCO <sub>3</sub>               | 52                                    | 7                                    |
| 7     | NaOAc                           | 35                                    | 3                                    |

<sup>a</sup> Reaction conditions: **1a** (0.2 mmol, 0.0556 g), **2** (0.6 mmol, 38 μL), Pd(OAc)<sub>2</sub> (10 mol%, 0.0045 g) PCy<sub>3</sub>·HBF<sub>4</sub> (12 mol%, 0.0088 g), Base (0.3 mmol) and DCE (2 mL), 80 °C, 24 h. <sup>b</sup>NMR yield using 1,3,5-trimethoxybenzene as the internal standard. <sup>c</sup>Isolated yield given in parentheses. DBU = 1,8-diazabicycloundecene; DIPEA = *N,N*-diisopropylethylamine.

### III. General procedure

**Condition A:** An oven dried 35 mL Schlenk tube equipped with a stir bar was fitted with a rubber septum and cooled under vacuum. After cooling, the tube was charged with Pd(OAc)<sub>2</sub> (10 mol%, 0.0045 g), PCy<sub>3</sub>·HBF<sub>4</sub> (12 mol%, 0.0088 g), vinyl triflates **1** (0.2 mmol), DIPEA (0.3 mmol, 52 μL), vinylene carbonate (0.6 mmol, 38 μL) and DCE (2 mL) under Argon, and was evacuated and refilled with Argon for three times. Then, the septum was replaced by a Teflon screwcap under Argon flow. The reaction mixture was stirred at a pre-heated 80 °C heating mantle for 24 h. Upon completion, the reaction mixture was diluted with 10 mL of ethyl acetate, filtered through a pad of silica gel, followed by washing the pad of the silica gel with the ethyl acetate (30 mL). The filtrate was concentrated under reduced pressure. The residue was then purified by chromatography on silica gel to provide the corresponding product **3**.

**Condition B:** An oven dried 35 mL Schlenk tube equipped with a stir bar was fitted with a rubber septum and cooled under vacuum. After cooling, the tube was charged with Pd(OAc)<sub>2</sub> (10 mol%, 0.0045 g), PCy<sub>3</sub>·HBF<sub>4</sub> (12 mol%, 0.0088 g), vinyl triflates **1** (0.2 mmol), DIPEA (0.3 mmol, 52 μL), vinylene carbonate (2.0 mmol, 126 μL) and DCE (2 mL) under Argon, and was evacuated and refilled with Argon for three times. Then, the septum was replaced by a Teflon screwcap under Argon flow. The reaction mixture was stirred at a pre-heated 80 °C heating mantle for 24 h. Upon completion, the reaction mixture was diluted with 10 mL of ethyl acetate, filtered through a pad of silica gel, followed by washing the pad of the silica gel with the ethyl acetate (30 mL). The filtrate was concentrated under reduced pressure. The residue was then purified by chromatography on silica gel to provide the corresponding product **3**.

**Condition C:** An oven dried 35 mL Schlenk tube equipped with a stir bar was fitted with a rubber septum and cooled under vacuum. After cooling, the tube was charged with Pd(OAc)<sub>2</sub> (10 mol%, 0.0045 g), PPh<sub>3</sub> (12 mol%, 0.0063 g), vinyl triflates **1** (0.2 mmol), DIPEA (0.3 mmol, 52 μL), vinylene carbonate (2.0 mmol, 126 μL) and DCE (2 mL) under Argon, and was evacuated and refilled with Argon for three times. Then, the septum was replaced by a Teflon screwcap under Argon flow. The reaction mixture was stirred at pre-heated 80 °C heating mantle for 24 h. Upon completion, the reaction mixture was diluted with 10 mL of ethyl acetate, filtered through a pad of silica gel, followed by washing the pad of the silica gel with the ethyl acetate (30 mL). The filtrate was concentrated under reduced pressure. The residue was then purified by chromatography on silica gel to provide the corresponding product **3**.

### IV. Characterization data for the dienes

**4-(3,4-Dihydronaphthalen-1-yl)-1,3-dioxol-2-one (3a):** The title compound was prepared according to the condition A. Yellow oil (32.1 mg, 75%; eluent: 2%-5% ethyl acetate/hexane). <sup>1</sup>H NMR (400 MHz, DMSO) δ 8.04 (s, 1H), 7.39 – 7.30 (m, 1H), 7.28 – 7.21 (m, 3H), 6.54 (t, *J* = 4.9 Hz, 1H), 2.72 (t, *J* = 7.9 Hz, 2H), 2.34 (td, *J* = 7.8, 5.1 Hz, 2H). <sup>13</sup>C NMR (101 MHz, DMSO) δ 152.76, 141.54, 136.66, 131.83, 130.18, 128.58, 128.51, 128.49, 127.20, 124.57, 124.03, 27.13, 22.86. HRMS (ESI): calcd for

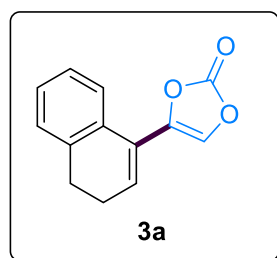

$C_{13}H_{11}O_3$   $[M + H]^+$ : 215.0708; found 215.0699.

**4-(6-Methoxy-3,4-dihydronaphthalen-1-yl)-1,3-dioxol-2-one (3b):** The title compound was

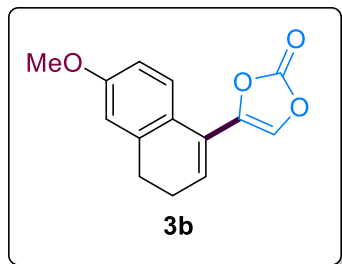

prepared according to the condition A. Yellow solid (26.2 mg, 54%; eluent: 2%-15% ethyl acetate/hexane). **m.p.** = 79-80 °C.  $^1H$  NMR (400 MHz,  $CDCl_3$ )  $\delta$  7.18 (d,  $J$  = 8.5 Hz, 1H), 7.16 (s, 1H), 6.78 (d,  $J$  = 2.6 Hz, 1H), 6.74 (dd,  $J$  = 8.5, 2.7 Hz, 1H), 6.44 (t,  $J$  = 5.0 Hz, 1H), 3.82 (s, 3H), 2.74 (t,  $J$  = 7.8 Hz, 2H), 2.36 (td,  $J$  = 7.8, 5.1 Hz, 2H).  $^{13}C$  NMR (101 MHz,  $CDCl_3$ )  $\delta$

159.33, 152.63, 142.48, 138.69, 128.89, 126.14, 124.91, 123.51, 123.06, 114.49, 111.28, 55.32, 27.87, 22.83. HRMS (ESI): calcd for  $C_{14}H_{13}O_4$   $[M + H]^+$ : 245.0814; found 245.0813.

**4-(6-Fluoro-3,4-dihydronaphthalen-1-yl)-1,3-dioxol-2-one (3c):** The title compound was

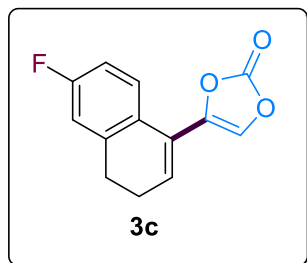

prepared according to the condition A. Yellow solid (28.8 mg, 62%; eluent: 2%-10% ethyl acetate/hexane). **m.p.** = 61-62 °C.  $^1H$  NMR (400 MHz, DMSO)  $\delta$  8.03 (s, 1H), 7.39 (dd,  $J$  = 8.6, 5.7 Hz, 1H), 7.15 (dd,  $J$  = 9.4, 2.7 Hz, 1H), 7.05 (td,  $J$  = 8.7, 2.8 Hz, 1H), 6.51 (t,  $J$  = 4.9 Hz, 1H), 2.75 (t,  $J$  = 7.9 Hz, 2H), 2.34 (td,  $J$  = 7.8, 5.2 Hz, 2H).  $^{13}C$  NMR (101 MHz, DMSO)  $\delta$  161.92 (d,  $J$  = 245.6 Hz), 152.73, 141.43, 139.86 (d,  $J$  = 8.0 Hz), 131.32, 128.65, 126.76 (d,  $J$

= 3.1 Hz), 126.63 (d,  $J$  = 8.6 Hz), 123.29, 115.56 (d,  $J$  = 21.8 Hz), 113.52 (d,  $J$  = 21.2 Hz), 27.12, 22.49.  $^{19}F$  NMR (377 MHz, DMSO)  $\delta$  -113.50. HRMS (ESI): calcd for  $C_{13}H_{10}FO_3$   $[M + H]^+$ : 233.0614; found 233.0610.

**4-(6-Chloro-3,4-dihydronaphthalen-1-yl)-1,3-dioxol-2-one (3d):** The title compound was

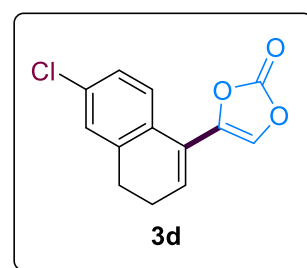

prepared according to the condition A. Yellow oil (27.4 mg, 55%; eluent: 2%-10% ethyl acetate/hexane).  $^1H$  NMR (400 MHz, DMSO)  $\delta$  8.03 (s, 1H), 7.37 (d,  $J$  = 5.8 Hz, 1H), 7.36 (s, 1H), 7.29 (dd,  $J$  = 8.3, 1.9 Hz, 1H), 6.56 (t,  $J$  = 4.9 Hz, 1H), 2.74 (t,  $J$  = 7.9 Hz, 2H), 2.35 (td,  $J$  = 7.8, 5.2 Hz, 2H).  $^{13}C$  NMR (101 MHz, DMSO)  $\delta$

152.71, 141.22, 139.17, 132.73, 132.48, 129.09, 128.69, 128.29, 126.95, 126.30, 123.24, 26.77, 22.58. HRMS (ESI): calcd for  $C_{13}H_{10}ClO_3$   $[M + H]^+$ : 249.0318; found 249.0308.

**Methyl 3-(8-(2-oxo-1,3-dioxol-4-yl)-5,6-dihydronaphthalen-2-yl)benzoate (3e):** The title

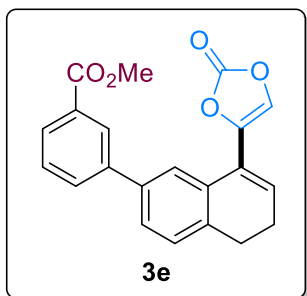

compound was prepared according to the condition B. Yellow oil (36.8 mg, 53%; eluent: 2%-10% ethyl acetate/hexane).  $^1H$  NMR (400 MHz, DMSO)  $\delta$  8.19 (t,  $J$  = 1.5 Hz, 1H), 8.14 (s, 1H), 8.01 (dd,  $J$  = 7.8, 1.6 Hz, 1H), 7.97 (dd,  $J$  = 7.8, 1.2 Hz, 1H), 7.65 (d,  $J$  = 7.8 Hz, 1H), 7.63 – 7.61 (m, 1H), 7.59 (dd,  $J$  = 7.7, 1.8 Hz, 1H), 7.41 (d,  $J$  = 7.8 Hz, 1H), 6.61 (t,  $J$  = 4.9 Hz, 1H), 3.91 (s, 3H), 2.81 (dd,  $J$  = 16.8, 9.2 Hz, 2H), 2.40 (dt,  $J$  = 12.7, 6.4 Hz, 2H).  $^{13}C$  NMR (101 MHz, DMSO)  $\delta$  166.66, 152.85, 141.42, 140.98, 138.32, 136.55,

132.42, 132.25, 130.97, 130.74, 129.84, 129.24, 128.76, 128.46, 127.67, 127.02, 124.07, 122.95, 52.70, 26.86, 22.84. HRMS (ESI): calcd for C<sub>21</sub>H<sub>17</sub>O<sub>5</sub> [M + H]<sup>+</sup>: 349.1076; found 349.1075.

**4-(8-(2-Oxo-1,3-dioxol-4-yl)-5,6-dihydronaphthalen-2-yl)benzonitrile (3f):** The title compound

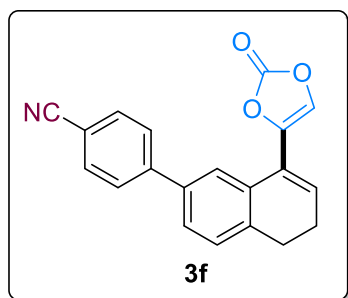

was prepared according to the condition B. Light yellow solid (25.8 mg, 41%; eluent: 2%-10% ethyl acetate/hexane). **m.p.** = 149-150 °C. <sup>1</sup>H NMR (400 MHz, DMSO) δ 8.14 (s, 1H), 7.91 (s, 4H), 7.64 (d, *J* = 3.1 Hz, 1H), 7.61 (s, 1H), 7.40 (d, *J* = 7.7 Hz, 1H), 6.60 (t, *J* = 4.8 Hz, 1H), 2.78 (t, *J* = 7.7 Hz, 2H), 2.38 (dd, *J* = 12.7, 7.5 Hz, 2H). <sup>13</sup>C NMR (101 MHz, DMSO) δ 152.85, 144.84, 141.31, 137.44, 133.16, 132.56, 131.05, 129.31, 128.80, 128.13, 127.21, 123.96, 123.08, 119.38, 110.40, 26.87, 22.79.

HRMS (ESI): calcd for C<sub>20</sub>H<sub>14</sub>NO<sub>3</sub> [M + H]<sup>+</sup>: 316.0974; found 316.0966.

**4-(2H-chromen-4-yl)-1,3-dioxol-2-one (3g):** The title compound was prepared according to the

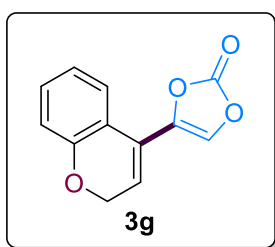

condition A. Light yellow solid (24.3 mg, 56%; eluent: 2%-10% ethyl acetate/hexane). **m.p.** = 56-57 °C. <sup>1</sup>H NMR (400 MHz, DMSO) δ 8.18 (s, 1H), 7.35 (dd, *J* = 7.7, 1.3 Hz, 1H), 7.27 (td, *J* = 7.9, 1.4 Hz, 1H), 7.00 (td, *J* = 7.6, 1.0 Hz, 1H), 6.94 (dd, *J* = 8.1, 0.8 Hz, 1H), 6.35 (t, *J* = 4.3 Hz, 1H), 4.79 (d, *J* = 4.3 Hz, 2H). <sup>13</sup>C NMR (101 MHz, DMSO) δ 154.49, 152.41, 139.59, 130.66, 129.46, 125.02, 124.36, 122.27, 120.86, 119.23, 117.03, 64.62. HRMS (ESI): calcd for C<sub>12</sub>H<sub>9</sub>O<sub>4</sub> [M +

H]<sup>+</sup>: 217.0501; found 217.0493.

**4-(6,7-Dihydrobenzo[b]thiophen-4-yl)-1,3-dioxol-2-one (3h):** The title compound was prepared

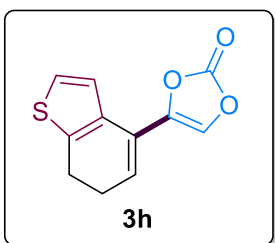

according to the condition B. Yellow oil (18.0 mg, 41%; eluent: 2%-10% ethyl acetate/hexane). <sup>1</sup>H NMR (400 MHz, DMSO) δ 8.12 (s, 1H), 7.40 (d, *J* = 5.2 Hz, 1H), 7.17 (d, *J* = 5.2 Hz, 1H), 6.29 (t, *J* = 4.9 Hz, 1H), 2.85 (t, *J* = 8.7 Hz, 2H), 2.53 – 2.49 (m, 2H). <sup>13</sup>C NMR (101 MHz, DMSO) δ 152.55, 141.33, 137.42, 129.85, 127.79, 125.39, 124.28, 123.20, 120.89, 23.85, 22.03. HRMS (ESI): calcd for C<sub>11</sub>H<sub>9</sub>O<sub>3</sub>S [M + H]<sup>+</sup>: 221.0272; found 221.0266.

**4-(7,8-Dihydroquinolin-5-yl)-1,3-dioxol-2-one (3i):** The title compound was prepared according

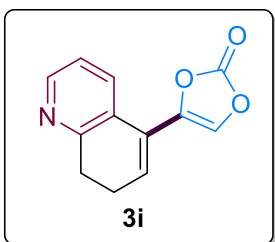

to the condition A. Brown solid (28.0 mg, 65%; eluent: 10%-30% ethyl acetate/hexane). **m.p.** = 80-81 °C. <sup>1</sup>H NMR (400 MHz, DMSO) δ 8.37 (dd, *J* = 4.8, 1.1 Hz, 1H), 8.08 (s, 1H), 7.71 (d, *J* = 7.8 Hz, 1H), 7.26 (dd, *J* = 7.8, 4.9 Hz, 1H), 6.59 (t, *J* = 4.9 Hz, 1H), 2.89 (t, *J* = 8.1 Hz, 2H), 2.50 (td, *J* = 8.0, 5.2 Hz, 2H). <sup>13</sup>C NMR (101 MHz, DMSO) δ 157.08, 152.64, 148.29, 140.81, 132.70, 131.57, 128.76, 125.64, 122.85, 122.50, 29.89, 22.80. HRMS (ESI): calcd for C<sub>12</sub>H<sub>10</sub>NO<sub>3</sub> [M +

H]<sup>+</sup>: 216.0661; found 216.0658.

**4-(3,4-Dihydronaphthalen-2-yl)-1,3-dioxol-2-one (3j):** The title compound was prepared

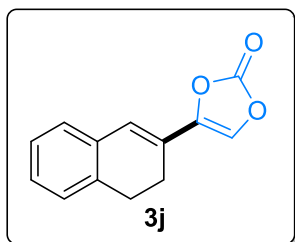

according to the condition B. Light yellow solid (22.6 mg, 53%; eluent: 2%-10% ethyl acetate/hexane). **m.p.** = 99-100 °C. <sup>1</sup>H NMR (400 MHz, DMSO) δ 8.05 (s, 1H), 7.28 – 7.23 (m, 1H), 7.20 (d, *J* = 5.9 Hz, 1H), 7.19 (s, 2H), 6.82 (s, 1H), 2.84 (t, *J* = 8.1 Hz, 2H), 2.39 (t, *J* = 8.1 Hz, 2H). <sup>13</sup>C NMR (101 MHz, DMSO) δ 152.70, 143.11, 135.37, 132.96, 128.55, 128.52, 127.97, 127.76, 127.25, 124.17, 122.52, 26.77, 21.81. HRMS (ESI): calcd for C<sub>13</sub>H<sub>11</sub>O<sub>3</sub> [*M* + *H*]<sup>+</sup>:

215.0708; found 215.0705.

**4-(Cyclohex-1-en-1-yl)-1,3-dioxol-2-one (3k):** The title compound was prepared according to the

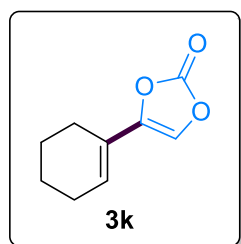

condition A. Light yellow solid (25.8 mg, 77%; eluent: 2%-5% ethyl acetate/hexane). **m.p.** = 58-59 °C. <sup>1</sup>H NMR (400 MHz, DMSO) δ 7.74 (s, 1H), 6.08 (t, *J* = 3.9 Hz, 1H), 2.19 – 2.11 (m, 2H), 2.07 – 2.01 (m, 2H), 1.68 – 1.55 (m, 4H). <sup>13</sup>C NMR (101 MHz, DMSO) δ 152.86, 143.80, 126.57, 126.11, 122.43, 24.89, 22.99, 21.85, 21.54. HRMS (ESI): calcd for C<sub>9</sub>H<sub>11</sub>O<sub>3</sub> [*M* + *H*]<sup>+</sup>: 167.0708; found 167.0699.

**Gram scale procedure:** A 250 mL round bottomed flask equipped with a stir bar was fitted with a rubber septum and cooled under vacuum. After cooling, Pd(OAc)<sub>2</sub> (10 mol%, 0.112 g), PCy<sub>3</sub>·HBF<sub>4</sub> (12 mol%, 0.221 g), **1k** (5.0 mmol, 1.15 g), DIPEA (7.5 mmol, 1.3 mL), vinylene carbonate (15.0 mmol, 0.95 mL) and DCE (50 mL) was added. After the connection of a reflux condenser, the flask was evacuated and refilled with Argon for three times and the reaction mixture was heated in a preheated 80 °C oil bath for 24 hours under Argon balloon. Up completion, the reaction mixture was diluted with ethyl acetate, filtered through a pad of silica gel, followed by washing the pad of the silica gel with the ethyl acetate. The filtrate was concentrated under reduced pressure. The residue was then purified by chromatography on silica gel to provide **3k** (658 mg, 79%).

**Ethyl 4-(2-oxo-1,3-dioxol-4-yl)cyclohex-3-ene-1-carboxylate (3l):** The title compound was

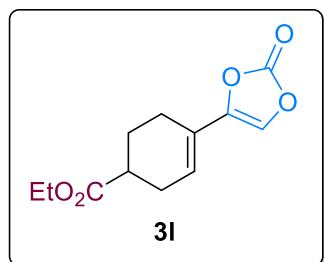

prepared according to the condition A. Light yellow solid (26.8 mg, 56%; eluent: 2%-10% ethyl acetate/hexane). **m.p.** = 78-79 °C. <sup>1</sup>H NMR (400 MHz, DMSO) δ 7.77 (s, 1H), 6.07 (d, *J* = 0.8 Hz, 1H), 4.09 (q, *J* = 7.0 Hz, 2H), 2.62 (tdd, *J* = 10.6, 5.6, 3.1 Hz, 1H), 2.48 – 2.38 (m, 1H), 2.36 – 2.25 (m, 1H), 2.14 (d, *J* = 4.8 Hz, 2H), 2.01 (ddd, *J* = 12.0, 7.6, 4.1 Hz, 1H), 1.65 (ddt, *J* = 13.1, 10.8, 7.9 Hz, 1H), 1.19 (t, *J* = 7.1 Hz, 3H). <sup>13</sup>C NMR (101 MHz, DMSO) δ

174.66, 152.77, 143.35, 126.52, 124.73, 122.06, 60.48, 38.20, 27.23, 24.15, 22.20, 14.51. HRMS (ESI): calcd for C<sub>12</sub>H<sub>15</sub>O<sub>5</sub> [*M* + *H*]<sup>+</sup>: 239.0919; found 239.0913.



**4-(4-(*Tert*-butyl)cyclohex-1-en-1-yl)-1,3-dioxol-2-one (3m):** The title compound was prepared

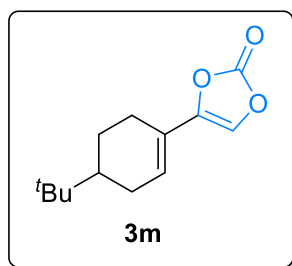

according to the condition A. Light yellow solid (35.4 mg, 80%; eluent: 2%-10% ethyl acetate/hexane). **m.p.** = 80-81 °C. <sup>1</sup>H NMR (400 MHz, CDCl<sub>3</sub>) δ 6.86 (s, 1H), 6.25 – 6.22 (m, 1H), 2.25 (dd, *J* = 14.4, 10.1 Hz, 1H), 2.15 – 2.08 (m, 2H), 2.00 – 1.94 (m, 1H), 1.93 – 1.88 (m, 1H), 1.39 – 1.31 (m, 1H), 1.31 – 1.26 (m, 1H), 0.89 (s, 9H). <sup>13</sup>C NMR (101 MHz, CDCl<sub>3</sub>) δ 152.89, 144.43, 128.30, 123.43, 121.45, 43.66, 32.25, 27.10, 26.80, 24.52, 23.01. HRMS (ESI): calcd for C<sub>13</sub>H<sub>19</sub>O<sub>3</sub> [M + H]<sup>+</sup>: 223.1334; found 223.1325.

**4-(1,2,3,6-Tetrahydro-[1,1'-biphenyl]-4-yl)-1,3-dioxol-2-one (3n):** The title compound was

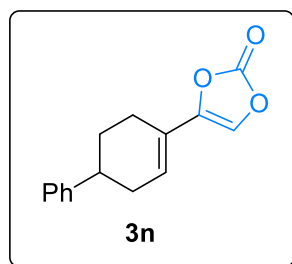

prepared according to the condition A. Light yellow solid (30.3 mg, 63% eluent: 2%-5% ethyl acetate/hexane). **m.p.** = 78-79 °C. <sup>1</sup>H NMR (400 MHz, DMSO) δ 7.79 (s, 1H), 7.34 – 7.24 (m, 4H), 7.23 – 7.18 (m, 1H), 6.24 – 6.07 (m, 1H), 2.87 – 2.72 (m, 1H), 2.49 – 2.39 (m, 1H), 2.27 (dd, *J* = 8.4, 7.2 Hz, 1H), 2.20 (dd, *J* = 23.2, 6.9 Hz, 2H), 1.98 – 1.90 (m, 1H), 1.82 – 1.71 (m, 1H). <sup>13</sup>C NMR (101 MHz, DMSO) δ 152.87, 146.34, 143.65, 128.81, 127.15, 126.62, 126.39, 126.24, 122.26, 39.25, 33.00, 28.75, 23.73. HRMS (ESI): calcd for C<sub>15</sub>H<sub>15</sub>O<sub>3</sub> [M + H]<sup>+</sup>: 243.1021; found 243.1010.

**4-(4,4-Dimethylcyclohex-1-en-1-yl)-1,3-dioxol-2-one (3o):** The title compound was prepared

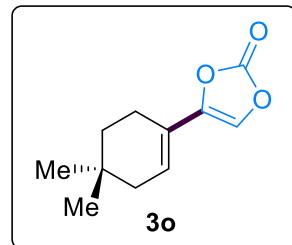

according to the condition A. Light yellow solid (18.6 mg, 48%; eluent: 2%-5% ethyl acetate/hexane). **m.p.** = 56-57 °C. <sup>1</sup>H NMR (400 MHz, DMSO) δ 7.75 (s, 1H), 6.03 (t, *J* = 4.1 Hz, 1H), 2.07 (ddd, *J* = 8.3, 4.3, 1.9 Hz, 2H), 1.99 – 1.93 (m, 2H), 1.42 (t, *J* = 6.5 Hz, 2H), 0.91 (s, 6H). <sup>13</sup>C NMR (101 MHz, DMSO) δ 152.85, 143.66, 126.15, 125.68, 121.22, 38.76, 34.20, 28.69, 28.29, 20.85. HRMS (ESI): calcd for C<sub>11</sub>H<sub>15</sub>O<sub>3</sub> [M + H]<sup>+</sup>: 195.1021; found 195.1011.

***Tert*-butyl 4-(2-oxo-1,3-dioxol-4-yl)-3,6-dihydropyridine-1(2H)-carboxylate (3p):** The title

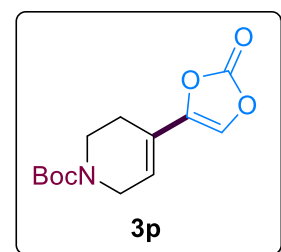

compound was prepared according to the condition A. Light yellow solid (34.3 mg, 65%; eluent: 10%-20% ethyl acetate/hexane). **m.p.** = 114-115 °C. <sup>1</sup>H NMR (400 MHz, CDCl<sub>3</sub>) δ 6.97 (s, 1H), 6.15 (s, 1H), 4.09 (d, *J* = 2.4 Hz, 2H), 3.59 (t, *J* = 5.7 Hz, 2H), 2.20 (s, 2H), 1.48 (s, 9H). <sup>13</sup>C NMR (101 MHz, CDCl<sub>3</sub>) δ 154.58, 152.37, 143.24, 124.50, 123.55, 120.51, 80.19, 43.42, 38.63, 28.40, 23.27. HRMS (ESI): calcd for C<sub>13</sub>H<sub>18</sub>NO<sub>5</sub> [M + H]<sup>+</sup>: 268.1185; found 268.1178.

**4-(3,6-Dihydro-2H-thiopyran-4-yl)-1,3-dioxol-2-one (3q):** The title compound was prepared

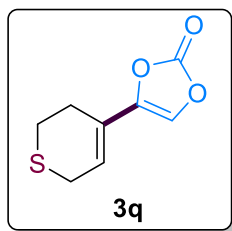

according to the condition B. Light yellow solid (22.1 mg, 60%; eluent: 2%-10% ethyl acetate/hexane). **m.p.** = 60-61 °C. <sup>1</sup>H NMR (400 MHz, DMSO) δ 7.84 (s, 1H), 6.25 (t, *J* = 4.4 Hz, 1H), 3.33 – 3.29 (m, 2H), 2.78 (t, *J* = 5.8 Hz, 2H), 2.38 – 2.28 (m, 2H). <sup>13</sup>C NMR (101 MHz, DMSO) δ 152.66, 143.56, 126.84, 123.41, 123.17, 24.88, 23.98, 23.61. HRMS (ESI): calcd for C<sub>8</sub>H<sub>9</sub>O<sub>3</sub>S [M + H]<sup>+</sup>: 185.0272; found 185.0418.

**4-(6,7-Dihydro-5H-benzo[7]annulen-9-yl)-1,3-dioxol-2-one (3r):** The title compound was

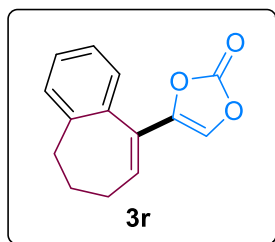

prepared according to the condition A. Yellow oil (31.6 mg, 69%; eluent: 2%-5% ethyl acetate/hexane). <sup>1</sup>H NMR (400 MHz, CDCl<sub>3</sub>) δ 7.26 – 7.15 (m, 4H), 6.73 (s, 1H), 6.57 (t, *J* = 7.6 Hz, 1H), 2.51 (t, *J* = 7.0 Hz, 2H), 2.08 (p, *J* = 7.1 Hz, 2H), 1.91 (q, *J* = 7.3 Hz, 2H). <sup>13</sup>C NMR (101 MHz, CDCl<sub>3</sub>) δ 152.69, 143.42, 141.78, 134.13, 130.69, 129.46, 128.55, 127.05, 126.44, 126.39, 125.83, 34.38, 31.73, 24.33. HRMS (ESI): calcd for C<sub>14</sub>H<sub>13</sub>O<sub>3</sub> [M + H]<sup>+</sup>: 229.0865; found

229.0856.

**4-(Cyclohept-1-en-1-yl)-1,3-dioxol-2-one (3s):** The title compound was prepared according to

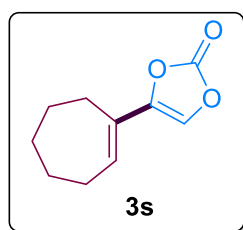

the condition A. Light yellow solid (19.3 mg, 54%; eluent: 2%-10% ethyl acetate/hexane). **m.p.** = 38-39 °C. <sup>1</sup>H NMR (400 MHz, DMSO) δ 7.86 (s, 1H), 6.25 (t, *J* = 6.8 Hz, 1H), 2.30 – 2.25 (m, 2H), 2.25 – 2.21 (m, 2H), 1.78 – 1.71 (m, 2H), 1.53 – 1.43 (m, 4H). <sup>13</sup>C NMR (101 MHz, DMSO) δ 152.95, 144.34, 131.30, 128.80, 126.57, 31.92, 28.18, 27.55, 26.44, 26.38. HRMS (ESI): calcd for C<sub>10</sub>H<sub>13</sub>O<sub>3</sub> [M + H]<sup>+</sup>: 181.0865; found 181.0855.

**Ethyl (E)-3-(2-oxo-1,3-dioxol-4-yl)but-2-enoate (3t):** The title compound was prepared

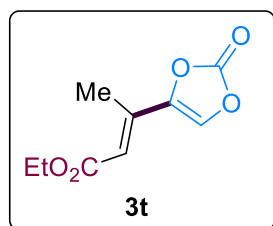

according to the condition A. Light yellow solid (9.9 mg, 25%; eluent: 2%-10% ethyl acetate/hexane). **m.p.** = 60-61 °C. <sup>1</sup>H NMR (400 MHz, DMSO) δ 8.32 (s, 1H), 5.98 (s, 1H), 4.14 (q, *J* = 7.1 Hz, 2H), 2.22 (d, *J* = 1.0 Hz, 3H), 1.23 (t, *J* = 7.1 Hz, 3H). <sup>13</sup>C NMR (101 MHz, DMSO) δ 165.57, 152.03, 143.08, 137.13, 132.82, 115.39, 60.47, 14.53, 13.18. HRMS (ESI): calcd for C<sub>9</sub>H<sub>11</sub>O<sub>5</sub> [M + H]<sup>+</sup>: 199.0606; found 199.0599.

**Tert-butyl (1R,5S)-3-(2-oxo-1,3-dioxol-4-yl)-8-azabicyclo[3.2.1]oct-2-ene-8-carboxylate (3u):**

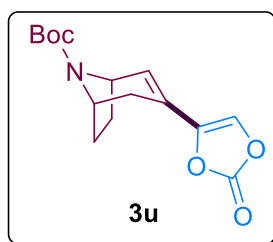

The title compound was prepared according to the condition A. Light yellow solid (33.5 mg, 57%; eluent: 10%-20% ethyl acetate/hexane). **m.p.** = 116-117 °C. <sup>1</sup>H NMR (400 MHz, CDCl<sub>3</sub>) δ 6.89 (s, 1H), 6.47 (s, 1H), 4.49 (s, 2H), 2.87 (s, 1H), 2.24 (d, *J* = 9.1 Hz, 1H), 2.08 – 1.99 (m, 1H), 1.97 – 1.90 (m, 1H), 1.81 (d, *J* = 16.4 Hz, 1H), 1.70 – 1.60 (m, 1H), 1.45 (s, 9H). <sup>13</sup>C NMR (101 MHz, CDCl<sub>3</sub>) δ 153.73, 152.33, 143.19, 131.28, 124.63, 119.23, 79.95, 53.15, 50.93, 34.21, 31.59,

29.24, 28.37. HRMS (ESI): calcd for C<sub>15</sub>H<sub>20</sub>NO<sub>5</sub> [M + H]<sup>+</sup>: 294.1341; found 294.1345.

**4-((1*R*,5*S*)-6,6-dimethylbicyclo[3.1.1]hept-2-en-2-yl)-1,3-dioxol-2-one (3v):** The title compound

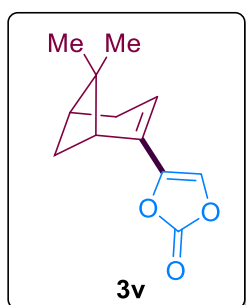

was prepared according to the condition B. Yellow oil (19.6 mg, 48%; eluent: 2%-5% ethyl acetate/hexane).  $^1\text{H NMR}$  (400 MHz, DMSO)  $\delta$  7.84 (s, 1H), 5.93 (s, 1H), 2.50 – 2.47 (m, 1H), 2.44 (dd,  $J = 6.7, 3.6$  Hz, 1H), 2.39 (t,  $J = 2.7$  Hz, 1H), 2.35 – 2.31 (m, 1H), 2.17 – 2.12 (m, 1H), 1.32 (s, 3H), 1.16 (d,  $J = 8.9$  Hz, 1H), 0.81 (s, 3H).  $^{13}\text{C NMR}$  (101 MHz, DMSO)  $\delta$  152.86, 142.58, 131.88, 126.66, 121.80, 41.07, 37.93, 31.68, 31.02, 26.17, 21.05. HRMS (ESI): calcd for  $\text{C}_{12}\text{H}_{15}\text{O}_3$   $[\text{M} + \text{H}]^+$ : 207.1021; found 207.1014.

**(*R*)-4-(3-methyl-6-(propan-2-ylidene)cyclohex-1-en-1-yl)-1,3-dioxol-2-one (3w):** The title

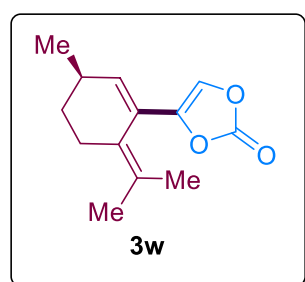

compound was prepared according to the condition A. Yellow oil (31.0 mg, 70%; eluent: 2%-10% ethyl acetate/hexane).  $^1\text{H NMR}$  (400 MHz,  $\text{CDCl}_3$ )  $\delta$  6.80 (s, 1H), 6.01 (d,  $J = 3.7$  Hz, 1H), 2.45 – 2.35 (m, 2H), 2.24 – 2.15 (m, 1H), 1.92 (dtd,  $J = 10.6, 6.3, 4.4$  Hz, 1H), 1.76 (s, 3H), 1.67 (s, 3H), 1.36 – 1.28 (m, 1H), 1.07 (d,  $J = 7.2$  Hz, 3H).  $^{13}\text{C NMR}$  (101 MHz,  $\text{CDCl}_3$ )  $\delta$  153.00, 144.72, 138.85, 129.13, 125.83, 124.96, 124.47, 31.92, 31.38, 27.19, 23.47, 21.51, 20.98. HRMS (ESI): calcd for  $\text{C}_{13}\text{H}_{17}\text{O}_3$   $[\text{M} + \text{H}]^+$ : 221.1178; found

221.1173.

**(3*S*,3*aS*,5*aS*,9*bS*)-3,5*a*,9-trimethyl-8-(2-oxo-1,3-dioxol-4-yl)-3*a*,4,5,5*a*,6,9*b*-hexahydronaphth**

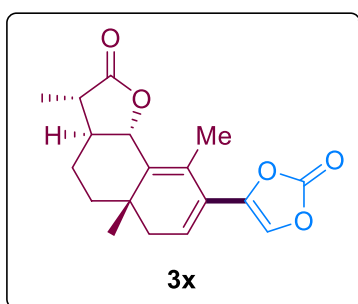

**o[1,2-*b*]furan-2(3*H*)-one (3x):** The title compound was prepared according to the condition B. Light yellow solid (35.9 mg, 57%; eluent: 5%-20% ethyl acetate/hexane). **m.p.** = 183-184 °C.  $^1\text{H NMR}$  (400 MHz,  $\text{CDCl}_3$ )  $\delta$  6.92 (s, 1H), 6.20 (dd,  $J = 6.1, 3.8$  Hz, 1H), 4.48 (d,  $J = 11.4$  Hz, 1H), 2.24 (dq,  $J = 13.8, 6.9$  Hz, 1H), 2.13 (t,  $J = 5.1$  Hz, 2H), 1.99 (d,  $J = 2.0$  Hz, 3H), 1.91 – 1.85 (m, 1H), 1.84 – 1.71 (m, 2H), 1.51 – 1.33 (m, 2H), 1.20 (d,  $J = 6.9$  Hz, 3H), 0.94 (s, 3H).  $^{13}\text{C NMR}$  (101

MHz,  $\text{CDCl}_3$ )  $\delta$  178.42, 152.61, 143.18, 134.76, 129.21, 126.33, 125.84, 122.31, 82.22, 51.53, 42.06, 40.92, 40.31, 36.60, 24.26, 22.88, 16.13, 12.41. HRMS (ESI): calcd for  $\text{C}_{18}\text{H}_{21}\text{O}_5$   $[\text{M} + \text{H}]^+$ : 317.1389; found 317.1388.

**4-((8*S*,9*S*,13*S*,14*S*)-3-methoxy-13-methyl-7,8,9,11,12,13,14,15-octahydro-6*H*-cyclopenta[*a*]ph**

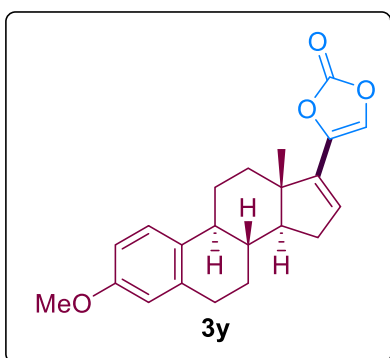

**enanthren-17-yl)-1,3-dioxol-2-one (3y):** The title compound was prepared according to the condition B. Light yellow solid (45.7 mg, 65%; eluent: 2%-10% ethyl acetate/hexane). **m.p.** = 133-134 °C.  $^1\text{H NMR}$  (400 MHz,  $\text{CDCl}_3$ )  $\delta$  7.18 (d,  $J = 8.6$  Hz, 1H), 7.00 (s, 1H), 6.72 (dd,  $J = 8.6, 2.7$  Hz, 1H), 6.65 (d,  $J = 2.6$  Hz, 1H), 6.21 – 6.16 (m, 1H), 3.78 (s, 3H), 2.99 – 2.82 (m, 2H), 2.41 (ddd,  $J = 16.3, 6.3, 3.5$  Hz, 2H), 2.31 (td,  $J = 11.0, 4.6$  Hz, 1H), 2.12 (dd,  $J = 16.3, 11.5$  Hz, 1H), 1.98 – 1.89 (m, 2H), 1.74 (ddd,  $J =$

17.6, 9.0, 4.3 Hz, 2H), 1.69 – 1.58 (m, 2H), 1.46 (ddd,  $J = 23.8, 11.6, 7.0$  Hz, 1H), 0.95 (s, 3H).  $^{13}\text{C}$  NMR (101 MHz,  $\text{CDCl}_3$ )  $\delta$  157.63, 152.56, 140.85, 138.52, 137.80, 132.21, 131.04, 125.98, 124.22, 113.92, 111.57, 56.03, 55.23, 46.68, 44.06, 36.94, 35.04, 31.66, 29.61, 27.64, 26.44, 16.50. HRMS (ESI): calcd for  $\text{C}_{22}\text{H}_{25}\text{O}_4$   $[\text{M} + \text{H}]^+$ : 353.1753; found 353.1742.

**(3R,5S,8R,9S,10S,13S,14S)-10,13-dimethyl-17-(2-oxo-1,3-dioxol-4-yl)-2,3,4,5,6,7,8,9,10,11,12,**

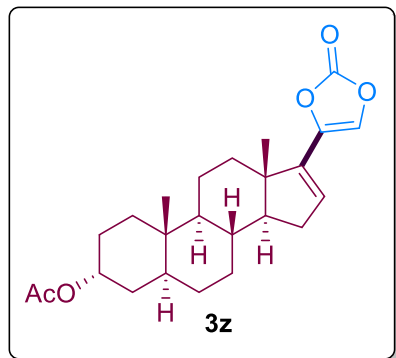

**13,14,15-tetradecahydro-1H-cyclopenta[a]phenanthren-3-yl acetate (3z):** The title compound was prepared according to the condition B. White solid (55.9 mg, 70%; eluent: 2%-20% ethyl acetate/hexane). **m.p.** = 141-142 °C.  $^1\text{H}$  NMR (400 MHz,  $\text{CDCl}_3$ )  $\delta$  6.97 (s, 1H), 6.14 (s, 1H), 5.02 (s, 1H), 2.30 (ddd,  $J = 16.5, 6.3, 3.4$  Hz, 1H), 2.05 (s, 3H), 2.00 (dd,  $J = 13.1, 8.4$  Hz, 1H), 1.82 (dd,  $J = 9.2, 6.8$  Hz, 1H), 1.76 – 1.60 (m, 5H), 1.59 – 1.44 (m, 7H), 1.40 (dd,  $J = 12.9, 4.1$  Hz, 1H), 1.30 – 1.21 (m, 3H), 1.10 – 0.97 (m, 1H), 0.92 (s, 3H),

0.84 (s, 3H).  $^{13}\text{C}$  NMR (101 MHz,  $\text{CDCl}_3$ )  $\delta$  170.70, 152.57, 140.87, 138.40, 131.10, 124.13, 69.95, 56.79, 54.40, 46.44, 40.12, 35.97, 35.02, 33.61, 32.82, 32.66, 31.82, 31.61, 28.13, 26.04, 21.56, 20.64, 16.45, 11.31. HRMS (ESI): calcd for  $\text{C}_{24}\text{H}_{33}\text{O}_5$   $[\text{M} + \text{H}]^+$ : 401.2328; found 401.2317.

**(3S,5S,8R,9S,10S,13S,14S)-10,13-dimethyl-17-(2-oxo-1,3-dioxol-4-yl)-2,3,4,5,6,7,8,9,10,11,12,1**

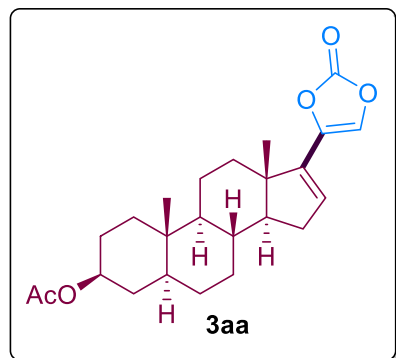

**3,14,15-tetradecahydro-1H-cyclopenta[a]phenanthren-3-yl acetate (3aa):** The title compound was prepared according to the condition B. White solid (48.4 mg, 60%; eluent: 2%-20% ethyl acetate/hexane). **m.p.** = 125-126 °C.  $^1\text{H}$  NMR (400 MHz,  $\text{CDCl}_3$ )  $\delta$  6.96 (s, 1H), 6.16 – 6.10 (m, 1H), 4.75 – 4.63 (m, 1H), 2.29 (ddd,  $J = 16.5, 6.4, 3.5$  Hz, 1H), 2.02 (s, 3H), 2.01 – 1.95 (m, 1H), 1.83 – 1.80 (m, 1H), 1.75 – 1.58 (m, 5H), 1.57 – 1.30 (m, 7H), 1.29 – 1.15 (m, 2H), 1.08 – 0.95 (m, 2H), 0.91 (s, 3H), 0.86 (s, 3H), 0.78 (ddd,  $J = 11.4, 10.3, 4.4$  Hz, 1H).  $^{13}\text{C}$  NMR (101 MHz,

$\text{CDCl}_3$ )  $\delta$  170.65, 152.54, 140.86, 138.39, 131.10, 124.11, 73.50, 56.65, 54.45, 46.45, 44.78, 36.52, 35.66, 34.99, 33.95, 33.65, 31.83, 31.65, 28.34, 27.40, 21.43, 21.03, 16.44, 12.17. HRMS (ESI): calcd for  $\text{C}_{24}\text{H}_{32}\text{NaO}_5$   $[\text{M} + \text{Na}]^+$ : 423.2147; found 423.2138.

**(8R,9S,10R,13S,14S,17S)-10,13-dimethyl-3-(2-oxo-1,3-dioxol-4-yl)-2,7,8,9,10,11,12,13,14,15,1**

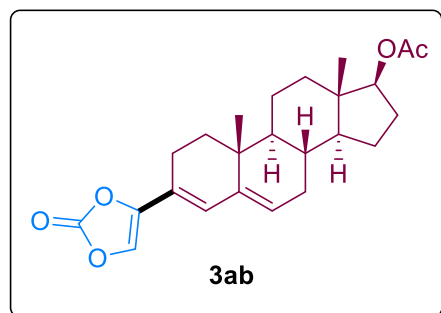

**6,17-dodecahydro-1H-cyclopenta[a]phenanthren-17-yl acetate (3ab):** The title compound was prepared according to the condition B. Yellow solid (45.9 mg, 58%; eluent: 2%-20% ethyl -acetate/hexane). **m.p.** = 164-165 °C.  $^1\text{H}$  NMR (400 MHz,  $\text{CDCl}_3$ )  $\delta$  6.94 (s, 1H), 6.38 (s, 1H), 5.70 – 5.66 (m, 1H), 4.62 (dd,  $J = 8.9, 8.1$  Hz, 1H), 2.33 – 2.17 (m, 3H), 2.15 – 2.10 (m, 1H), 2.05 (s, 3H), 1.95 – 1.88 (m, 1H), 1.84 – 1.75 (m, 2H), 1.70

– 1.60 (m, 2H), 1.59 – 1.31 (m, 4H), 1.25 (td,  $J = 12.3, 4.9$  Hz, 2H), 1.15 – 1.04 (m, 2H), 0.97 (s, 3H), 0.84 (s, 3H).  $^{13}\text{C}$  NMR (101 MHz,  $\text{CDCl}_3$ )  $\delta$  171.19, 152.69, 144.37, 140.37, 128.76, 127.82, 124.24, 117.54, 82.61, 51.18, 48.02, 42.53, 36.68, 35.01, 32.77, 31.67, 31.48, 27.50, 23.45, 21.16, 20.58, 20.54, 19.13, 12.04. HRMS (ESI): calcd for  $\text{C}_{24}\text{H}_{31}\text{O}_5$   $[\text{M} + \text{H}]^+$ : 399.2171; found 399.2160.

**4-((8*S*,9*S*,10*R*,13*R*,14*S*,17*R*)-10,13-dimethyl-17-((*R*)-6-methylheptan-2-yl)-2,7,8,9,10,11,12,13,14,15,16,17-dodecahydro-1*H*-cyclopenta[*a*]phenanthren-3-yl)-1,3-dioxol-2-one (3ac):** The title

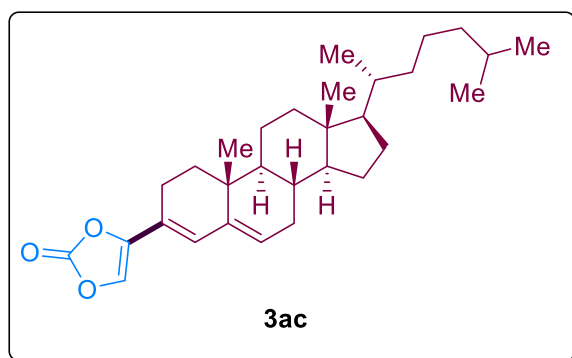

compound was prepared according to the condition B. Yellow solid (47.9 mg, 53%; eluent: 2%-5% ethyl acetate/hexane). **m.p.** = 108-109 °C.  $^1\text{H}$  NMR (400 MHz,  $\text{CDCl}_3$ )  $\delta$  6.84 (s, 1H), 6.30 (s, 1H), 5.61 (s, 1H), 2.18 (dt,  $J = 18.6, 4.8$  Hz, 2H), 2.05 – 1.93 (m, 2H), 1.88 – 1.74 (m, 2H), 1.72 – 0.93 (m, 20H), 0.88 (s, 3H), 0.85 (d,  $J = 6.5$  Hz, 3H), 0.80 (d,  $J = 1.5$  Hz, 3H), 0.79 (d,  $J = 1.5$  Hz,

3H), 0.63 (s, 3H).  $^{13}\text{C}$  NMR (101 MHz,  $\text{CDCl}_3$ )  $\delta$  152.74, 144.46, 140.33, 129.42, 128.00, 124.12, 117.35, 56.82, 56.17, 48.06, 42.46, 39.69, 39.52, 36.20, 35.82, 34.97, 32.78, 32.18, 31.65, 28.23, 28.03, 24.16, 23.89, 22.84, 22.59, 21.05, 20.62, 19.13, 18.73, 11.99. HRMS (ESI): calcd for  $\text{C}_{30}\text{H}_{45}\text{O}_3$   $[\text{M} + \text{H}]^+$ : 453.3369; found 453.3357.

**4-((8*S*,9*S*,10*R*,13*S*,14*S*,17*S*)-17-acetyl-10,13-dimethyl-2,7,8,9,10,11,12,13,14,15,16,17-dodecahydro-1*H*-cyclopenta[*a*]phenanthren-3-yl)-1,3-dioxol-2-one (3ad):** The title

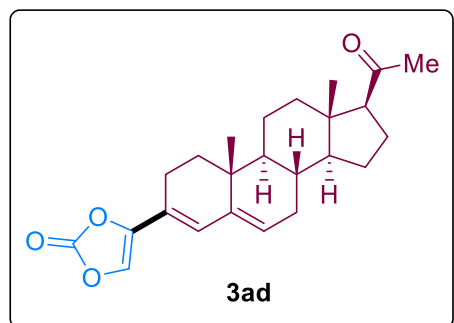

compound was prepared according to the condition B. Light yellow solid (58.2 mg, 76%; eluent: 2%-20% ethyl acetate/hexane). **m.p.** = 180-181 °C.  $^1\text{H}$  NMR (400 MHz,  $\text{CDCl}_3$ )  $\delta$  6.97 (s, 1H), 6.37 (s, 1H), 5.68 (d,  $J = 4.0$  Hz, 1H), 2.56 (t,  $J = 8.9$  Hz, 1H), 2.35 – 2.17 (m, 4H), 2.14 (s, 3H), 2.11 – 2.06 (m, 1H), 1.93 (dd,  $J = 12.7, 4.2$  Hz, 1H), 1.73 – 1.64 (m, 4H), 1.54 – 1.42 (m, 2H), 1.33 – 1.18 (m, 4H),

1.14 – 1.04 (m, 1H), 0.96 (s, 3H), 0.66 (s, 3H).  $^{13}\text{C}$  NMR (101 MHz,  $\text{CDCl}_3$ )  $\delta$  209.41, 152.67, 144.33, 140.27, 128.87, 127.75, 124.31, 117.54, 63.55, 56.89, 47.89, 44.02, 38.67, 34.96, 32.75, 31.98, 31.60, 31.53, 24.34, 22.82, 21.01, 20.56, 19.10, 13.32. HRMS (ESI): calcd for  $\text{C}_{24}\text{H}_{31}\text{O}_4$   $[\text{M} + \text{H}]^+$ : 383.2222; found 383.2216.

## Methyl

### (4a*S*,6a*S*,6b*R*,8a*R*,12a*S*,12b*R*,14b*S*)-2,2,6a,6b,9,9,12a-heptamethyl-10-(2-oxo-1,3-dioxol-4-yl)

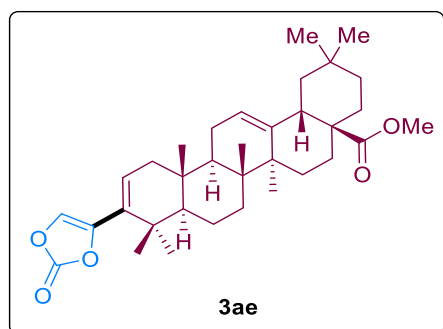

**-1,3,4,5,6,6a,6b,7,8,8a,9,12,12a,12b,13,14b-hexadecahydronicene-4a(2*H*)-carboxylate (3ae):** The title compound was prepared according to the condition C. White solid (39.6 mg, 37%; eluent: 2%-20% ethyl acetate/hexane). **m.p.** = 199-200 °C. <sup>1</sup>H NMR (400 MHz, CDCl<sub>3</sub>) δ 6.86 (s, 1H), 6.04 (d, *J* = 4.7 Hz, 1H), 5.26 (s, 1H), 3.56 (s, 3H), 2.81 (dd, *J* = 13.7, 3.6 Hz, 1H), 2.10 (dd, *J* = 18.2, 6.6 Hz, 1H), 1.97 – 1.86 (m, 2H), 1.84 – 1.75 (m, 1H), 1.70 – 1.18 (m, 16H), 1.07 (s, 6H), 0.99 (s,

3H), 0.86 (s, 6H), 0.83 (s, 3H), 0.71 (s, 3H). <sup>13</sup>C NMR (101 MHz, CDCl<sub>3</sub>) δ 178.28, 152.69, 144.15, 143.74, 130.87, 128.74, 125.26, 122.24, 53.23, 51.58, 46.81, 46.25, 45.85, 41.80, 41.46, 41.29, 39.24, 35.74, 35.59, 33.88, 33.12, 32.35, 32.10, 30.72, 29.75, 27.65, 25.73, 23.62, 23.21, 23.10, 21.05, 19.44, 16.52, 15.72. HRMS (ESI): calcd for C<sub>34</sub>H<sub>49</sub>O<sub>5</sub> [M + H]<sup>+</sup>: 537.3580; found 537.3579.

## V. Tandem Diels-Alder cycloaddition/decarboxylative aromatization reactions enabled concise syntheses of substituted 2-naphthols

### Step 1

**Condition A:** An oven dried 35 mL Schlenk tube equipped with a stir bar was fitted with a rubber septum and cooled under vacuum. After cooling, the tube was charged with **3** (0.2 mmol), benzoquinone (0.8 mmol, 86.4 mg) and acetic acid (2 mL) under Argon, and was evacuated and refilled with Argon for three times. Then, the septum was replaced by a Teflon screwcap under Argon flow. The reaction mixture was stirred at pre-heated 80 °C heating mantle for 48 h. Upon completion, saturated aqueous sodium bicarbonate solution was added to neutralize the acid. The aqueous mixture was extracted with ethyl acetate (25 mL) for three times. The combined organic layer was dried over anhydrous sodium sulfate, filtered, and the filtrate was concentrated under reduced pressure. The residue was then purified by silica gel chromatography to obtain the corresponding product **5**.

**Condition B:** An oven dried 35 mL Schlenk tube equipped with a stir bar was fitted with a rubber septum and cooled under vacuum. After cooling, the tube was charged with **3** (0.2 mmol), benzoquinone (0.8 mmol, 86.4 mg) and *tert*-butanol (2 mL) under Argon, and was evacuated and refilled with Argon for three times. Then, the septum was replaced by a Teflon screwcap under Argon flow. The reaction mixture was stirred at pre-heated 80 °C heating mantle for 24 h. Upon completion, the reaction mixture was diluted with 10 mL of ethyl acetate, filtered through a pad of silica gel, followed by washing the pad of the silica gel with the ethyl acetate (30 mL). The filtrate was concentrated under reduced pressure. The residue was then purified by chromatography on silica gel to provide the corresponding product **5**.

**9-Hydroxy-5,6,7,8-tetrahydrophenanthrene-1,4-dione (5a):** The title compound was prepared

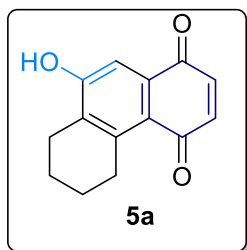

according to the condition A. Yellow solid (41.2 mg, 90%; eluent: 10%-30% ethyl acetate/hexane). **m.p.** = 235-236 °C. <sup>1</sup>H NMR (400 MHz, DMSO) δ 10.85 (s, 1H), 7.27 (s, 1H), 6.83 (q, *J* = 10.2 Hz, 2H), 3.09 (s, 2H), 2.62 (s, 2H), 1.70 (s, 4H). <sup>13</sup>C NMR (101 MHz, DMSO) δ 186.12, 185.75, 159.94, 143.07, 141.54, 135.99, 132.87, 131.41, 121.64, 109.69, 29.11, 24.39, 22.63, 21.37. HRMS (ESI): calcd for C<sub>14</sub>H<sub>11</sub>O<sub>3</sub> [*M* - *H*]<sup>-</sup>: 227.0714; found 227.0712.

**6-(*Tert*-butyl)-9-hydroxy-5,6,7,8-tetrahydrophenanthrene-1,4-dione (5b):** The title compound

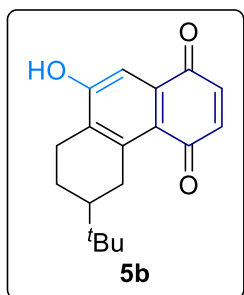

was prepared according to the condition A. Yellow solid (30.1 mg, 53%; eluent: 10%-30% ethyl acetate/hexane). **m.p.** = 230-231 °C. <sup>1</sup>H NMR (400 MHz, DMSO) δ 10.79 (s, 1H), 7.23 (s, 1H), 6.77 (dd, *J* = 28.7, 10.2 Hz, 2H), 3.36 – 3.28 (m, 1H), 2.87 (dd, *J* = 17.9, 3.5 Hz, 1H), 2.61 – 2.52 (m, 1H), 2.35 (ddd, *J* = 17.8, 12.4, 5.5 Hz, 1H), 1.98 – 1.90 (m, 1H), 1.26 – 1.16 (m, 1H), 1.15 – 1.06 (m, 1H), 0.95 (s, 9H). <sup>13</sup>C NMR (101 MHz, DMSO) δ 186.02, 185.64, 159.68, 143.62, 141.44, 135.79, 133.03, 131.22, 121.65, 109.66, 43.89, 32.59, 30.72, 27.48, 25.47, 22.72.

HRMS (ESI): calcd for C<sub>18</sub>H<sub>19</sub>O<sub>3</sub> [*M* - *H*]<sup>-</sup>: 283.1340; found 283.1346.

**9-Hydroxy-6,6-dimethyl-5,6,7,8-tetrahydrophenanthrene-1,4-dione (5c):** The title compound

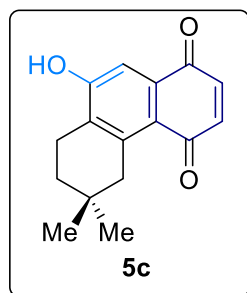

was prepared according to the condition A. Yellow solid (43.8 mg, 86%; eluent: 10%-30% ethyl acetate/hexane). **m.p.** = 225-226 °C. <sup>1</sup>H NMR (400 MHz, DMSO) δ 10.89 (s, 1H), 7.29 (s, 1H), 6.82 (q, *J* = 10.2 Hz, 2H), 2.90 (s, 2H), 2.63 (t, *J* = 6.7 Hz, 2H), 1.49 (t, *J* = 6.8 Hz, 2H), 0.93 (s, 6H). <sup>13</sup>C NMR (101 MHz, DMSO) δ 186.23, 185.75, 159.90, 142.24, 141.60, 136.01, 133.26, 130.14, 121.94, 109.68, 42.43, 33.61, 28.69, 28.48, 21.75. HRMS (ESI): calcd for C<sub>16</sub>H<sub>15</sub>O<sub>3</sub> [*M* - *H*]<sup>-</sup>: 255.1027; found 255.1027.

**6-Hydroxy-8,9,10,11-tetrahydro-1*H*-cyclohepta[*a*]naphthalene-1,4(7*H*)-dione (5d):** The title

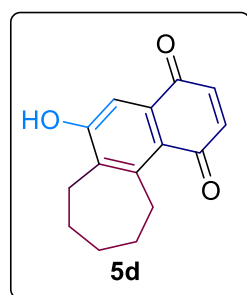

compound was prepared according to the condition A. Yellow solid (23.3 mg, 48%; eluent: 10%-30% ethyl acetate/hexane). **m.p.** = 213-214 °C. <sup>1</sup>H NMR (400 MHz, DMSO) δ 10.78 (s, 1H), 7.34 (s, 1H), 6.85 (s, 2H), 3.41 – 3.38 (m, 2H), 2.95 – 2.87 (m, 2H), 1.76 (dd, *J* = 11.4, 5.9 Hz, 2H), 1.58 (d, *J* = 3.9 Hz, 2H), 1.55 – 1.46 (m, 2H). <sup>13</sup>C NMR (101 MHz, DMSO) δ 186.90, 185.53, 158.54, 149.55, 141.94, 137.82, 136.16, 132.83, 121.89, 111.33, 31.51, 28.51, 26.86, 26.50, 24.70. HRMS (ESI): calcd for C<sub>15</sub>H<sub>13</sub>O<sub>3</sub> [*M* - *H*]<sup>-</sup>: 241.0871; found 241.0870.

**11-Hydroxy-1*H*-naphtho[1,2-*c*]chromene-1,4(5*H*)-dione (5e):** The title compound was prepared

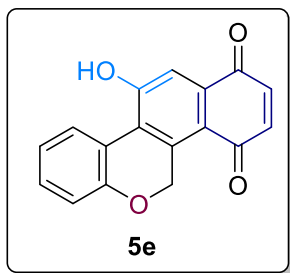

according to the condition B. Red solid (28.4 mg, 51%; eluent: 10%-30% ethyl acetate/hexane). **m.p.** >300 °C. <sup>1</sup>H NMR (400 MHz, DMSO) δ 11.65 (s, 1H), 8.37 (dd, *J* = 8.0, 1.4 Hz, 1H), 7.50 (s, 1H), 7.30 (td, *J* = 8.0, 1.5 Hz, 1H), 7.10 – 7.05 (m, 1H), 7.00 (dd, *J* = 8.0, 0.9 Hz, 1H), 6.94 – 6.87 (m, 2H), 5.46 (s, 2H). <sup>13</sup>C NMR (101 MHz, DMSO) δ 185.89, 184.74, 158.90, 155.03, 141.07, 139.03, 137.11, 133.24, 130.43, 129.32, 122.16, 122.11, 120.92, 120.32, 116.90, 113.68, 65.87. HRMS (ESI): calcd for C<sub>17</sub>H<sub>9</sub>O<sub>4</sub> [M - H]<sup>-</sup>: 277.0507; found 277.0505.

**11-Hydroxy-8-methoxy-5,6-dihydrochrysen-1,4-dione (5f):** The title compound was prepared

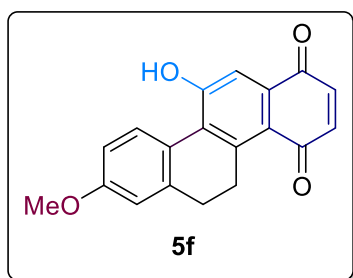

according to the condition B. Red solid (22.8 mg, 37%; eluent: 10%-30% ethyl acetate/hexane) **m.p.** = 192-193 °C. <sup>1</sup>H NMR (400 MHz, DMSO) δ 11.18 (s, 1H), 8.23 (d, *J* = 8.7 Hz, 1H), 7.50 (s, 1H), 6.91 – 6.87 (m, 3H), 6.85 (dd, *J* = 8.7, 2.8 Hz, 1H), 3.80 (s, 3H), 3.31 – 3.24 (m, 2H), 2.70 – 2.62 (m, 2H). <sup>13</sup>C NMR (101 MHz, DMSO) δ 186.40, 185.12, 159.28, 158.47, 144.31, 141.93, 140.74, 136.54, 132.63, 130.72, 127.75, 123.82, 121.97, 113.03, 112.62, 111.97, 55.54, 28.79,

26.24. HRMS (ESI): calcd for C<sub>19</sub>H<sub>13</sub>O<sub>4</sub> [M - H]<sup>-</sup>: 305.0819; found 305.0828.

**8-Fluoro-11-hydroxy-5,6-dihydrochrysen-1,4-dione (5g):** The title compound was prepared

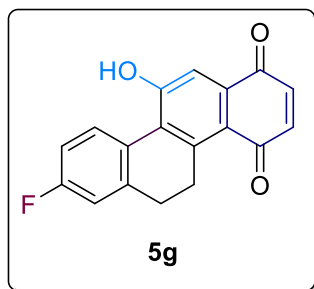

according to the condition B. Red solid (28.2 mg, 48%; eluent: 10%-30% ethyl acetate/hexane). **m.p.** = 239-240 °C. <sup>1</sup>H NMR (400 MHz, DMSO) δ 11.23 (s, 1H), 8.20 (dd, *J* = 8.0, 6.5 Hz, 1H), 7.38 (s, 1H), 7.02 (dd, *J* = 18.1, 9.0 Hz, 2H), 6.80 – 6.70 (m, 2H), 3.22 – 3.08 (m, 2H), 2.59 (d, *J* = 5.9 Hz, 2H). <sup>13</sup>C NMR (101 MHz, DMSO) δ 186.09, 184.97, 161.68 (d, *J* = 246.2 Hz), 158.75, 144.69, 141.87, 141.79, 136.39, 133.21, 131.33 (d, *J* = 8.3 Hz), 127.56 (d, *J* = 2.9 Hz), 126.65, 121.76, 113.98 (d, *J* = 21.2 Hz),

113.09, 112.90, 28.35, 25.92. <sup>19</sup>F NMR (377 MHz, DMSO) δ -113.44. HRMS (ESI): calcd for C<sub>18</sub>H<sub>10</sub>FO<sub>3</sub> [M - H]<sup>-</sup>: 293.0620; found 293.0618.

**8-Chloro-11-hydroxy-5,6-dihydrochrysen-1,4-dione (5h):** The title compound was prepared

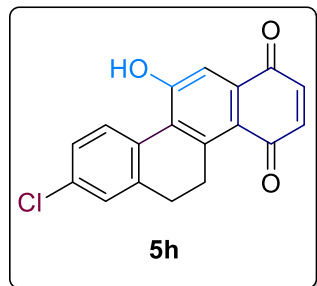

according to the condition B. Red solid (22.9 mg, 37%; eluent: 10%-30% ethyl acetate/hexane). **m.p.** = 228-229 °C. <sup>1</sup>H NMR (400 MHz, DMSO) δ 11.32 (s, 1H), 8.19 (d, *J* = 8.6 Hz, 1H), 7.42 (s, 1H), 7.30 (d, *J* = 2.0 Hz, 1H), 7.25 (dd, *J* = 8.6, 2.2 Hz, 1H), 6.84 – 6.77 (m, 2H), 3.24 – 3.17 (m, 2H), 2.64 – 2.57 (m, 2H). <sup>13</sup>C NMR (101 MHz, DMSO) δ 185.96, 184.89, 158.99, 144.98, 141.83, 141.08, 136.33, 133.45, 132.50, 130.80, 129.99, 126.96, 126.34, 126.20, 121.67, 113.11, 28.06, 25.89. HRMS (ESI): calcd for C<sub>18</sub>H<sub>10</sub>ClO<sub>3</sub> [M - H]<sup>-</sup>: 309.0325; found 309.0323.



**9-Hydroxy-2,3-dihydro-1*H*-benzo[3,4]cyclohepta[1,2-*a*]naphthalene-10,13-dione (5i):** The

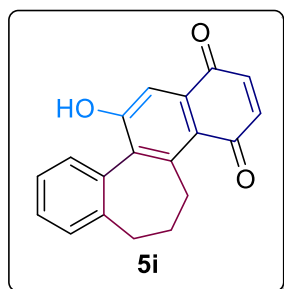

title compound was prepared according to the condition B. Red solid (25.4 mg, 44%; eluent: 10%-30% ethyl acetate/hexane). **m.p.** = 177-178 °C. <sup>1</sup>H NMR (400 MHz, DMSO) δ 10.93 (s, 1H), 7.53 – 7.48 (m, 2H), 7.33 – 7.26 (m, 3H), 6.92 – 6.86 (m, 2H), 3.80 (dd, *J* = 11.6, 3.3 Hz, 1H), 2.55 (dd, *J* = 11.8, 6.1 Hz, 1H), 2.22 – 2.10 (m, 2H), 2.04 – 1.94 (m, 1H), 1.80 (td, *J* = 12.3, 6.6 Hz, 1H). <sup>13</sup>C NMR (101 MHz, DMSO) δ 186.45, 185.27, 158.24, 144.79, 141.84, 140.12, 136.46, 134.72, 134.02, 133.43, 130.81, 128.58, 128.46, 125.97, 121.90, 112.53, 32.09, 31.09, 27.25. HRMS (ESI): calcd for C<sub>19</sub>H<sub>13</sub>O<sub>3</sub> [*M* - *H*]<sup>+</sup>: 289.0871; found 289.0870.

## Step 2

**Table S4. Optimization of the reduction conditions**

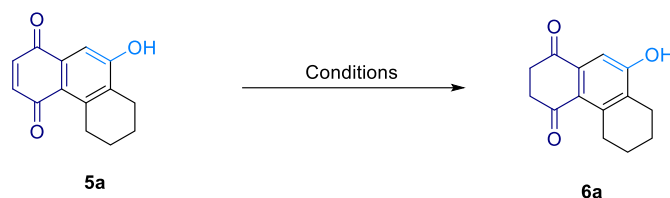

| Entry | Reaction conditions                                                                | Isolated yield of <b>6a</b> |
|-------|------------------------------------------------------------------------------------|-----------------------------|
| 1     | 5 equiv NaBH <sub>4</sub> /MeOH/rt/24h                                             | Complex mixture             |
| 2     | 5 equiv NaBH <sub>4</sub> /MeOH/reflux/24h                                         | Complex mixture             |
| 3     | 1 equiv CeCl <sub>3</sub> ·H <sub>2</sub> O/4 equiv NaBH <sub>4</sub> /MeOH/rt/24h | Complex mixture             |
| 4     | 10 mol% PtO <sub>2</sub> /H <sub>2</sub> /EtOH/rt/0.5h                             | NR                          |
| 5     | 20 equiv SnCl <sub>2</sub> /4N HCl (7 mL)/reflux/75 min                            | trace                       |
| 6     | 3 equiv SnCl <sub>2</sub> /TFA/100 °C/1.5h                                         | 37%                         |
| 7     | 3 equiv SnCl <sub>2</sub> /HOAc/100 °C/1.5h                                        | 82%                         |

**Procedure:** An oven dried 35 mL Schlenk tube equipped with a stir bar was fitted with a rubber septum and cooled under vacuum. After cooling, the tube was charged with **5** (0.2 mmol), SnCl<sub>2</sub> (0.6 mmol, 114 mg) and acetic acid (4 mL) under Air. The reaction mixture was stirred at pre-heated 100 °C heating mantle for 1.5 h. Upon completion, saturated aqueous sodium bicarbonate solution was added to neutralize the acid. The aqueous mixture was extracted with ethyl acetate (25 mL) for three times. The combined organic layer was dried over anhydrous sodium sulfate, filtered, and the filtrate was concentrated under reduced pressure. The residue was then purified by silica gel chromatography to obtain the corresponding product **6**.

**9-Hydroxy-2,3,5,6,7,8-hexahydrophenanthrene-1,4-dione (6a):** The title compound was

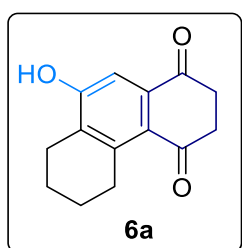

prepared according to the abovementioned procedure. Yellow solid (37.8 mg, 82%; eluent: 10%-30% ethyl acetate/hexane). **m.p.** = 253-254 °C. <sup>1</sup>H NMR (400 MHz, DMSO) δ 10.68 (s, 1H), 7.23 (s, 1H), 3.03 (d, *J* = 5.6 Hz, 2H), 2.98 – 2.86 (m, 4H), 2.60 (d, *J* = 5.8 Hz, 2H), 1.70 – 1.64 (m, 4H). <sup>13</sup>C NMR (101 MHz, DMSO) δ 197.61, 196.89, 159.64, 141.58, 136.09, 131.94, 126.14, 108.73, 37.62, 28.98, 24.47, 22.78, 21.48.

HRMS (ESI): calcd for  $C_{14}H_{13}O_3$  [M - H]<sup>-</sup>: 229.0871; found 229.0869.

**6-(Tert-butyl)-9-hydroxy-2,3,5,6,7,8-hexahydrophenanthrene-1,4-dione (6b):** The title compound was prepared according to the abovementioned procedure.

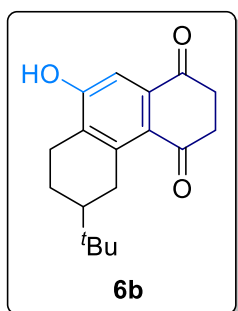

Gray solid (34 mg, 59%; eluent: 10%-30% ethyl acetate/hexane). **m.p.** = 204-205 °C. <sup>1</sup>H NMR (400 MHz, DMSO) δ 10.62 (s, 1H), 7.19 (s, 1H), 3.31 – 3.19 (m, 1H), 2.99 – 2.82 (m, 4H), 2.81 – 2.73 (m, 1H), 2.60 – 2.52 (m, 1H), 2.35 (ddd, *J* = 17.8, 12.2, 5.6 Hz, 1H), 1.91 (dd, *J* = 11.6, 4.1 Hz, 1H), 1.17 (td, *J* = 12.3, 3.4 Hz, 1H), 1.12 – 1.03 (m, 1H), 0.90 (s, 9H). <sup>13</sup>C NMR (101 MHz, DMSO) δ 197.54, 196.81, 159.44, 142.16, 136.31, 131.82, 126.16, 108.70, 44.13, 39.54, 37.60, 32.59, 30.56, 27.50, 25.59, 22.85. HRMS (ESI): calcd for  $C_{18}H_{21}O_3$  [M - H]<sup>-</sup>: 285.1497;

found 285.1497.

**9-Hydroxy-6,6-dimethyl-2,3,5,6,7,8-hexahydrophenanthrene-1,4-dione (6c):** The title compound was prepared according to the abovementioned procedure.

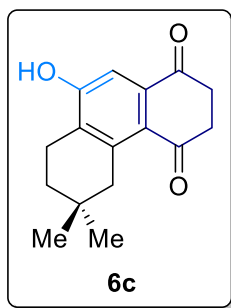

Yellow solid (39 mg, 76%; eluent: 10%-30% ethyl acetate/hexane). **m.p.** = 195-196 °C. <sup>1</sup>H NMR (400 MHz, DMSO) δ 10.72 (s, 1H), 7.25 (s, 1H), 2.98 – 2.87 (m, 4H), 2.85 (s, 2H), 2.64 (t, *J* = 6.7 Hz, 2H), 1.49 (t, *J* = 6.8 Hz, 2H), 0.91 (s, 6H). <sup>13</sup>C NMR (101 MHz, DMSO) δ 197.77, 196.83, 159.57, 140.67, 136.50, 130.70, 126.47, 108.71, 42.35, 39.60, 37.65, 33.74, 28.79, 28.41, 21.89. HRMS (ESI): calcd for  $C_{16}H_{17}O_3$  [M - H]<sup>-</sup>: 257.1184; found 257.1180.

**6-Hydroxy-2,3,8,9,10,11-hexahydro-1H-cyclohepta[a]naphthalene-1,4(7H)-dione (6d):** The title compound was prepared according to the abovementioned procedure.

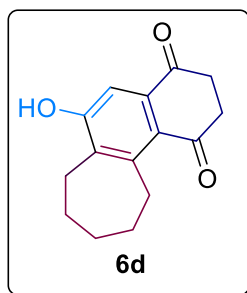

Yellow solid (35.6 mg, 73%; eluent: 10%-30% ethyl acetate/hexane). **m.p.** = 223-224 °C. <sup>1</sup>H NMR (400 MHz, DMSO) δ 10.58 (s, 1H), 7.28 (s, 1H), 3.23 – 3.19 (m, 2H), 3.00 – 2.89 (m, 6H), 1.76 (dd, *J* = 11.3, 5.8 Hz, 2H), 1.57 (d, *J* = 4.0 Hz, 2H), 1.51 (d, *J* = 4.5 Hz, 2H). <sup>13</sup>C NMR (101 MHz, DMSO) δ 198.86, 196.43, 158.08, 147.57, 138.36, 135.81, 127.01, 110.34, 37.84, 31.67, 28.99, 26.89, 26.82, 24.95. HRMS (ESI): calcd for  $C_{15}H_{15}O_3$  [M - H]<sup>-</sup>: 243.1027;

found 243.1026.

**11-Hydroxy-2,3-dihydro-1H-naphtho[1,2-c]chromene-1,4(5H)-dione (6e):** The title compound was prepared according to the abovementioned procedure.

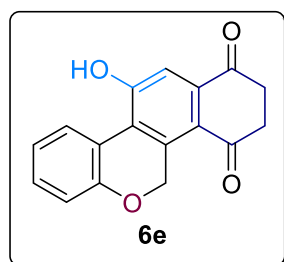

Red solid (27.8 mg, 50%; eluent: 10%-30% ethyl acetate/hexane). **m.p.** > 300 °C. <sup>1</sup>H NMR (400 MHz, DMSO) δ 11.54 (s, 1H), 8.40 (dd, *J* = 7.9, 1.1 Hz, 1H), 7.50 (s, 1H), 7.34 – 7.28 (m, 1H), 7.09 (t, *J* = 7.2 Hz, 1H), 7.02 (d, *J* = 8.0 Hz, 1H), 5.39 (s, 2H), 3.02 (s, 4H). <sup>13</sup>C NMR (101 MHz, DMSO) δ 197.60, 196.02, 158.69, 155.48, 137.88, 136.67, 130.45, 129.34, 124.85, 122.65, 122.18, 121.17, 116.93,

112.89, 65.99, 38.68, 37.49. HRMS (ESI): calcd for C<sub>17</sub>H<sub>11</sub>O<sub>4</sub> [M - H]<sup>-</sup>: 279.0664; found 279.0661.

**11-Hydroxy-8-methoxy-2,3,5,6-tetrahydrochrysen-1,4-dione (6f):** The title compound was

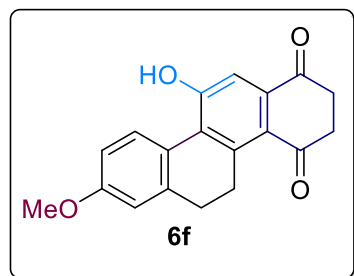

prepared according to the abovementioned procedure. Red solid (34.2 mg, 56%; eluent: 10%-30% ethyl acetate/hexane).

**m.p.** = 173-174 °C. <sup>1</sup>H NMR (400 MHz, DMSO) δ 11.02 (s, 1H), 8.24 (d, *J* = 8.6 Hz, 1H), 7.46 (s, 1H), 6.85 (dt, *J* = 8.7, 2.6 Hz, 2H), 3.79 (s, 3H), 3.17 – 3.08 (m, 2H), 2.98 (d, *J* = 2.8 Hz, 4H), 2.66 – 2.58 (m, 2H). <sup>13</sup>C NMR (101 MHz, DMSO) δ 198.02, 196.18, 159.24, 158.21, 142.41, 141.03, 135.74, 130.69, 128.17, 126.48, 124.04, 112.65, 112.08, 111.88, 55.50,

39.67, 37.70, 29.01, 26.20. HRMS (ESI): calcd for C<sub>19</sub>H<sub>15</sub>O<sub>4</sub> [M - H]<sup>-</sup>: 307.0977; found 307.0975.

**8-Fluoro-11-hydroxy-2,3,5,6-tetrahydrochrysen-1,4-dione (6g):** The title compound was

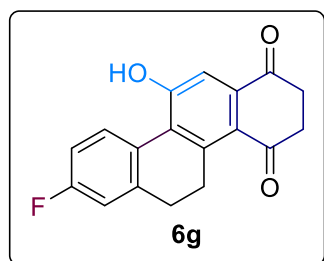

prepared according to the abovementioned procedure. Red solid (40.5 mg, 69%; eluent: 10%-30% ethyl acetate/hexane). **m.p.** = 244-245 °C. <sup>1</sup>H NMR (400 MHz, DMSO) δ 11.17 (s, 1H), 8.30 (dd, *J* = 8.8, 6.0 Hz, 1H), 7.47 (s, 1H), 7.16 – 7.04 (m, 2H), 3.17 – 3.10 (m, 2H), 3.04 – 2.92 (m, 4H), 2.69 – 2.60 (m, 2H). <sup>13</sup>C NMR (101 MHz, DMSO) δ 197.83, 196.17, 161.71 (d, *J* = 246.2 Hz), 158.49, 142.99, 142.17 (d, *J* = 8.0 Hz), 136.42, 131.29 (d, *J* = 8.2

Hz), 127.79 (d, *J* = 2.9 Hz), 127.13, 126.38, 114.03 (d, *J* = 21.2 Hz), 113.00 (d, *J* = 20.7 Hz), 112.19, 39.57, 37.68, 28.61, 25.98. <sup>19</sup>F NMR (377 MHz, DMSO) δ -113.51. HRMS (ESI): calcd for C<sub>18</sub>H<sub>12</sub>FO<sub>3</sub> [M - H]<sup>-</sup>: 295.0777; found 295.0776.

**8-Chloro-11-hydroxy-5,6-dihydrochrysen-1,4-dione (6h):** The title compound was prepared

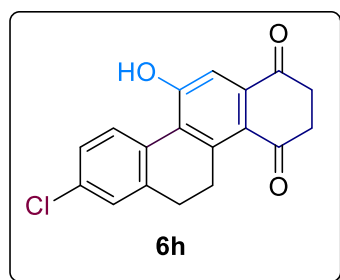

according to the abovementioned procedure. Yellow solid (46.7 mg, 75%; eluent: 10%-30% ethyl acetate/hexane). **m.p.** = 225-226 °C. <sup>1</sup>H NMR (400 MHz, DMSO) δ 11.26 (s, 1H), 8.28 (d, *J* = 8.6 Hz, 1H), 7.47 (s, 1H), 7.39 (d, *J* = 2.3 Hz, 1H), 7.33 (dd, *J* = 8.6, 2.4 Hz, 1H), 3.18 – 3.13 (m, 2H), 3.04 – 2.96 (m, 4H), 2.70 – 2.62 (m, 2H). <sup>13</sup>C NMR (101 MHz, DMSO) δ 197.82, 196.21, 158.75, 143.37, 141.53, 136.75, 132.53, 130.80, 130.27, 127.12, 126.86, 126.39, 126.29, 112.20, 37.70, 28.32,

26.02. HRMS (ESI): calcd for C<sub>18</sub>H<sub>12</sub>ClO<sub>3</sub> [M - H]<sup>-</sup>: 311.0481; found 311.0479.

**8-Chloro-11-hydroxy-5,6-dihydrochrysen-1,4-dione (6i):** The title compound was prepared

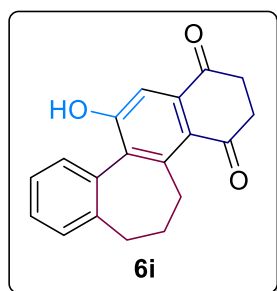

according to the abovementioned procedure. Yellow solid (43.8 mg, 75%; eluent: 10%-30% ethyl acetate/hexane). **m.p.** = 191-192 °C. <sup>1</sup>H NMR (400 MHz, DMSO) δ 10.75 (s, 1H), 7.53 – 7.50 (m, 1H), 7.49 (s, 1H), 7.33 – 7.31 (m, 1H), 7.31 – 7.28 (m, 2H), 3.58 – 3.51 (m, 1H), 3.20 – 3.02 (m, 2H), 3.01 – 2.93 (m, 1H), 2.87 – 2.79 (m, 1H), 2.57 (dd, *J* = 12.2, 5.9 Hz, 1H), 2.27 – 2.11 (m, 2H), 2.07 – 1.97 (m, 1H), 1.79 (td, *J* = 12.4, 6.3 Hz, 1H). <sup>13</sup>C NMR (101 MHz, DMSO) δ 198.28, 196.39, 157.87, 143.20, 140.13, 137.21, 135.01, 133.91, 130.77, 128.53, 128.45, 126.88, 125.95, 111.64, 39.67, 37.78, 32.78, 30.99, 27.56. HRMS (ESI): calcd for C<sub>19</sub>H<sub>15</sub>O<sub>3</sub> [M - H]<sup>-</sup>: 291.1027; found 291.1026.

### Step 3

**Procedure:** An oven dried 25 mL round bottom flask equipped with a stir bar was fitted with a rubber septum and cooled under vacuum. After cooling, the flask was charged with **6** (0.2 mmol) and THF (10 mL), and was evacuated and refilled with Argon for three times. Then, LiAlH<sub>4</sub> (0.6 mmol, 1M THF, 0.6 mL) was dropwise added to the reaction mixture, which was stirred at room temperature for 1.5 h. Upon completion, 2M HCl was added to adjust the pH of the mixture to be slight acidic. The aqueous phase was extracted with ethyl acetate (25 mL) for three times, and the combined organic layer was dried over anhydrous sodium sulfate, filtered and the filtrate was concentrated under reduced pressure. The residue was then purified by silica gel chromatography to obtain the corresponding product **7**.

**5,6,7,8-Tetrahydrophenanthren-9-ol (7a):** The title compound was prepared according to the

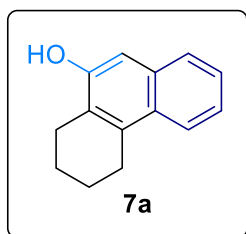

abovementioned procedure. White solid (23.5 mg, 60%; eluent: 2%-10% ethyl acetate/hexane). **m.p.** = 112-113 °C. <sup>1</sup>H NMR (400 MHz, DMSO) δ 9.68 (s, 1H), 7.80 (d, *J* = 8.3 Hz, 1H), 7.61 (d, *J* = 7.6 Hz, 1H), 7.35 – 7.30 (m, 1H), 7.25 (ddd, *J* = 8.1, 6.9, 1.3 Hz, 1H), 7.01 (s, 1H), 2.99 (t, *J* = 6.0 Hz, 2H), 2.71 (t, *J* = 6.0 Hz, 2H), 1.88 – 1.72 (m, 4H). <sup>13</sup>C NMR (101 MHz, DMSO) δ 154.17, 133.25, 133.21, 127.28, 126.99, 126.63, 125.37, 123.00, 122.91, 106.29, 25.86, 24.30, 22.90, 22.55. HRMS (ESI): calcd for C<sub>14</sub>H<sub>13</sub>O [M - H]<sup>-</sup>: 197.0973; found 197.0972.

**6-(Tert-butyl)-5,6,7,8-tetrahydrophenanthren-9-ol (7b):** The title compound was prepared

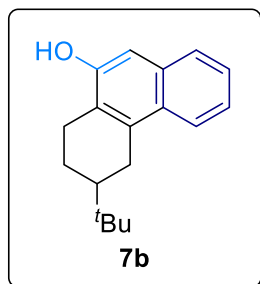

according to the abovementioned procedure. Yellow oil (38.1 mg, 75%; eluent: 2%-10% ethyl acetate/hexane). <sup>1</sup>H NMR (400 MHz, DMSO) δ 9.66 (s, 1H), 7.89 (d, *J* = 8.3 Hz, 1H), 7.60 (d, *J* = 7.8 Hz, 1H), 7.32 (t, *J* = 7.0 Hz, 1H), 7.29 – 7.23 (m, 1H), 6.98 (s, 1H), 3.17 (dd, *J* = 16.8, 4.4 Hz, 1H), 3.00 (dd, *J* = 17.6, 3.6 Hz, 1H), 2.69 – 2.60 (m, 1H), 2.48 (dd, *J* = 22.2, 3.0 Hz, 1H), 2.09 – 2.01 (m, 1H), 1.45 (ddd, *J* = 11.9, 4.7, 3.2 Hz, 1H), 1.28 – 1.15 (m, 1H), 1.01 (s, 9H). <sup>13</sup>C NMR (101 MHz, DMSO) δ 154.01, 133.54, 133.37, 127.46, 126.97, 126.67, 125.35,

123.04, 122.90, 106.21, 44.27, 32.77, 27.63, 25.64, 23.96. HRMS (ESI): calcd for C<sub>18</sub>H<sub>21</sub>O [M - H]<sup>-</sup>: 253.1599; found 253.1598.

**6,6-Dimethyl-5,6,7,8-tetrahydrophenanthren-9-ol (7c):** The title compound was prepared

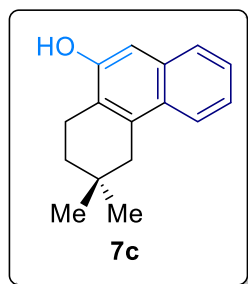

according to the abovementioned procedure. White solid (29.9 mg, 66%; eluent: 2%-10% ethyl acetate/hexane). **m.p.** = 98-99 °C. <sup>1</sup>H NMR (400 MHz, DMSO) δ 9.72 (s, 1H), 7.82 (d, *J* = 8.3 Hz, 1H), 7.62 (d, *J* = 7.8 Hz, 1H), 7.32 (t, *J* = 7.2 Hz, 1H), 7.28 – 7.22 (m, 1H), 7.03 (s, 1H), 2.79 (s, 2H), 2.75 (t, *J* = 6.5 Hz, 2H), 1.56 (t, *J* = 6.6 Hz, 2H), 1.01 (s, 6H). <sup>13</sup>C NMR (101 MHz, DMSO) δ 154.14, 133.52, 132.48, 127.44, 126.69, 125.57, 125.34, 122.97, 122.86, 106.28, 39.55, 34.96, 29.05, 28.61, 21.89. HRMS (ESI): calcd for C<sub>16</sub>H<sub>17</sub>O [M - H]<sup>-</sup>: 225.1286; found

225.1286.

**8,9,10,11-Tetrahydro-7H-cyclohepta[a]naphthalen-6-ol (7d):** The title compound was prepared

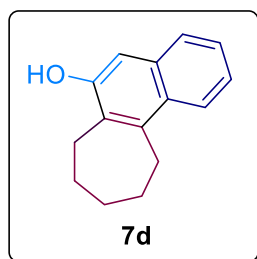

according to the abovementioned procedure. White solid (37.3 mg, 88%; eluent: 2%-10% ethyl acetate/hexane). **m.p.** = 127-128 °C. <sup>1</sup>H NMR (400 MHz, DMSO) δ 9.70 (s, 1H), 7.96 (d, *J* = 8.5 Hz, 1H), 7.61 (d, *J* = 8.1 Hz, 1H), 7.30 (t, *J* = 7.3 Hz, 1H), 7.25 – 7.20 (m, 1H), 7.08 (s, 1H), 3.21 – 3.15 (m, 2H), 3.06 – 3.01 (m, 2H), 1.83 (s, 2H), 1.62 – 1.49 (m, 4H). <sup>13</sup>C NMR (101 MHz, DMSO) δ 153.27, 140.95, 133.84, 132.58, 126.85, 126.52, 125.28, 123.72, 122.95, 107.46, 32.31, 27.88, 27.06,

27.02, 25.52. HRMS (ESI): calcd for C<sub>15</sub>H<sub>15</sub>O [M - H]<sup>-</sup>: 211.1129; found 211.1128.

**5H-naphtho[1,2-c]chromen-11-ol (7e):** The title compound was prepared according to the

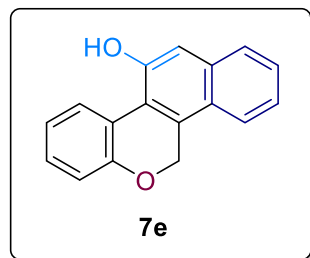

abovementioned procedure. Light yellow solid (25.6 mg, 52%; eluent: 2%-10% ethyl acetate/hexane). **m.p.** = 163-165 °C. <sup>1</sup>H NMR (400 MHz, DMSO) δ 10.45 (s, 1H), 8.54 (dd, *J* = 7.9, 1.4 Hz, 1H), 7.95 (d, *J* = 8.4 Hz, 1H), 7.72 (d, *J* = 8.1 Hz, 1H), 7.43 (t, *J* = 7.4 Hz, 1H), 7.37 – 7.32 (m, 1H), 7.29 (s, 1H), 7.29 – 7.24 (m, 1H), 7.11 – 7.07 (m, 1H), 7.07 – 7.03 (m, 1H), 5.53 (s, 2H). <sup>13</sup>C NMR (101 MHz, DMSO) δ 155.05, 153.01, 134.24, 130.45, 129.30,

129.17, 126.83, 126.77, 124.01, 123.82, 123.45, 122.68, 121.99, 119.16, 116.80, 110.47, 65.10. HRMS (ESI): calcd for C<sub>17</sub>H<sub>11</sub>O<sub>2</sub> [M - H]<sup>-</sup>: 247.0765; found 247.0765.

**2-Methoxy-11,12-dihydrochrysen-5-ol (7f):** The title compound was prepared according to the

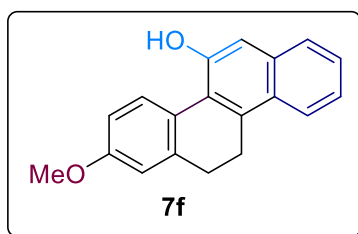

abovementioned procedure. Red solid (25.7 mg, 47%; eluent: 2%-10% ethyl acetate/hexane). **m.p.** = 107-108 °C. <sup>1</sup>H NMR (400 MHz, DMSO) δ 10.05 (s, 1H), 8.36 (d, *J* = 8.7 Hz, 1H), 8.00 (d, *J* = 8.4 Hz, 1H), 7.65 (d, *J* = 8.0 Hz, 1H), 7.35 (t, *J* = 7.4 Hz, 1H), 7.28 (t, *J* = 7.5 Hz, 1H), 7.20 (s, 1H), 6.90 (d, *J* = 2.6 Hz, 1H), 6.85 (dd, *J* = 8.8, 2.7 Hz, 1H), 3.80 (s, 3H), 3.13 – 3.06 (m, 2H), 2.82 – 2.76 (m, 2H). <sup>13</sup>C NMR (101 MHz,

DMSO) δ 158.44, 153.33, 139.98, 135.54, 133.75, 130.25, 126.59, 126.42, 126.07, 124.09, 123.93, 123.41, 112.96, 111.71, 109.19, 55.47, 29.51, 24.70. HRMS (ESI): calcd for C<sub>19</sub>H<sub>15</sub>O<sub>2</sub> [M - H]<sup>-</sup>: 275.1078; found 275.1077.

**2-Fluoro-11,12-dihydrochrysen-5-ol (7g):** The title compound was prepared according to the

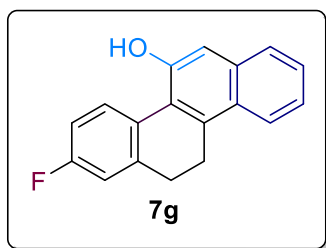

abovementioned procedure. White solid (23.8 mg, 45%; eluent: 2%-10% ethyl acetate/hexane). **m.p.** = 145-146 °C. <sup>1</sup>H NMR (400 MHz, DMSO) δ 10.21 (s, 1H), 8.46 (dd, *J* = 8.8, 6.1 Hz, 1H), 8.06 (d, *J* = 8.4 Hz, 1H), 7.69 (d, *J* = 7.6 Hz, 1H), 7.43 – 7.39 (m, 1H), 7.32 (ddd, *J* = 8.2, 6.8, 1.3 Hz, 1H), 7.25 (s, 1H), 7.21 (dd, *J* = 9.3, 2.8 Hz, 1H), 7.12 (td, *J* = 8.9, 2.9 Hz, 1H), 3.18 – 3.13 (m, 2H), 2.88 – 2.83 (m, 2H). <sup>13</sup>C NMR (101 MHz, DMSO) δ 162.36,

159.93, 153.24, 141.17 (d, *J* = 7.8 Hz), 136.43, 134.12, 130.81 (d, *J* = 8.0 Hz), 129.76 (d, *J* = 3.0 Hz), 126.59 (d, *J* = 12.8 Hz), 126.28, 124.32, 123.56, 123.11, 114.18 (d, *J* = 21.1 Hz), 112.85 (d, *J* = 20.4 Hz), 109.33, 29.06, 24.47. <sup>19</sup>F NMR (377 MHz, DMSO) δ -115.32. HRMS (ESI): calcd for C<sub>18</sub>H<sub>12</sub>FO [M - H]<sup>-</sup>: 263.0878; found 263.0877.

**2-Chloro-11,12-dihydrochrysen-5-ol (7h):** The title compound was prepared according to the

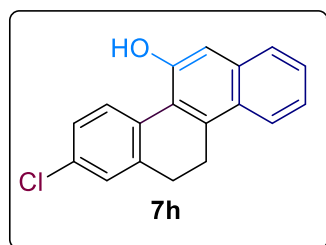

abovementioned procedure. Light yellow solid (24.3 mg, 43%; eluent: 2%-10% ethyl acetate/hexane). **m.p.** = 125-126 °C. <sup>1</sup>H NMR (400 MHz, DMSO) δ 10.24 (s, 1H), 8.42 (d, *J* = 8.6 Hz, 1H), 8.01 (d, *J* = 8.5 Hz, 1H), 7.68 (d, *J* = 8.0 Hz, 1H), 7.39 (dd, *J* = 8.4, 6.0 Hz, 2H), 7.35 – 7.27 (m, 2H), 7.25 (s, 1H), 3.15 – 3.07 (m, 2H), 2.85 – 2.77 (m, 2H). <sup>13</sup>C NMR (101 MHz, DMSO) δ 153.35, 140.61, 136.95, 134.35, 132.24, 131.36, 130.51, 127.20,

126.72, 126.68, 126.25, 126.22, 124.39, 123.61, 122.90, 109.40, 28.76, 24.49. HRMS (ESI): calcd for C<sub>18</sub>H<sub>12</sub>ClO [M - H]<sup>-</sup>: 279.0583; found 279.0581.

**2,3-Dihydro-1H-benzo[3,4]cyclohepta[1,2-*a*]naphthalen-8-ol (7i):** The title compound was

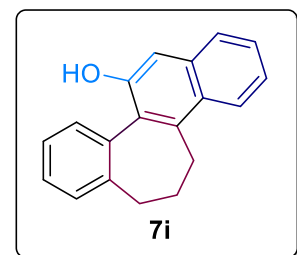

prepared according to the abovementioned procedure. Light yellow solid (39.0 mg, 75%; eluent: 2%-10% ethyl acetate/hexane). **m.p.** = 125-126 °C. <sup>1</sup>H NMR (400 MHz, DMSO) δ 9.76 (s, 1H), 8.05 (d, *J* = 8.5 Hz, 1H), 7.71 (d, *J* = 8.0 Hz, 1H), 7.58 (d, *J* = 7.0 Hz, 1H), 7.39 (t, *J* = 7.4 Hz, 1H), 7.35 – 7.31 (m, 1H), 7.29 (dd, *J* = 5.1, 3.4 Hz, 3H), 7.23 (s, 1H), 3.34 (d, *J* = 16.0 Hz, 1H), 2.54 (t, *J* = 7.1 Hz, 1H), 2.23 – 2.11 (m, 4H). <sup>13</sup>C NMR (101 MHz, DMSO) δ 152.48,

139.99, 137.12, 137.03, 134.71, 131.03, 128.63, 128.48, 127.66, 126.94, 126.26, 126.17, 125.75, 124.28, 123.50, 108.60, 33.45, 31.32, 25.47. HRMS (ESI): calcd for C<sub>19</sub>H<sub>15</sub>O [M - H]<sup>-</sup>: 259.1129; found 259.1129.

## VI. Halogenation of 2-naphthols

**Condition A:** An oven dried 35 mL Schlenk tube equipped with a stir bar was fitted with a rubber septum and cooled under vacuum. After cooling, the tube was charged with **7** (0.1 mmol), TsOH (0.1 mmol, 17.2 mg), NIS (0.1 mmol, 22.4 mg) and MeCN (2 mL) under Argon, and was evacuated and refilled with Argon for three times. Then, the septum was replaced by a Teflon screwcap under Argon flow. The reaction mixture was stirred at room temperature for 1 h. Upon completion, the reaction mixture was diluted with 10 mL of ethyl acetate, filtered through a pad of

silica gel, followed by washing the pad of the silica gel with the ethyl acetate (30 mL). The filtrate was concentrated under reduced pressure. The residue was then purified by chromatography on silica gel to provide the corresponding product **9**.

**Condition B:** An oven dried 35 mL Schlenk tube equipped with a stir bar was fitted with a rubber septum and cooled under vacuum. After cooling, the tube was charged with **7** (0.1 mmol), NBS (0.1 mmol, 18.0 mg) and DCM (2 mL) under Argon, and was evacuated and refilled with Argon for three times. Then, the septum was replaced by a Teflon screwcap under Argon flow. The reaction mixture was stirred at room temperature for 1 h. Upon completion, the reaction mixture was diluted with 10 mL of ethyl acetate, filtered through a pad of silica gel, followed by washing the pad of the silica gel with the ethyl acetate (30 mL). The filtrate was concentrated under reduced pressure. The residue was then purified by chromatography on silica gel to provide the corresponding product **9**.

**10-Iodo-6,6-dimethyl-5,6,7,8-tetrahydrophenanthren-9-ol (9a):** The title compound was prepared according to the condition A. Light yellow oil (41.7 mg, 60%; eluent: 0%-2% ethyl acetate/hexane).  $^1\text{H}$  NMR (400 MHz, DMSO)  $\delta$  9.19 (s, 1H), 7.97 (d,  $J = 8.1$  Hz, 1H), 7.86 (d,  $J = 8.3$  Hz, 1H), 7.48 (t,  $J = 7.3$  Hz, 1H), 7.40 – 7.32 (m, 1H), 2.80 (d,  $J = 10.6$  Hz, 4H), 1.56 (t,  $J = 6.5$  Hz, 2H), 1.00 (s, 6H).  $^{13}\text{C}$  NMR (101 MHz, DMSO)  $\delta$  154.02, 133.83, 133.37, 131.30, 129.20, 127.25, 126.39, 124.31, 123.60, 85.56, 39.66, 34.85, 28.91, 28.45, 23.26. HRMS (ESI): calcd for  $\text{C}_{16}\text{H}_{16}\text{IO}$  [ $\text{M} - \text{H}$ ]: 351.0252; found 351.0251.

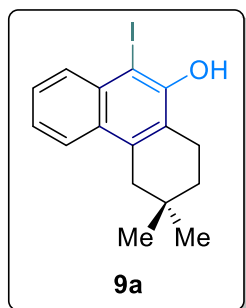

**6-Iodo-2-methoxy-11,12-dihydrochrysen-5-ol (9b):** The title compound was prepared according to the condition A. Light yellow oil (39.0 mg, 49%; eluent: 0%-3% ethyl acetate/hexane).  $^1\text{H}$  NMR (400 MHz, DMSO)  $\delta$  9.43 (s, 1H), 8.15 (d,  $J = 8.7$  Hz, 1H), 8.03 (dd,  $J = 14.7, 8.2$  Hz, 1H), 7.57 – 7.50 (m, 1H), 7.43 – 7.36 (m, 1H), 6.95 (d,  $J = 2.6$  Hz, 1H), 6.88 (dd,  $J = 8.7, 2.8$  Hz, 1H), 3.81 (d,  $J = 3.8$  Hz, 2H), 3.15 – 3.06 (m, 1H), 2.85 – 2.77 (m, 1H).  $^{13}\text{C}$  NMR (101 MHz, DMSO)  $\delta$  158.87, 152.49, 140.19, 136.40, 134.23, 131.69, 129.77, 128.39, 128.00, 126.19, 125.77, 124.87, 124.57, 113.19, 111.94, 90.52, 55.58, 29.22, 25.06. HRMS (ESI): calcd for  $\text{C}_{19}\text{H}_{14}\text{IO}_2$  [ $\text{M} - \text{H}$ ]: 401.0045; found 401.0053.

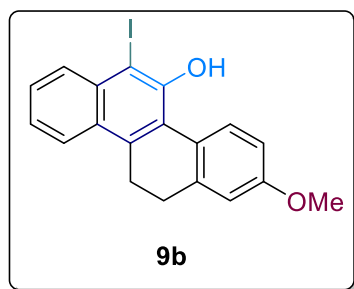

**9-Iodo-2,3-dihydro-1H-benzo[3,4]cyclohepta[1,2-a]naphthalen-8-ol (9c):** The title compound was prepared according to the condition A. Light yellow oil (59.8 mg, 78%; eluent: 0%-3% ethyl acetate/hexane).  $^1\text{H}$  NMR (400 MHz, DMSO)  $\delta$  9.00 (s, 1H), 8.13 – 8.05 (m, 2H), 7.60 – 7.50 (m, 2H), 7.45 – 7.39 (m, 1H), 7.38 – 7.34 (m, 1H), 7.32 (t,  $J = 4.5$  Hz, 2H), 3.45 – 3.33 (m, 1H), 2.57 (d,  $J = 11.2$  Hz, 1H), 2.22 (dd,  $J = 19.7, 11.3$  Hz, 1H), 2.16 – 2.06 (m, 3H).  $^{13}\text{C}$  NMR (101 MHz, DMSO)  $\delta$  152.29, 140.38, 137.63, 136.77, 135.12, 131.78, 130.56, 129.78,

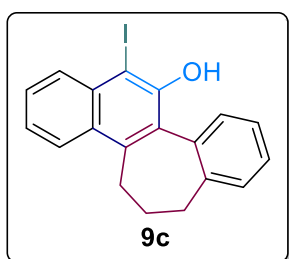

128.65, 128.34, 128.22, 127.90, 126.29, 125.03, 124.89, 88.75, 33.14, 31.15, 25.65. HRMS (ESI): calcd for C<sub>19</sub>H<sub>14</sub>O [M - H]<sup>-</sup>: 385.0096; found 385.0102.

**10-Bromo-6,6-dimethyl-5,6,7,8-tetrahydrophenanthren-9-ol (9d):** The title compound was prepared according to the condition B. White solid (51.5 mg, 84%; eluent: 0%-3% ethyl acetate/hexane). **m.p.**= 75-76 °C. <sup>1</sup>H NMR (400 MHz, DMSO) δ 9.25 (s, 1H), 8.01 (d, *J* = 8.4 Hz, 1H), 7.89 (d, *J* = 8.4 Hz, 1H), 7.51 (t, *J* = 7.6 Hz, 1H), 7.37 (t, *J* = 7.6 Hz, 1H), 2.79 (t, *J* = 6.3 Hz, 2H), 2.75 (s, 2H), 1.54 (t, *J* = 6.4 Hz, 2H), 0.98 (s, 6H). <sup>13</sup>C NMR (101 MHz, DMSO) δ 150.85, 132.40, 131.24, 128.81, 126.99, 126.95, 125.91, 124.20, 123.51, 104.41, 34.76, 28.89, 28.42, 22.92. HRMS (ESI): calcd for C<sub>16</sub>H<sub>16</sub>BrO [M - H]<sup>-</sup>: 303.0391; found 303.0371.

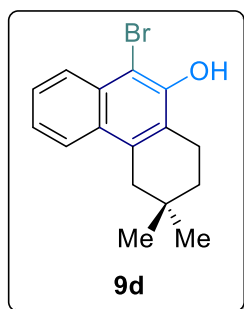

**6-Bromo-2-methoxy-11,12-dihydrochrysen-5-ol (9e):** The title compound was prepared according to the condition B. White solid (63.9 mg, 90%; eluent: 0%-3% ethyl acetate/hexane). **m.p.**= 83-84 °C. <sup>1</sup>H NMR (400 MHz, DMSO) δ 9.48 (s, 1H), 8.23 (d, *J* = 8.7 Hz, 1H), 8.06 (dd, *J* = 17.9, 8.4 Hz, 2H), 7.57 – 7.51 (m, 1H), 7.40 (t, *J* = 7.6 Hz, 1H), 6.92 (d, *J* = 2.6 Hz, 1H), 6.87 (dd, *J* = 8.7, 2.7 Hz, 1H), 3.80 (s, 3H), 3.13 – 3.03 (m, 2H), 2.83 – 2.73 (m, 2H). <sup>13</sup>C NMR (101 MHz, DMSO) δ 158.86, 149.67, 140.24, 135.43, 131.50, 130.16, 127.90, 127.72, 126.18, 126.10, 125.56, 124.74, 124.55, 113.08, 111.86, 108.01, 55.54, 29.24, 24.93. HRMS (ESI): calcd for C<sub>19</sub>H<sub>14</sub>BrO [M - H]<sup>-</sup>: 353.0183; found 353.0183.

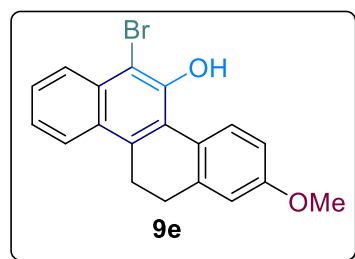

**9-Bromo-2,3-dihydro-1H-benzo[3,4]cyclohepta[1,2-a]naphthalen-8-ol (9f):** The title compound was prepared according to the condition B. Light yellow oil (63.5 mg, 94%; eluent: 0%-3% ethyl acetate/hexane). <sup>1</sup>H NMR (400 MHz, DMSO) δ 9.16 (s, 1H), 8.16 – 8.05 (m, 2H), 7.59 – 7.52 (m, 2H), 7.44 – 7.38 (m, 1H), 7.35 – 7.23 (m, 3H), 3.41 – 3.28 (m, 1H), 2.52 (d, *J* = 11.1 Hz, 1H), 2.23 – 2.03 (m, 4H). <sup>13</sup>C NMR (101 MHz, DMSO) δ 149.34, 140.20, 136.84, 136.58, 132.45, 130.84, 130.10, 128.59, 128.25, 127.95, 127.55, 126.30, 126.06, 124.93, 124.79, 106.94, 33.20, 31.14, 25.62. HRMS (ESI): calcd for C<sub>19</sub>H<sub>14</sub>BrO [M - H]<sup>-</sup>: 337.0234; found 337.0235.

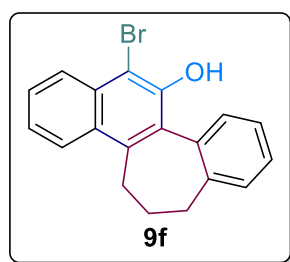

## VII. Syntheses of substituted phenols

**Condition A:** An oven dried 35 mL Schlenk tube equipped with a stir bar was fitted with a rubber septum and cooled under vacuum. After cooling, the tube was charged with **3** (0.1 mmol), Dimethyl acetylenedicarboxylate (0.3 mmol, 37 μL) and Benzene (1 mL) under Argon, and was evacuated and refilled with Argon for three times. Then, the septum was replaced by a Teflon screwcap under Argon flow. The reaction mixture was stirred at pre-heated 120 °C heating mantle for 24 h. Upon completion, the reaction mixture was diluted with 10 mL of ethyl acetate, filtered



through a pad of silica gel, followed by washing the pad of the silica gel with the ethyl acetate (20 mL). The filtrate was concentrated under reduced pressure. The residue was then purified by chromatography on silica gel to provide the corresponding product **11**.

**Condition B:** An oven dried 35 mL Schlenk tube equipped with a stir bar was fitted with a rubber septum and cooled under vacuum. After cooling, the tube was charged with **3** (0.1 mmol), ethyl 4,4,4-trifluorobut-2-ynoate (0.5 mmol, 71  $\mu$ L) and THF (1 mL) under Argon, and was evacuated and refilled with Argon for three times. Then, the septum was replaced by a Teflon screwcap under Argon flow. The reaction mixture was stirred at pre-heated 120  $^{\circ}$ C heating mantle for 24 h. Upon completion, the reaction mixture was diluted with 10 mL of ethyl acetate, filtered through a pad of silica gel, followed by washing the pad of the silica gel with the ethyl acetate (20 mL). The filtrate was concentrated under reduced pressure. The residue was then purified by chromatography on silica gel to provide the corresponding product **11**.

**Dimethyl 4-hydroxy-5,6,7,8-tetrahydronaphthalene-1,2-dicarboxylate (11a):** The title

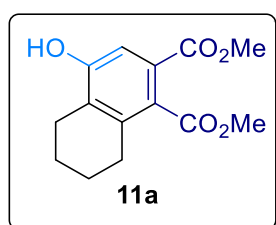

compound was prepared according to the condition A. Light yellow solid (17.6 mg, 67%; eluent: 15%-30% ethyl acetate/hexane). **m.p.** = 108-109  $^{\circ}$ C.  $^1\text{H}$  NMR (400 MHz,  $\text{CDCl}_3$ )  $\delta$  7.19 (s, 1H), 6.46 (s, 1H), 3.90 (s, 3H), 3.82 (s, 3H), 2.71 – 2.62 (m, 4H), 1.80 – 1.70 (m, 4H).  $^{13}\text{C}$  NMR (101 MHz,  $\text{CDCl}_3$ )  $\delta$  170.84, 166.57, 154.33, 136.27, 129.92, 127.60, 125.50, 113.05, 52.56, 52.46, 26.59, 23.48, 22.17, 21.73. HRMS (ESI): calcd for  $\text{C}_{14}\text{H}_{15}\text{O}_5$  [M - H]: 263.0926; found 263.0925.

**Dimethyl 10-hydroxy-6H-benzo[c]chromene-7,8-dicarboxylate (11b):** The title compound was

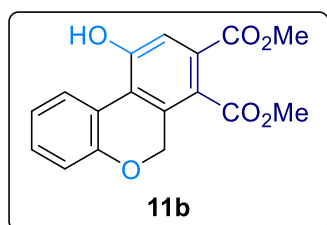

prepared according to the condition A. White solid (22.4 mg, 71%; eluent: 15%-30% ethyl acetate/hexane). **m.p.** = 152-153  $^{\circ}$ C.  $^1\text{H}$  NMR (400 MHz, DMSO)  $\delta$  11.12 (s, 1H), 8.46 (dd,  $J$  = 8.0, 1.5 Hz, 1H), 7.46 (s, 1H), 7.30 (td,  $J$  = 8.0, 1.6 Hz, 1H), 7.10 (td,  $J$  = 8.0, 1.3 Hz, 1H), 7.02 (dd,  $J$  = 8.1, 1.1 Hz, 1H), 4.96 (s, 2H), 3.83 (s, 3H), 3.82 (s, 3H).  $^{13}\text{C}$  NMR (101 MHz, DMSO)  $\delta$  167.93, 166.32, 155.55, 155.20, 133.10, 130.34, 129.36, 129.23, 122.36,

122.10, 121.15, 120.39, 117.17, 117.04, 65.82, 53.18, 53.07. HRMS (ESI): calcd for  $\text{C}_{17}\text{H}_{13}\text{O}_6$  [M - H]: 313.0718; found 313.0717.

**Dimethyl 7-fluoro-4-hydroxy-9,10-dihydrophenanthrene-1,2-dicarboxylate (11c):** The title

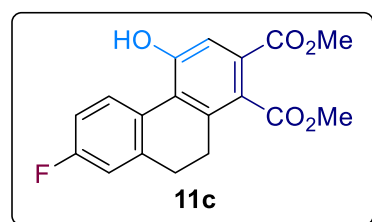

compound was prepared according to the condition A. Yellow solid (20.2 mg, 61%; eluent: 15%-30% ethyl acetate/hexane). **m.p.** = 164-165  $^{\circ}$ C.  $^1\text{H}$  NMR (400 MHz, DMSO)  $\delta$  10.74 (s, 1H), 8.43 (dd,  $J$  = 8.8, 6.1 Hz, 1H), 7.46 (s, 1H), 7.14 (ddd,  $J$  = 20.4, 9.1, 2.7 Hz, 2H), 3.83 (s, 3H), 3.81 (s, 3H), 2.77 – 2.70 (m, 2H), 2.68 – 2.61 (m, 2H).  $^{13}\text{C}$  NMR (101 MHz,

DMSO)  $\delta$  169.25, 166.01, 162.83, 160.39, 155.28, 141.69 (d,  $J$  = 8.0 Hz), 137.75, 131.25 (d,  $J$  = 8.4 Hz), 128.03 (d,  $J$  = 2.9 Hz), 127.35, 125.04 (d,  $J$  = 70.3 Hz), 116.21, 114.49 (d,  $J$  = 21.4 Hz),

113.23 (d,  $J = 20.8$  Hz), 53.02, 52.77, 28.63, 26.48.  $^{19}\text{F}$  NMR (377 MHz, DMSO)  $\delta$  -113.60. HRMS (ESI): calcd for  $\text{C}_{18}\text{H}_{14}\text{FO}_5$  [ $\text{M} - \text{H}$ ]: 329.0832; found 329.0828.

**Ethyl 1-hydroxy-3-(trifluoromethyl)-9,10-dihydrophenanthrene-4-carboxylate (11d):** The

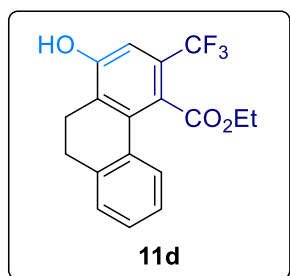

title compound was prepared according to the condition B. White solid (29.6 mg, 88%; eluent: 5%-15% ethyl acetate/hexane). **m.p.** = 106-107 °C.  $^1\text{H}$  NMR (400 MHz, DMSO)  $\delta$  10.69 (s, 1H), 7.43 (dd,  $J = 7.4, 1.5$  Hz, 1H), 7.36 – 7.32 (m, 1H), 7.31 – 7.28 (m, 1H), 7.28 – 7.24 (m, 1H), 7.21 (s, 1H), 4.21 (q,  $J = 7.1$  Hz, 2H), 2.72 (s, 4H), 1.16 (t,  $J = 7.1$  Hz, 3H).  $^{13}\text{C}$  NMR (101 MHz, DMSO)  $\delta$  168.72, 155.31, 139.27, 135.74, 132.76, 130.66, 128.83, 128.45, 127.01, 126.29 (q,  $J = 30.9$  Hz), 126.27, 124.06 (q,  $J = 274.7$  Hz), 120.63 (q,

$J = 1.5$  Hz), 111.50 (q,  $J = 4.3$  Hz), 61.98, 28.21, 21.97, 13.86.  $^{19}\text{F}$  NMR (377 MHz, DMSO)  $\delta$  -58.01. HRMS (ESI): calcd for  $\text{C}_{18}\text{H}_{14}\text{F}_3\text{O}_3$  [ $\text{M} - \text{H}$ ]: 335.0901; found 335.0899.

### Dimethyl

**(6b*S*,8a*S*,13a*S*,13b*S*)-9-hydroxy-4-methoxy-8a-methyl-2,6b,7,8,8a,13,13a,13b-octahydro-1*H*-indeno[2,1-*a*]phenanthrene-11,12-dicarboxylate (11e):** The title compound was prepared

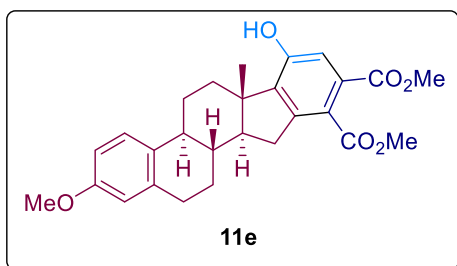

according to the condition A. Light yellow solid (34.0 mg, 76%; eluent: 15%-30% ethyl acetate/hexane). **m.p.** = 208-209 °C.  $^1\text{H}$  NMR (400 MHz,  $\text{CDCl}_3$ )  $\delta$  7.11 (d,  $J = 8.6$  Hz, 1H), 7.04 (s, 1H), 6.72 (s, 1H), 6.63 (dd,  $J = 8.6, 2.7$  Hz, 1H), 6.56 (d,  $J = 2.6$  Hz, 1H), 3.80 (s, 3H), 3.77 (s, 3H), 3.69 (s, 3H), 2.90 – 2.79 (m, 2H), 2.59 – 2.48 (m, 2H), 2.36 – 2.15 (m,

2H), 1.95 – 1.86 (m, 1H), 1.76 (qd,  $J = 12.4, 5.2$  Hz, 2H), 1.66 – 1.53 (m, 2H), 1.46 – 1.33 (m, 1H), 0.91 (s, 3H), 0.83 – 0.73 (m, 1H).  $^{13}\text{C}$  NMR (101 MHz,  $\text{CDCl}_3$ )  $\delta$  169.45, 168.01, 157.49, 153.53, 145.24, 143.27, 137.85, 132.62, 129.43, 126.12, 122.57, 115.93, 113.88, 111.57, 55.83, 55.26, 52.69, 52.49, 46.28, 44.03, 37.38, 35.43, 31.72, 27.73, 29.68, 26.53, 16.56. HRMS (ESI): calcd for  $\text{C}_{27}\text{H}_{29}\text{O}_6$  [ $\text{M} - \text{H}$ ]: 449.1970; found 449.1967.

### Dimethyl

**(3*S*,3a*S*,5a*S*,5b*R*,13a*R*,13b*S*)-3-acetoxy-8-hydroxy-3a,5b-dimethyl-2,3,3a,4,5,5a,5b,6,7,13,13a,13b-dodecahydro-1*H*-cyclopenta[*a*]chrysene-10,11-dicarboxylate (11f):** The title compound

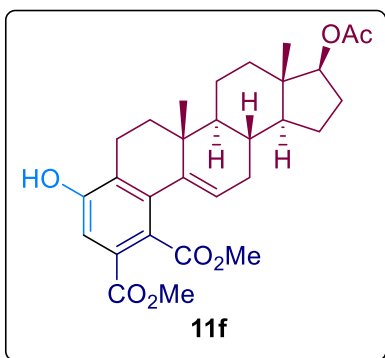

was prepared according to the condition A. Light yellow solid (23.1 mg, 47%; eluent: 15%-30% ethyl acetate/hexane). **m.p.** = 193-194 °C.  $^1\text{H}$  NMR (400 MHz,  $\text{CDCl}_3$ )  $\delta$  7.25 (s, 1H), 6.36 (s, 1H), 5.84 (dd,  $J = 5.5, 2.2$  Hz, 1H), 4.66 – 4.60 (m, 1H), 3.84 (s, 3H), 3.82 (s, 3H), 2.70 (dt,  $J = 16.9, 7.1$  Hz, 1H), 2.54 (dt,  $J = 17.0, 6.3$  Hz, 1H), 2.15 (ddd,  $J = 18.0, 10.5, 6.1$  Hz, 2H), 2.07 (s, 3H), 1.84 – 1.78 (m, 2H), 1.73 (t,  $J = 6.7$  Hz, 2H), 1.70 – 1.48 (m, 6H), 1.41 – 1.32 (m, 1H), 1.14 – 1.03 (m, 2H), 0.93 (s, 3H), 0.83 (s, 3H).  $^{13}\text{C}$  NMR

(101 MHz,  $\text{CDCl}_3$ )  $\delta$  171.62, 170.80, 166.72, 152.66, 140.18, 138.65, 129.63, 127.25, 126.51,

125.36, 114.27, 82.86, 52.49, 52.28, 51.07, 48.84, 42.49, 36.89, 35.22, 32.32, 31.50, 27.57, 23.48, 21.30, 21.24, 20.91, 20.80, 12.05. HRMS (ESI): calcd for C<sub>29</sub>H<sub>35</sub>O<sub>7</sub> [M - H]<sup>-</sup>: 495.2389; found 495.2386.

#### Dimethyl

**(3*S*,3*aS*,5*aS*,5*bR*,13*aS*,13*bS*)-3-acetyl-8-hydroxy-3*a*,5*b*-dimethyl-2,3,3*a*,4,5,5*a*,5*b*,6,7,13,13*a*,13*b*-dodecahydro-1*H*-cyclopenta[*a*]chrysene-10,11-dicarboxylate (11g):** The title compound

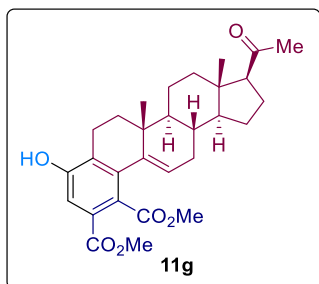

was prepared according to the condition A. Light yellow solid (27.5 mg, 57%; eluent: 15%-30% ethyl acetate/hexane). **m.p.** = 184-185 °C. <sup>1</sup>H NMR (400 MHz, CDCl<sub>3</sub>) δ 7.19 (s, 1H), 5.78 (dd, *J* = 5.5, 2.3 Hz, 1H), 3.76 (s, 3H), 3.76 (s, 3H), 2.64 (dt, *J* = 17.0, 7.2 Hz, 1H), 2.49 (dt, *J* = 17.0, 6.2 Hz, 2H), 2.19 – 2.10 (m, 1H), 2.08 (s, 3H), 2.03 (ddd, *J* = 18.0, 8.6, 5.5 Hz, 2H), 1.70 – 1.36 (m, 10H), 1.16 – 1.01 (m, 3H), 0.85 (s, 3H), 0.59 (s, 3H). <sup>13</sup>C NMR (101 MHz, CDCl<sub>3</sub>) δ 210.22, 170.88, 166.76, 152.76, 140.12, 138.54, 129.59,

127.26, 126.44, 125.43, 114.25, 63.69, 56.88, 52.50, 52.33, 48.77, 44.15, 38.91, 36.86, 35.25, 32.65, 31.65, 31.56, 24.38, 22.91, 21.80, 20.80, 13.33. HRMS (ESI): calcd for C<sub>29</sub>H<sub>35</sub>O<sub>6</sub> [M - H]<sup>-</sup>: 479.2440; found 479.2437.

#### Dimethyl

**(3*R*,3*aR*,5*aS*,5*bR*,13*aS*,13*bS*)-8-hydroxy-3*a*,5*b*-dimethyl-3-((*R*)-6-methylheptan-2-yl)-2,3,3*a*,4,5,5*a*,5*b*,6,7,13,13*a*,13*b*-dodecahydro-1*H*-cyclopenta[*a*]chrysene-10,11-dicarboxylate (11h):**

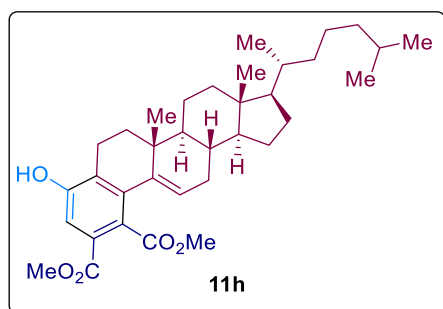

The title compound was prepared according to the condition A. Brown solid (23.8 mg, 43%; eluent: 15%-30% ethyl acetate/hexane). **m.p.** = 92-93 °C. <sup>1</sup>H NMR (400 MHz, CDCl<sub>3</sub>) δ 7.15 (s, 1H), 6.43 (s, 1H), 5.76 (dd, *J* = 5.4, 2.2 Hz, 1H), 3.75 (s, 3H), 3.74 (s, 3H), 2.60 (dt, *J* = 16.9, 7.1 Hz, 1H), 2.45 (dt, *J* = 17.0, 6.2 Hz, 1H), 2.05 (dt, *J* = 18.4, 5.3 Hz, 1H), 2.01 – 1.93 (m, 1H), 1.83 – 1.71 (m, 1H), 1.63 (t, *J* = 6.7 Hz, 2H), 1.56

– 1.39 (m, 5H), 1.36 – 1.21 (m, 4H), 1.14 – 0.90 (m, 10H), 0.87 – 0.83 (m, 6H), 0.81 (d, *J* = 1.7 Hz, 3H), 0.79 (d, *J* = 1.6 Hz, 3H), 0.63 (s, 3H). <sup>13</sup>C NMR (101 MHz, CDCl<sub>3</sub>) δ 171.16, 166.91, 152.74, 140.13, 138.78, 129.78, 127.13, 126.30, 125.86, 114.24, 56.76, 56.18, 52.50, 52.34, 48.87, 42.42, 39.89, 39.53, 36.82, 36.20, 35.81, 35.20, 32.82, 31.68, 28.29, 28.03, 24.18, 23.88, 22.84, 22.59, 21.81, 20.81, 18.75, 11.96. HRMS (ESI): calcd for C<sub>35</sub>H<sub>49</sub>O<sub>5</sub> [M - H]<sup>-</sup>: 549.3586; found 549.3586.

### Trimethyl

#### (4a*S*,6a*S*,6b*R*,8a*R*,14a*S*,14b*R*,16b*S*)-10-hydroxy-2,2,6a,6b,9,9,14a-heptamethyl-1,3,4,5,6,6a,6b,7,8,8a,9,14,14a,14b,15,16b-hexadecahydrobenzo[*b*]picene-4a,12,13(2*H*)-tricarboxylate (**11i**):

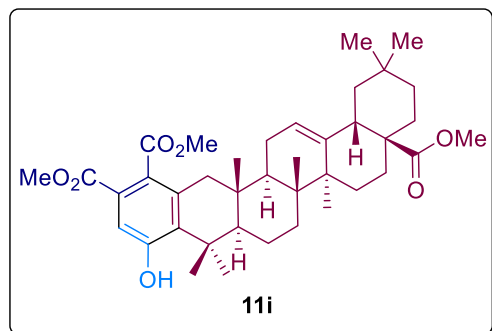

The title compound was prepared according to the condition A. Light yellow solid (31.5 mg, 50%; eluent: 15%-30% ethyl acetate/hexane). **m.p.**= 159-160 °C. <sup>1</sup>H NMR (400 MHz, CDCl<sub>3</sub>) δ 7.18 (s, 1H), 5.27 (t, *J* = 3.3 Hz, 1H), 3.84 (s, 3H), 3.75 (s, 3H), 3.58 (s, 3H), 2.83 (dd, *J* = 13.7, 3.9 Hz, 1H), 2.57 (d, *J* = 16.0 Hz, 1H), 2.21 – 2.14 (m, 1H), 1.98 – 1.83 (m, 3H), 1.70 – 1.40 (m, 10H), 1.33 (s, 3H), 1.29 (s, 3H), 1.24 – 1.12 (m, 5H), 1.08 (s, 3H), 0.86

(s, 3H), 0.84 (s, 3H), 0.77 (s, 3H), 0.72 (s, 3H). <sup>13</sup>C NMR (101 MHz, CDCl<sub>3</sub>) δ 178.92, 171.05, 166.30, 155.51, 143.58, 137.19, 134.69, 128.20, 125.43, 122.48, 115.61, 54.58, 52.58, 52.43, 51.78, 46.97, 45.78, 43.57, 41.90, 41.53, 39.21, 37.24, 35.39, 33.89, 33.11, 32.38, 32.18, 30.70, 28.00, 27.67, 25.70, 23.62, 23.32, 23.14, 20.15, 19.66, 16.54, 15.02. HRMS (ESI): calcd for C<sub>39</sub>H<sub>53</sub>O<sub>7</sub> [M - H]<sup>-</sup>: 633.3798; found 633.3795.

### Ethyl

#### (3*S*,3a*S*,5a*S*,5b*R*,13a*R*,13b*S*)-3-acetoxy-8-hydroxy-3a,5b-dimethyl-10-(trifluoromethyl)-2,3,3a,4,5,5a,5b,6,7,13,13a,13b-dodecahydro-1*H*-cyclopenta[*a*]chrysene-11-carboxylate (**11j**):

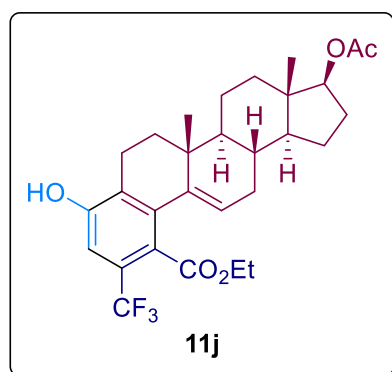

The title compound was prepared according to the condition B. White solid (33.3 mg, 64%; eluent: 15%-30% ethyl acetate/hexane). **m.p.**= 206-207 °C. <sup>1</sup>H NMR (400 MHz, CDCl<sub>3</sub>) δ 6.93 (s, 1H), 5.77 (dd, *J* = 5.3, 2.0 Hz, 1H), 4.55 (t, *J* = 8.4 Hz, 1H), 4.20 (q, *J* = 7.1 Hz, 2H), 2.66 – 2.57 (m, 1H), 2.49 (dt, *J* = 12.2, 5.9 Hz, 1H), 2.18 – 2.04 (m, 2H), 2.00 (s, 3H), 1.79 – 1.36 (m, 10H), 1.35 – 1.26 (m, 1H), 1.24 (t, *J* = 7.1 Hz, 3H), 1.16 (ddd, *J* = 16.4, 9.9, 2.8 Hz, 1H), 1.06 – 0.91 (m, 2H), 0.86 (s, 3H), 0.75 (s, 3H). <sup>13</sup>C

NMR (101 MHz, CDCl<sub>3</sub>) δ 172.06, 169.31, 153.12, 140.53, 139.51, 128.30, 126.36 (q, *J* = 31.7 Hz), 125.94, 123.53 (q, *J* = 274.9 Hz), 123.14 (q, *J* = 1.8 Hz), 110.65 (q, *J* = 4.7 Hz), 83.03, 61.61, 50.96, 48.84, 42.49, 36.83, 36.79, 35.23, 32.21, 31.55, 27.50, 23.47, 21.26, 20.67, 20.57, 13.89, 11.99. <sup>19</sup>F NMR (377 MHz, CDCl<sub>3</sub>) δ -59.22. HRMS (ESI): calcd for C<sub>29</sub>H<sub>34</sub>F<sub>3</sub>O<sub>5</sub> [M - H]<sup>-</sup>: 519.2365; found 519.2361.

## Ethyl

**(3*S*,3*aS*,5*aS*,5*bR*,13*aS*,13*bS*)-3-acetyl-8-hydroxy-3*a*,5*b*-dimethyl-10-(trifluoromethyl)-2,3,3*a*,4,5,5*a*,5*b*,6,7,13,13*a*,13*b*-dodecahydro-1*H*-cyclopenta[*a*]chrysene-11-carboxylate (11k):** The

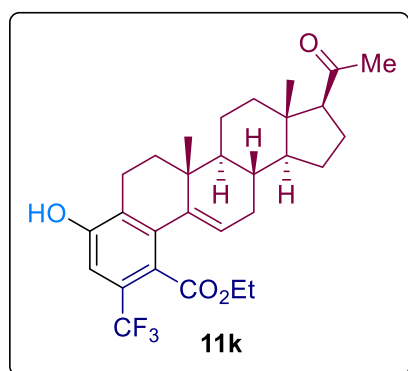

title compound was prepared according to the condition B. White solid (31.8 mg, 63%; eluent: 15%-30% ethyl acetate/hexane). **m.p.** = 186-187 °C. <sup>1</sup>H NMR (400 MHz, DMSO) δ 10.39 (s, 1H), 7.05 (s, 1H), 5.80 – 5.64 (m, 1H), 4.21 – 4.08 (m, 2H), 2.71 – 2.52 (m, 3H), 2.08 (s, 3H), 2.04 (d, *J* = 5.2 Hz, 3H), 1.77 – 1.55 (m, 6H), 1.53 – 1.38 (m, 3H), 1.19 (t, *J* = 6.6 Hz, 3H), 1.17 – 1.00 (m, 3H), 0.84 (s, 3H), 0.57 (s, 3H). <sup>13</sup>C NMR (101 MHz, DMSO) δ 208.85, 168.34, 154.80, 140.67, 139.12, 128.86, 125.66, 125.23 (q, *J* = 30.9 Hz), 124.06 (q, *J* = 274.52 Hz), 122.09

(q, *J* = 1,8 Hz), 110.07 (q, *J* = 5.1 Hz), 62.96, 61.38, 56.31, 48.59, 43.69, 38.41, 36.69, 35.22, 32.40, 31.71, 31.60, 24.40, 22.72, 21.69, 20.77, 14.11, 13.34. <sup>19</sup>F NMR (377 MHz, DMSO) δ -58.10. HRMS (ESI): calcd for C<sub>29</sub>H<sub>34</sub>F<sub>3</sub>O<sub>4</sub> [M - H]<sup>-</sup>: 503.2415; found 503.2413.

## Ethyl

**(3*R*,3*aR*,5*aS*,5*bR*,13*aS*,13*bS*)-8-hydroxy-3*a*,5*b*-dimethyl-3-((*R*)-6-methylheptan-2-yl)-10-(trifluoromethyl)-2,3,3*a*,4,5,5*a*,5*b*,6,7,13,13*a*,13*b*-dodecahydro-1*H*-cyclopenta[*a*]chrysene-11-carboxylate (11l):** The title compound was prepared according to the condition B. Light yellow solid

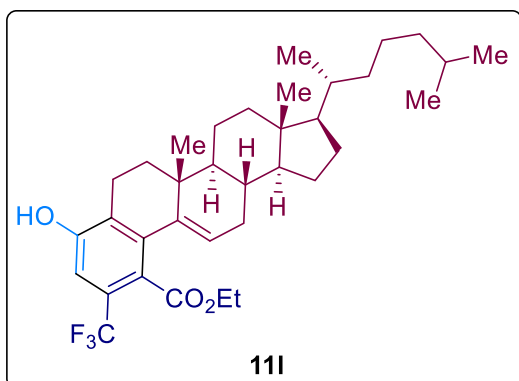

(41.7 mg, 73%; eluent: 15%-30% ethyl acetate/hexane). **m.p.** = 159-160 °C. <sup>1</sup>H NMR (400 MHz, CDCl<sub>3</sub>) δ 6.89 (s, 1H), 6.42 (s, 1H), 5.78 (dd, *J* = 5.3, 2.0 Hz, 1H), 4.20 (q, *J* = 7.1 Hz, 2H), 2.63 – 2.53 (m, 1H), 2.47 (dt, *J* = 17.0, 5.9 Hz, 1H), 2.07 – 1.94 (m, 2H), 1.83 – 1.65 (m, 2H), 1.65 – 1.55 (m, 2H), 1.39 (dddd, *J* = 29.3, 24.2, 13.8, 4.6 Hz, 7H), 1.24 (t, *J* = 7.2 Hz, 3H), 1.20 – 0.88 (m, 11H), 0.85 (d, *J* = 5.4 Hz, 6H), 0.80 (d, *J* = 1.4 Hz, 3H), 0.79 (d, *J* = 1.3 Hz,

3H), 0.61 (s, 3H). <sup>13</sup>C NMR (101 MHz, CDCl<sub>3</sub>) δ 169.73, 152.96, 140.43, 139.68, 128.18, 126.57, 126.49 (q, *J* = 31.6 Hz), 123.49 (q, *J* = 274.8 Hz), 123.12 (q, *J* = 1.9 Hz), 110.59 (q, *J* = 4.9 Hz), 61.78, 56.65, 56.16, 48.91, 42.39, 39.84, 39.53, 36.72, 36.20, 35.81, 35.21, 32.76, 31.76, 28.28, 28.04, 24.20, 23.89, 22.83, 22.58, 21.76, 20.56, 20.50, 18.74, 13.86, 11.91. <sup>19</sup>F NMR (377 MHz, CDCl<sub>3</sub>) δ -59.23. HRMS (ESI): calcd for C<sub>35</sub>H<sub>48</sub>F<sub>3</sub>O<sub>3</sub> [M - H]<sup>-</sup>: 573.3562; found 573.3559.

## VIII. X-ray crystallographic analysis of 7c (CCDC: 2337021) and 11j (CCDC: 2337023)

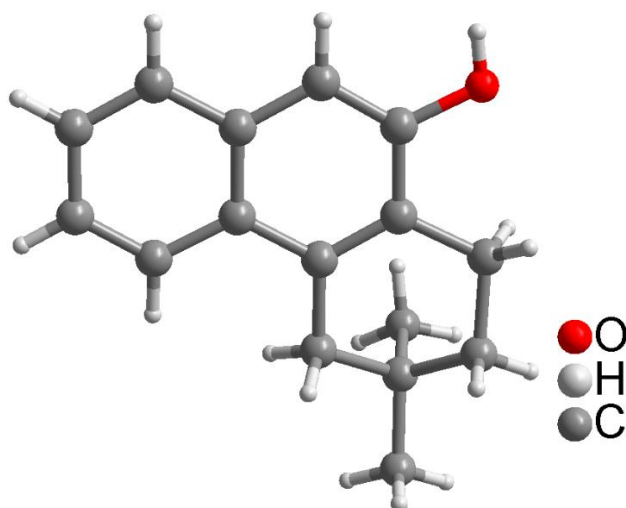

|                                                                                                               |                                                    |
|---------------------------------------------------------------------------------------------------------------|----------------------------------------------------|
| Identification code                                                                                           | <b>7c</b>                                          |
| Empirical formula                                                                                             | C <sub>16</sub> H <sub>18</sub> O                  |
| Formula Mass                                                                                                  | 226.30                                             |
| Temperature / K                                                                                               | 293(2)                                             |
| Wavelength / Å                                                                                                | 1.54184                                            |
| Crystal system                                                                                                | Monoclinic                                         |
| Space group                                                                                                   | <i>P2<sub>1</sub>/c</i>                            |
| <i>a</i> / Å                                                                                                  | 10.3791(2)                                         |
| <i>b</i> / Å                                                                                                  | 18.0337(4)                                         |
| <i>c</i> / Å                                                                                                  | 7.18597(15)                                        |
| $\beta$ / °                                                                                                   | 109.003(2)                                         |
| <i>V</i> / Å <sup>3</sup>                                                                                     | 1271.73(5)                                         |
| <i>Z</i>                                                                                                      | 4                                                  |
| $\mu$ / mm <sup>-1</sup>                                                                                      | 0.552                                              |
| <i>F</i> (000)                                                                                                | 488                                                |
| Crystal size / mm                                                                                             | 0.4 x 0.32 x 0.21                                  |
| Theta range for data collection / °                                                                           | 4.506 to 76.482                                    |
| Index ranges                                                                                                  | -13 ≤ <i>h</i> ≤ 13                                |
|                                                                                                               | -22 ≤ <i>k</i> ≤ 22                                |
|                                                                                                               | -6 ≤ <i>l</i> ≤ 8                                  |
| $\rho_{\text{calcd}}$ / g cm <sup>-3</sup>                                                                    | 1.182                                              |
| Measured refls.                                                                                               | 8018                                               |
| Independent refls.                                                                                            | 2560                                               |
| Completeness to theta = 67.684°                                                                               | 99.8%                                              |
| Absorption correction                                                                                         | Semi-empirical from equivalents                    |
| Ratio of min. to max. transmission                                                                            | 0.87850                                            |
| Refinement method                                                                                             | Full-matrix least-squares on <i>F</i> <sup>2</sup> |
| Data / restraints / parameters                                                                                | 2560/0/158                                         |
| <i>R</i> <sub>int</sub>                                                                                       | 0.0212                                             |
| [ <sup>a</sup> ] <i>R</i> indices [ <i>I</i> > 2σ( <i>I</i> )] <i>R</i> <sub>1</sub> , <i>wR</i> <sub>2</sub> | 0.0412, 0.1213                                     |

|                                                   |                  |
|---------------------------------------------------|------------------|
| $R$ indices (all data) $R_1, wR_2$                | 0.0467, 0.1266   |
| GOF                                               | 1.053            |
| Largest diff. peak and hole / $e.\text{\AA}^{-3}$ | 0.151 and -0.151 |
| CCDC reference numbers                            | 2337021          |

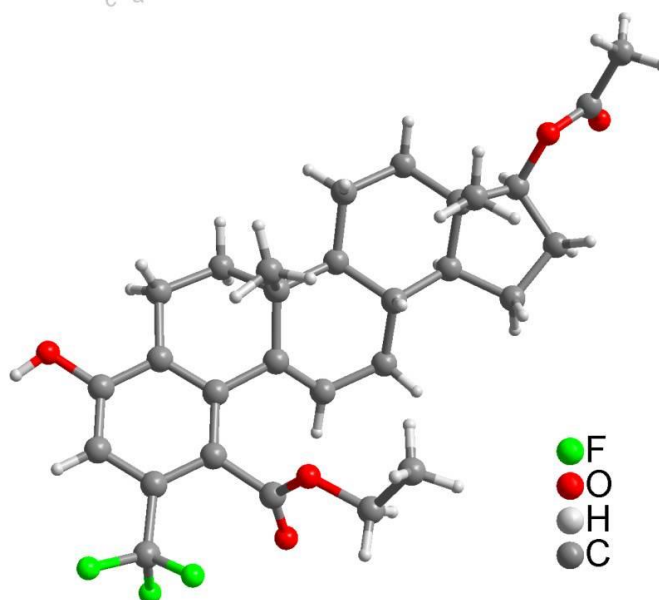

|                                            |                                                                      |
|--------------------------------------------|----------------------------------------------------------------------|
| Identification code                        | <b>11j</b>                                                           |
| Empirical formula                          | $C_{29}H_{35}F_3O_5$                                                 |
| Formula Mass                               | 520.57                                                               |
| Temperature / K                            | 293(2)                                                               |
| Wavelength / $\text{\AA}$                  | 1.54184                                                              |
| Crystal system                             | Orthorhombic                                                         |
| Space group                                | $P2_12_12_1$                                                         |
| $a$ / $\text{\AA}$                         | 10.5004(2)                                                           |
| $b$ / $\text{\AA}$                         | 16.0195(2)                                                           |
| $c$ / $\text{\AA}$                         | 16.1548(3)                                                           |
| $\beta$ / $^\circ$                         | 90                                                                   |
| $V$ / $\text{\AA}^3$                       | 2717.41(9)                                                           |
| $Z$                                        | 4                                                                    |
| $\mu$ / $\text{mm}^{-1}$                   | 0.831                                                                |
| $F(000)$                                   | 1104                                                                 |
| Crystal size / mm                          | 0.4 x 0.35 x 0.2                                                     |
| Theta range for data collection / $^\circ$ | 3.886 to 76.010                                                      |
| Index ranges                               | $-13 \leq h \leq 12$<br>$-19 \leq k \leq 12$<br>$-20 \leq l \leq 20$ |
| $\rho_{\text{calcd}}$ / $\text{g cm}^{-3}$ | 1.272                                                                |
| Measured refls.                            | 10038                                                                |
| Independent refls.                         | 4988                                                                 |

|                                                                |                                    |
|----------------------------------------------------------------|------------------------------------|
| Completeness to theta = 67.684°                                | 99.9 %                             |
| Absorption correction                                          | Semi-empirical from equivalents    |
| Ratio of min. to max. transmission                             | 0.95147                            |
| Refinement method                                              | Full-matrix least-squares on $F^2$ |
| Data / restraints / parameters                                 | 4988/1/340                         |
| $R_{\text{int}}$                                               | 0.0261                             |
| <sup>[a]</sup> $R$ indices [ $I > 2\sigma(I)$ ] $R_1$ , $wR_2$ | 0.0458, 0.1368                     |
| $R$ indices (all data) $R_1$ , $wR_2$                          | 0.0521, 0.1456                     |
| GOF                                                            | 1.062                              |
| Largest diff. peak and hole / e.Å <sup>-3</sup>                | 0.501 and -0.299                   |
| CCDC reference numbers                                         | 2337023                            |

---

## IX. References

- [1] K. Nogi, T. Fujihara, J. Terao, Y. Tsuji, *J. Org. Chem.* **2015**, *80*, 11618-1162.
- [2] Z. Wu, X. Xu, J. Wang, G. Dong, *Science* **2021**, *374*, 734-740.
- [3] T. M. Ross, M. C. Jetter, M. E. McDonnell, R. E. Boyd, C. D. Connelly, R. P. Martinez, M. A. Lewis, E. E. Codd, R. B. Raffa, A. B. Reitz, *J. Med. Chem.* **2000**, *43*, 1423-1426.
- [4] E. Caroff, E. A. Meyer, P. Aanismaa, S. Froidevaux, M. Keller, L. Piali, *J. Med. Chem.* **2022**, *65*, 11533-11549.
- [5] D. J. Lippincott, R. T. H. Linstadt, M. R. Maser, B. H. Lipshutz, *Angew. Chem. Int. Ed.* **2017**, *56*, 847-850; *Angew. Chem.* **2017**, *129*, 865-868.
- [6] J. Duan, Y. Du, X. Pang, X. Shu, *Chem. Sci.*, **2019**, *10*, 8706-8712.
- [7] S. Zhang, H. Neumann, M. Beller, *Org. Lett.* **2019**, *21*, 3528-3532.
- [8] Z. Wu, G. Dong, *Angew. Chem. Int. Ed.* **2022**, *61*, e202201239; *Angew. Chem.* **2022**, *134*, e202201239.
- [9] P. Yu, B. Morandi, *Angew. Chem. Int. Ed.* **2017**, *56*, 15693-15697; *Angew. Chem.* **2017**, *129*, 15899-15903.
- [10] Z. Li, M. Alyamani, J. Li, K. Rogacki, M. Abazeed, S. K. Upadhyay, S. P. Balk, M.-E. Taplin, R. J. Auchus, N. Sharifi, *Nature* **2016**, *533*, 547-551.
- [11] S. Cacchi, G. Fabrizi, A. Goggiamani, *Org. Lett.* **2003**, *23*, 4269-4272.



## X. $^1\text{H}$ , $^{13}\text{C}$ and $^{19}\text{F}$ NMR spectra

$^1\text{H}$  NMR spectra of 3a (400 MHz,  $(\text{CD}_3)_2\text{SO}$ )

[JB-BZL]

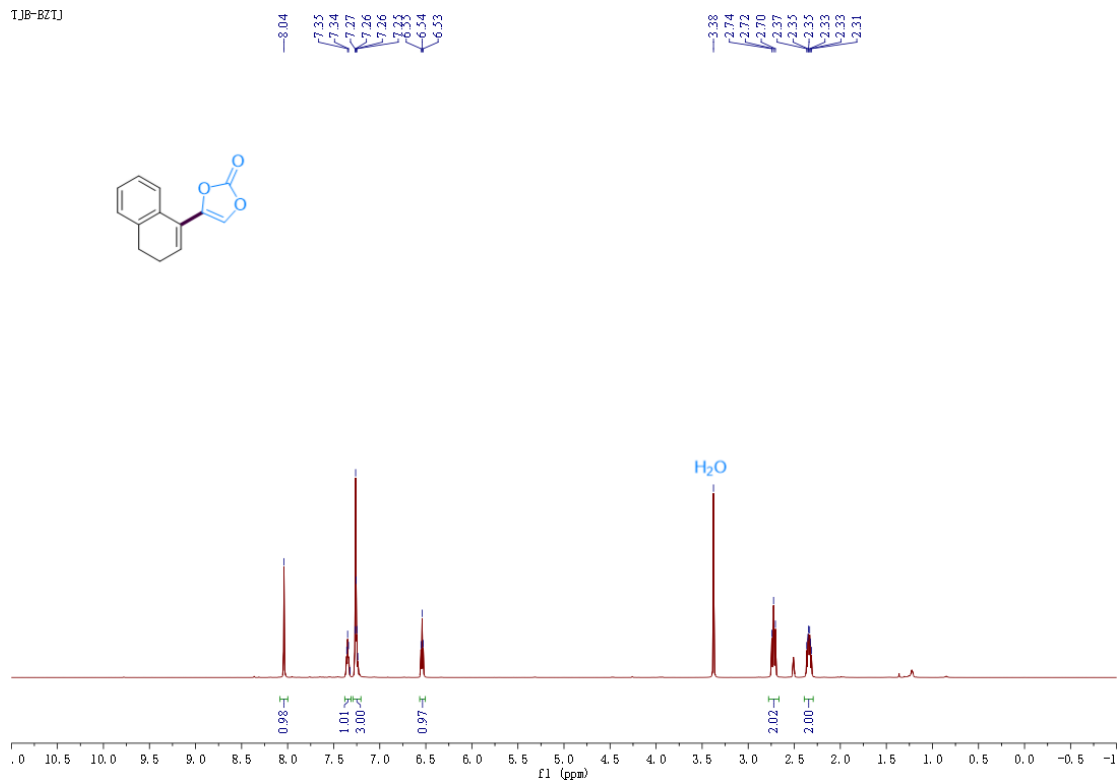

$^{13}\text{C}$  NMR spectra of 3a (101 MHz,  $(\text{CD}_3)_2\text{SO}$ )

[JB-BZL]

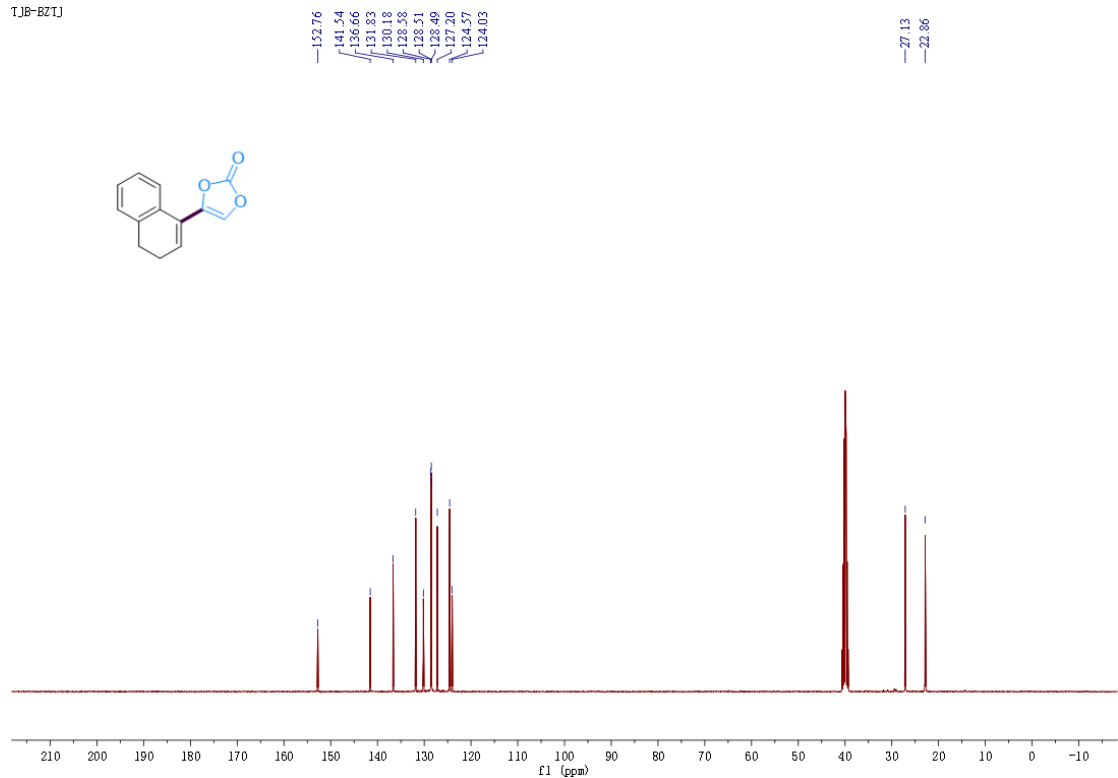

TJB-146

### <sup>1</sup>H NMR spectra of 3b (400 MHz, CDCl<sub>3</sub>)

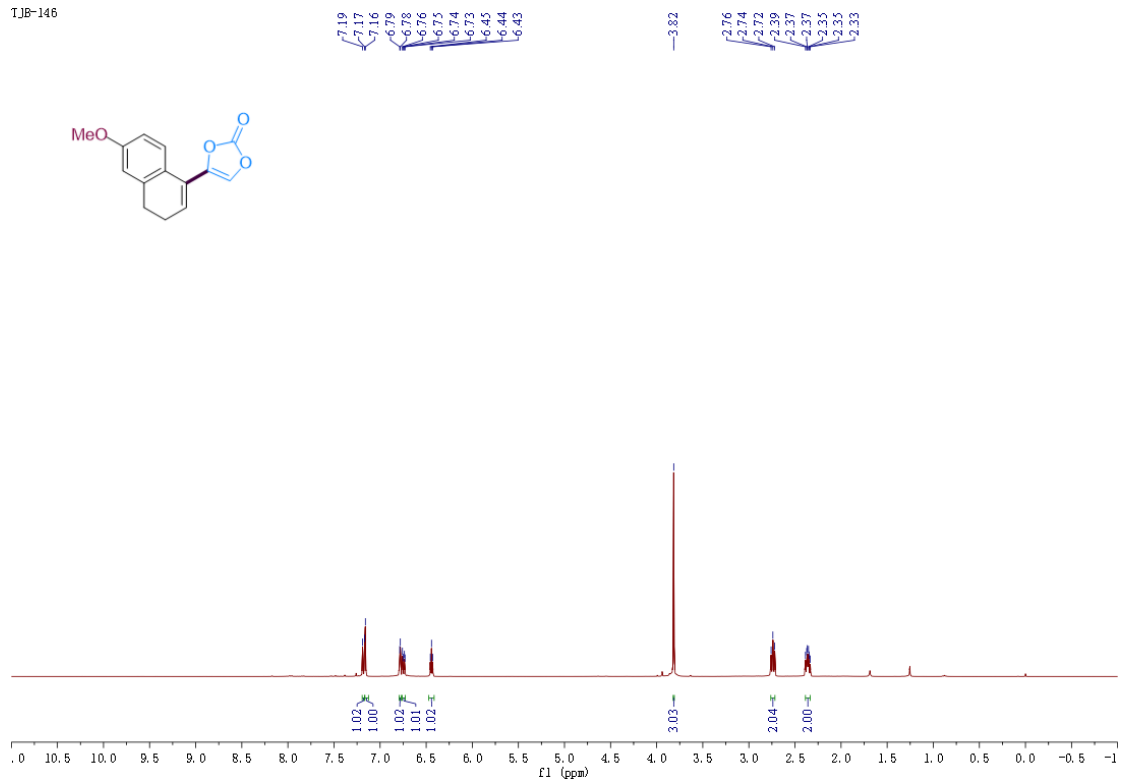

TJB-146

### <sup>13</sup>C NMR spectra of 3b (101 MHz, CDCl<sub>3</sub>)

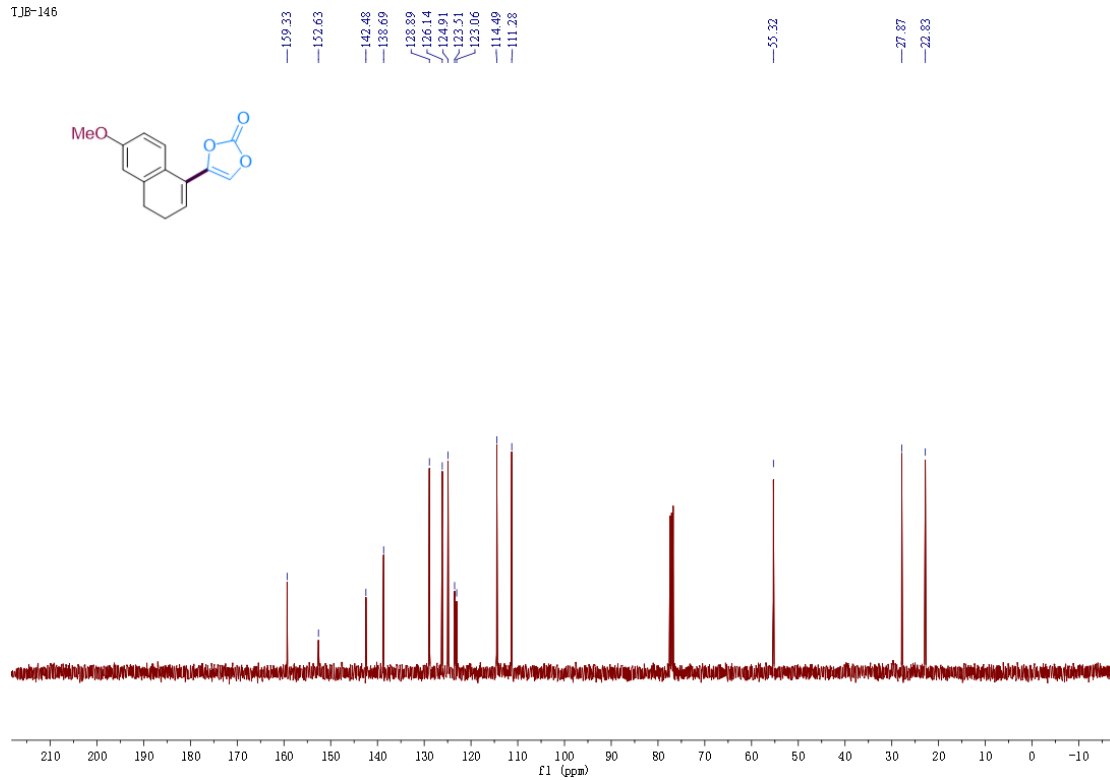

158. 1. 1. 1r

### $^1\text{H}$ NMR spectra of 3c (400 MHz, $(\text{CD}_3)_2\text{SO}$ )

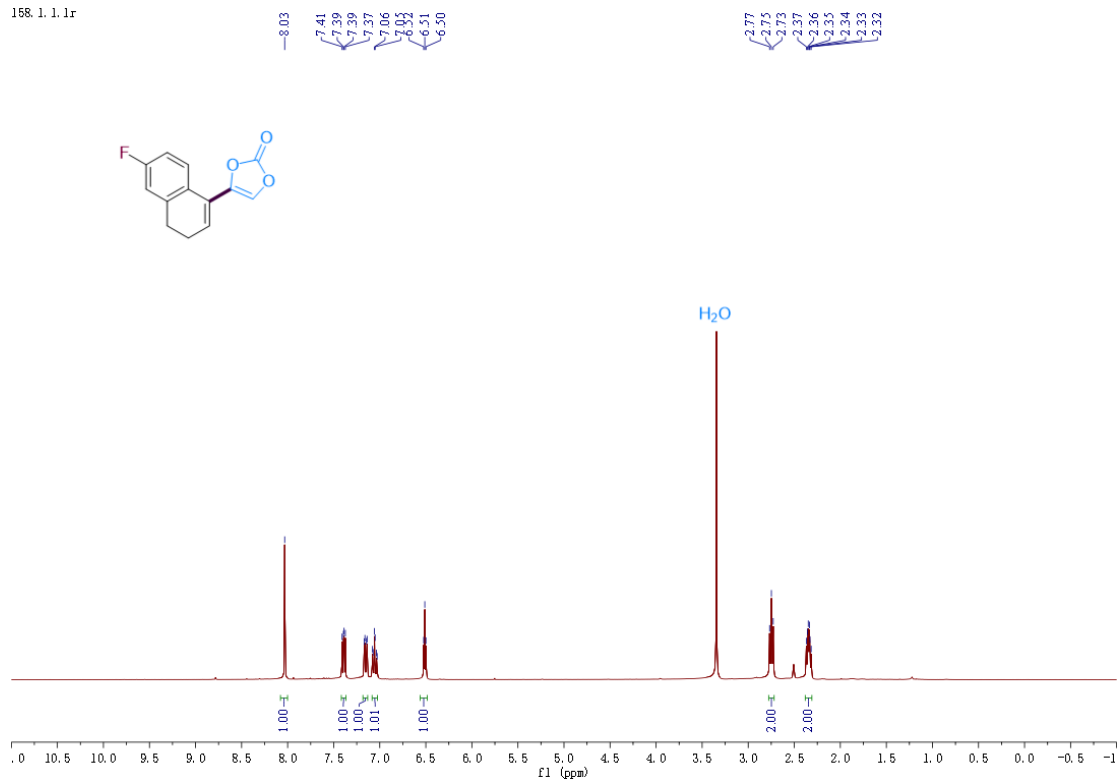

### $^{13}\text{C}$ NMR spectra of 3c (101 MHz, $(\text{CD}_3)_2\text{SO}$ )

TJB-158

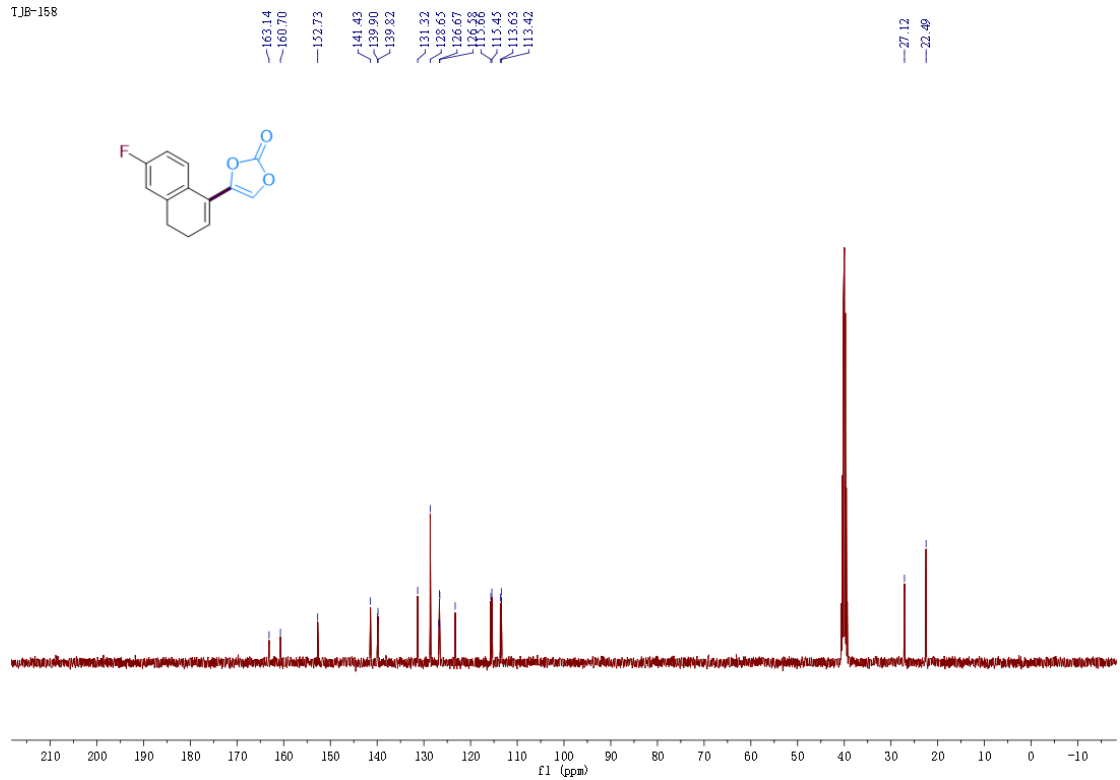

### $^{19}\text{F}$ NMR spectra of 3c (377 MHz, $(\text{CD}_3)_2\text{SO}$ )

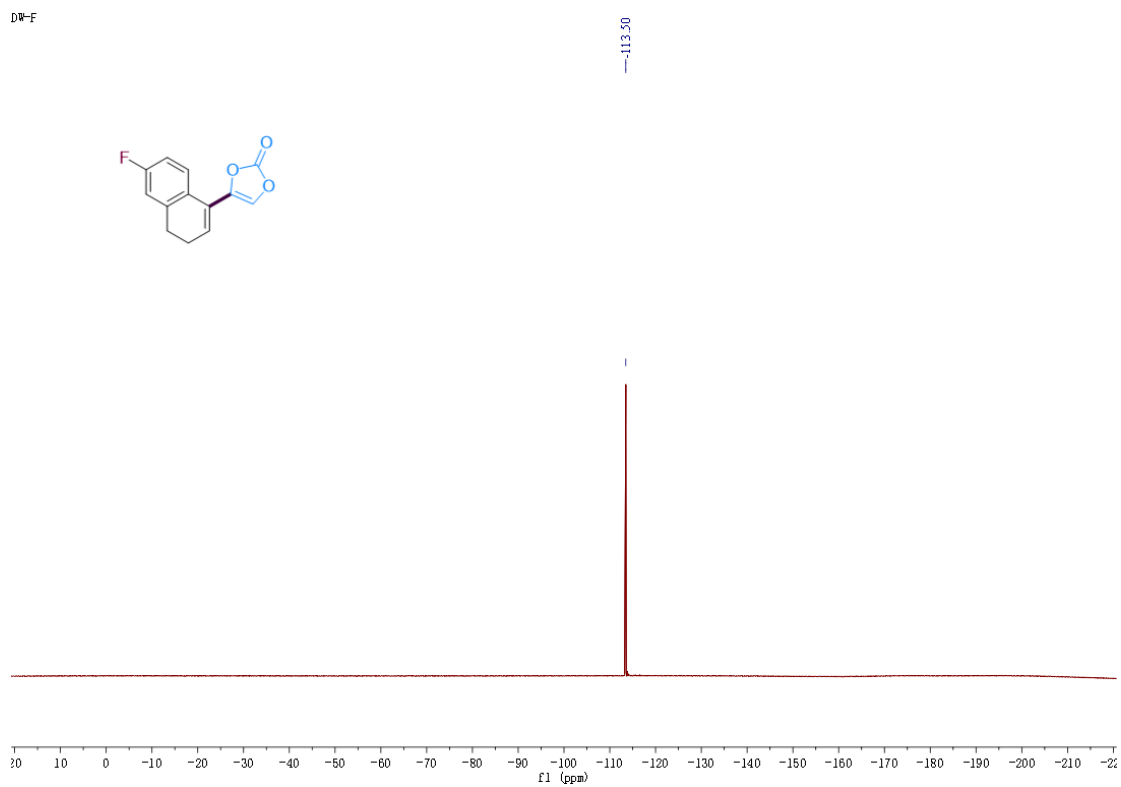

### $^1\text{H}$ NMR spectra of 3d (400 MHz, $(\text{CD}_3)_2\text{SO}$ )

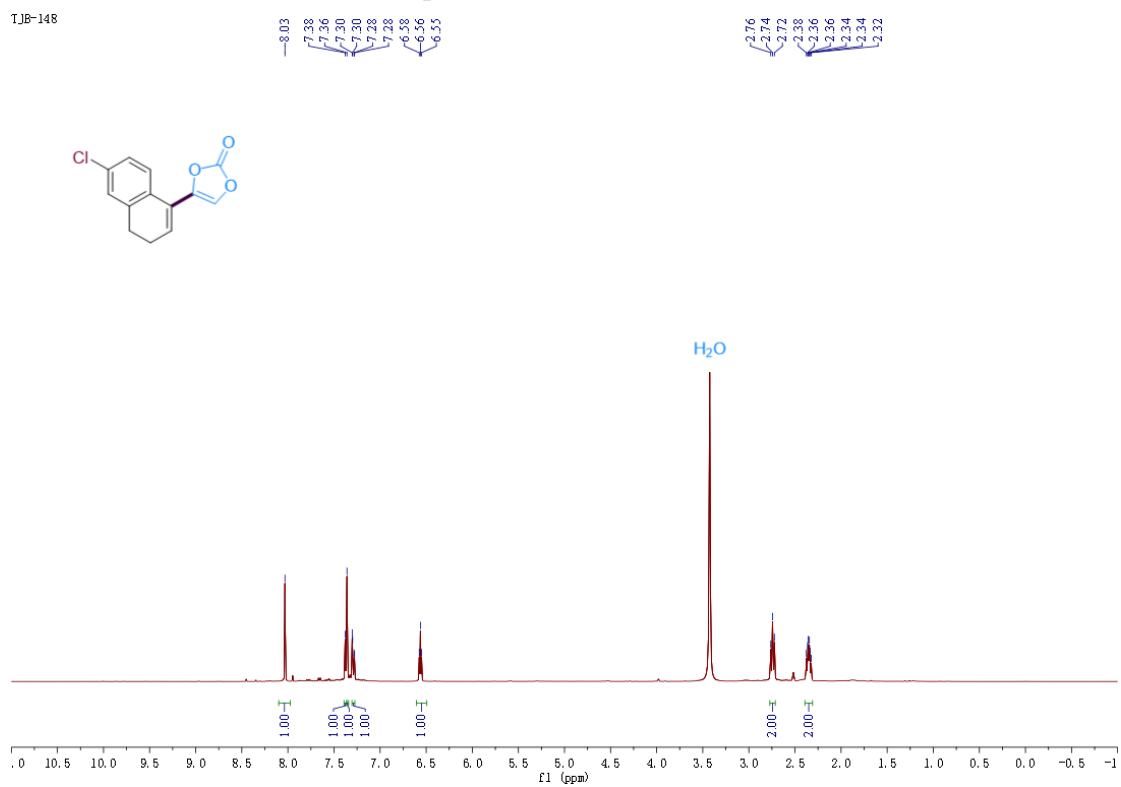

TJB-148

### $^{13}\text{C}$ NMR spectra of 3d (101 MHz, $(\text{CD}_3)_2\text{SO}$ )

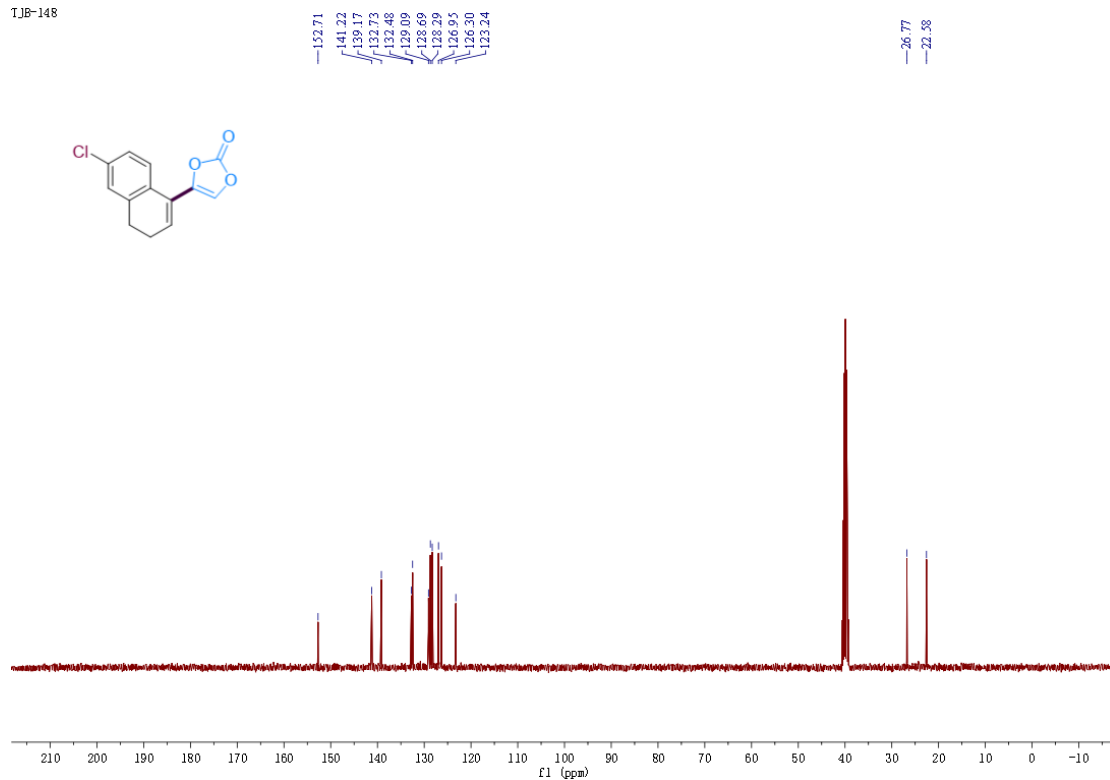

### $^1\text{H}$ NMR spectra of 3e (400 MHz, $(\text{CD}_3)_2\text{SO}$ )

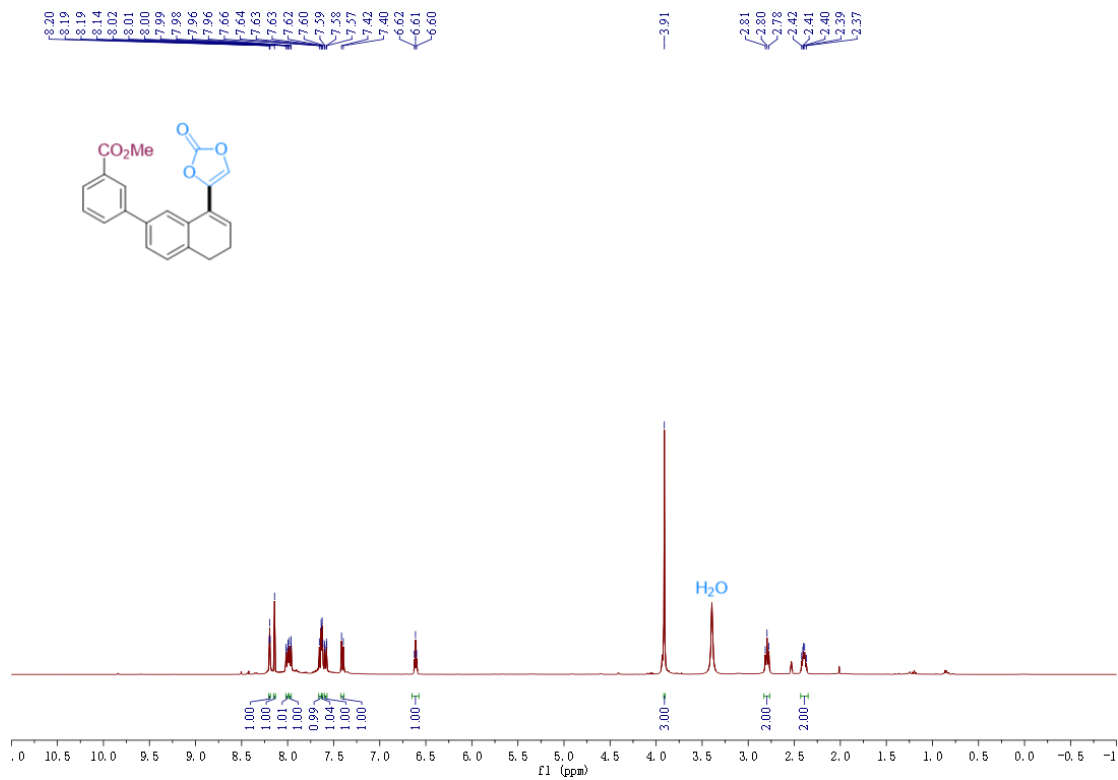

**<sup>13</sup>C NMR spectra of 3e (101 MHz, (CD<sub>3</sub>)<sub>2</sub>SO)**

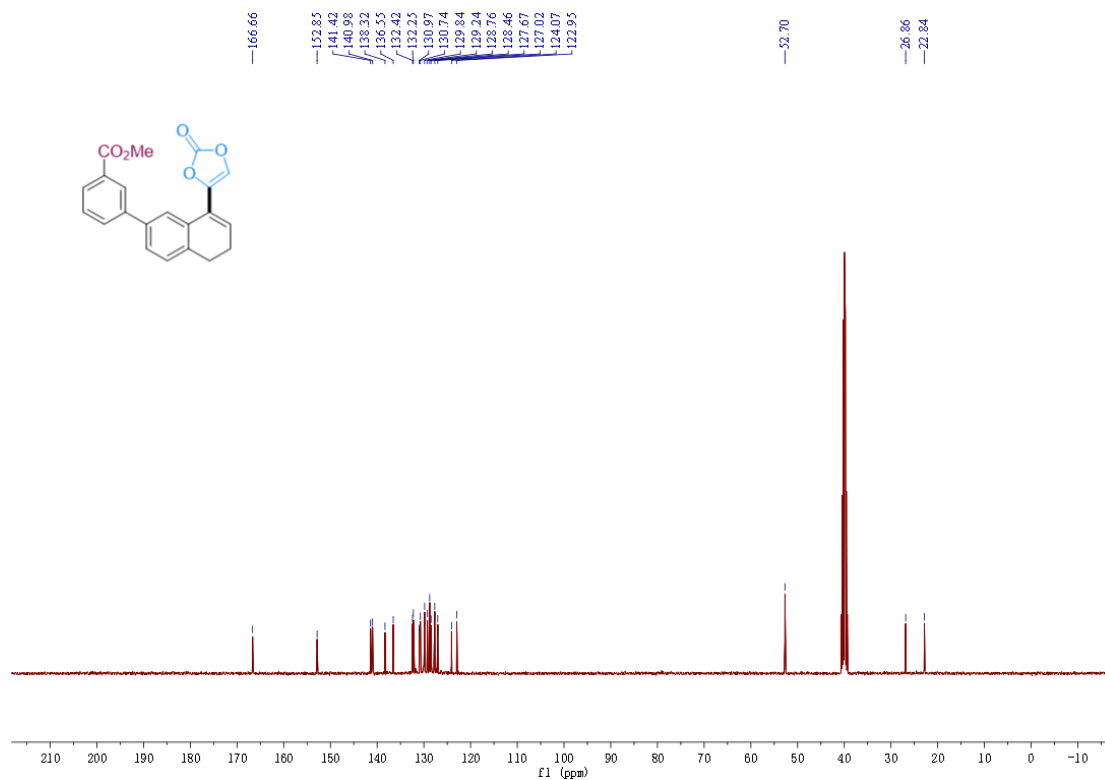

**<sup>1</sup>H NMR spectra of 3f (400 MHz, (CD<sub>3</sub>)<sub>2</sub>SO)**

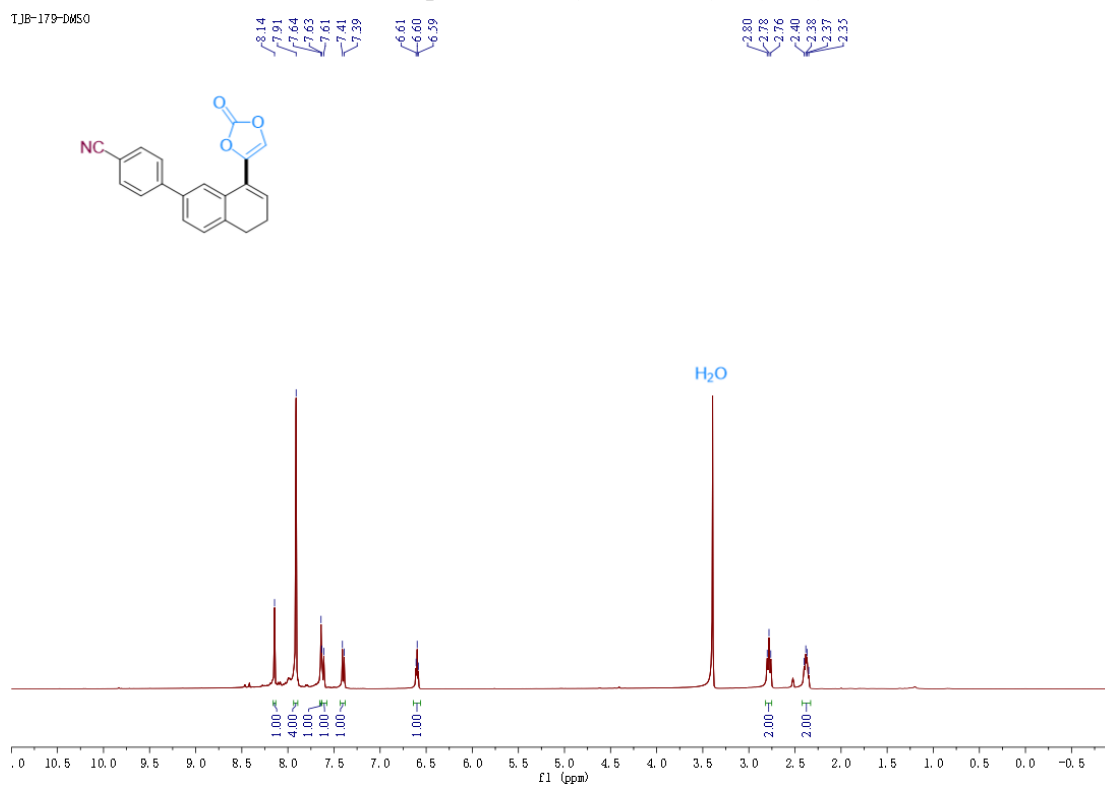

<sup>13</sup>C NMR spectra of 3f (101 MHz, (CD<sub>3</sub>)<sub>2</sub>SO)

TJB-179-DMSO

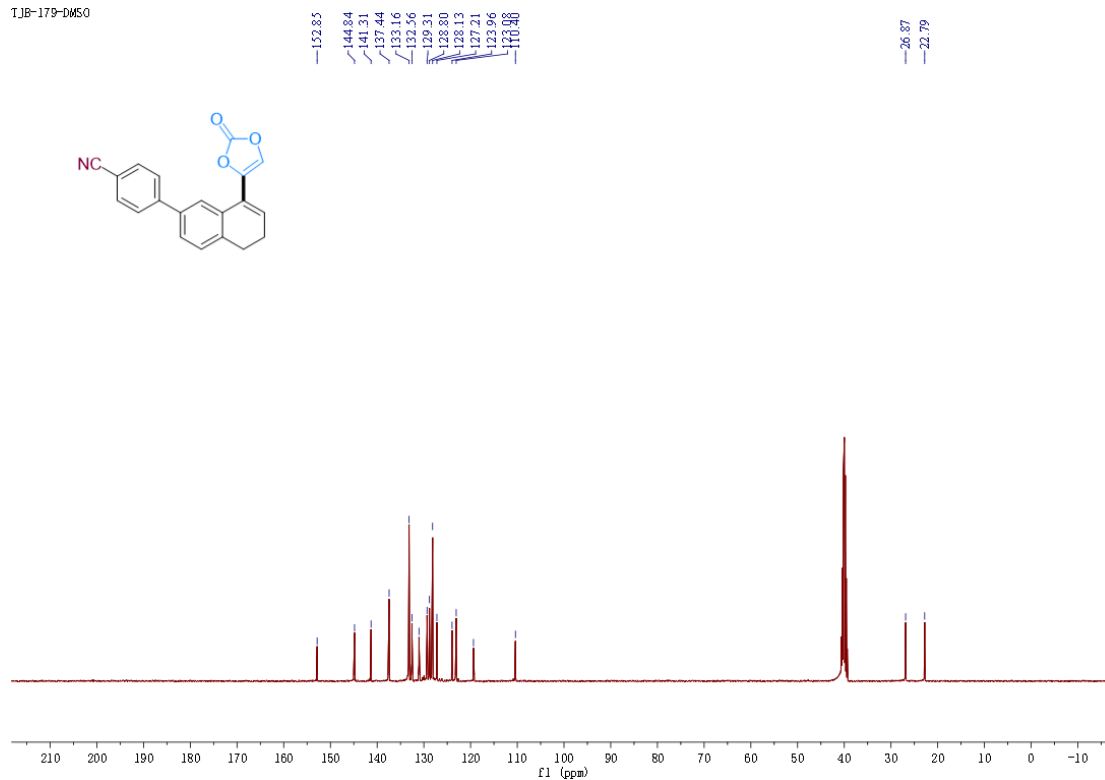

<sup>1</sup>H NMR spectra of 3g (400 MHz, (CD<sub>3</sub>)<sub>2</sub>SO)

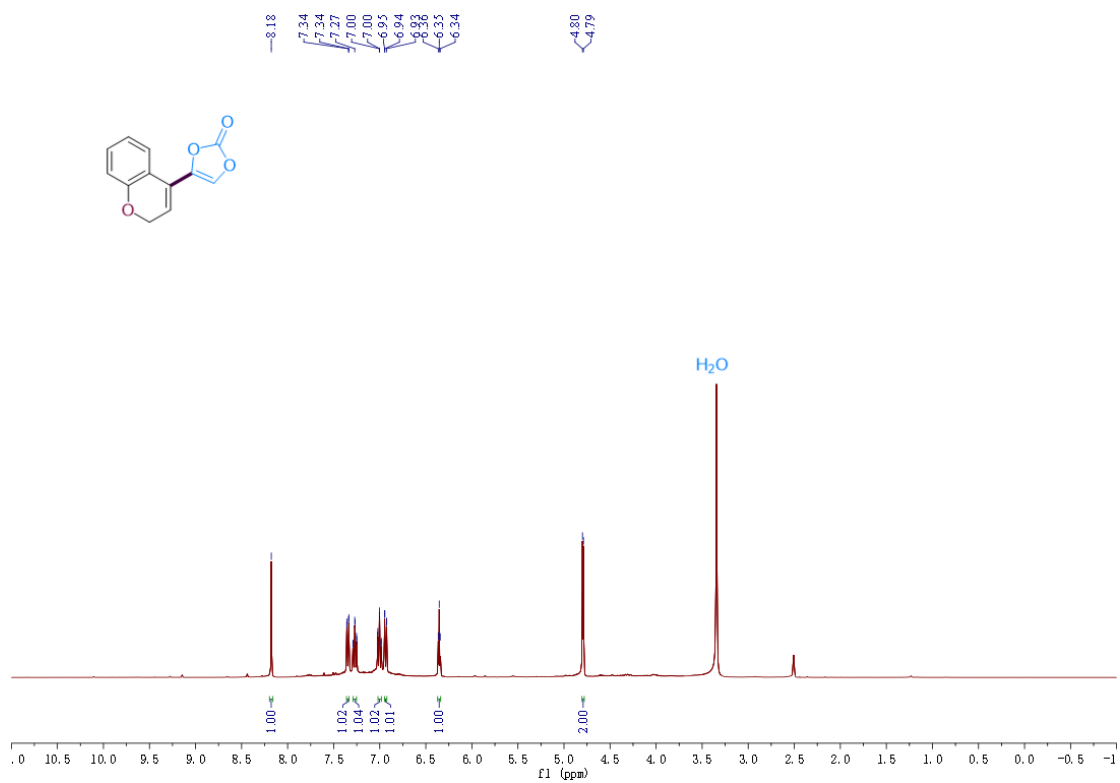

### <sup>13</sup>C NMR spectra of 3g (101 MHz, (CD<sub>3</sub>)<sub>2</sub>SO)

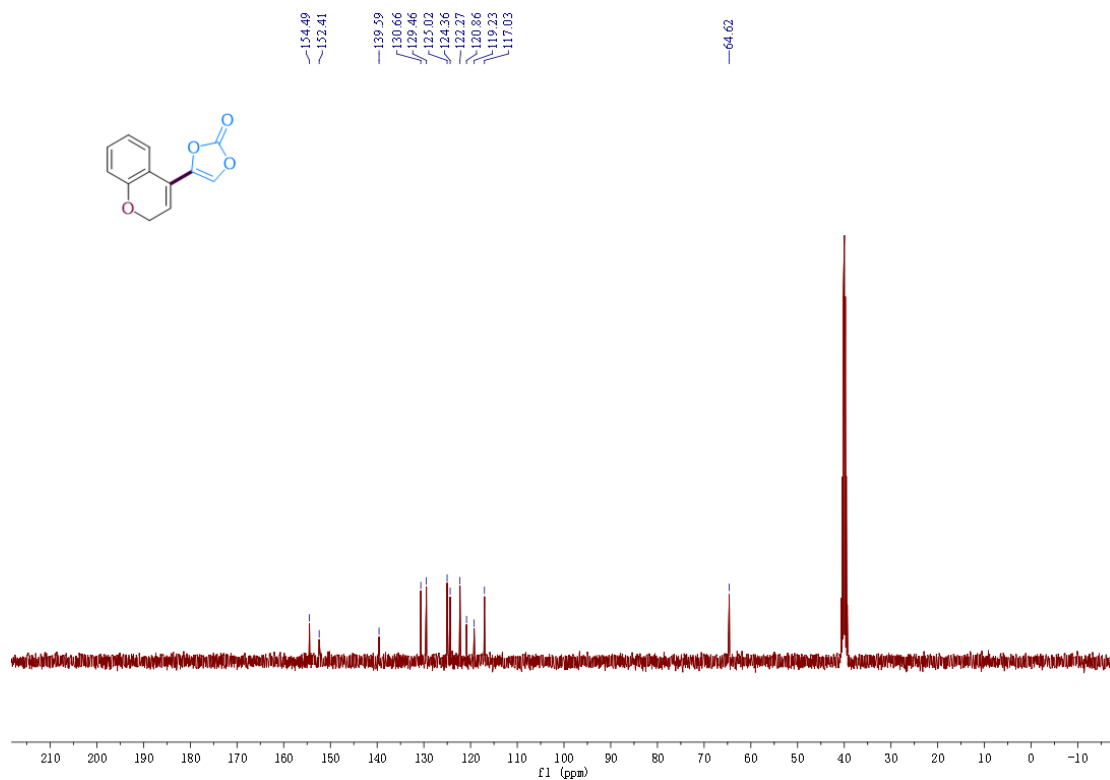

### <sup>1</sup>H NMR spectra of 3h (400 MHz, (CD<sub>3</sub>)<sub>2</sub>SO)

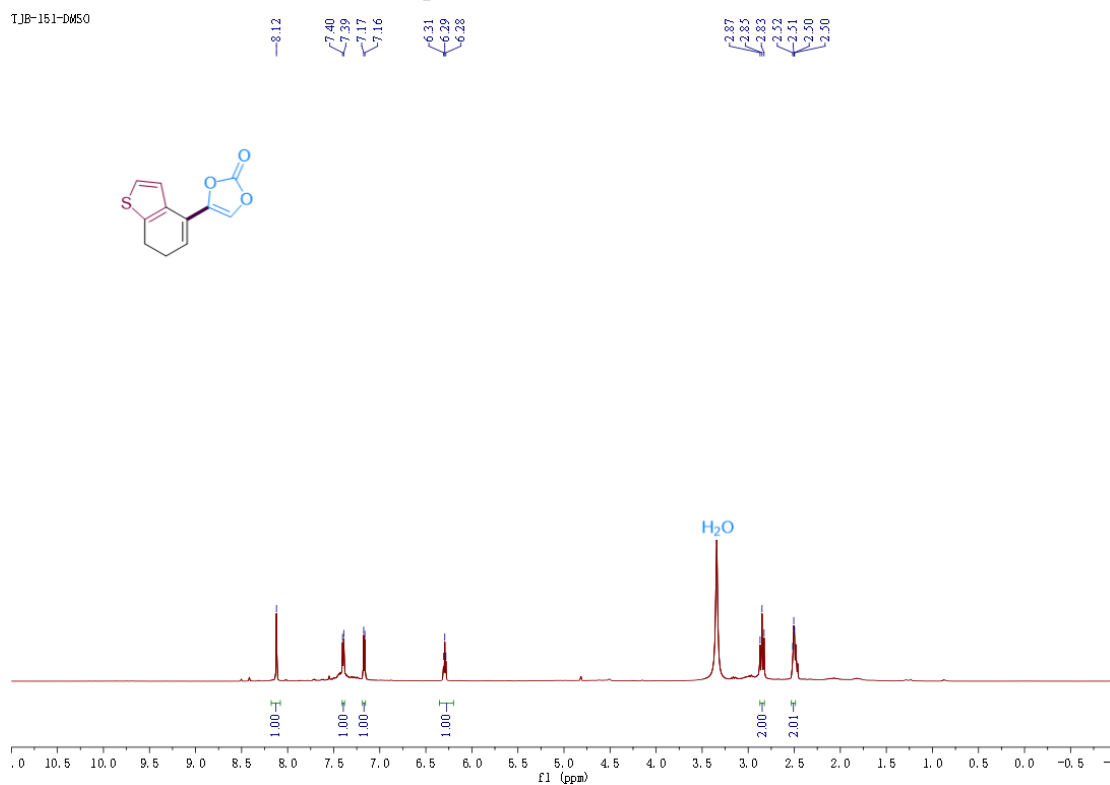



### <sup>13</sup>C NMR spectra of 3h (101 MHz, (CD<sub>3</sub>)<sub>2</sub>SO)

TJB-151-DMSO

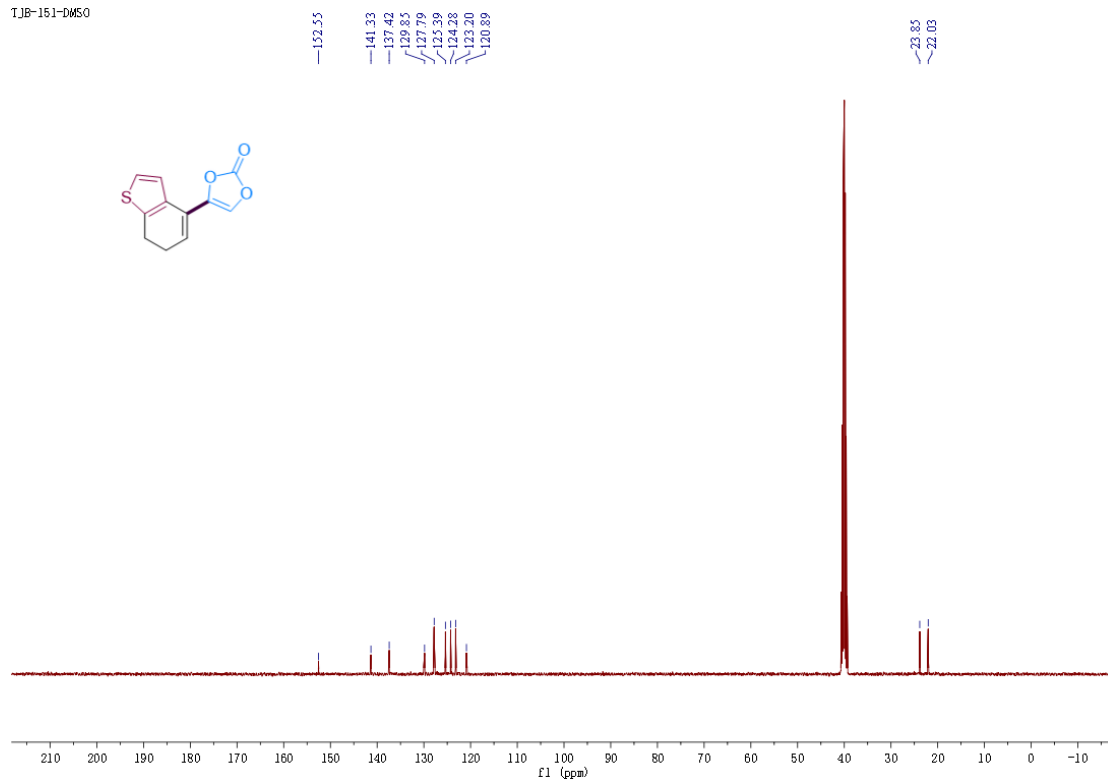

### <sup>1</sup>H NMR spectra of 3i (400 MHz, (CD<sub>3</sub>)<sub>2</sub>SO)

3i-dms o

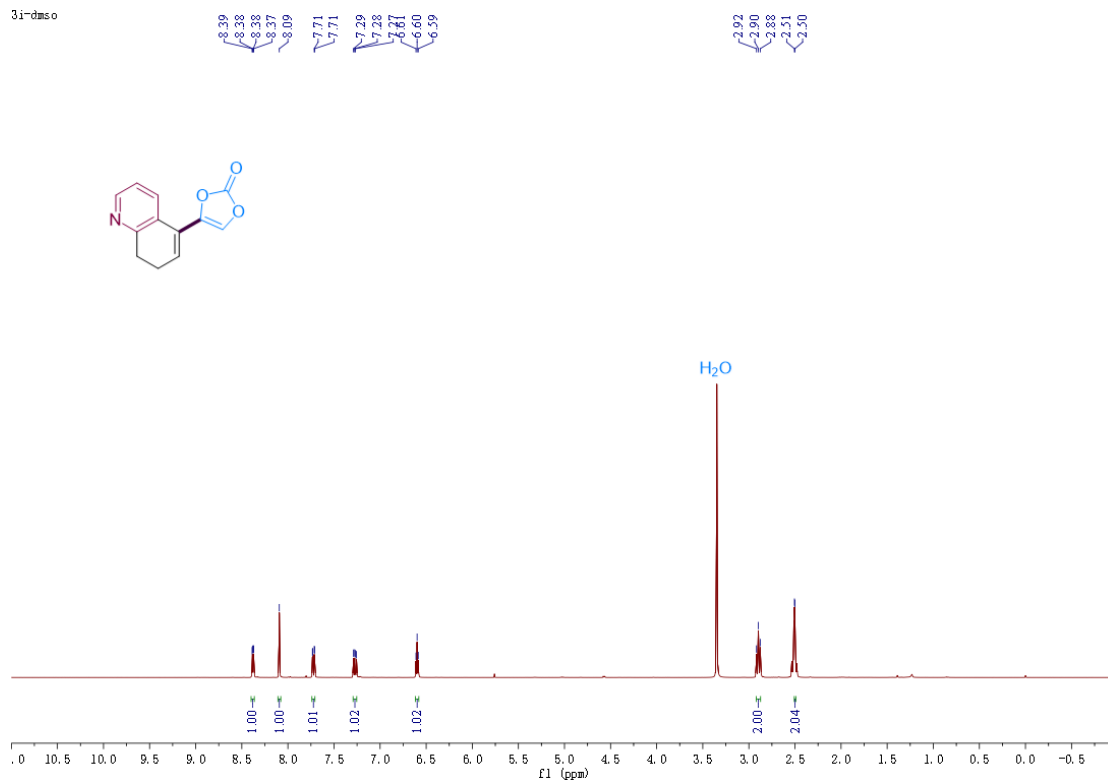

### <sup>13</sup>C NMR spectra of 3i (101 MHz, (CD<sub>3</sub>)<sub>2</sub>SO)

TJB-159

157.08  
152.64  
148.29  
140.81  
132.70  
131.57  
128.76  
125.64  
122.85  
122.50

29.89  
22.80

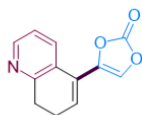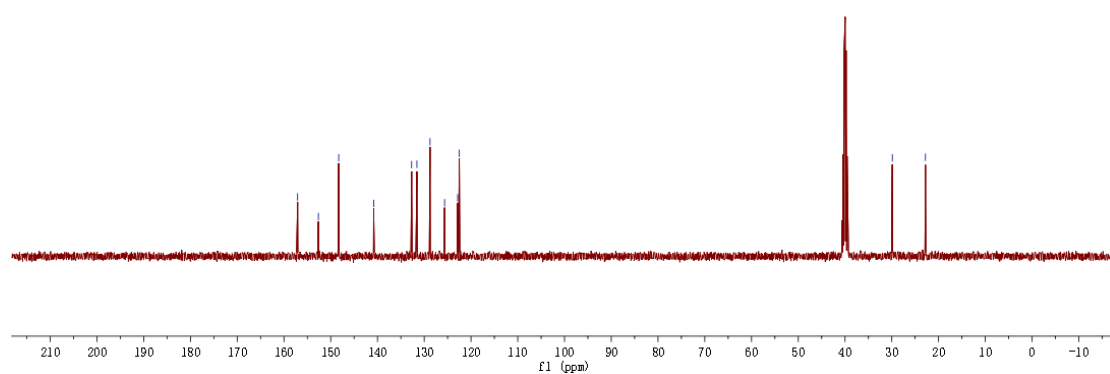

### <sup>1</sup>H NMR spectra of 3j (400 MHz, (CD<sub>3</sub>)<sub>2</sub>SO)

TJB-218-DMSO

8.05  
7.25  
7.25  
7.24  
7.21  
7.19  
6.82

2.86  
2.84  
2.82  
2.41  
2.39  
2.37

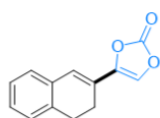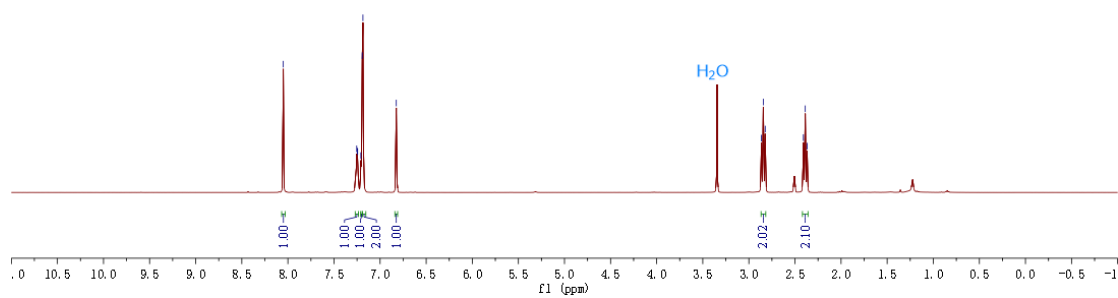

### <sup>13</sup>C NMR spectra of 3j (101 MHz, (CD<sub>3</sub>)<sub>2</sub>SO)

TJB-218-DM50

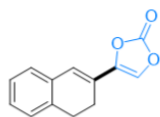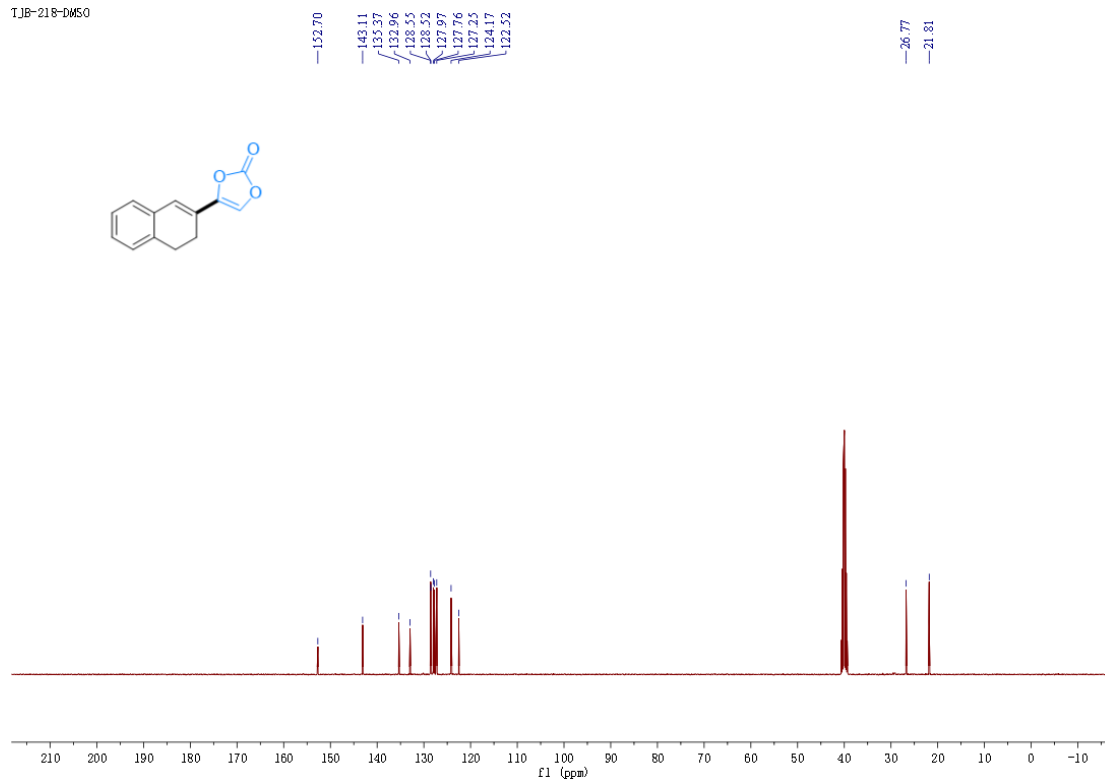

### <sup>1</sup>H NMR spectra of 3k (400 MHz, (CD<sub>3</sub>)<sub>2</sub>SO)

TJB-135-DM50. 2.1.1r

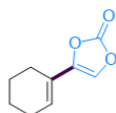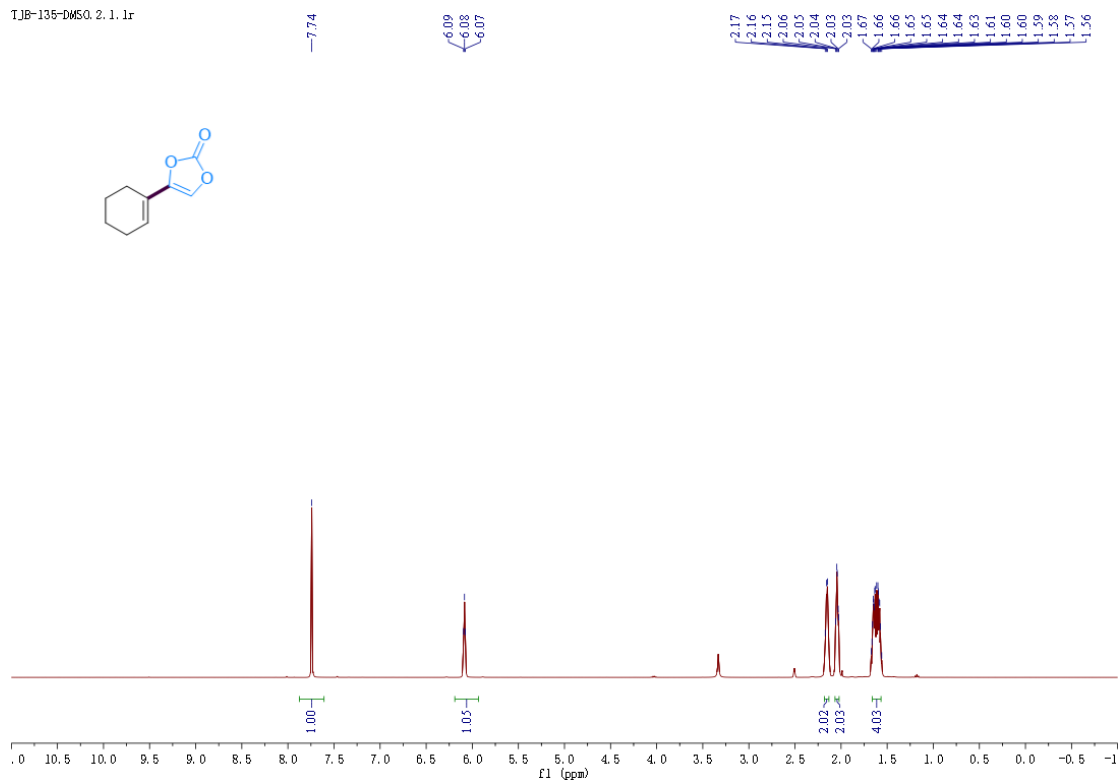

### <sup>13</sup>C NMR spectra of 3k (101 MHz, (CD<sub>3</sub>)<sub>2</sub>SO)

TJB-135-DMSO. 3. 1. 1r

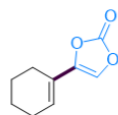

152.86

143.80

126.57

126.11

122.43

24.89

21.69

21.63

21.34

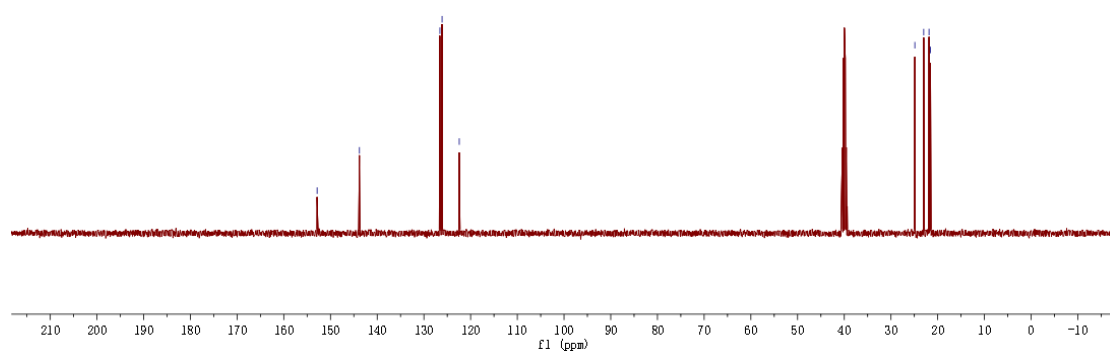

### <sup>1</sup>H NMR spectra of 3l (400 MHz, (CD<sub>3</sub>)<sub>2</sub>SO)

TJB-217-DMSO

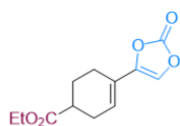

7.77

6.08

6.07

4.11

4.10

4.08

4.06

2.63

2.62

2.62

2.61

2.60

2.60

2.40

2.35

2.34

2.33

2.33

2.32

2.14

2.13

2.02

2.01

2.00

1.99

1.68

1.67

1.67

1.66

1.65

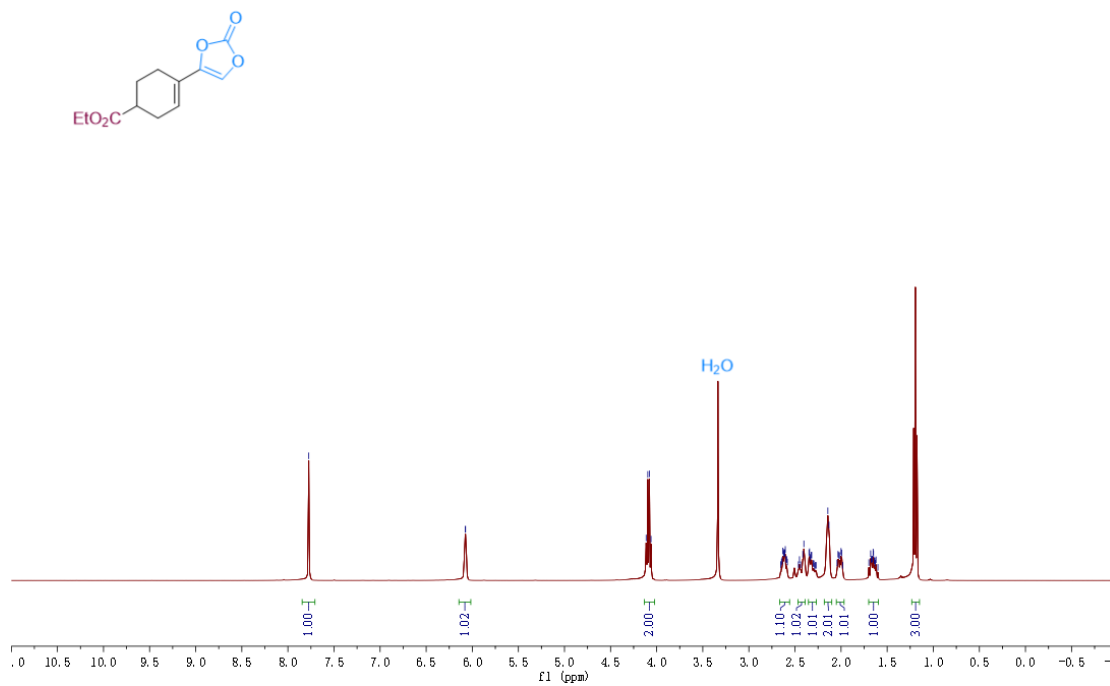

### <sup>13</sup>C NMR spectra of 3l (101 MHz, (CD<sub>3</sub>)<sub>2</sub>SO)

TJB-217-DMSO

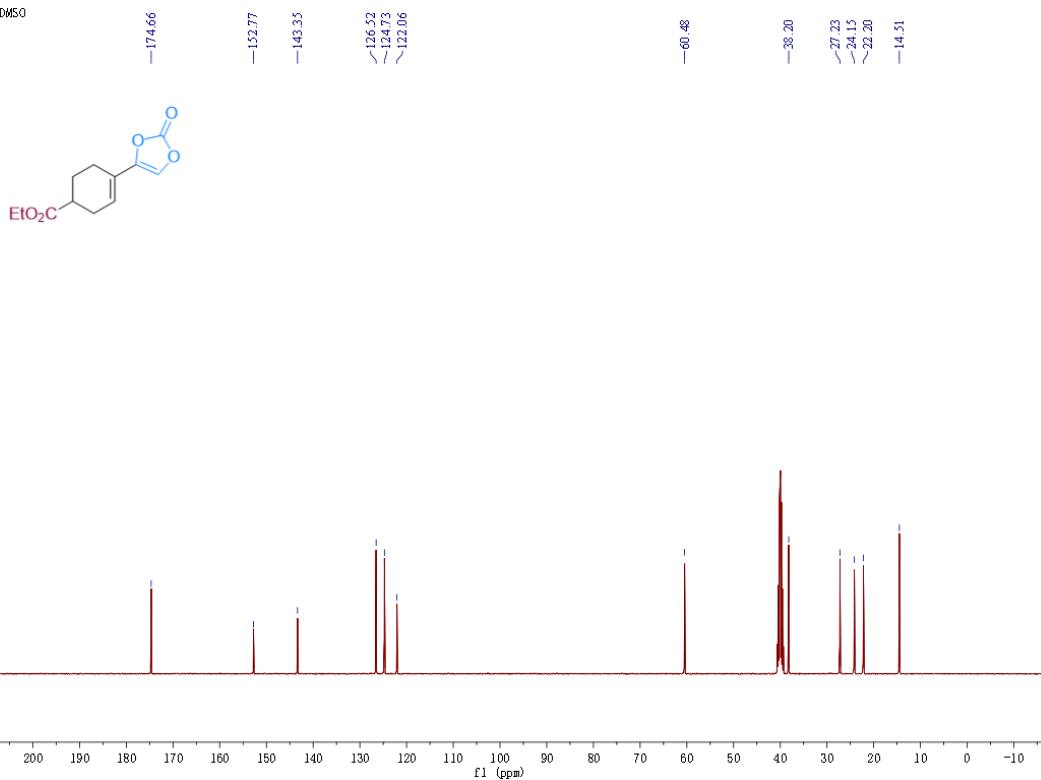

### <sup>1</sup>H NMR spectra of 3m (400 MHz, CDCl<sub>3</sub>)

TJB-129

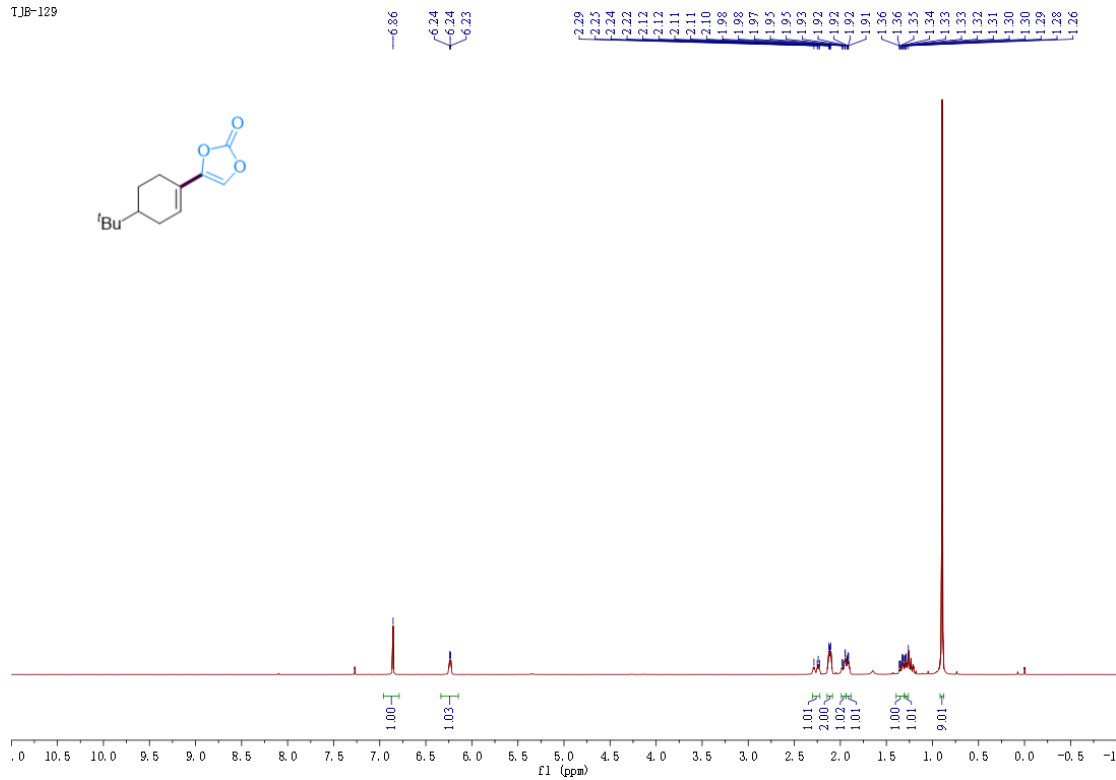

TJB-129-C

### <sup>13</sup>C NMR spectra of 3m (101 MHz, CDCl<sub>3</sub>)

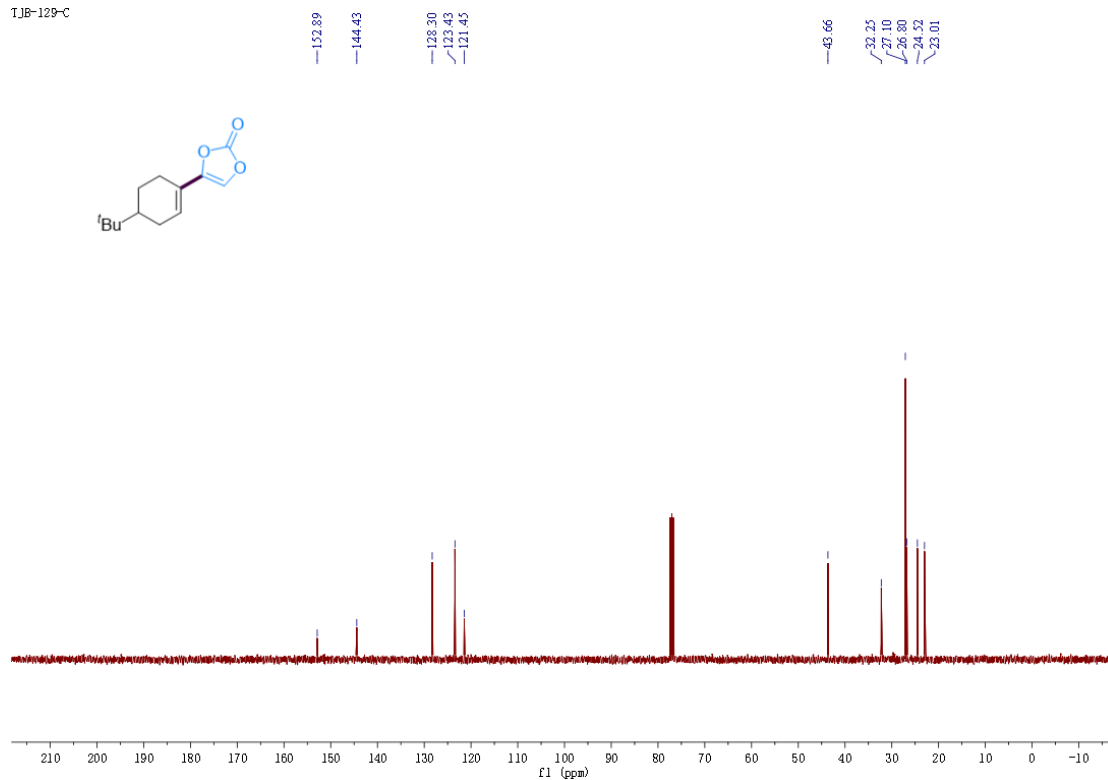

130

### <sup>1</sup>H NMR spectra of 3n (400 MHz, (CD<sub>3</sub>)<sub>2</sub>SO)

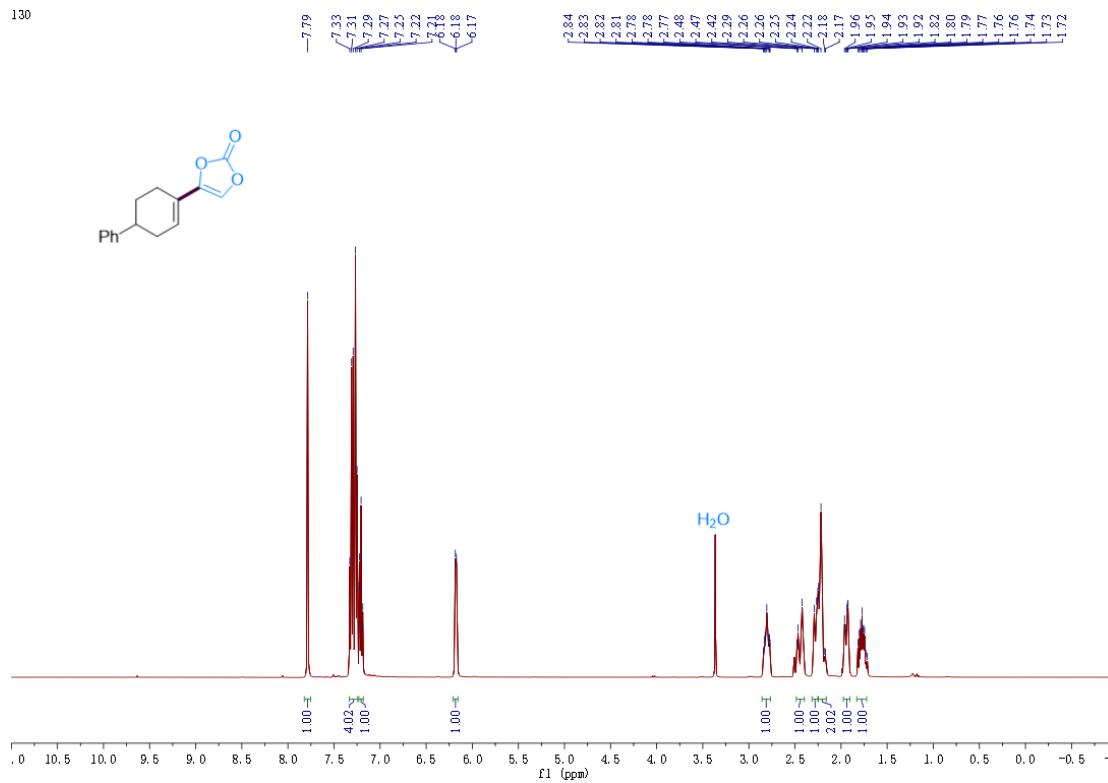

130

 **$^{13}\text{C}$  NMR spectra of 3n (101 MHz,  $(\text{CD}_3)_2\text{SO}$ )**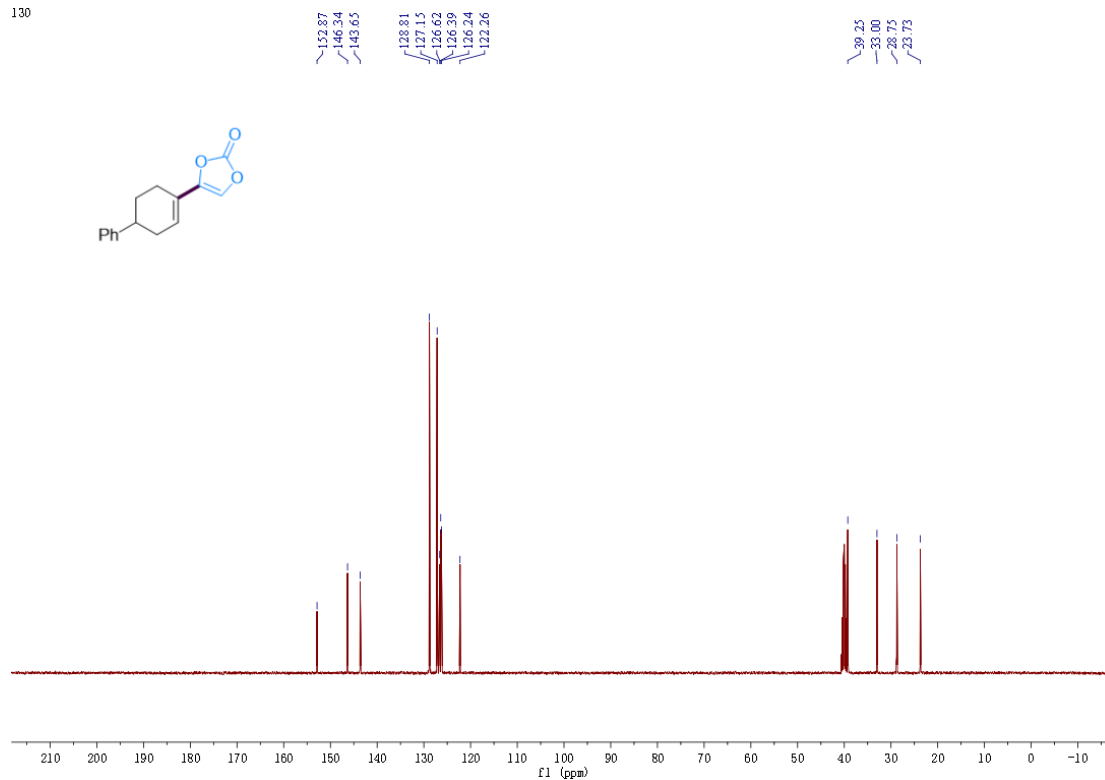 **$^1\text{H}$  NMR spectra of 3o (400 MHz,  $(\text{CD}_3)_2\text{SO}$ )**

TJB-167-DMSO

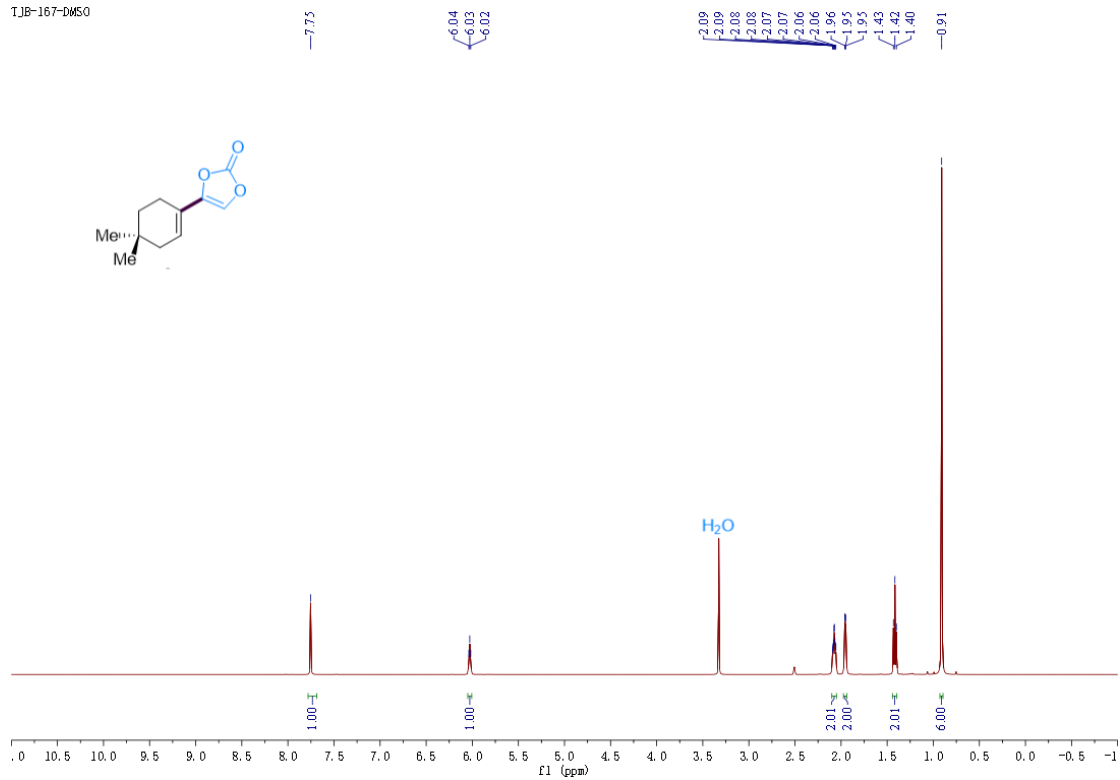

### $^{13}\text{C}$ NMR spectra of 3o (101 MHz, $(\text{CD}_3)_2\text{SO}$ )

TJB-167-DMSO

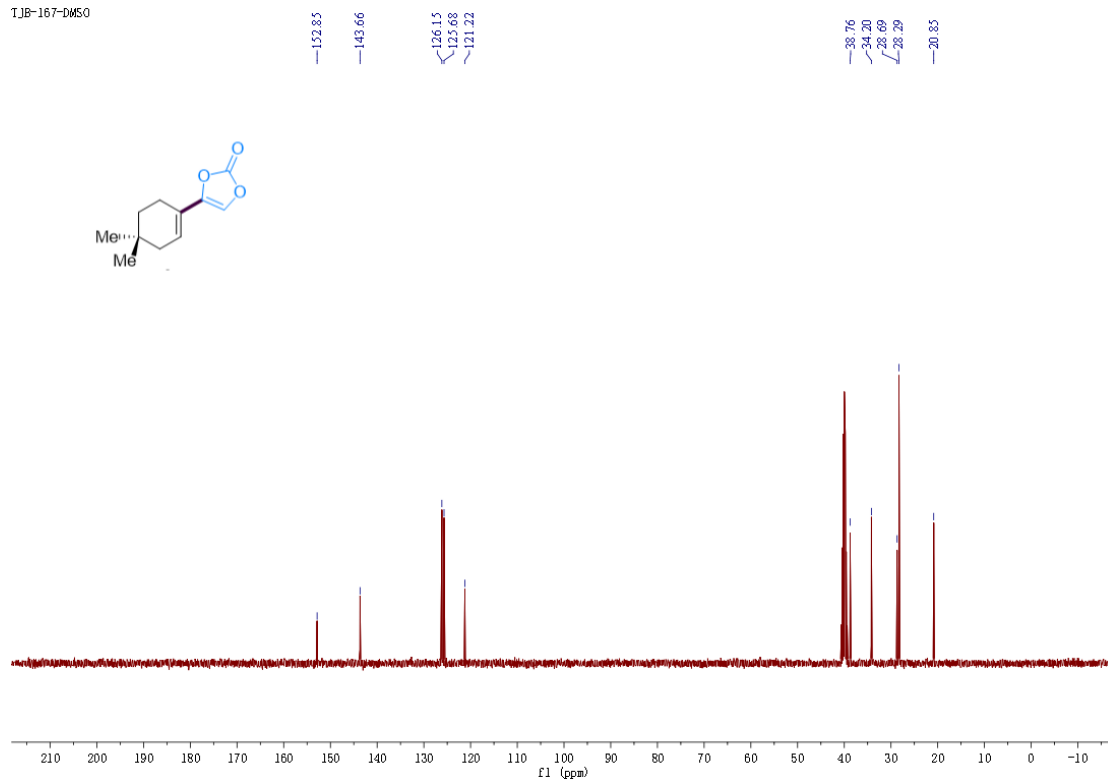

### $^1\text{H}$ NMR spectra of 3p (400 MHz, $\text{CDCl}_3$ )

TJB-C-3q- $\text{CDCl}_3$

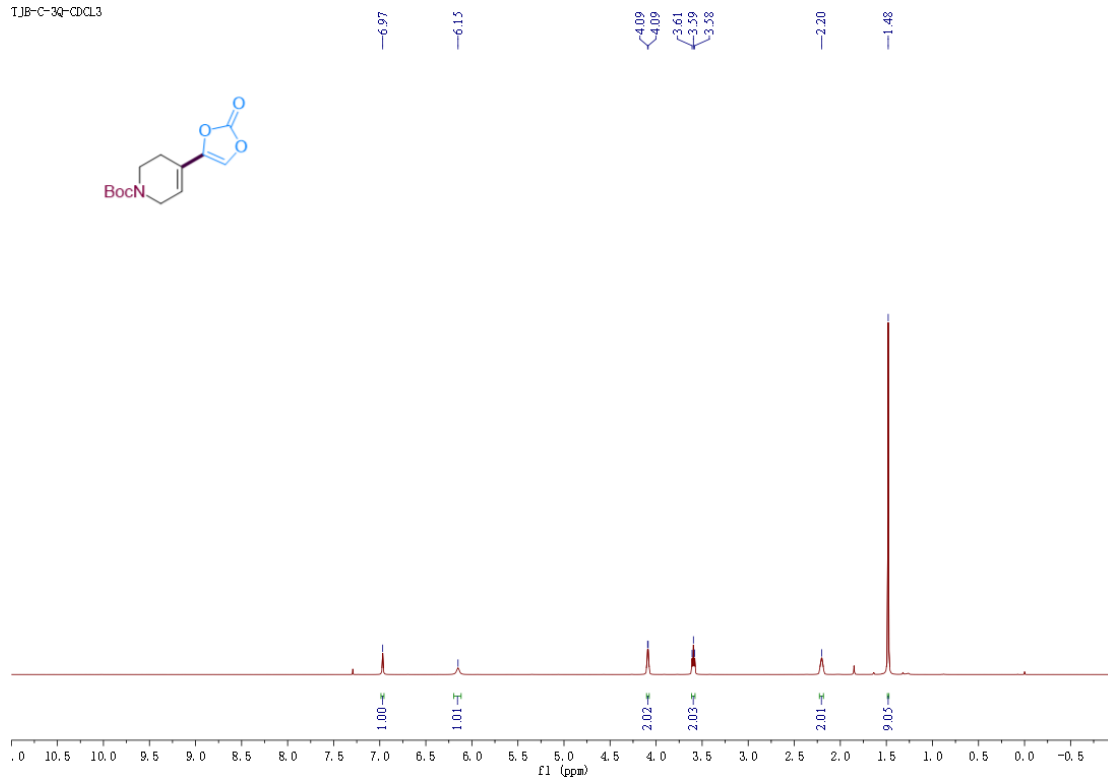



### <sup>13</sup>C NMR spectra of 3p (101 MHz, CDCl<sub>3</sub>)

TJB-C-3q-CDCl<sub>3</sub>

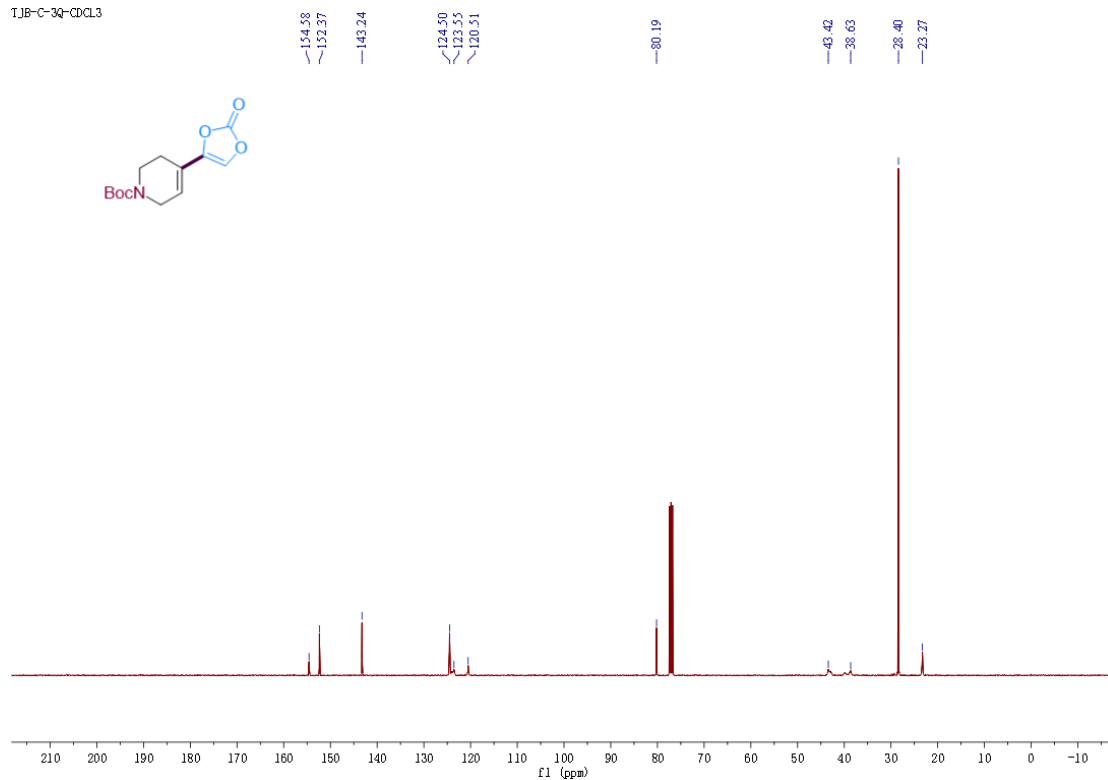

### <sup>1</sup>H NMR spectra of 3q (400 MHz, (CD<sub>3</sub>)<sub>2</sub>SO)

TJB-187-DMSO

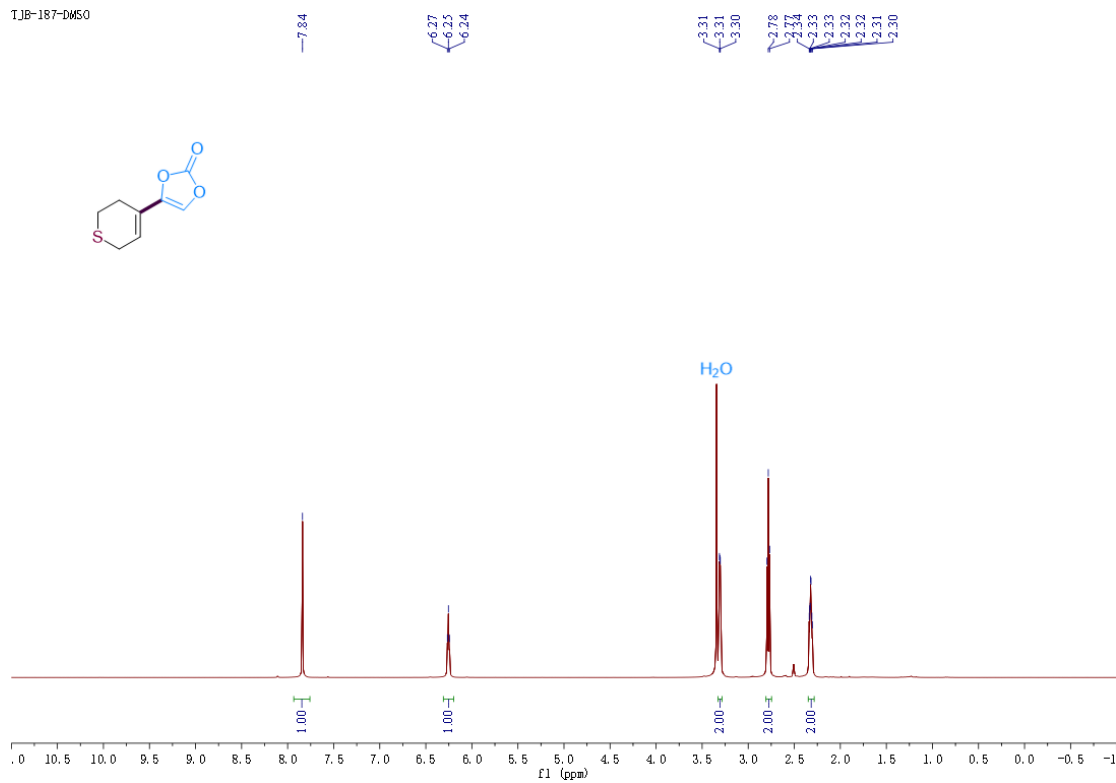

### <sup>13</sup>C NMR spectra of 3q (101 MHz, (CD<sub>3</sub>)<sub>2</sub>SO)

TJB-187-DMSO

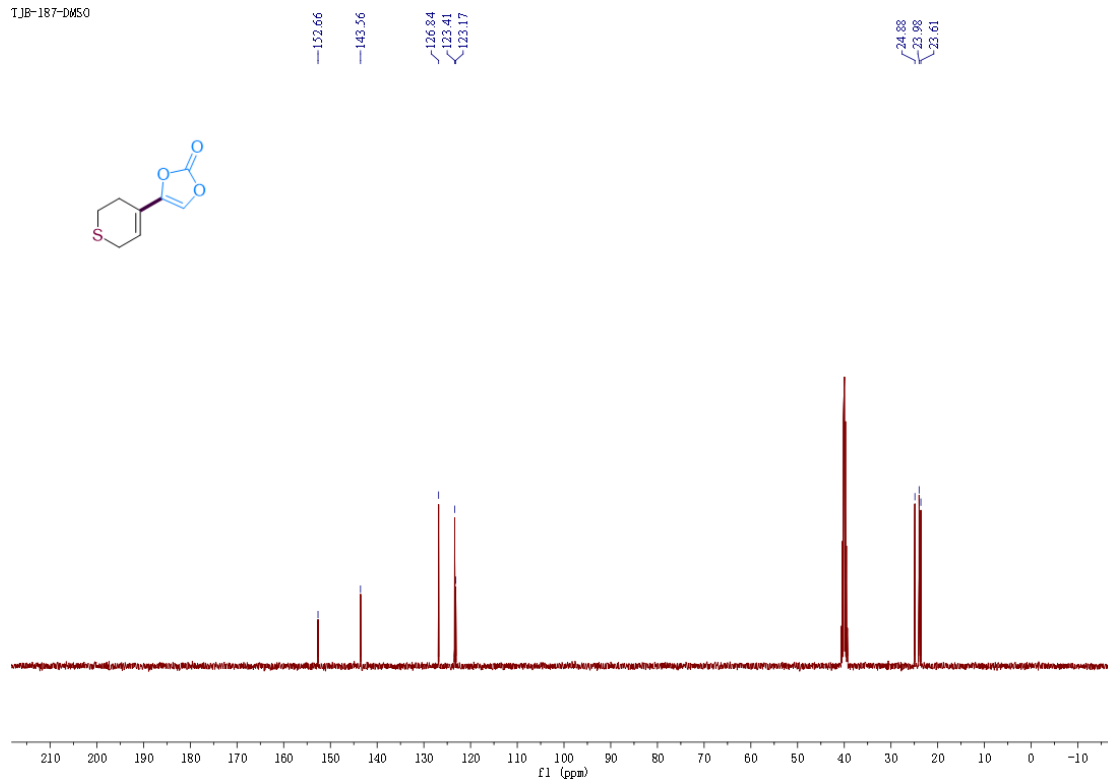

### <sup>1</sup>H NMR spectra of 3r (400 MHz, CDCl<sub>3</sub>)

TJB-136

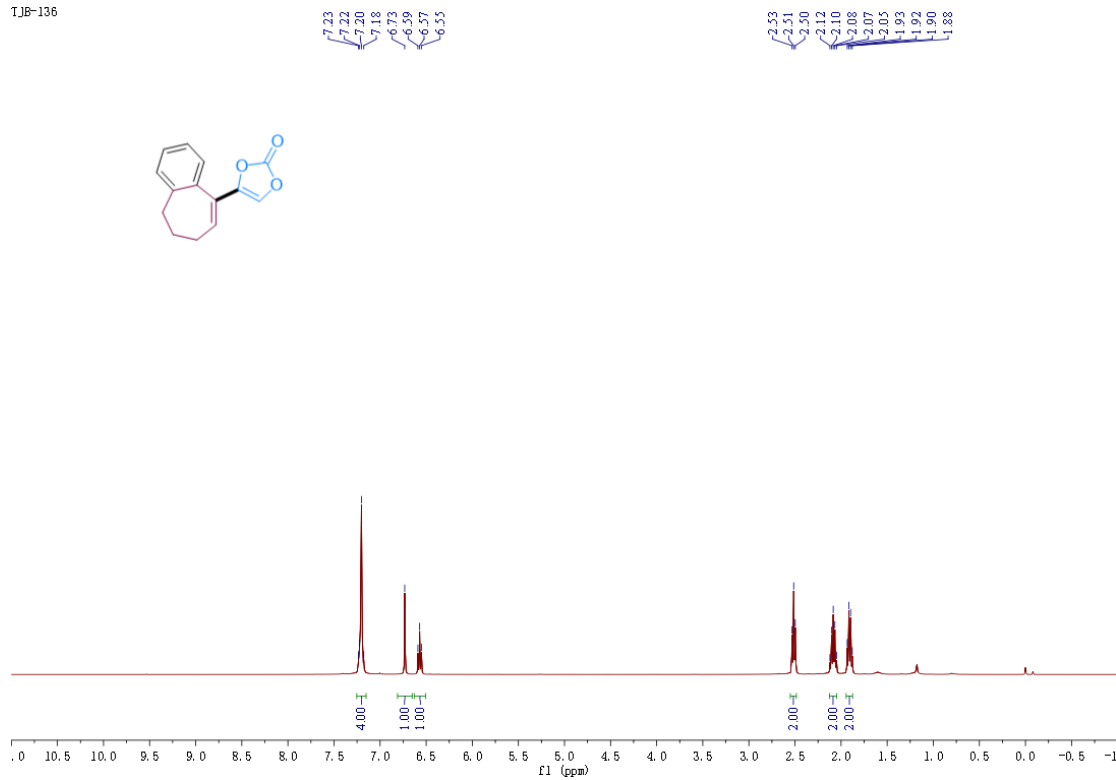

TJB-136

**<sup>13</sup>C NMR spectra of 3r (101 MHz, CDCl<sub>3</sub>)**

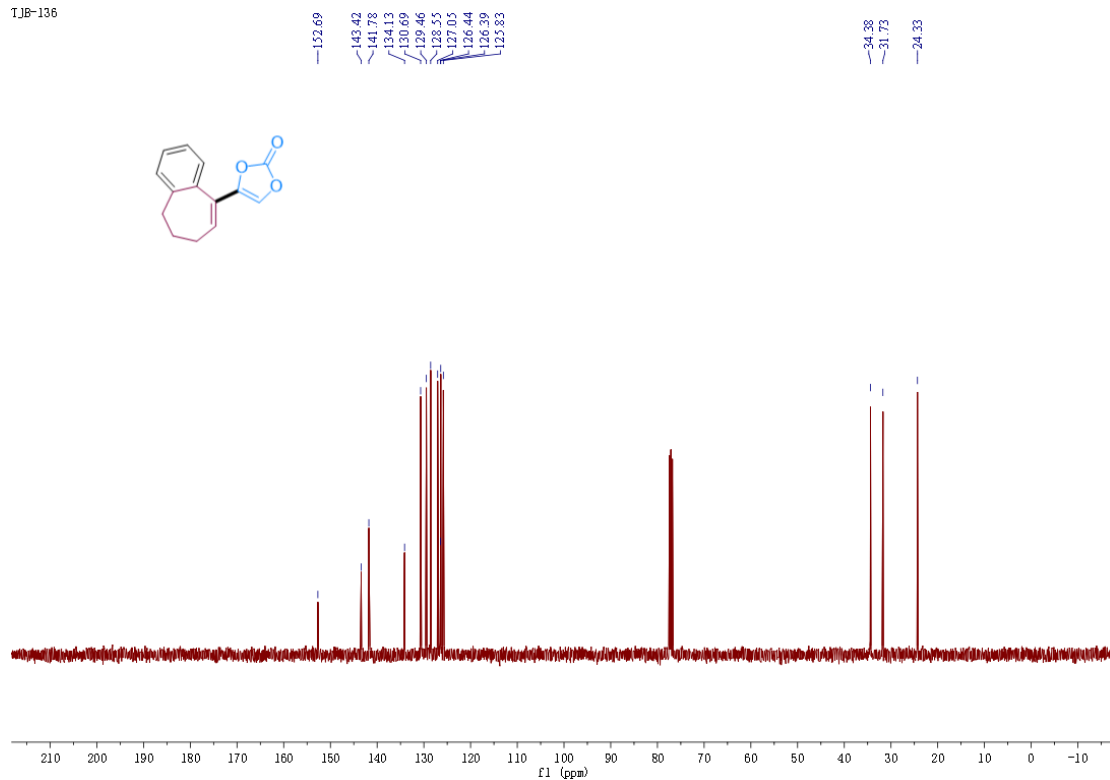

**<sup>1</sup>H NMR spectra of 3s (400 MHz, (CD<sub>3</sub>)<sub>2</sub>SO)**

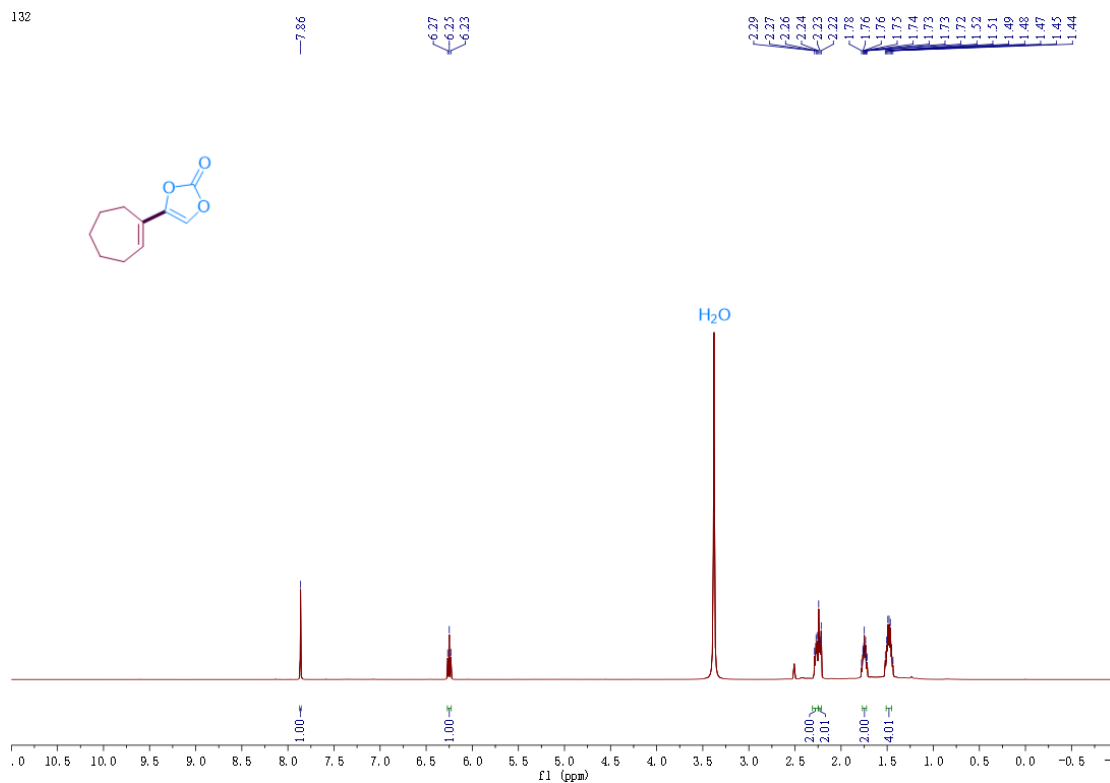

132

**<sup>13</sup>C NMR spectra of 3s (101 MHz, (CD<sub>3</sub>)<sub>2</sub>SO)**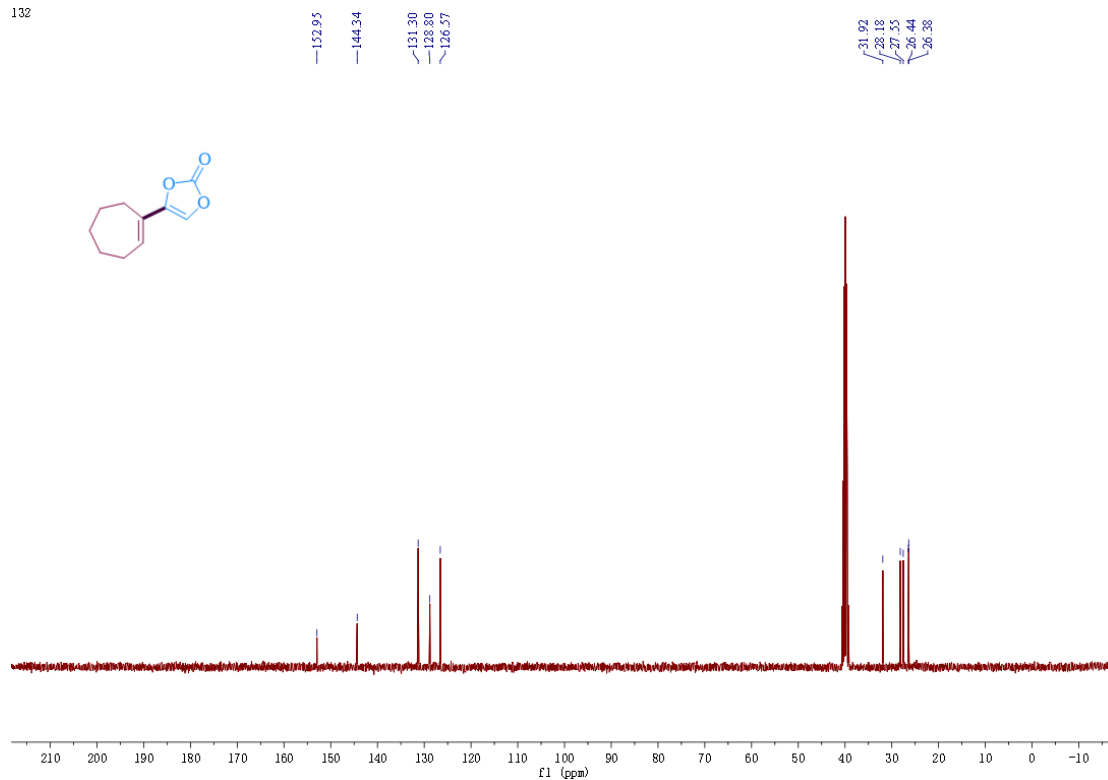**<sup>1</sup>H NMR spectra of 3t (400 MHz, (CD<sub>3</sub>)<sub>2</sub>SO)**

TJB-153-DMSO

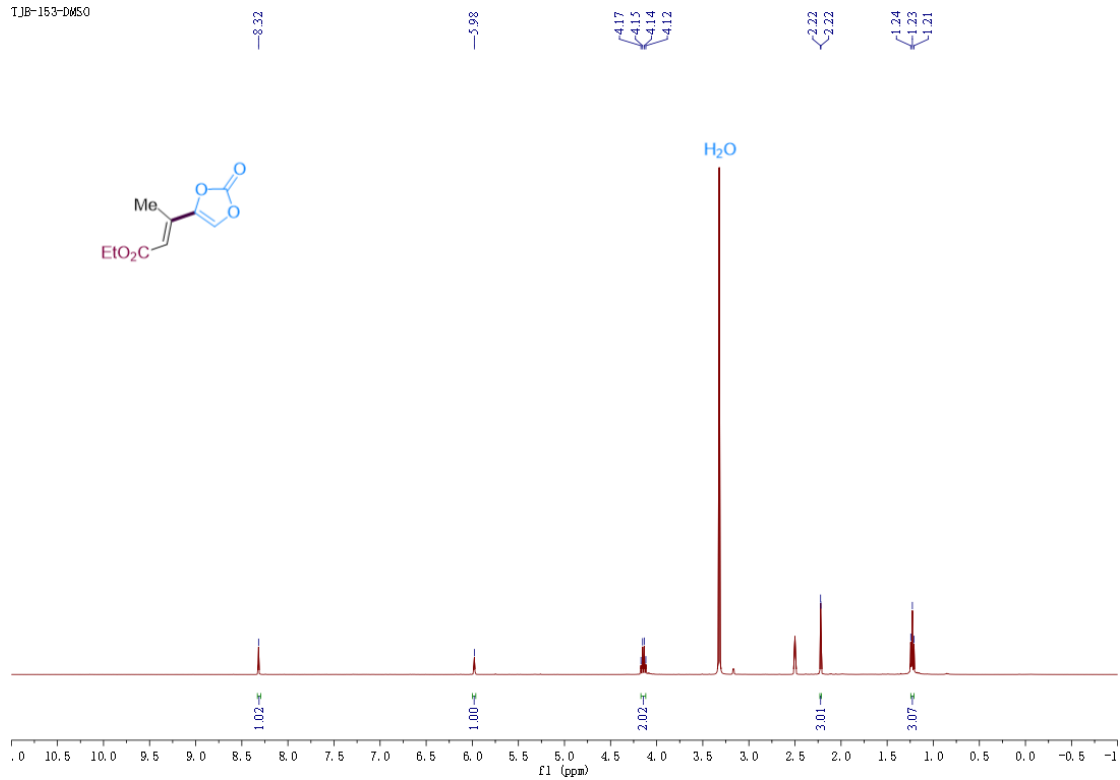

### <sup>13</sup>C NMR spectra of 3t (101 MHz, (CD<sub>3</sub>)<sub>2</sub>SO)

TJB-153-DMSO. 2. 1. 1r

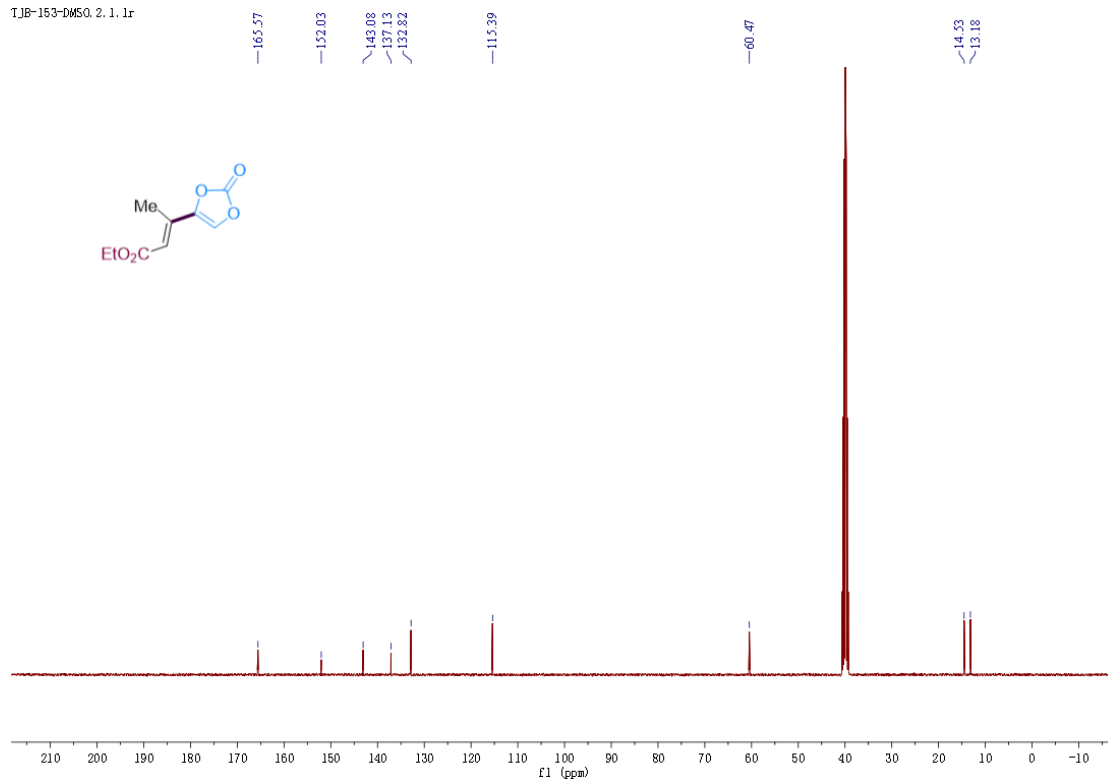

### <sup>1</sup>H NMR spectra of 3u (400 MHz, CDCl<sub>3</sub>)

TJB-138

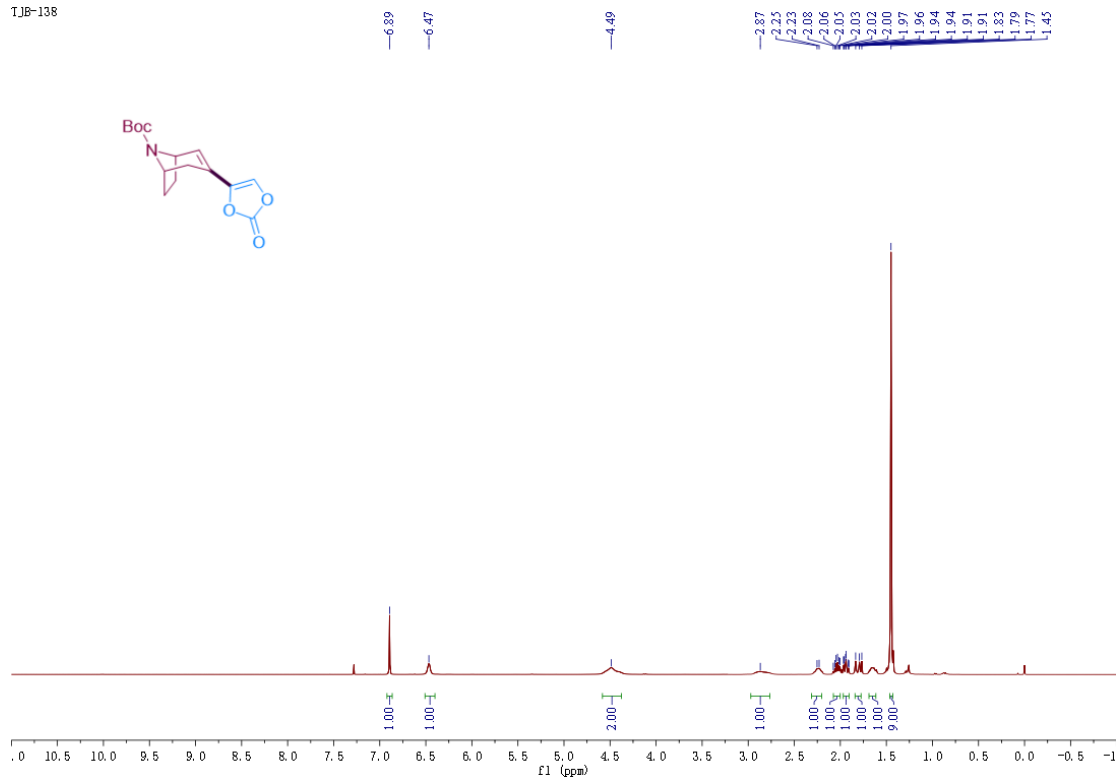

### <sup>13</sup>C NMR spectra of 3u (101 MHz, CDCl<sub>3</sub>)

TJB-138-C-1024

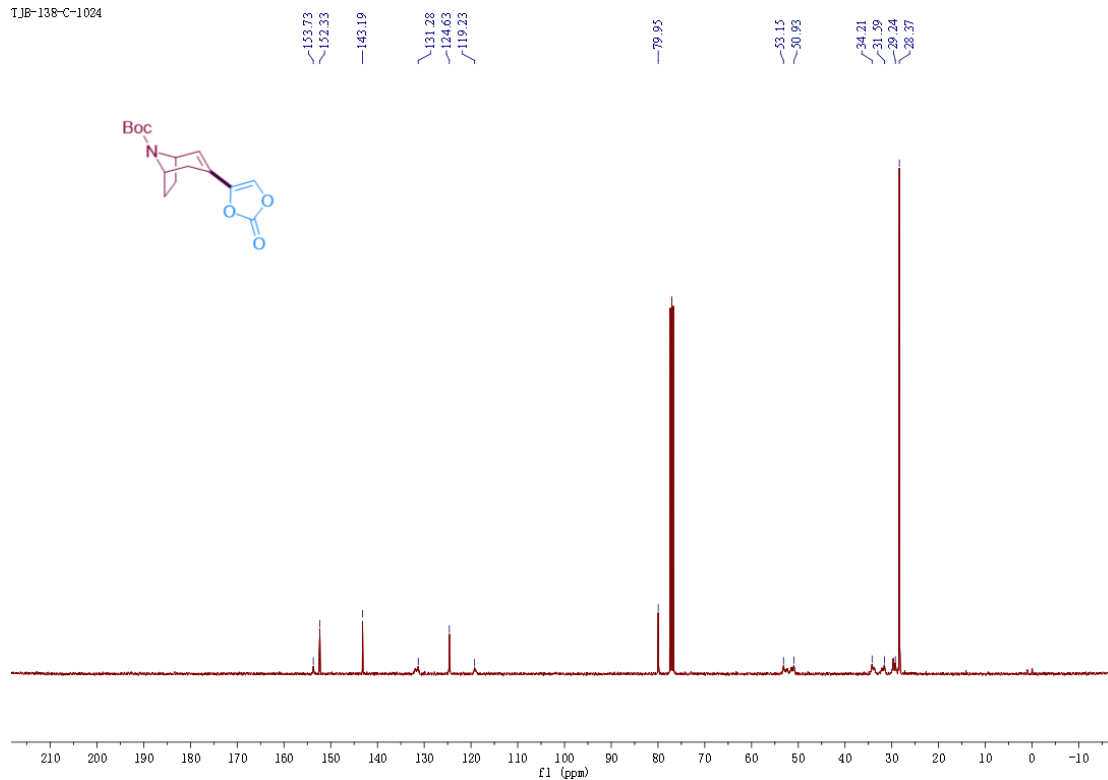

### <sup>1</sup>H NMR spectra of 3v (400 MHz, (CD<sub>3</sub>)<sub>2</sub>SO)

154

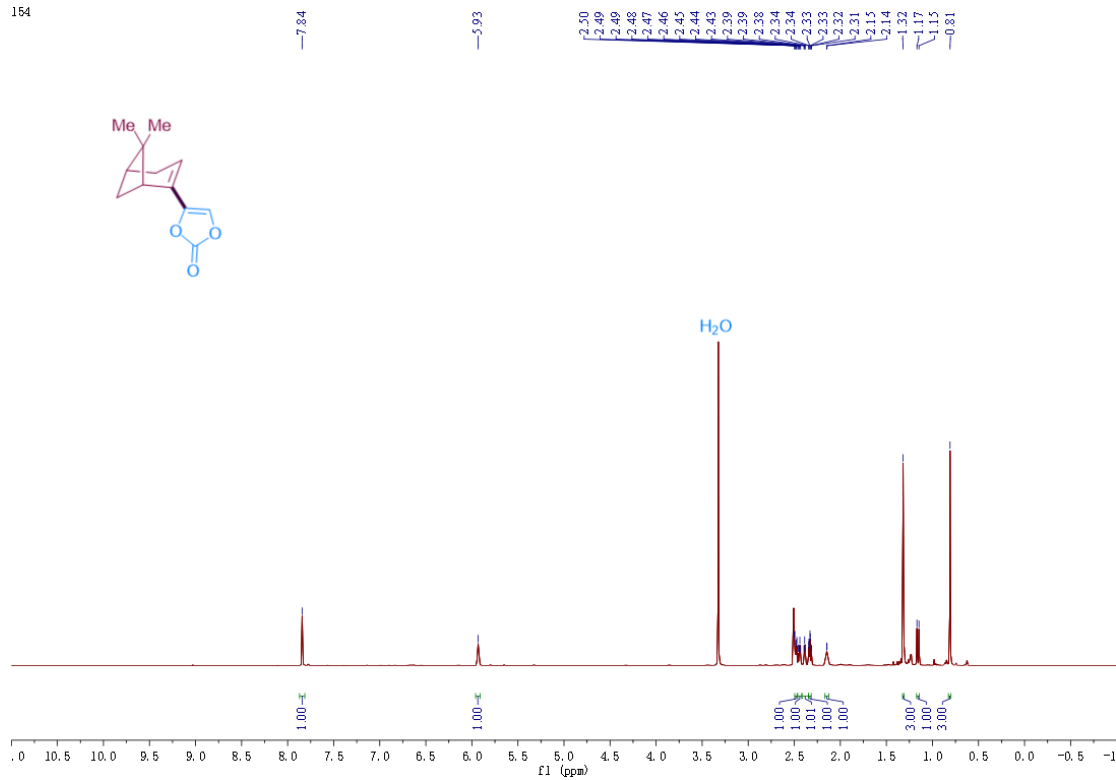

### <sup>13</sup>C NMR spectra of 3v (101 MHz, (CD<sub>3</sub>)<sub>2</sub>SO)

TJB-154.2.1.1r

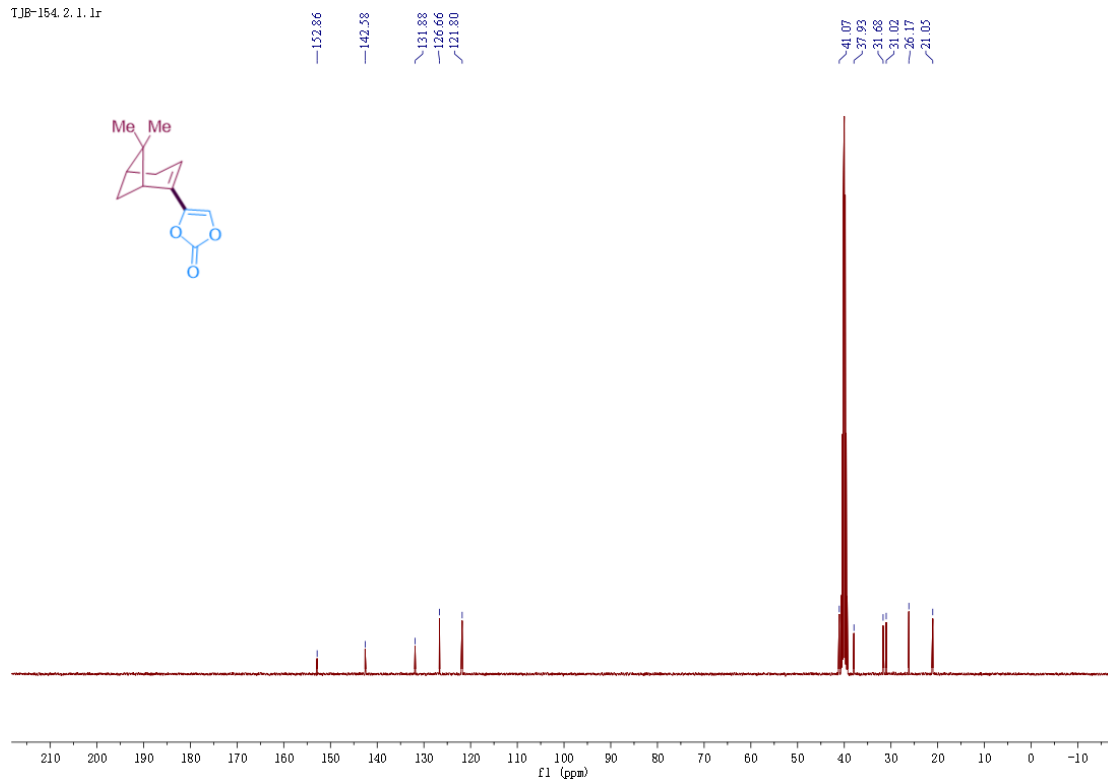

### <sup>1</sup>H NMR spectra of 3w (400 MHz, CDCl<sub>3</sub>)

TJB-134

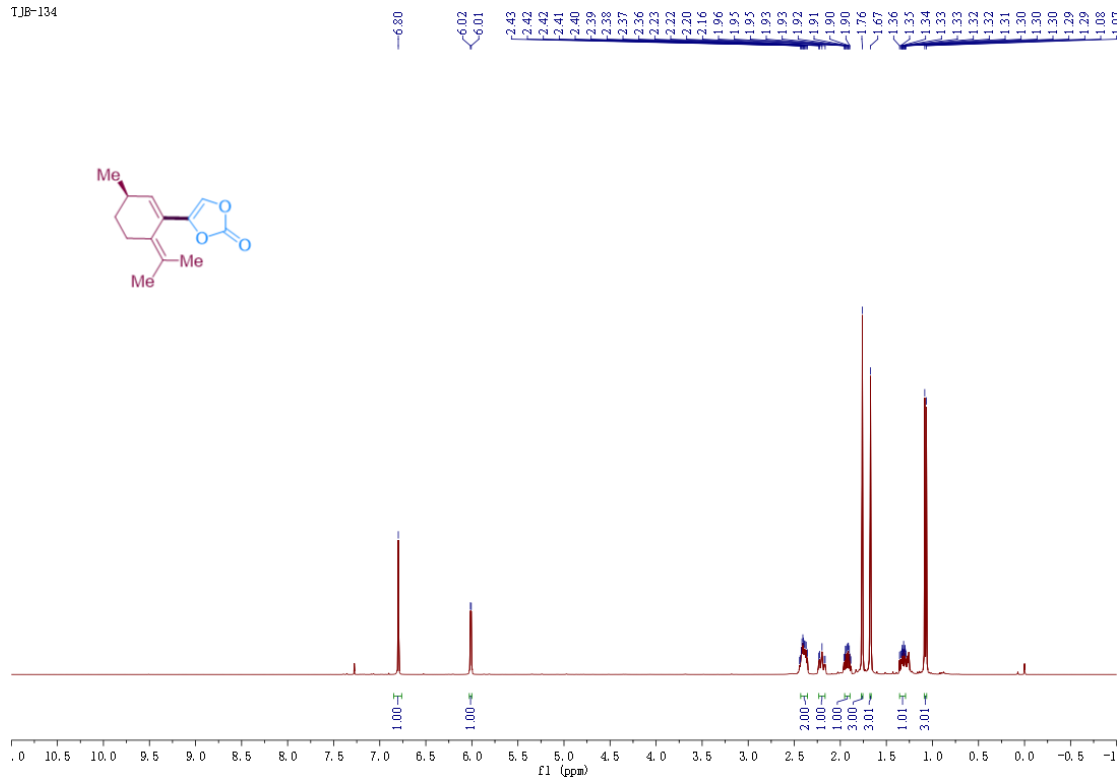

### <sup>13</sup>C NMR spectra of 3w (101 MHz, CDCl<sub>3</sub>)

TJB-125-8

153.00  
144.72  
138.85  
129.13  
122.83  
124.96  
124.47

31.02  
31.28  
27.19  
23.87  
21.51  
20.96

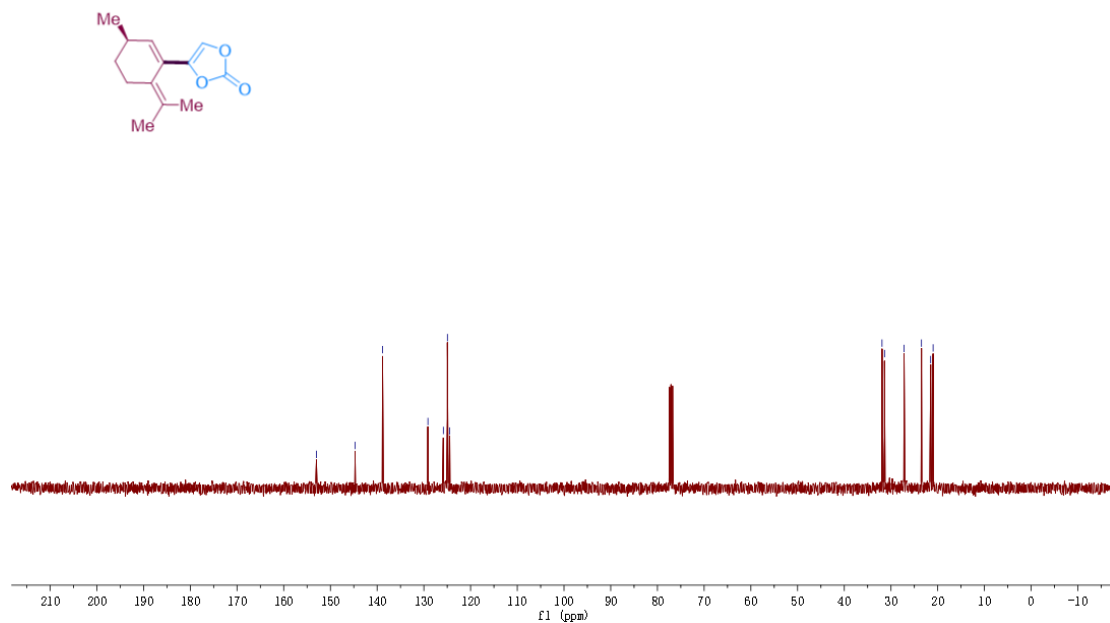

### <sup>1</sup>H NMR spectra of 3x (400 MHz, CDCl<sub>3</sub>)

TJB-175-CDCl<sub>3</sub>

6.92  
6.21  
6.20  
6.19  
6.18

4.50  
4.47

2.27  
2.25  
2.24  
2.22  
2.14  
2.13  
2.12  
1.99  
1.99  
1.90  
1.89  
1.89  
1.87  
1.86  
1.79  
1.79  
1.78  
1.77  
1.76  
1.75  
1.47  
1.46  
1.44  
1.43  
1.41  
1.38  
1.37  
1.21  
1.19

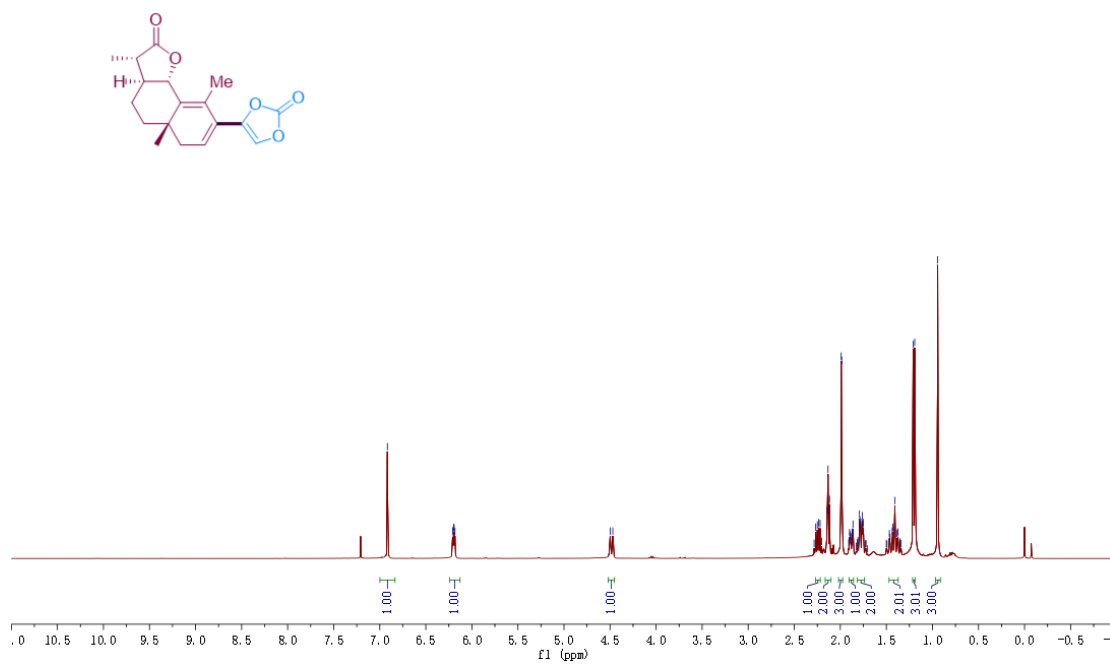



**<sup>13</sup>C NMR spectra of 3x (101 MHz, CDCl<sub>3</sub>)**

TJB-175-CDCl<sub>3</sub>

178.42  
152.61  
143.18  
134.76  
129.21  
126.33  
122.84  
122.31  
82.22  
51.33  
42.06  
40.92  
40.31  
36.60  
24.26  
22.88  
16.13  
12.41

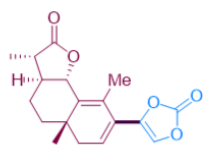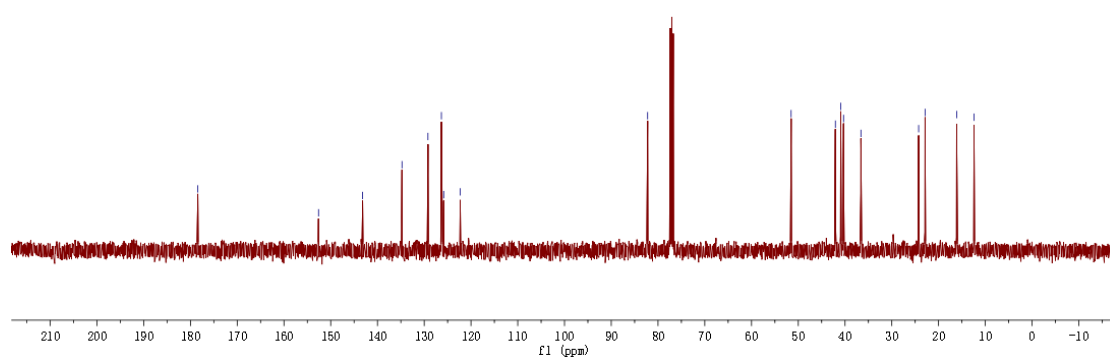

**<sup>1</sup>H NMR spectra of 3y (400 MHz, CDCl<sub>3</sub>)**

7.19  
7.16  
7.06  
6.79  
6.73  
6.71  
6.70  
6.65  
6.64  
6.18  
6.18  
6.17  
5.77  
5.78  
5.93  
5.91  
5.90  
5.89  
5.86  
5.44  
5.45  
5.42  
5.41  
5.40  
5.39  
5.38  
5.37  
5.34  
5.33  
5.32  
5.31  
5.31  
5.28  
5.28  
5.16  
5.13  
5.12  
5.09  
5.09  
1.97  
1.96  
1.94  
1.93  
1.93  
1.92  
1.91  
1.90  
1.78  
1.77  
1.75  
1.75  
1.74  
1.73  
1.72  
1.70  
1.68  
1.67  
1.65  
1.64  
1.62  
1.61  
1.59  
1.59  
1.52  
1.52  
1.49  
1.47  
1.46  
1.44  
1.43  
1.41  
0.95

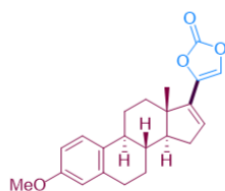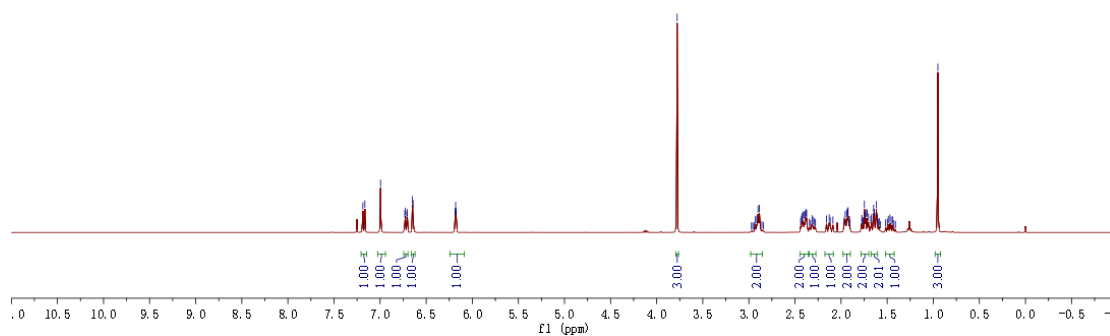

**<sup>13</sup>C NMR spectra of 3y (101 MHz, CDCl<sub>3</sub>)**

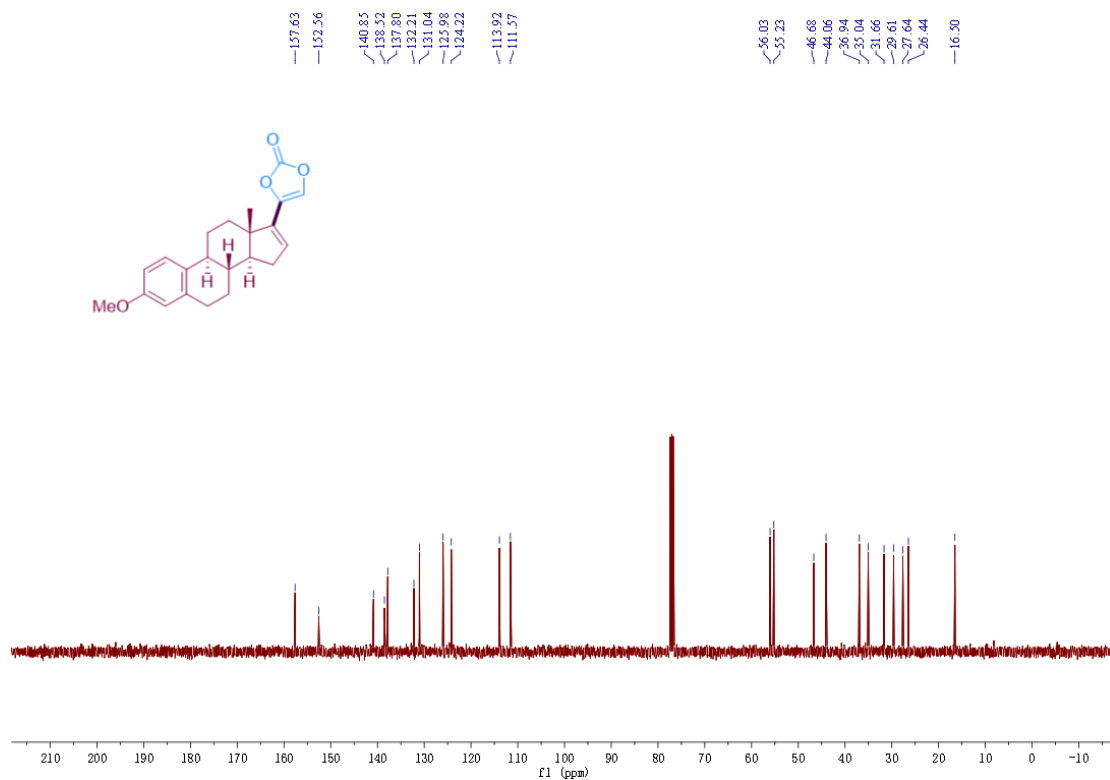

**<sup>1</sup>H NMR spectra of 3z (400 MHz, CDCl<sub>3</sub>)**

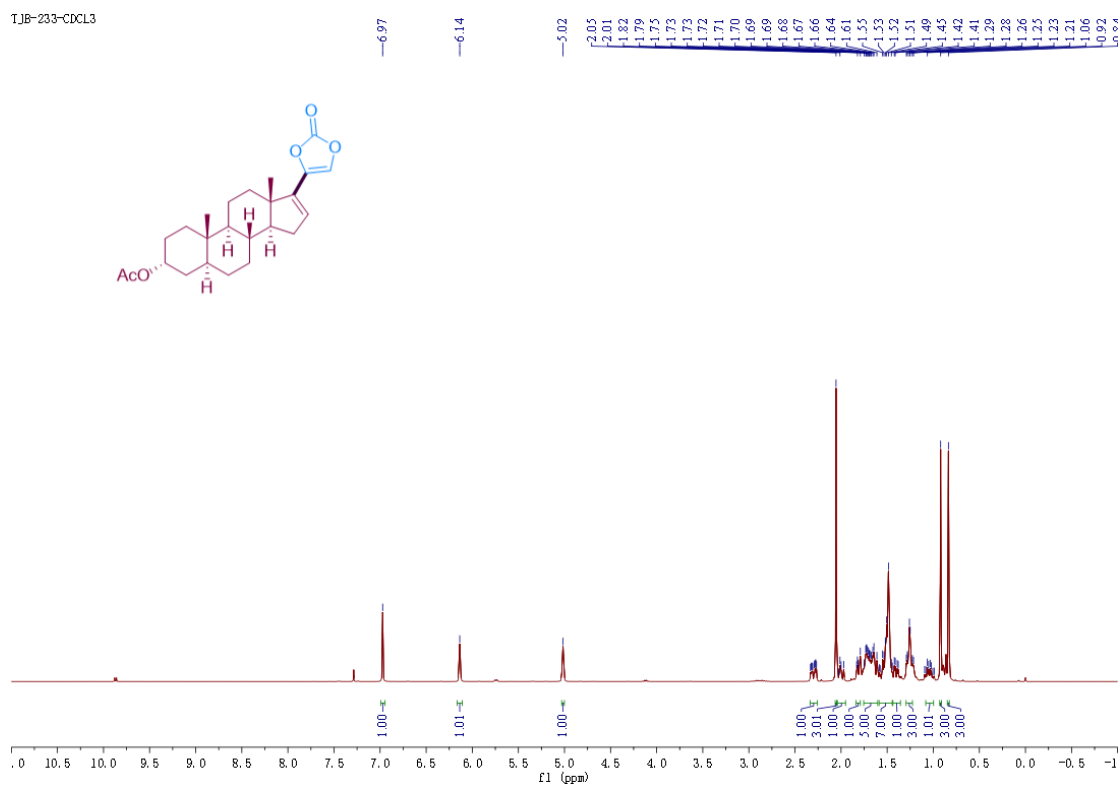

### <sup>13</sup>C NMR spectra of 3z (101 MHz, CDCl<sub>3</sub>)

TJB-233-CDCl<sub>3</sub>-C10

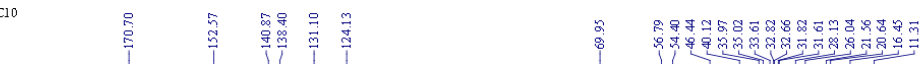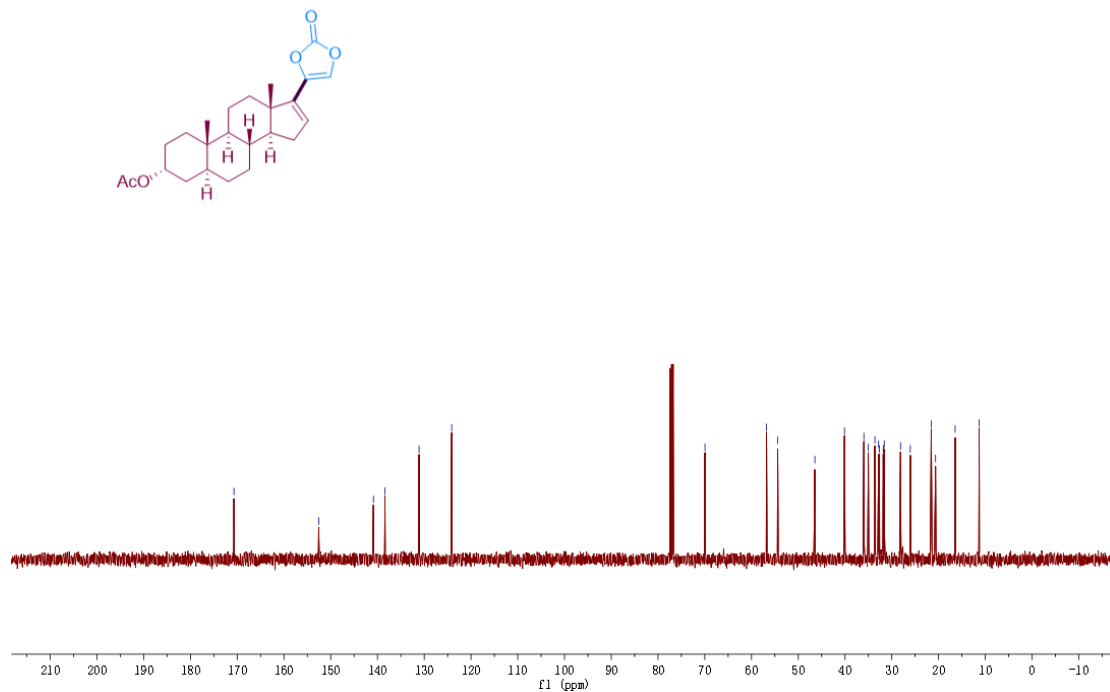

### <sup>1</sup>H NMR spectra of 3aa (400 MHz, CDCl<sub>3</sub>)

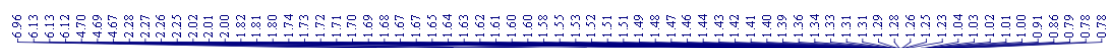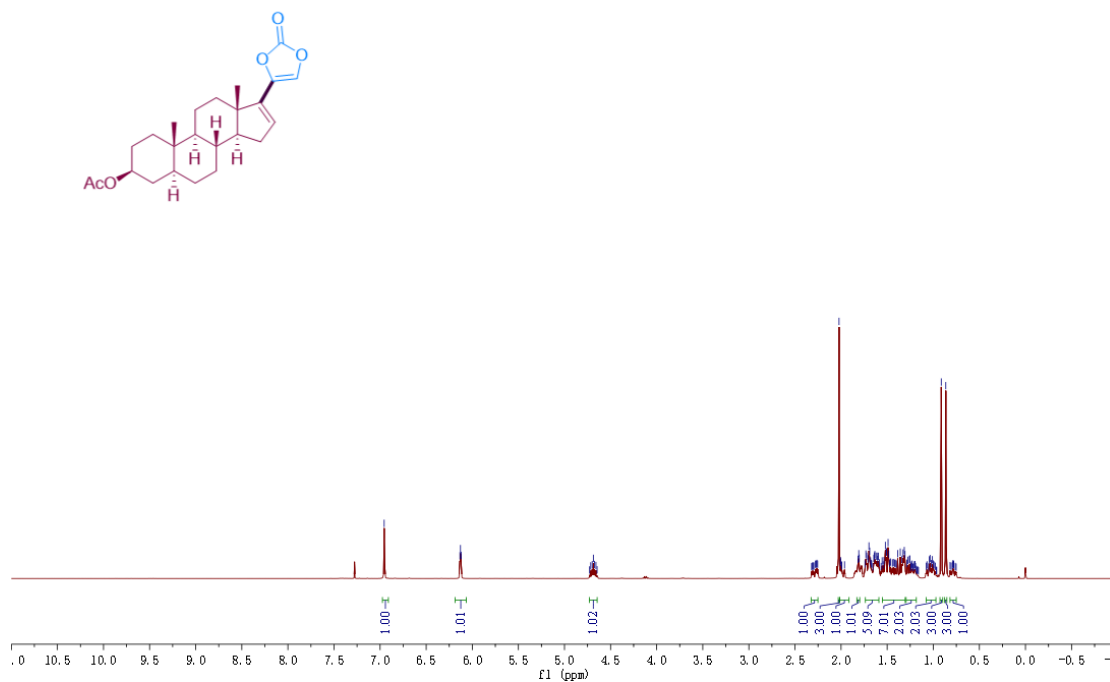

### <sup>13</sup>C NMR spectra of 3aa (101 MHz, CDCl<sub>3</sub>)

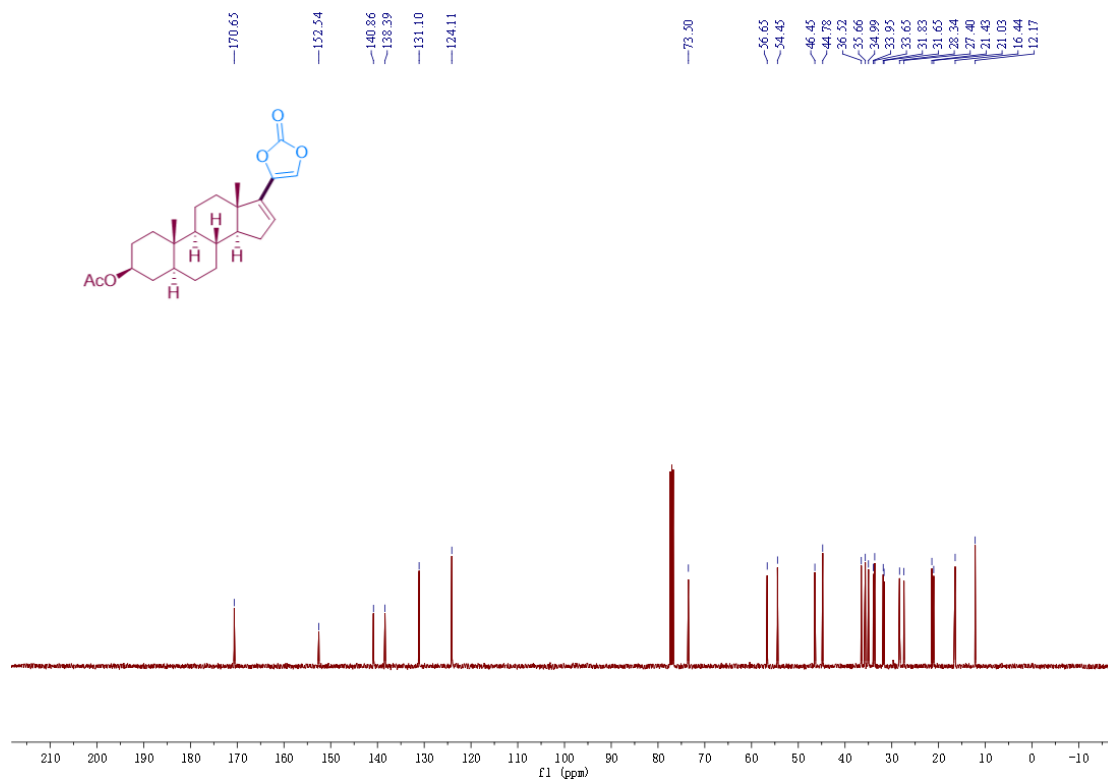

### <sup>1</sup>H NMR spectra of 3ab (400 MHz, CDCl<sub>3</sub>)

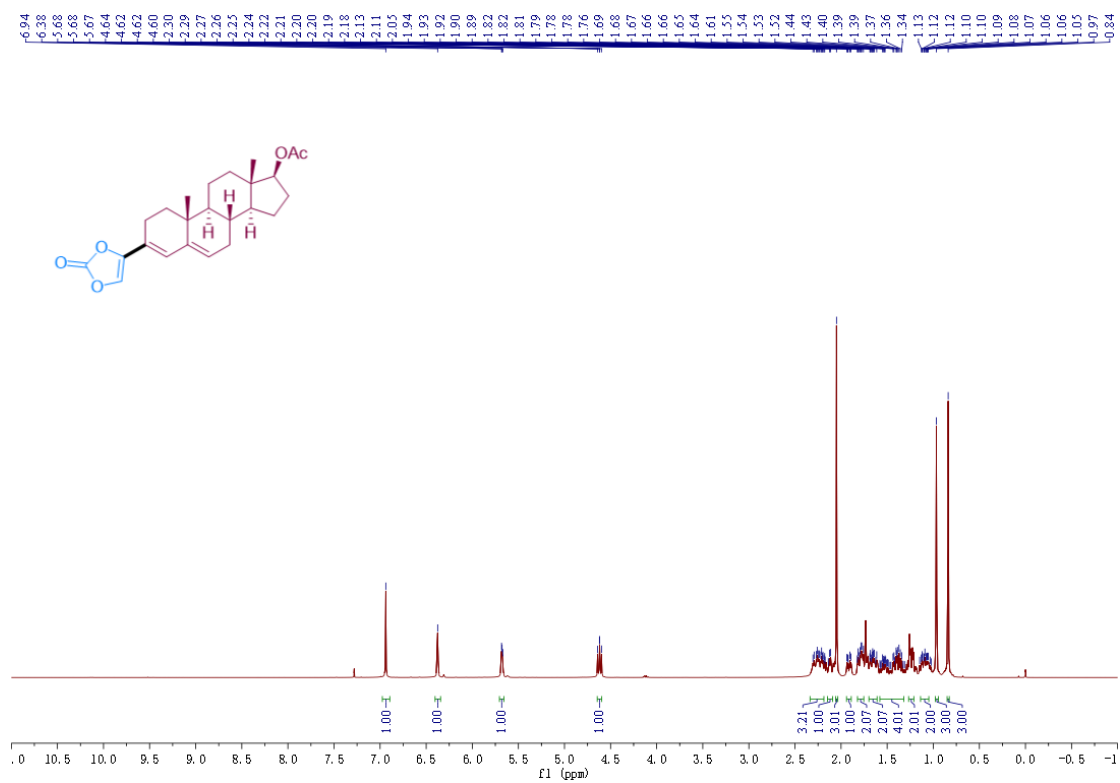

**<sup>13</sup>C NMR spectra of 3ab (101 MHz, CDCl<sub>3</sub>)**

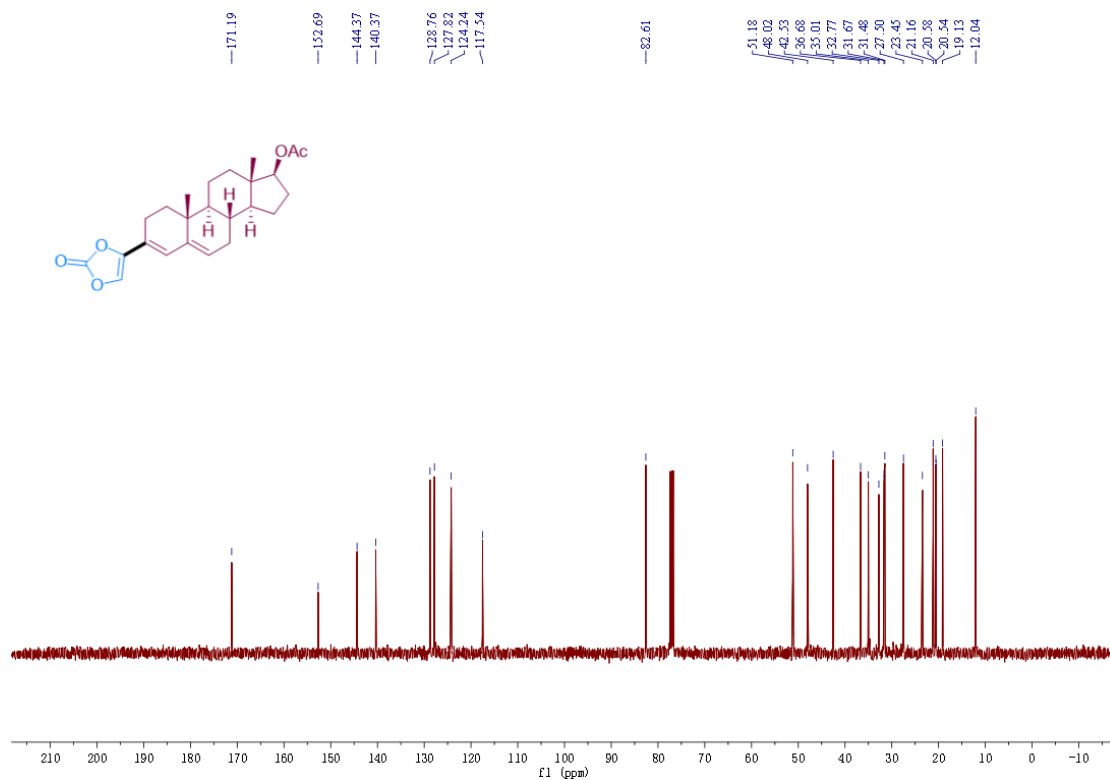

**<sup>1</sup>H NMR spectra of 3ac (400 MHz, CDCl<sub>3</sub>)**

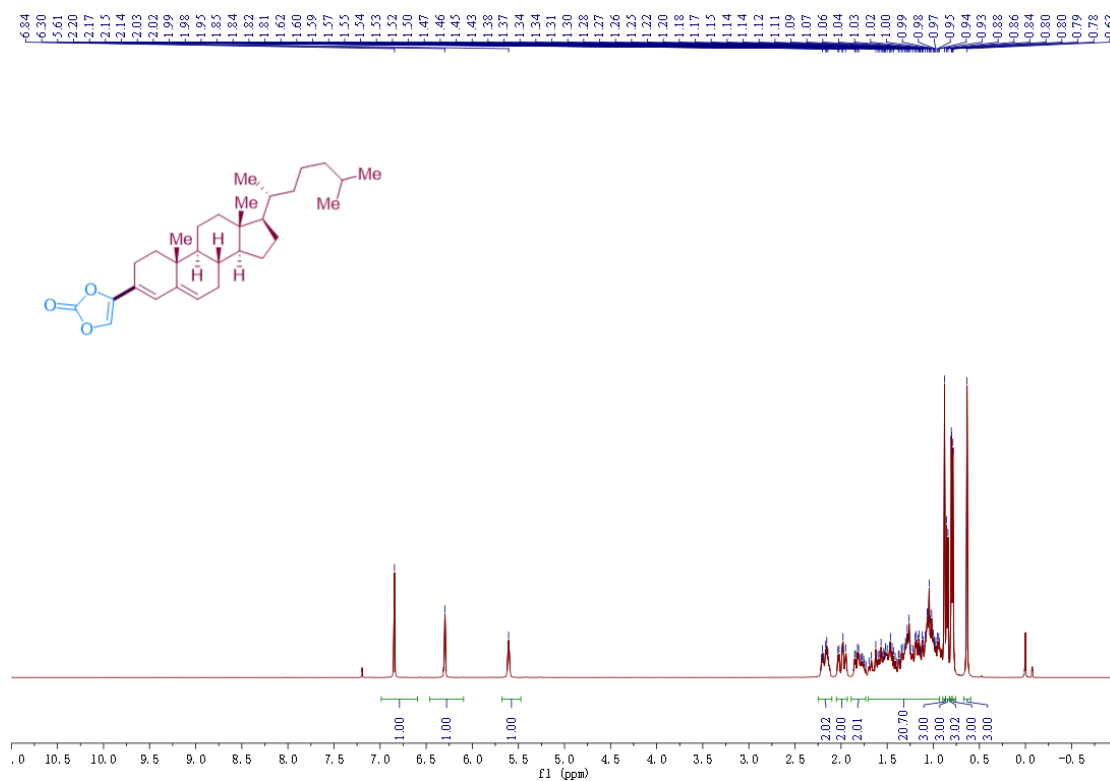

### <sup>13</sup>C NMR spectra of 3ac (101 MHz, CDCl<sub>3</sub>)

TJB-128-C

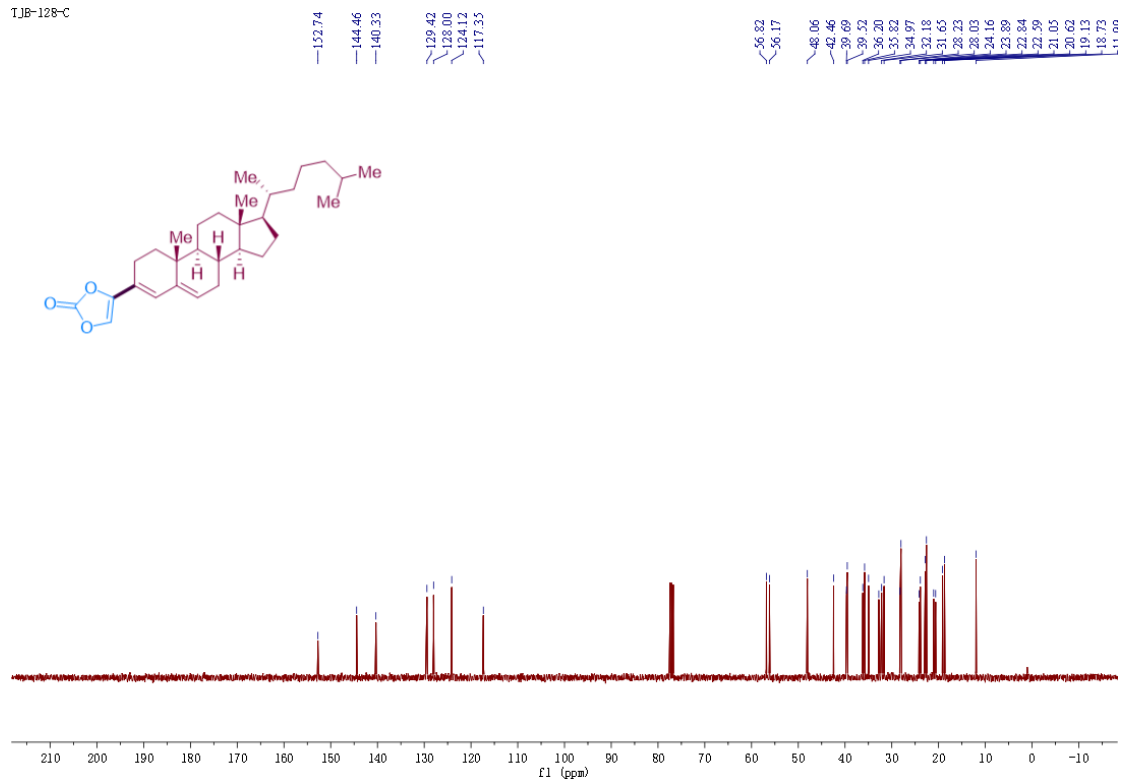

### <sup>1</sup>H NMR spectra of 3ad (400 MHz, CDCl<sub>3</sub>)

t\_jbr-3ad

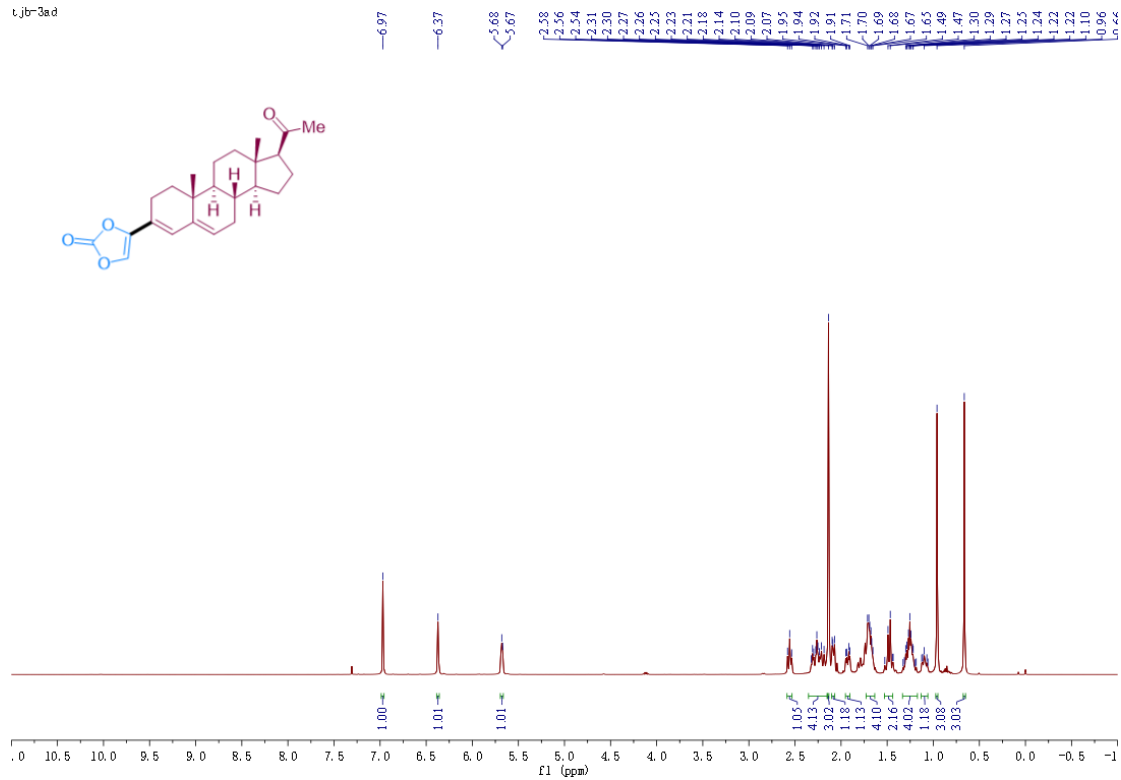

**<sup>13</sup>C NMR spectra of 3ad (101 MHz, CDCl<sub>3</sub>)**

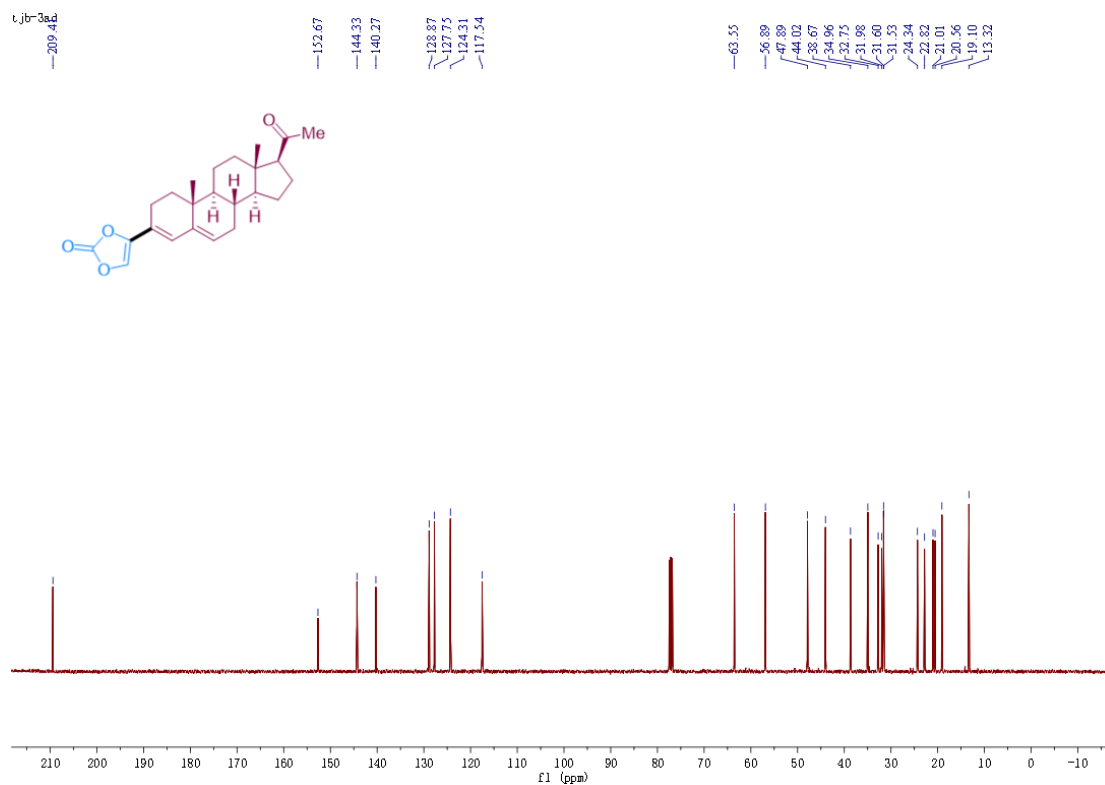

**<sup>1</sup>H NMR spectra of 3ae (400 MHz, CDCl<sub>3</sub>)**

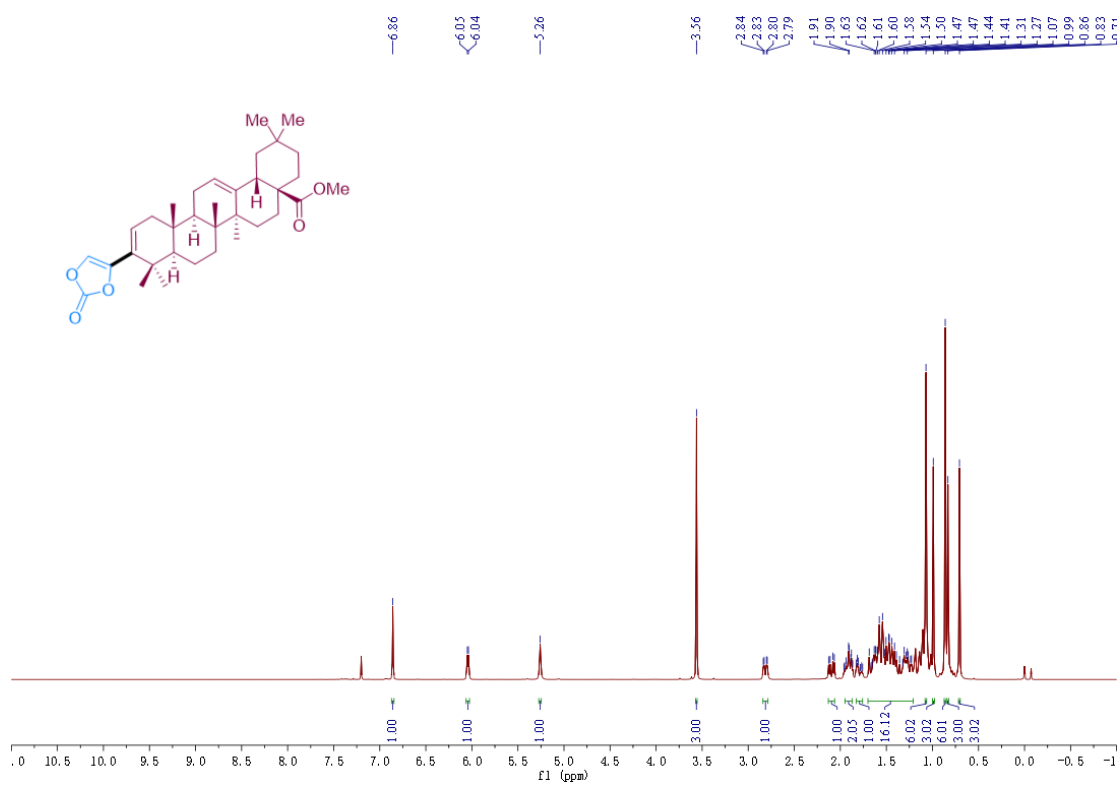

### <sup>13</sup>C NMR spectra of 3ae (101 MHz, CDCl<sub>3</sub>)

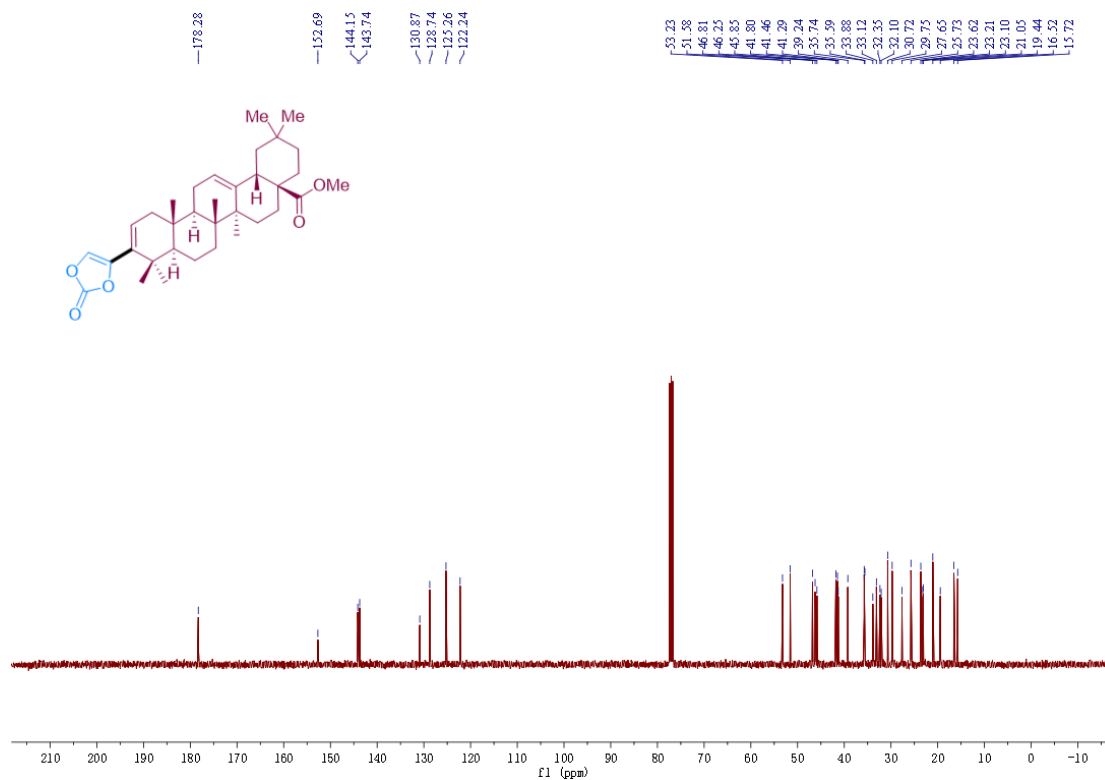

### <sup>1</sup>H NMR spectra of 5a (400 MHz, (CD<sub>3</sub>)<sub>2</sub>SO)

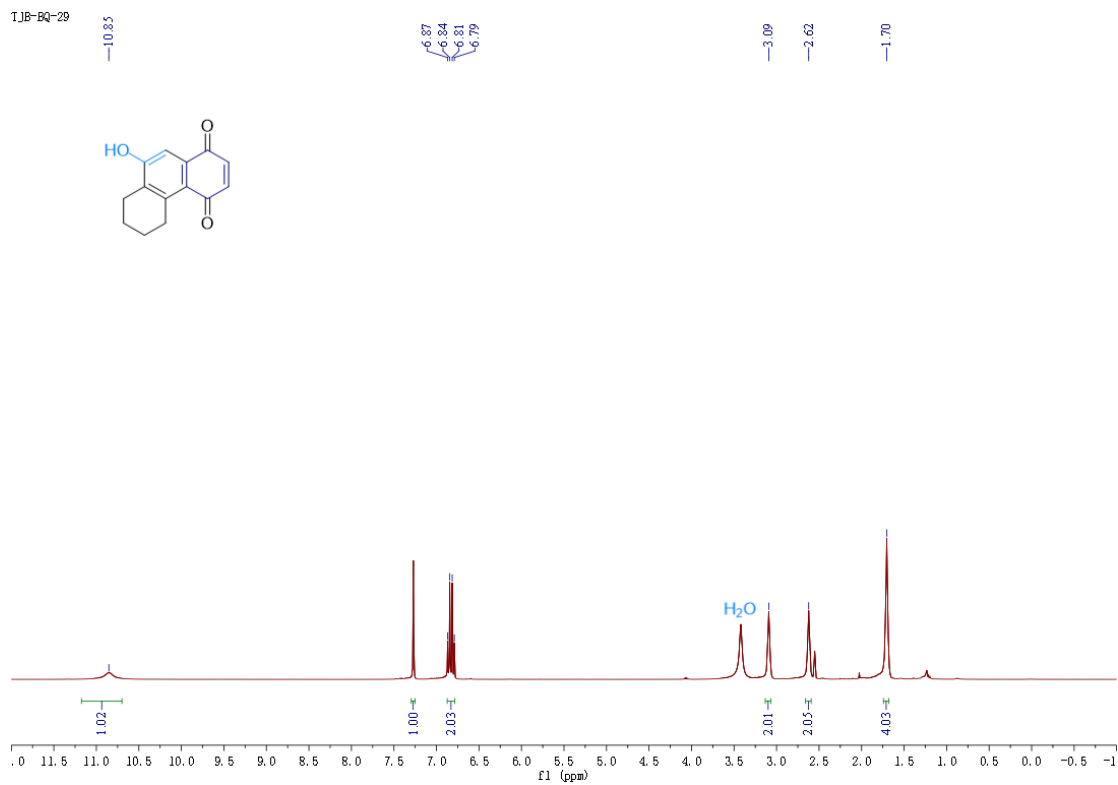



### <sup>13</sup>C NMR spectra of 5a (101 MHz, (CD<sub>3</sub>)<sub>2</sub>SO)

TJB-BQ-29

186.12  
183.75

159.94

143.07

141.54

133.99

132.87

131.41

121.64

109.69

29.11

24.39

22.63

21.37

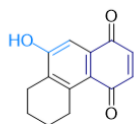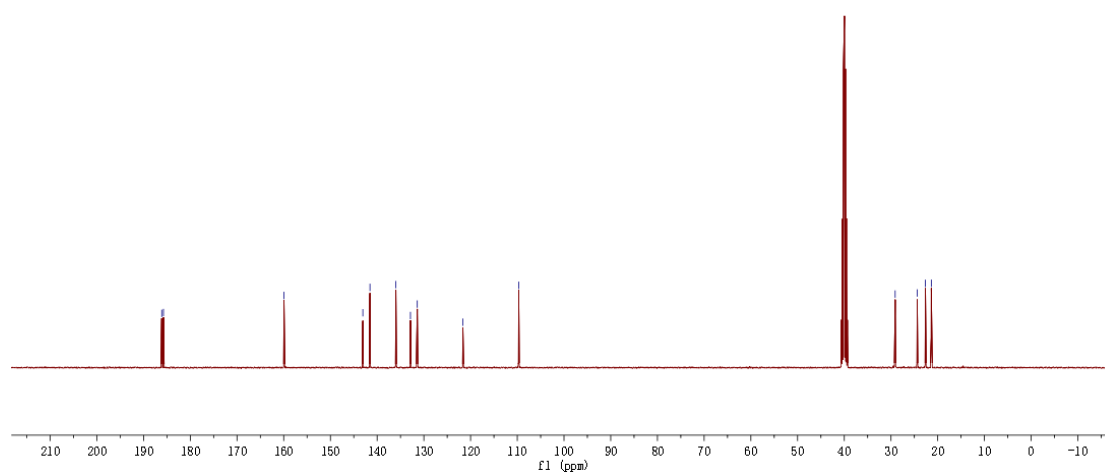

### <sup>1</sup>H NMR spectra of 5b (400 MHz, (CD<sub>3</sub>)<sub>2</sub>SO)

DA-BQ-4-1-DMSO

10.79

7.23

6.82

6.79

6.74

6.72

3.34

3.30

3.29

2.89

2.86

2.83

2.57

2.56

2.55

2.34

2.34

1.23

1.21

1.20

1.18

1.14

1.13

1.13

1.11

1.10

1.08

1.07

1.05

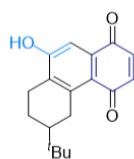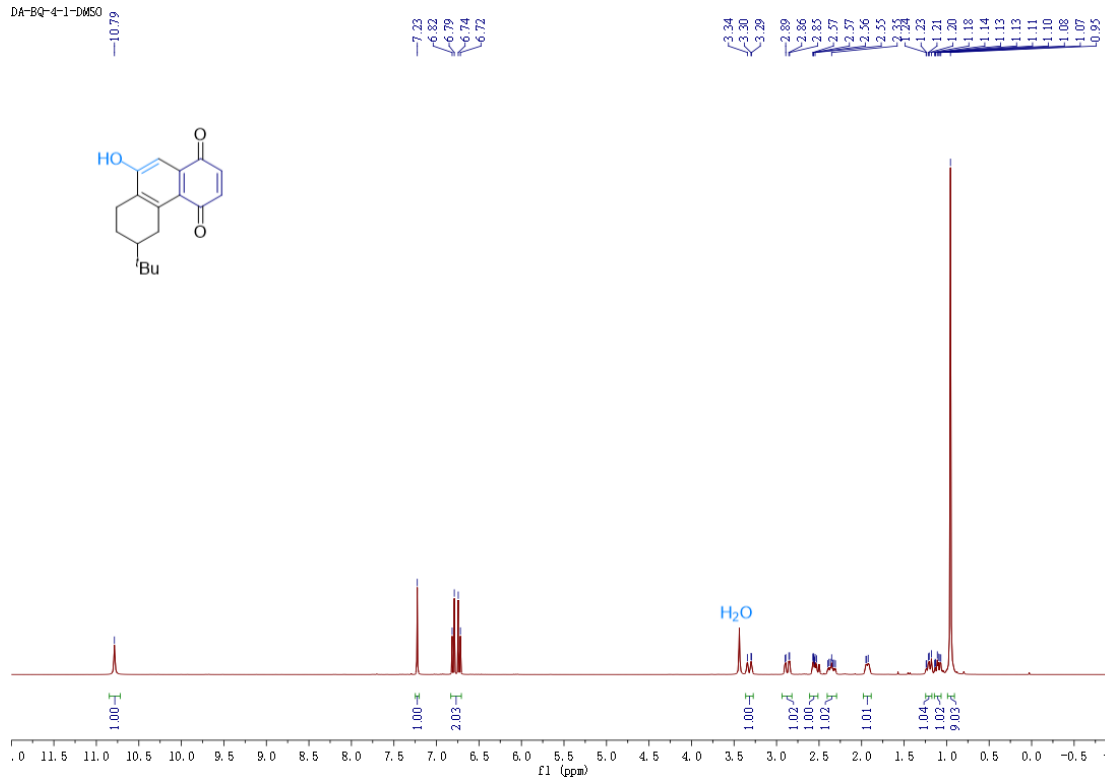

### <sup>13</sup>C NMR spectra of 5b (101 MHz, (CD<sub>3</sub>)<sub>2</sub>SO)

DA-BQ-4-1-DMSO

186.02  
185.64

159.68

145.62

141.44

135.79

133.03

131.22

121.65

109.66

43.89

32.99

30.72

27.48

25.47

22.72

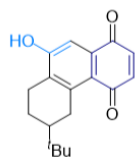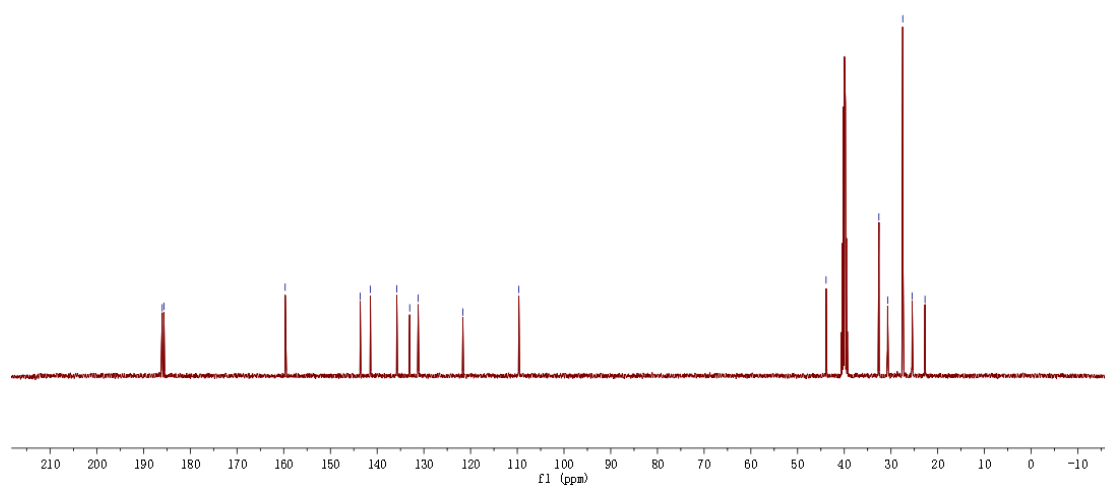

### <sup>1</sup>H NMR spectra of 5c (400 MHz, (CD<sub>3</sub>)<sub>2</sub>SO)

DA-268-DMSO

10.89

7.29

6.86

6.83

6.81

6.78

2.90

2.63

2.61

1.51

1.49

1.47

0.93

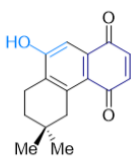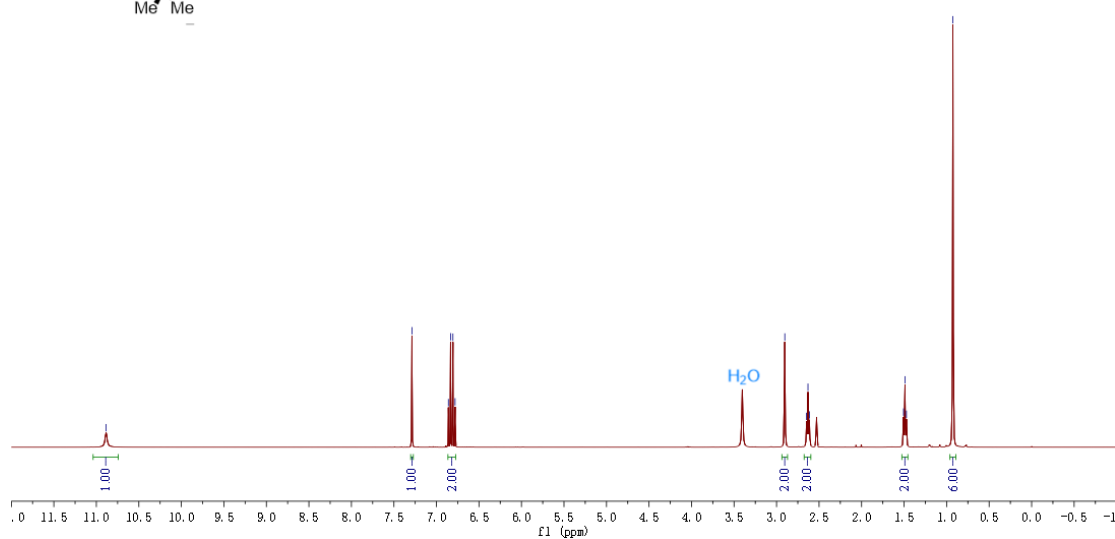

### <sup>13</sup>C NMR spectra of 5c (101 MHz, (CD<sub>3</sub>)<sub>2</sub>SO)

DA-268-DMSO

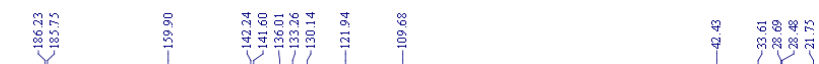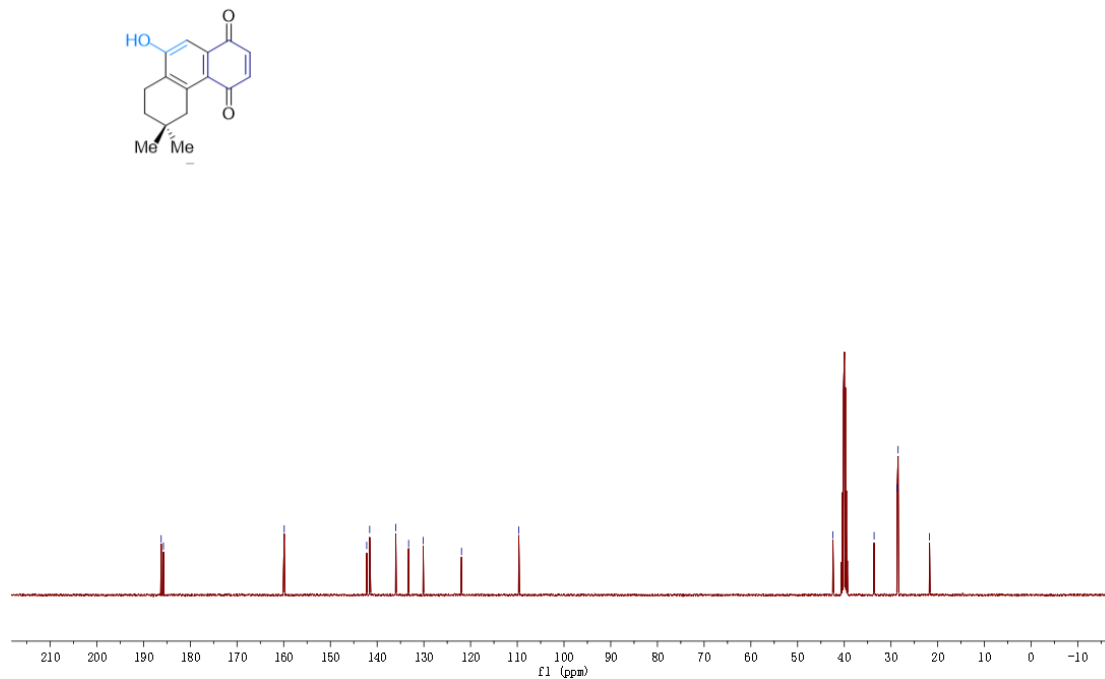

### <sup>1</sup>H NMR spectra of 5d (400 MHz, (CD<sub>3</sub>)<sub>2</sub>SO)

DA-271-DMSO

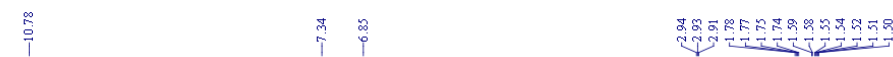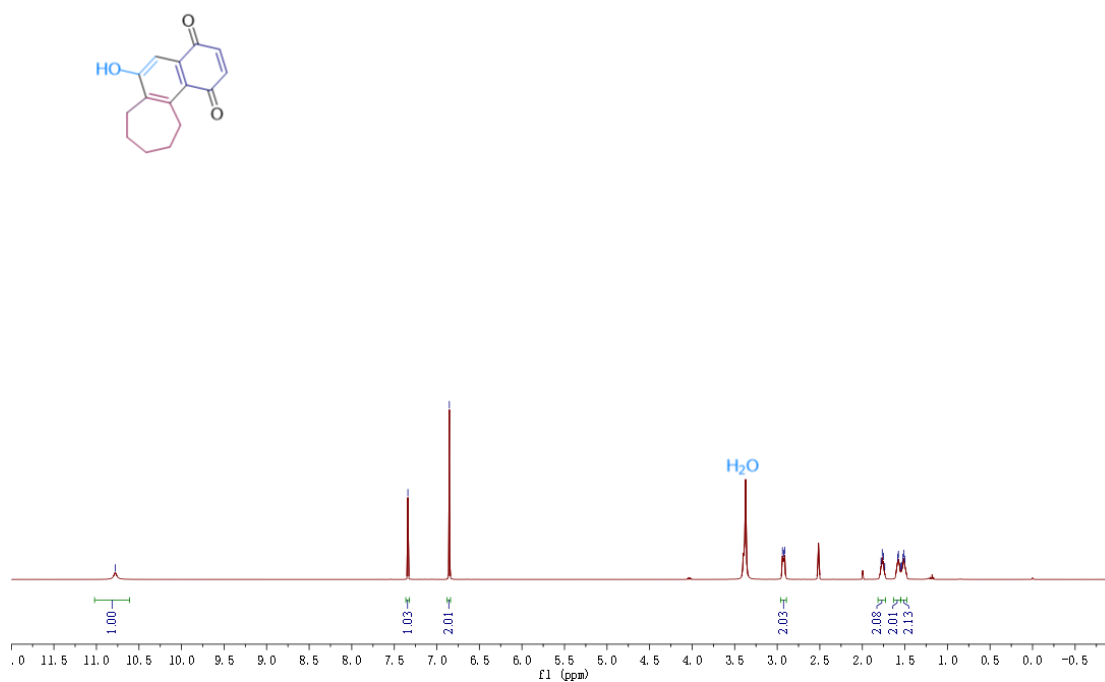

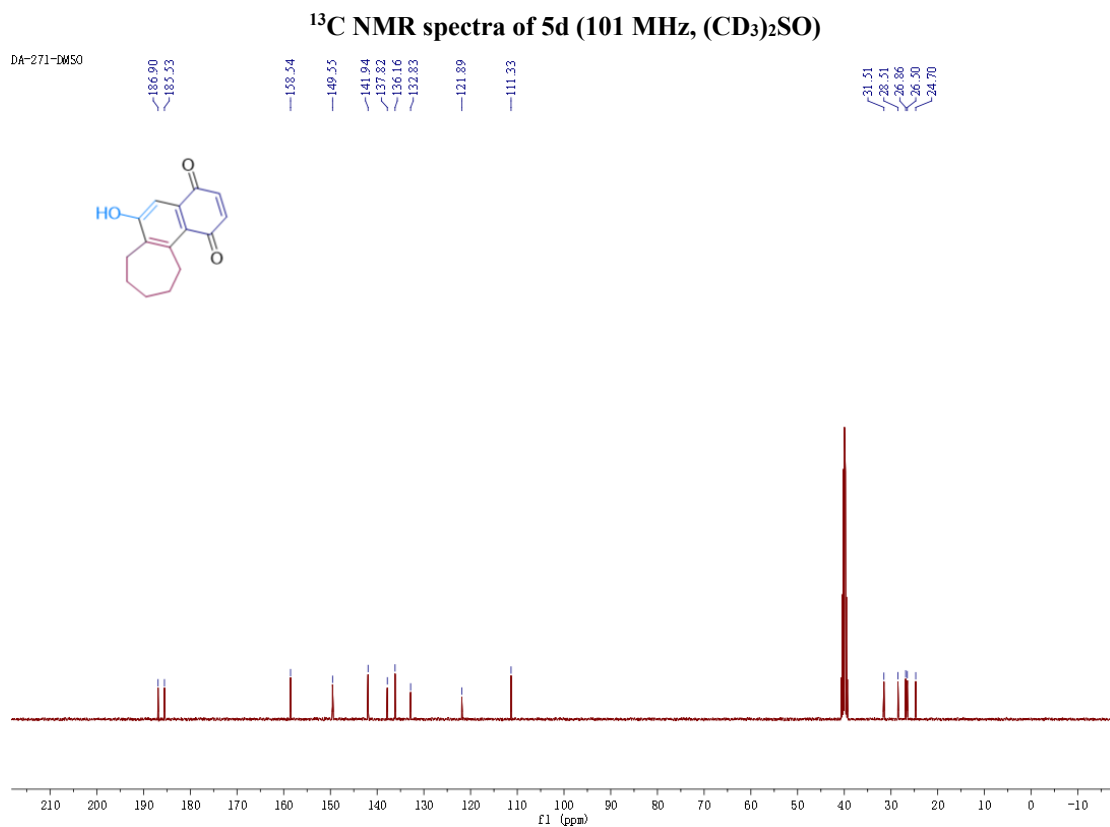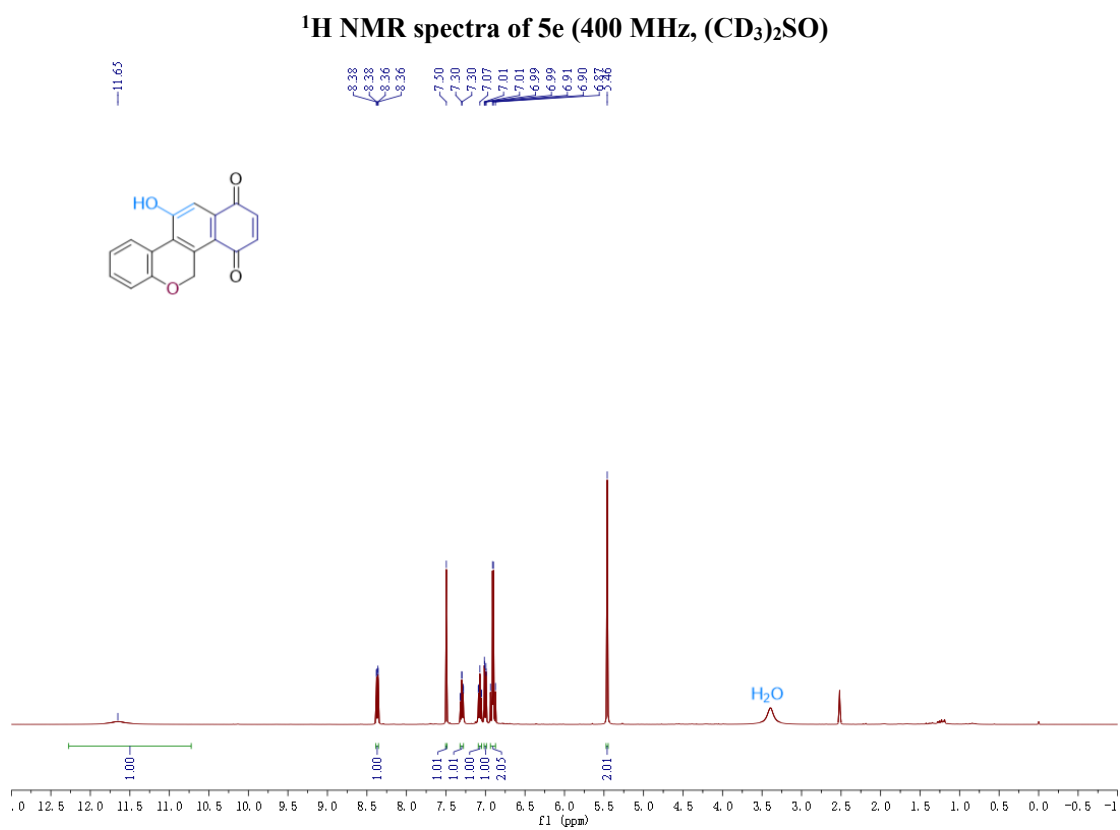

<sup>13</sup>C NMR spectra of 5e (101 MHz, (CD<sub>3</sub>)<sub>2</sub>SO)

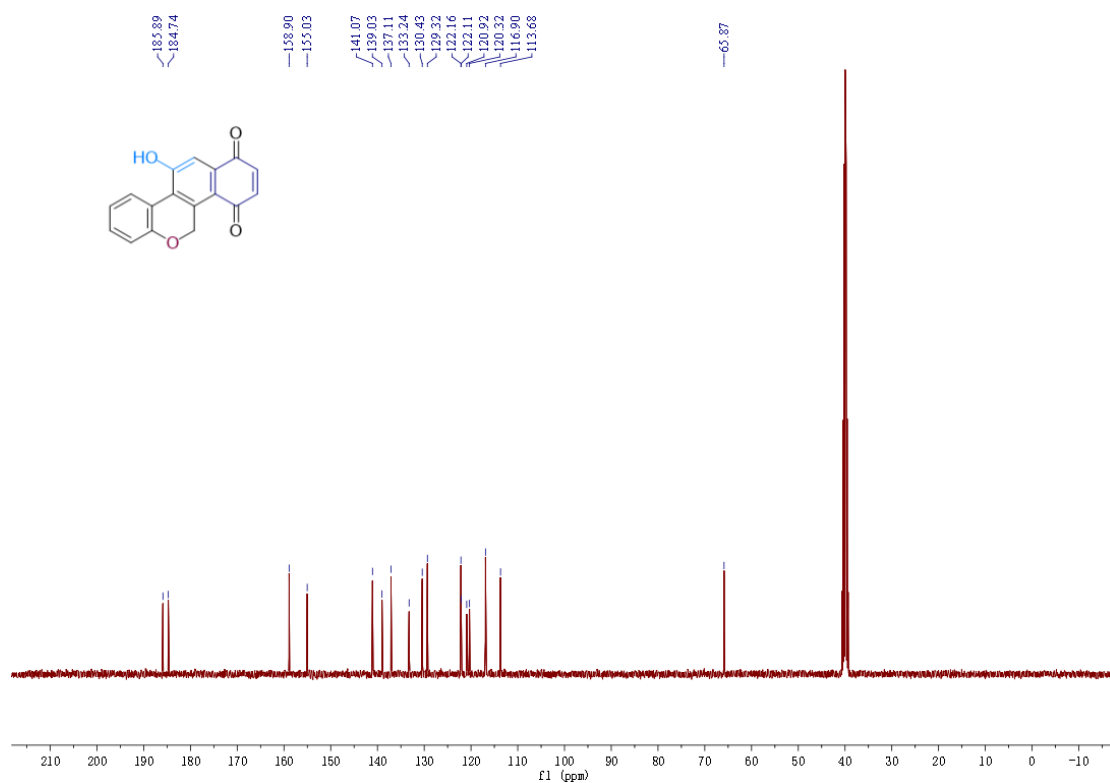

<sup>1</sup>H NMR spectra of 5f (400 MHz, (CD<sub>3</sub>)<sub>2</sub>SO)

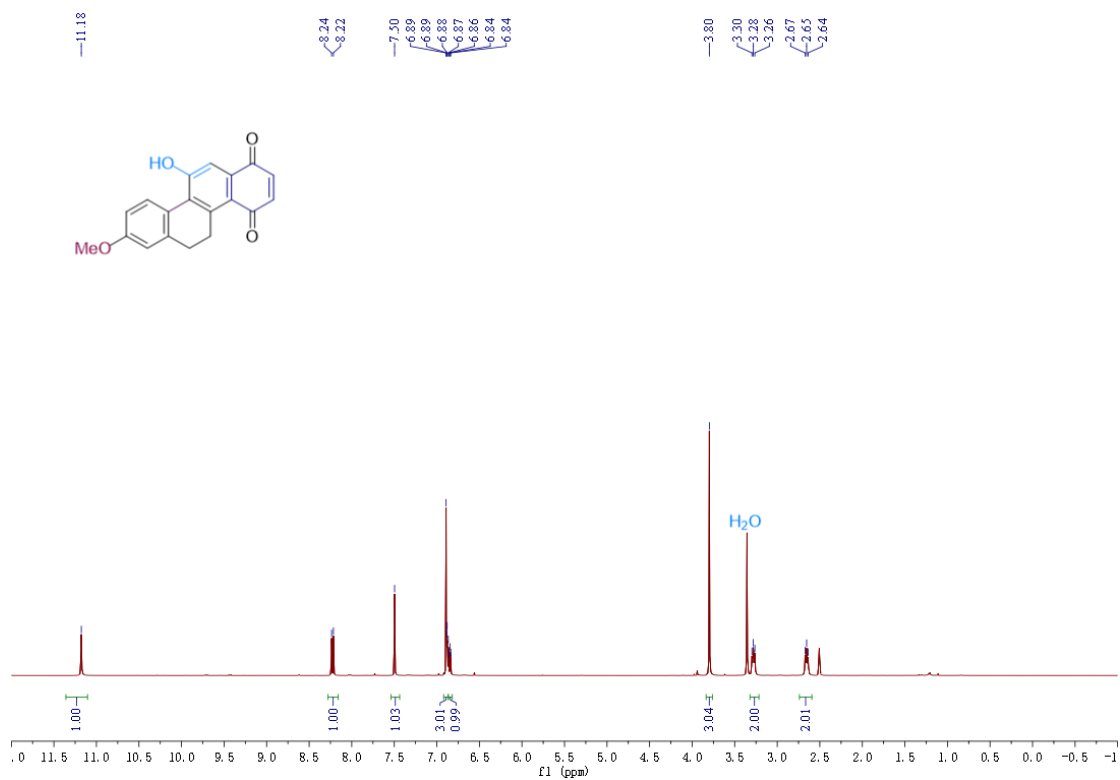

**<sup>13</sup>C NMR spectra of 5f (101 MHz, (CD<sub>3</sub>)<sub>2</sub>SO)**

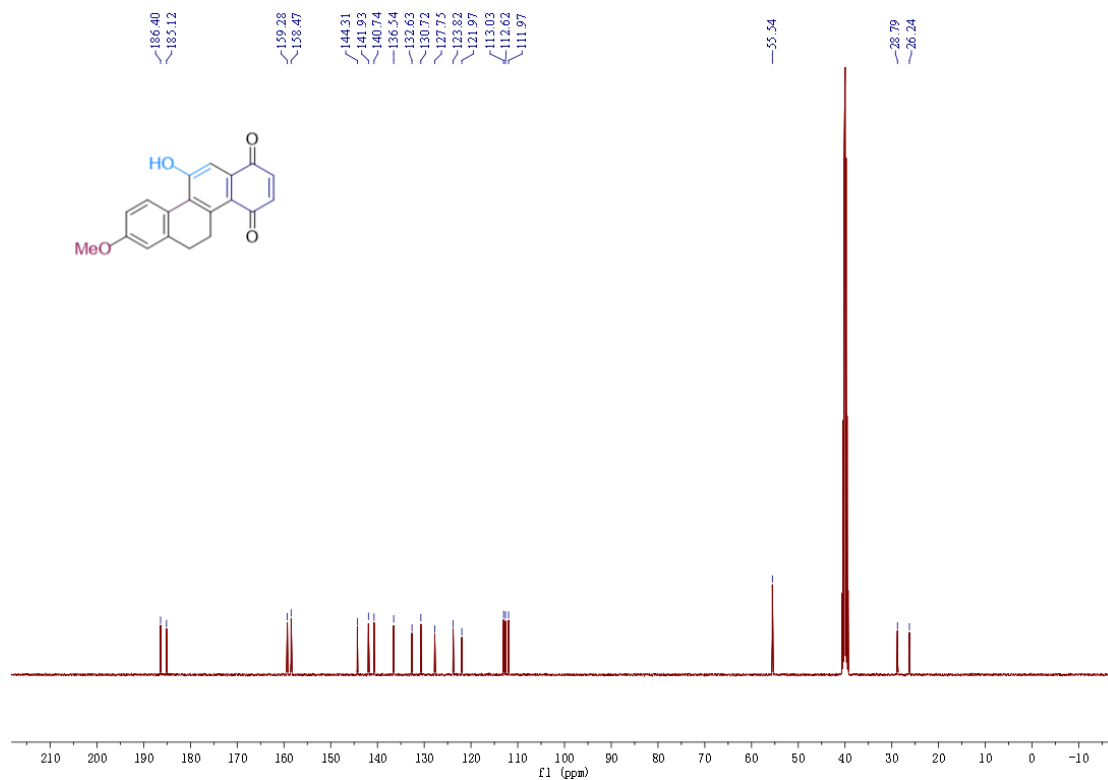

**<sup>1</sup>H NMR spectra of 5g (400 MHz, (CD<sub>3</sub>)<sub>2</sub>SO)**

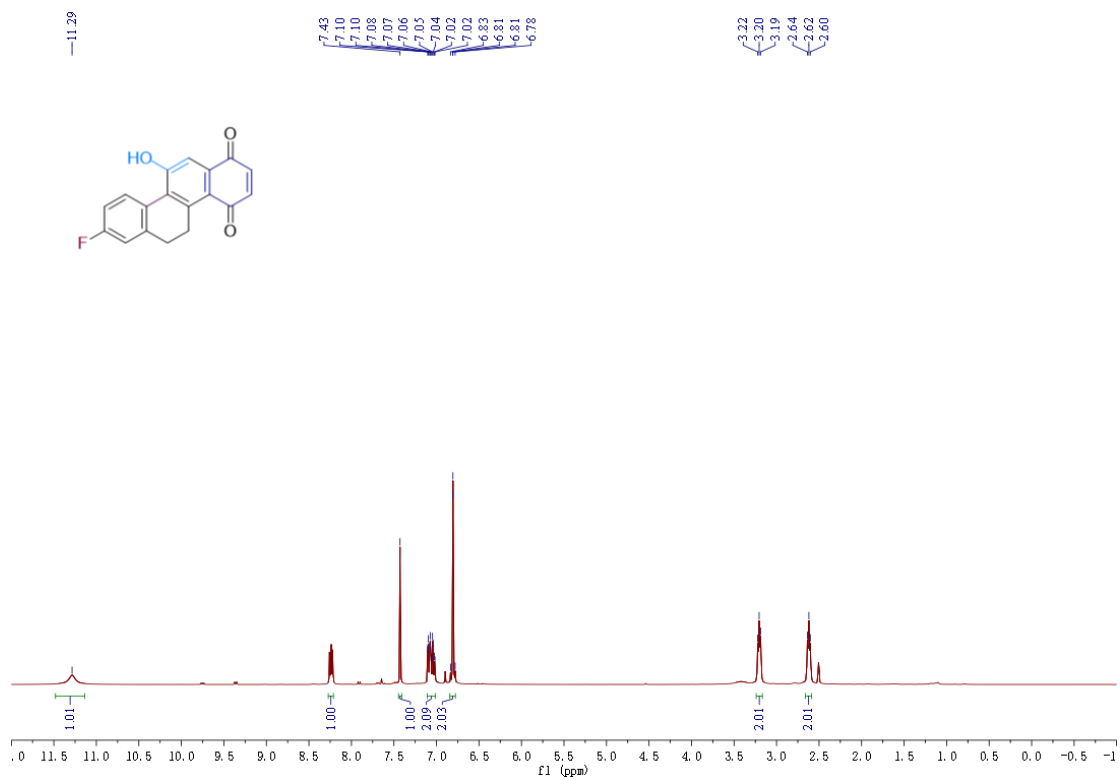

**<sup>13</sup>C NMR spectra of 5g (101 MHz, (CD<sub>3</sub>)<sub>2</sub>SO)**

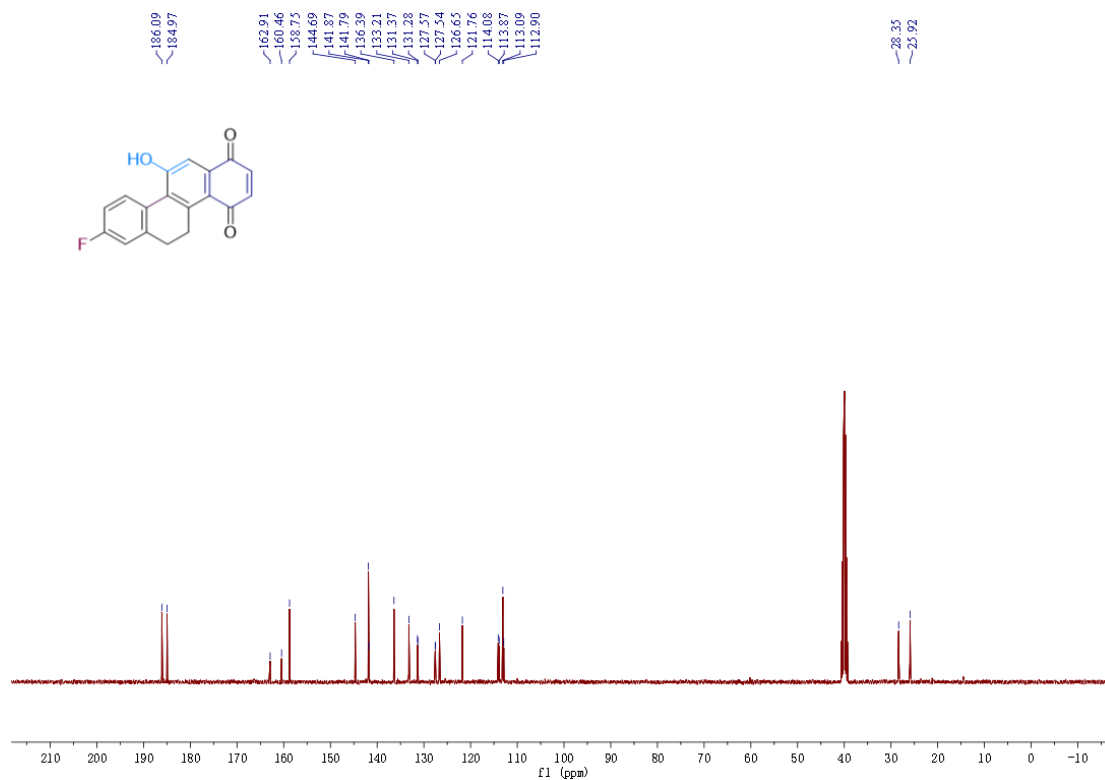

**<sup>19</sup>F NMR spectra of 5g (377 MHz, (CD<sub>3</sub>)<sub>2</sub>SO)**

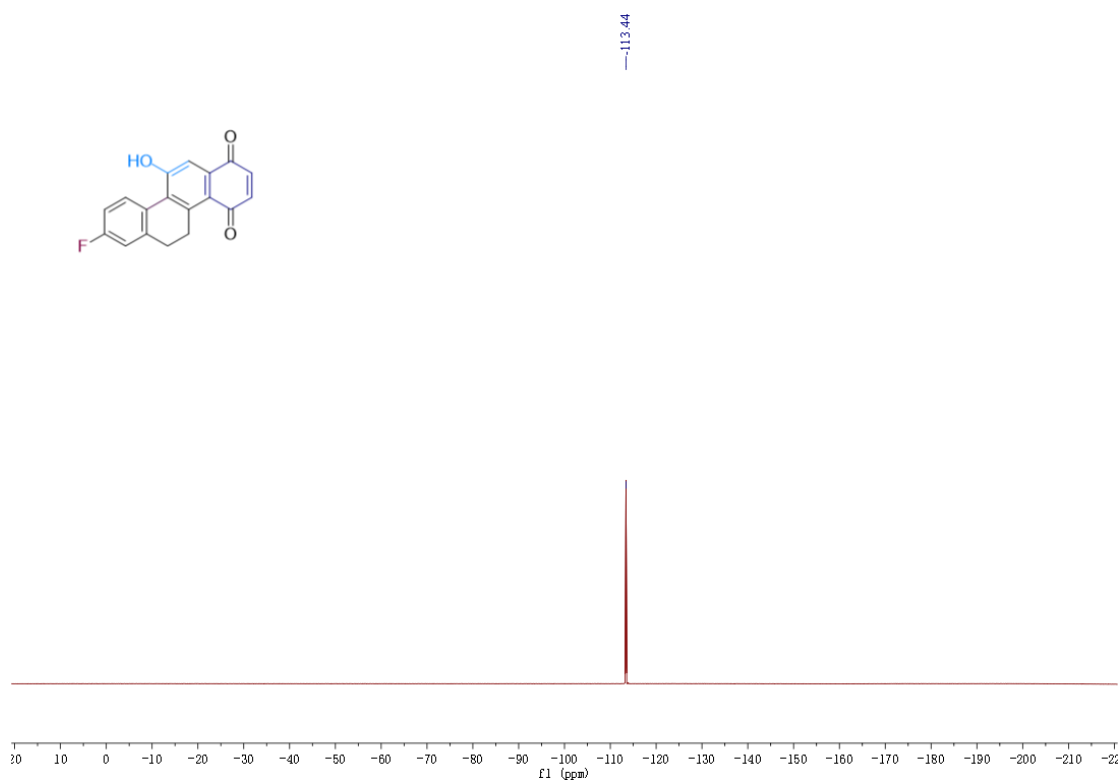

**<sup>1</sup>H NMR spectra of 5h (400 MHz, (CD<sub>3</sub>)<sub>2</sub>SO)**

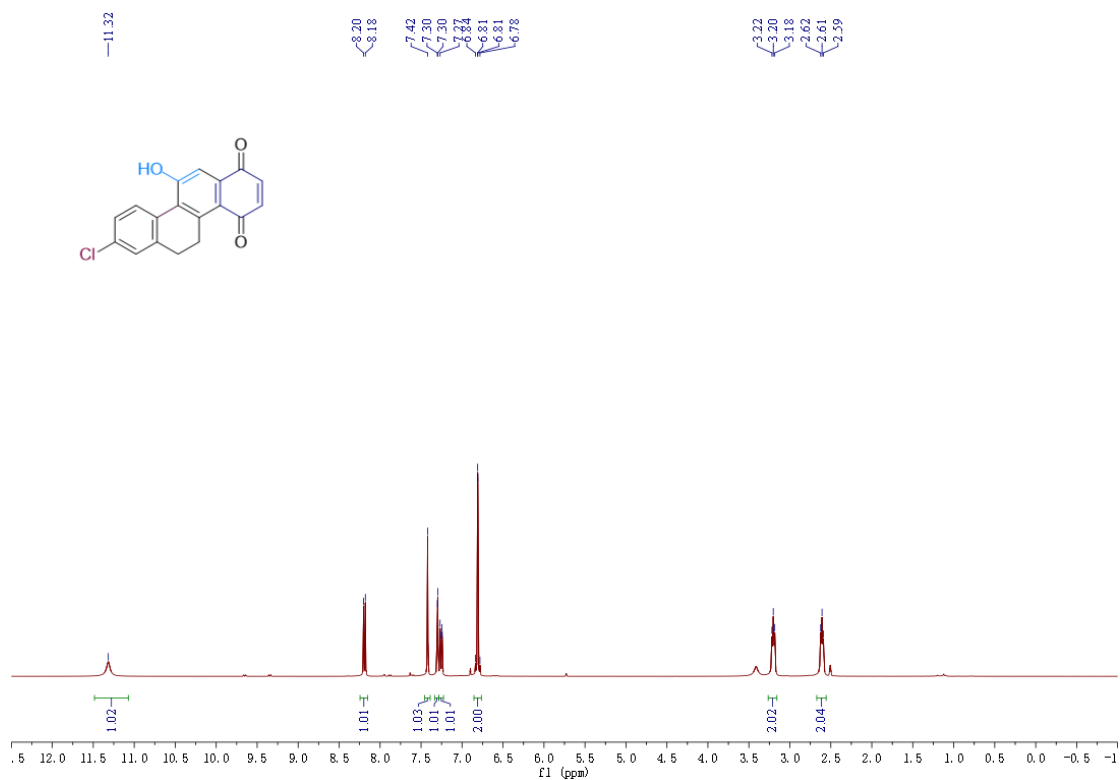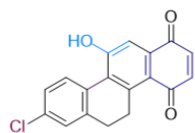

**<sup>13</sup>C NMR spectra of 5h (101 MHz, (CD<sub>3</sub>)<sub>2</sub>SO)**

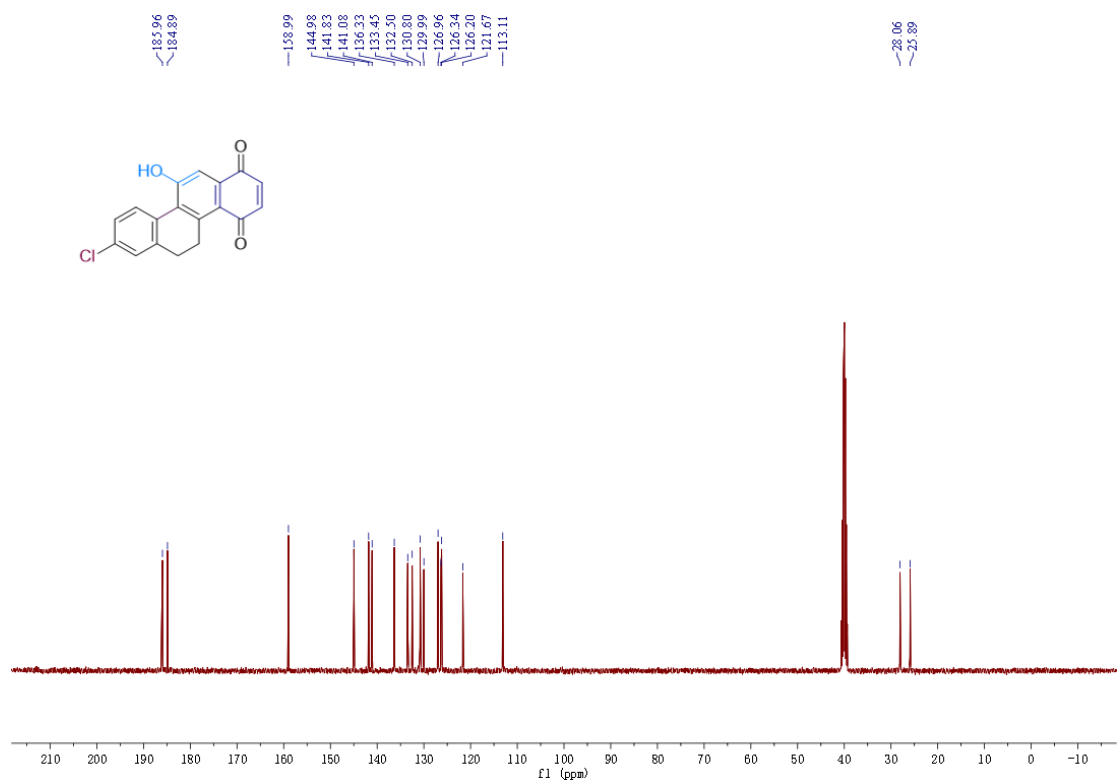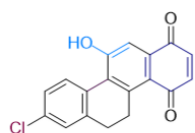



### <sup>1</sup>H NMR spectra of 5i (400 MHz, (CD<sub>3</sub>)<sub>2</sub>SO)

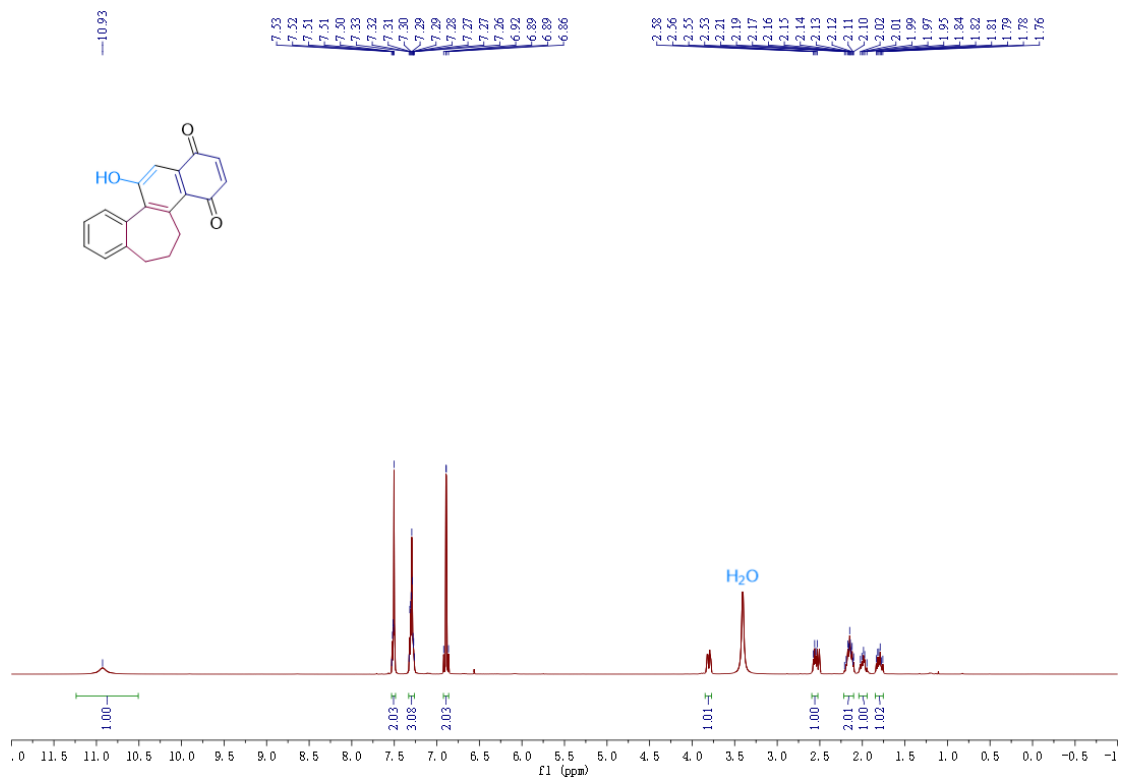

### <sup>13</sup>C NMR spectra of 5i (101 MHz, (CD<sub>3</sub>)<sub>2</sub>SO)

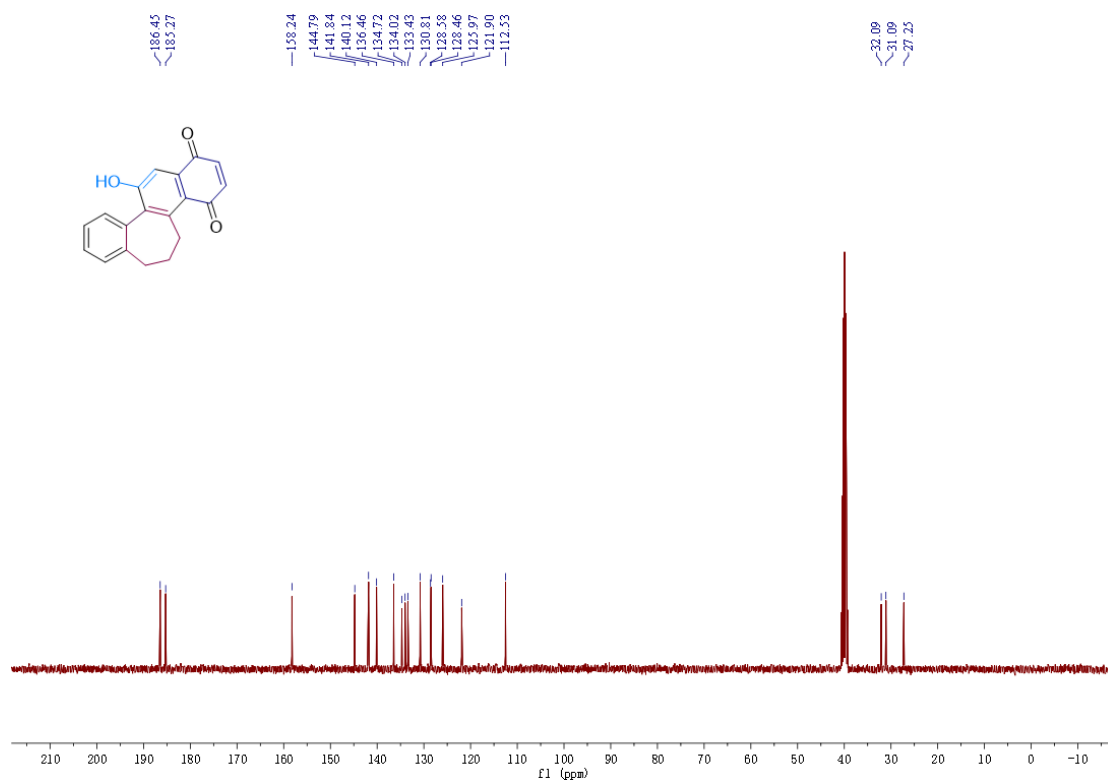

### <sup>1</sup>H NMR spectra of 6a (400 MHz, (CD<sub>3</sub>)<sub>2</sub>SO)

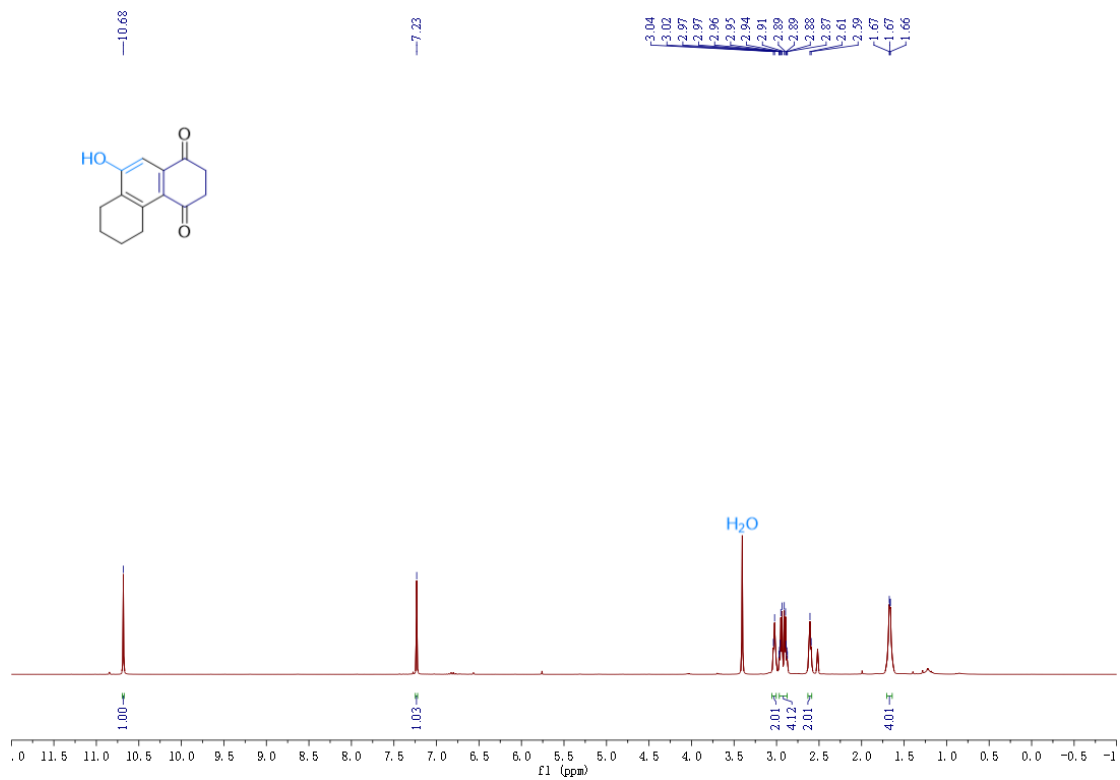

### <sup>13</sup>C NMR spectra of 6a (101 MHz, (CD<sub>3</sub>)<sub>2</sub>SO)

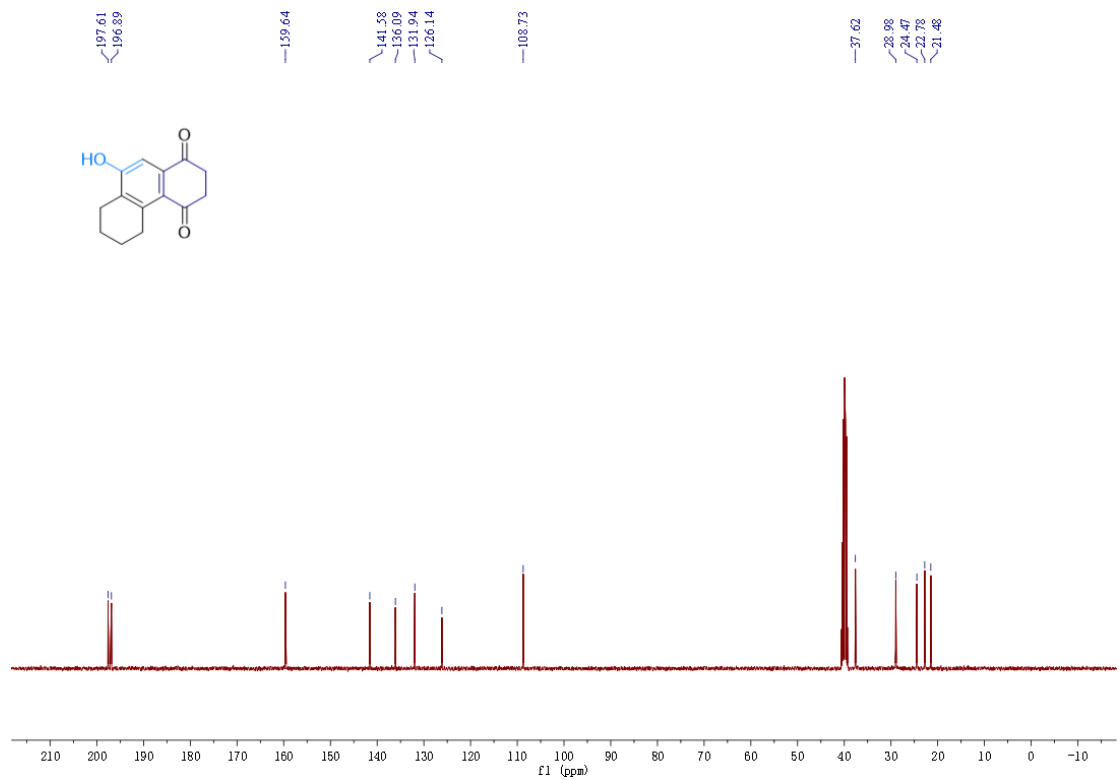

### <sup>1</sup>H NMR spectra of 6b (400 MHz, (CD<sub>3</sub>)<sub>2</sub>SO)

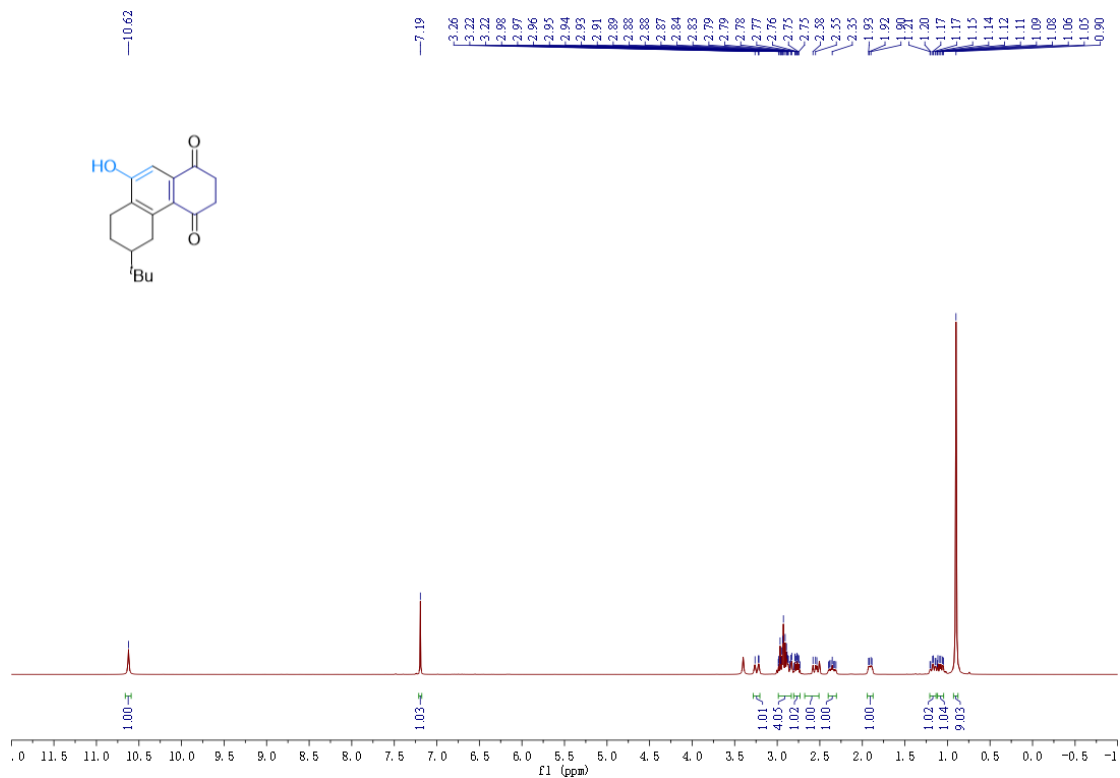

### <sup>13</sup>C NMR spectra of 6b (101 MHz, (CD<sub>3</sub>)<sub>2</sub>SO)

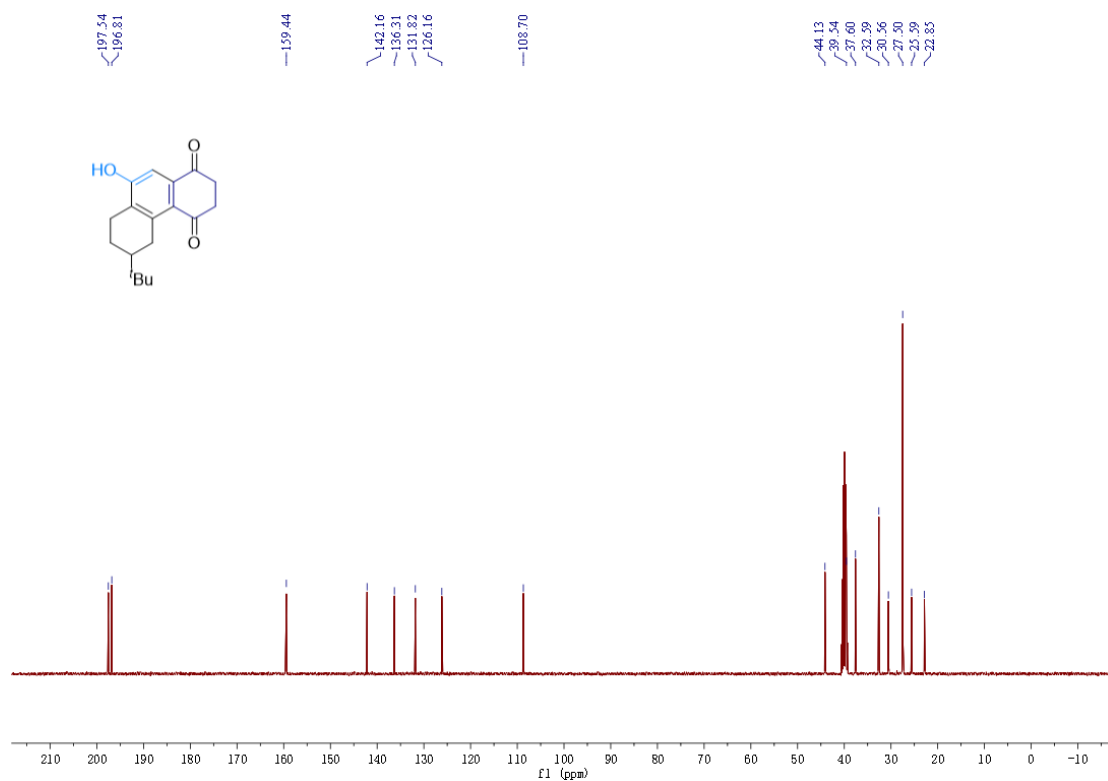

### $^1\text{H}$ NMR spectra of 6c (400 MHz, $(\text{CD}_3)_2\text{SO}$ )

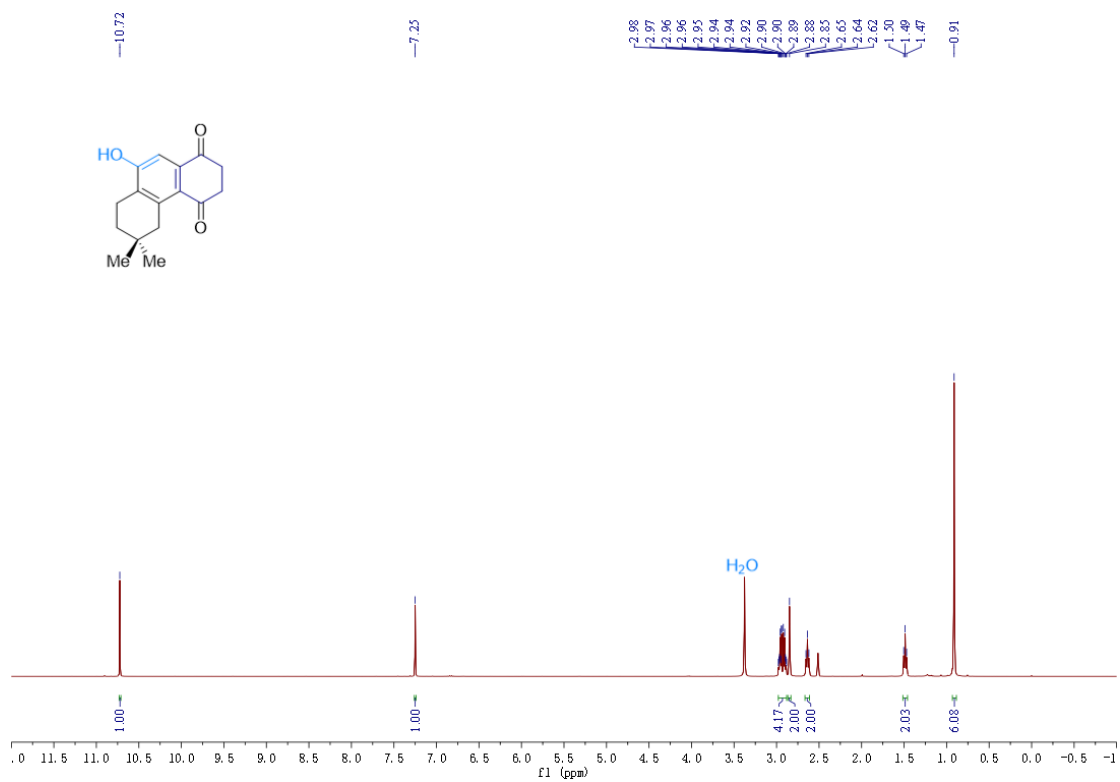

### $^{13}\text{C}$ NMR spectra of 6c (101 MHz, $(\text{CD}_3)_2\text{SO}$ )

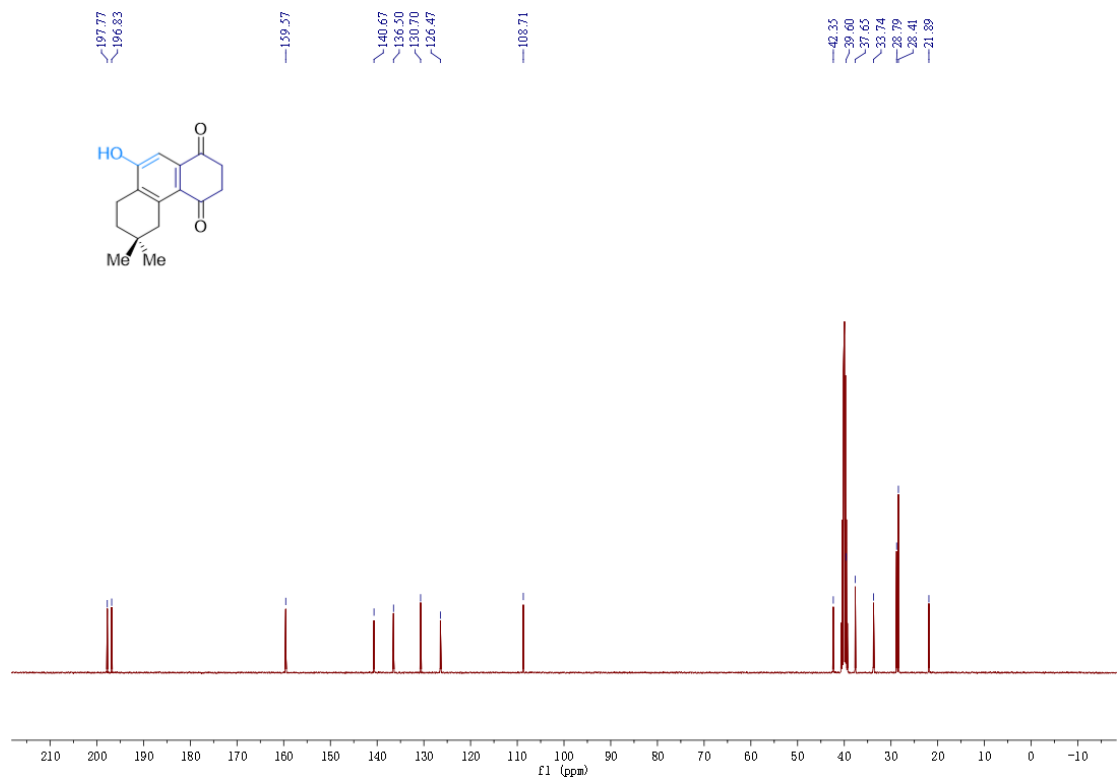

### <sup>1</sup>H NMR spectra of 6d (400 MHz, (CD<sub>3</sub>)<sub>2</sub>SO)

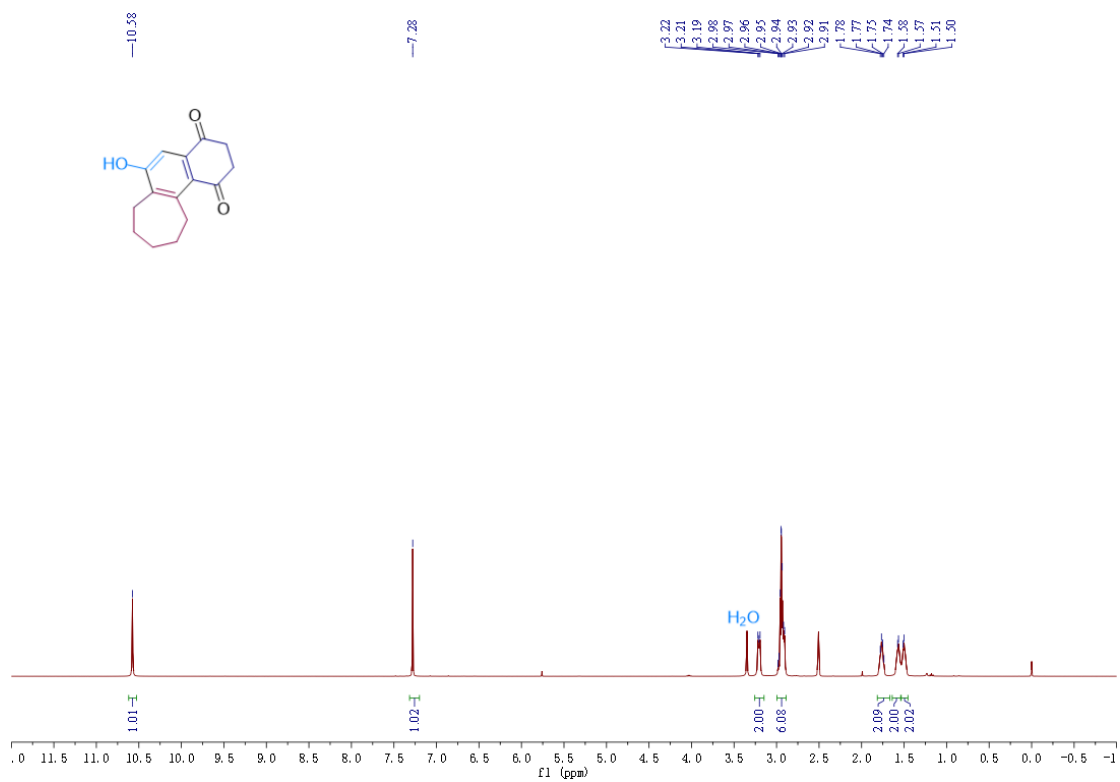

### <sup>13</sup>C NMR spectra of 6d (101 MHz, (CD<sub>3</sub>)<sub>2</sub>SO)

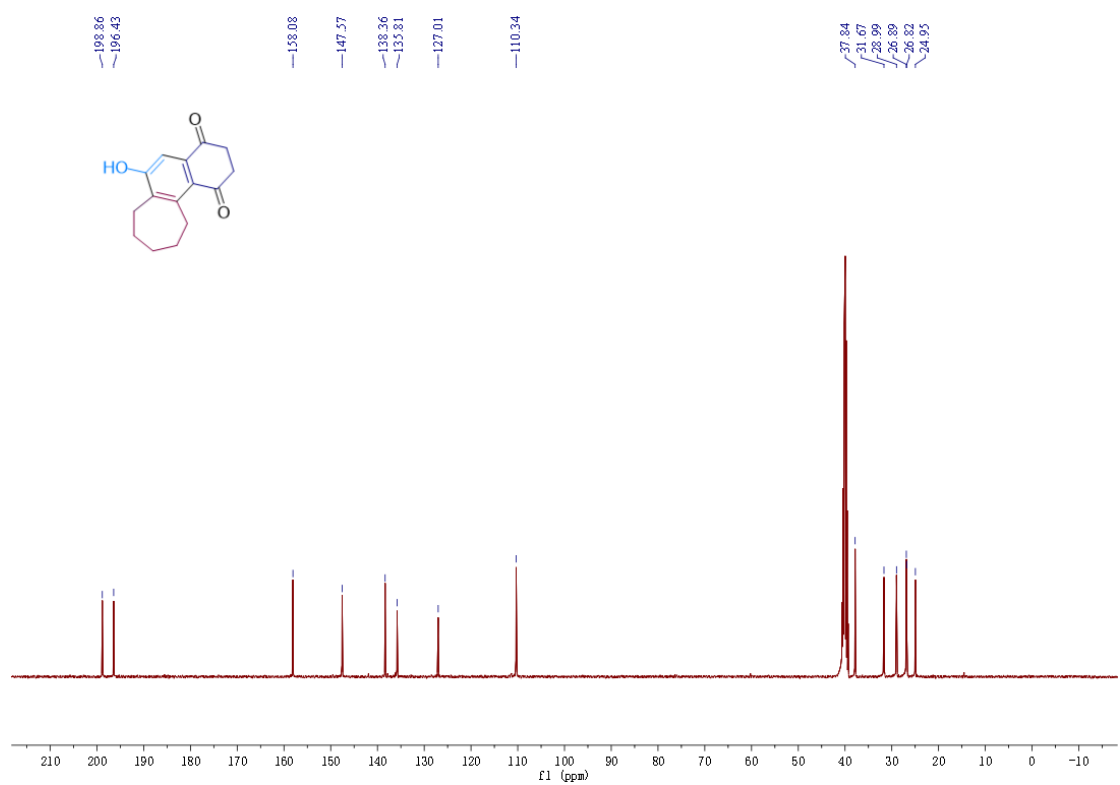

<sup>1</sup>H NMR spectra of 6e (400 MHz, (CD<sub>3</sub>)<sub>2</sub>SO)

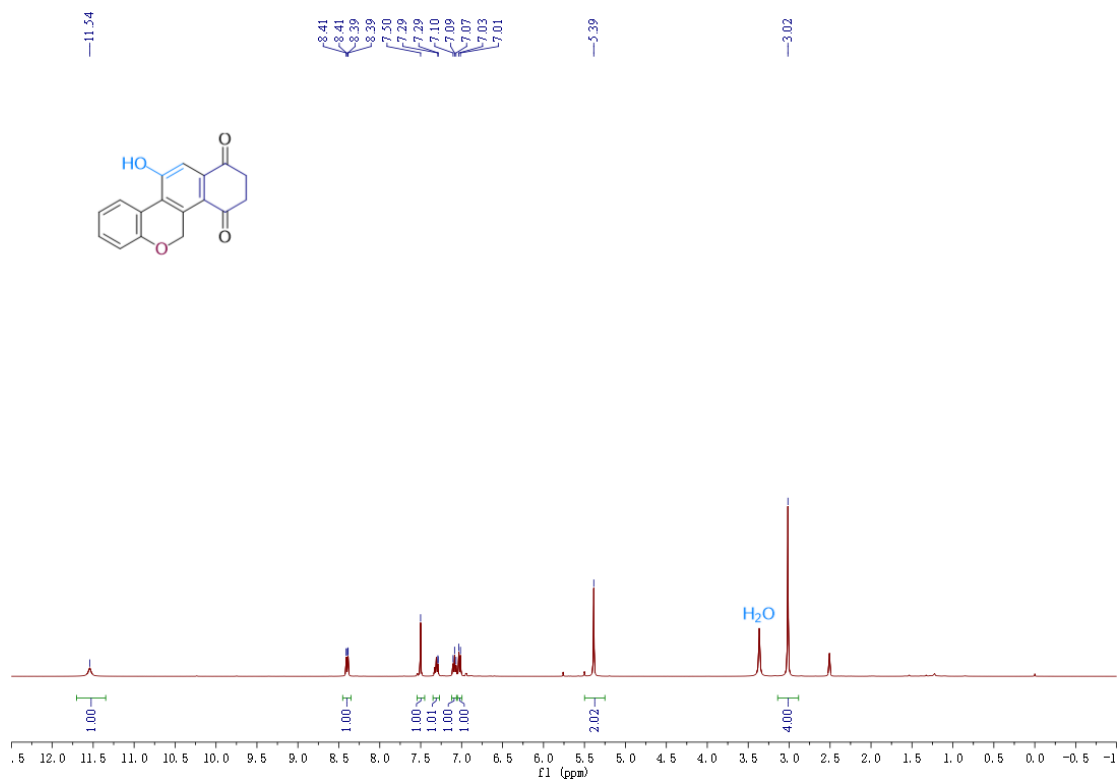

<sup>13</sup>C NMR spectra of 6e (101 MHz, (CD<sub>3</sub>)<sub>2</sub>SO)

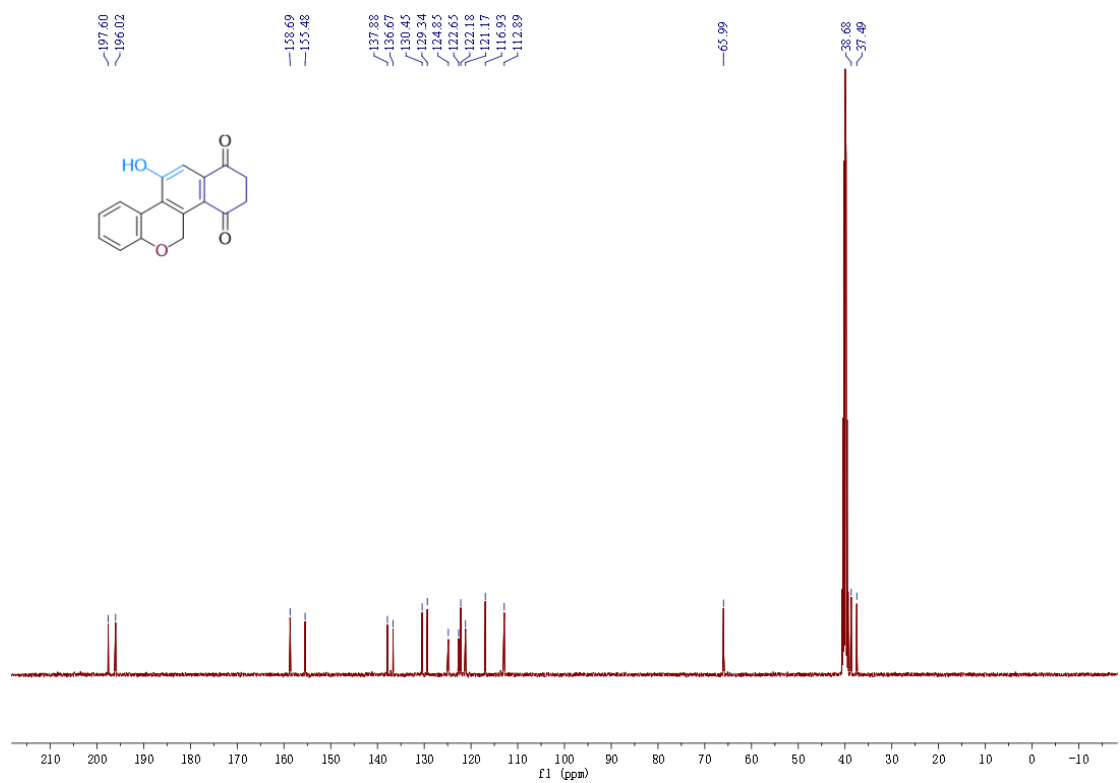

### <sup>1</sup>H NMR spectra of 6f (400 MHz, (CD<sub>3</sub>)<sub>2</sub>SO)

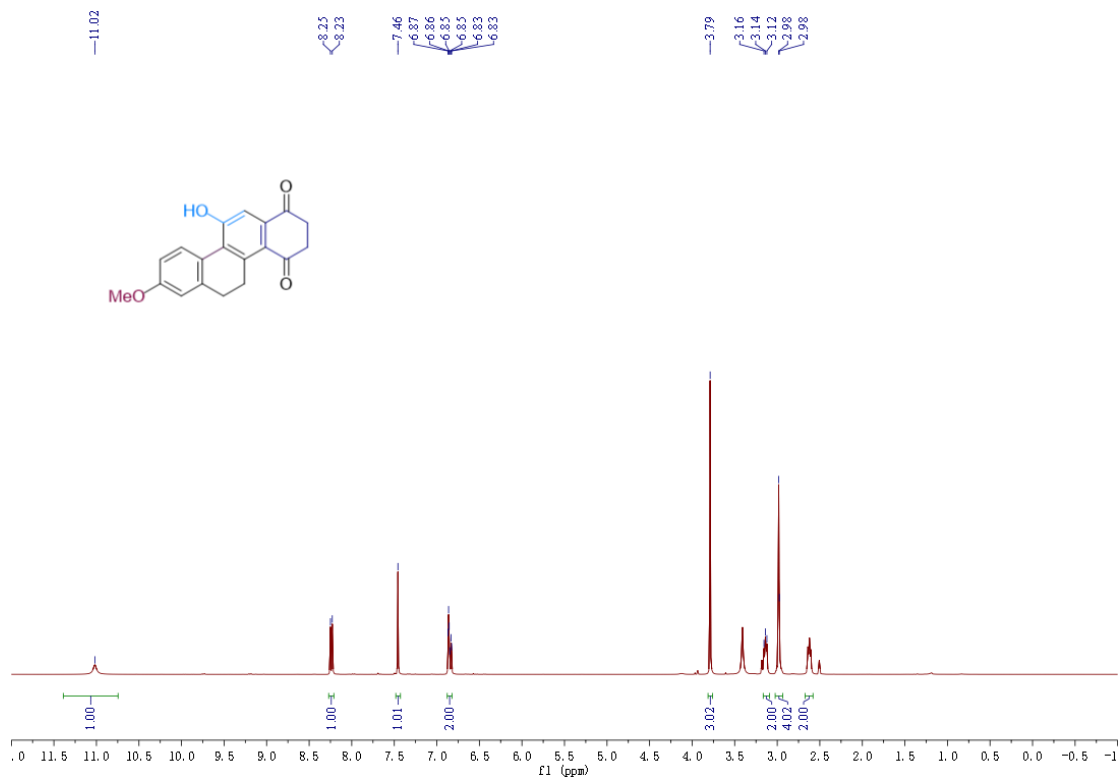

### <sup>13</sup>C NMR spectra of 6f (101 MHz, (CD<sub>3</sub>)<sub>2</sub>SO)

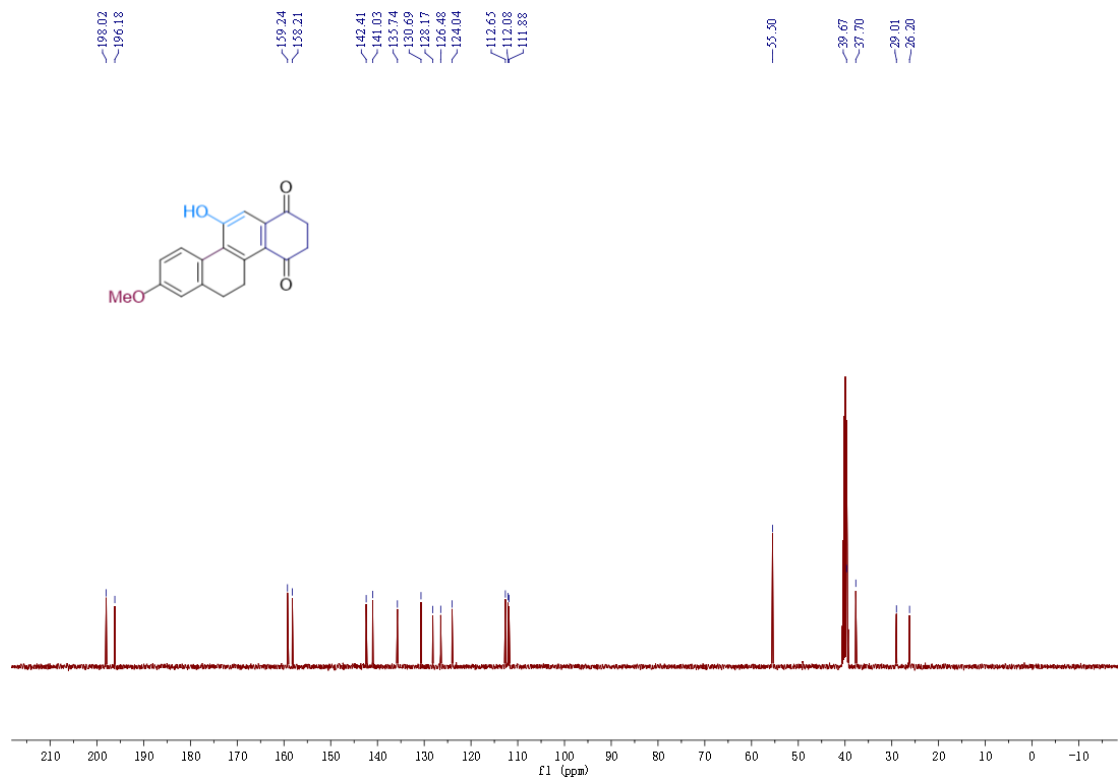

### <sup>1</sup>H NMR spectra of 6g (400 MHz, (CD<sub>3</sub>)<sub>2</sub>SO)

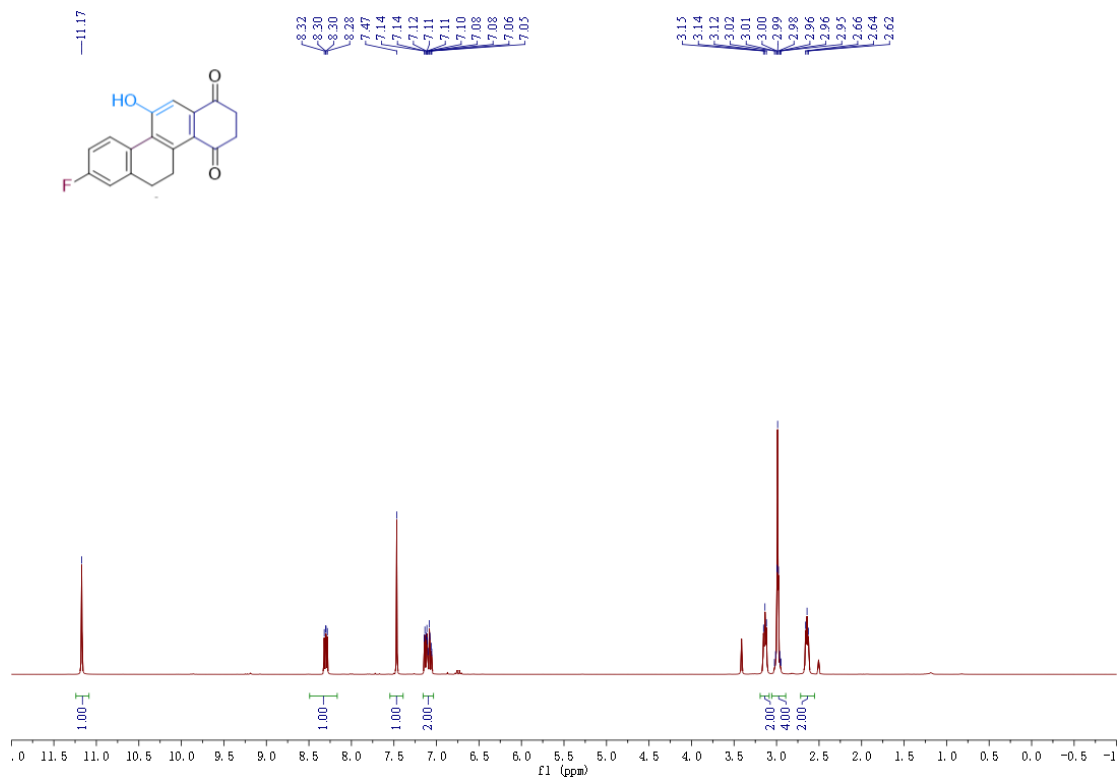

### <sup>13</sup>C NMR spectra of 6g (101 MHz, (CD<sub>3</sub>)<sub>2</sub>SO)

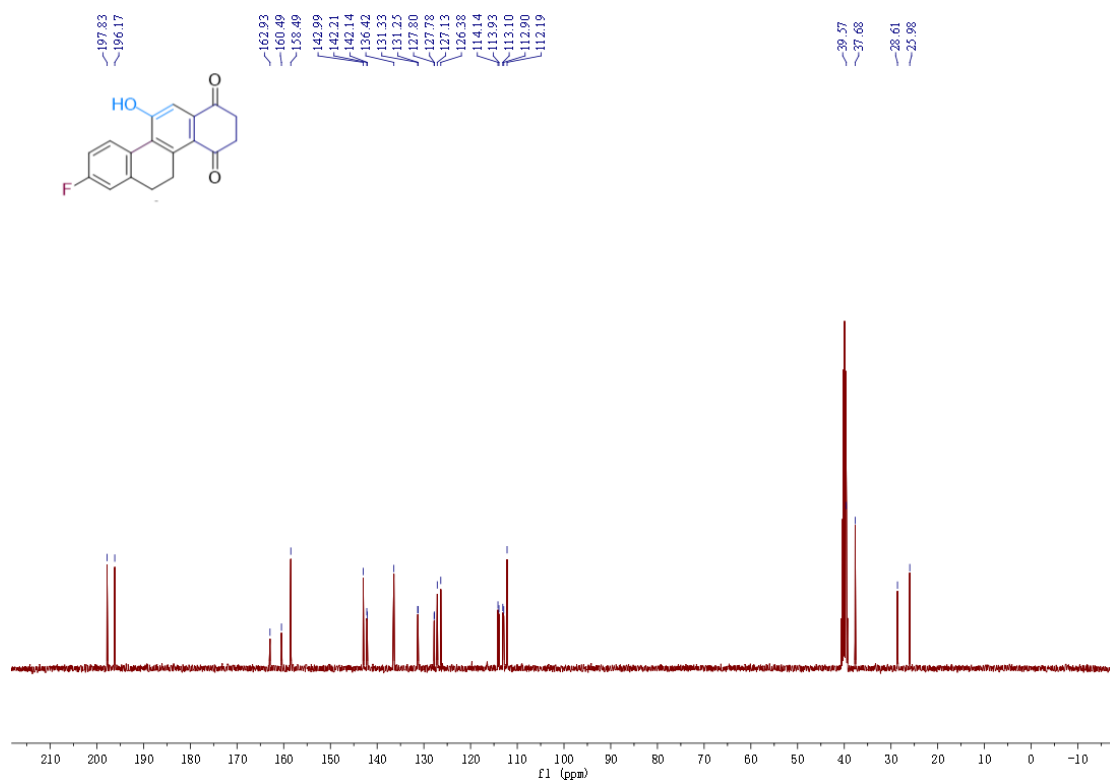



### $^{19}\text{F}$ NMR spectra of 6g (377 MHz, $(\text{CD}_3)_2\text{SO}$ )

DA-BQ-4-2-DMSO

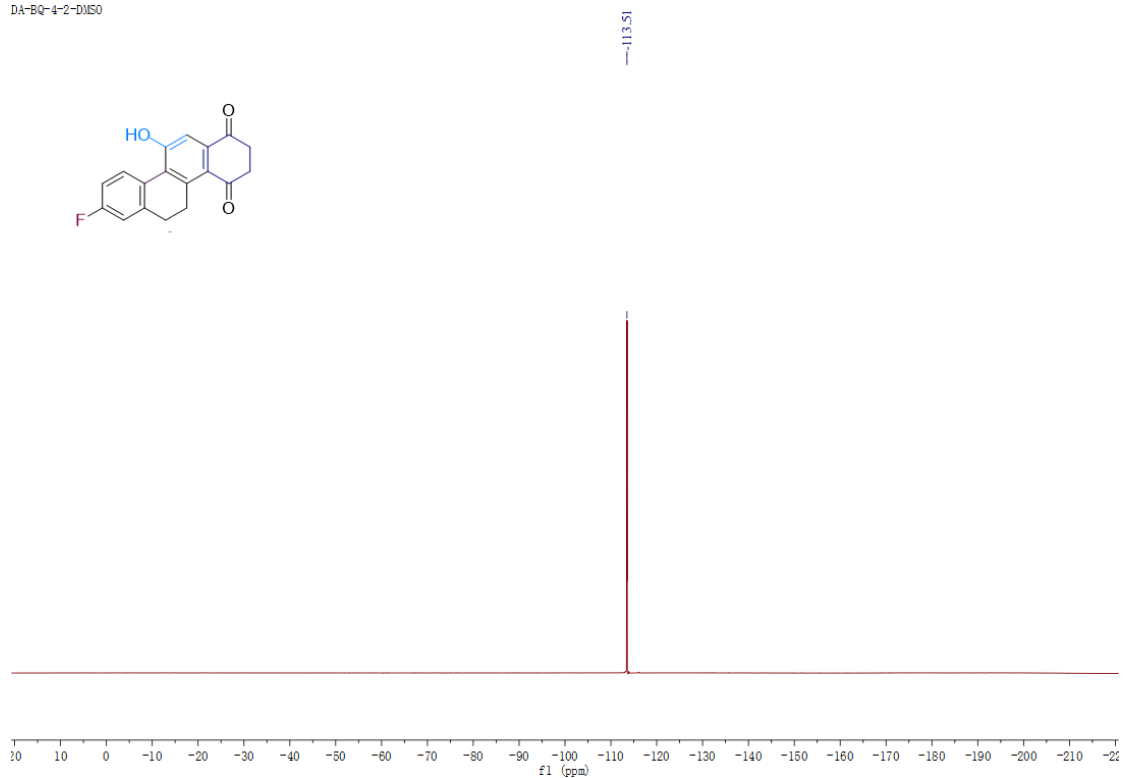

### $^1\text{H}$ NMR spectra of 6h (400 MHz, $(\text{CD}_3)_2\text{SO}$ )

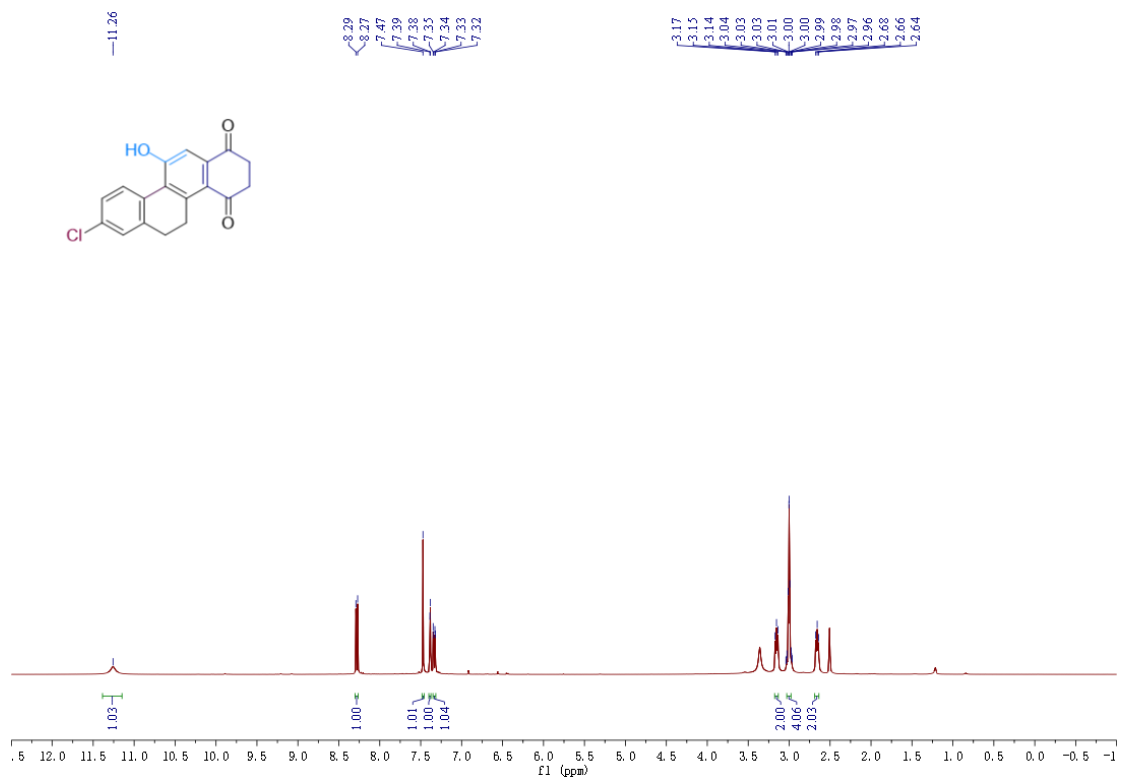

<sup>13</sup>C NMR spectra of 6h (101 MHz, (CD<sub>3</sub>)<sub>2</sub>SO)

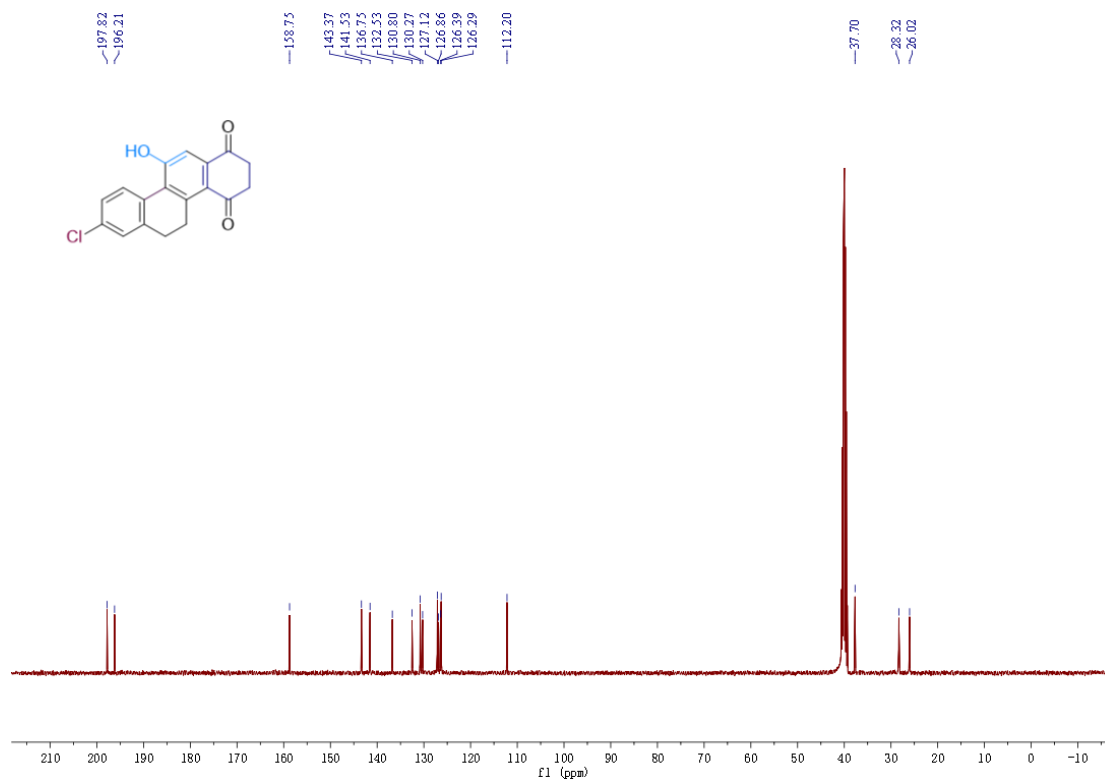

<sup>1</sup>H NMR spectra of 6i (400 MHz, (CD<sub>3</sub>)<sub>2</sub>SO)

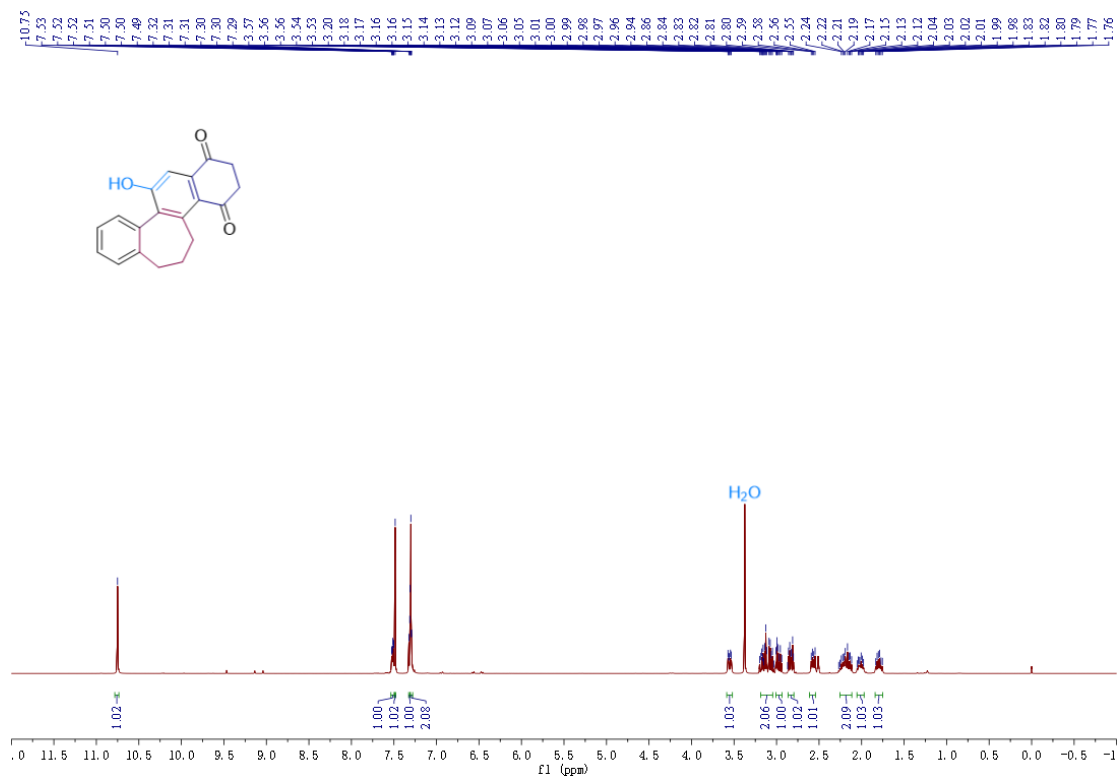

### $^{13}\text{C}$ NMR spectra of 6i (101 MHz, $(\text{CD}_3)_2\text{SO}$ )

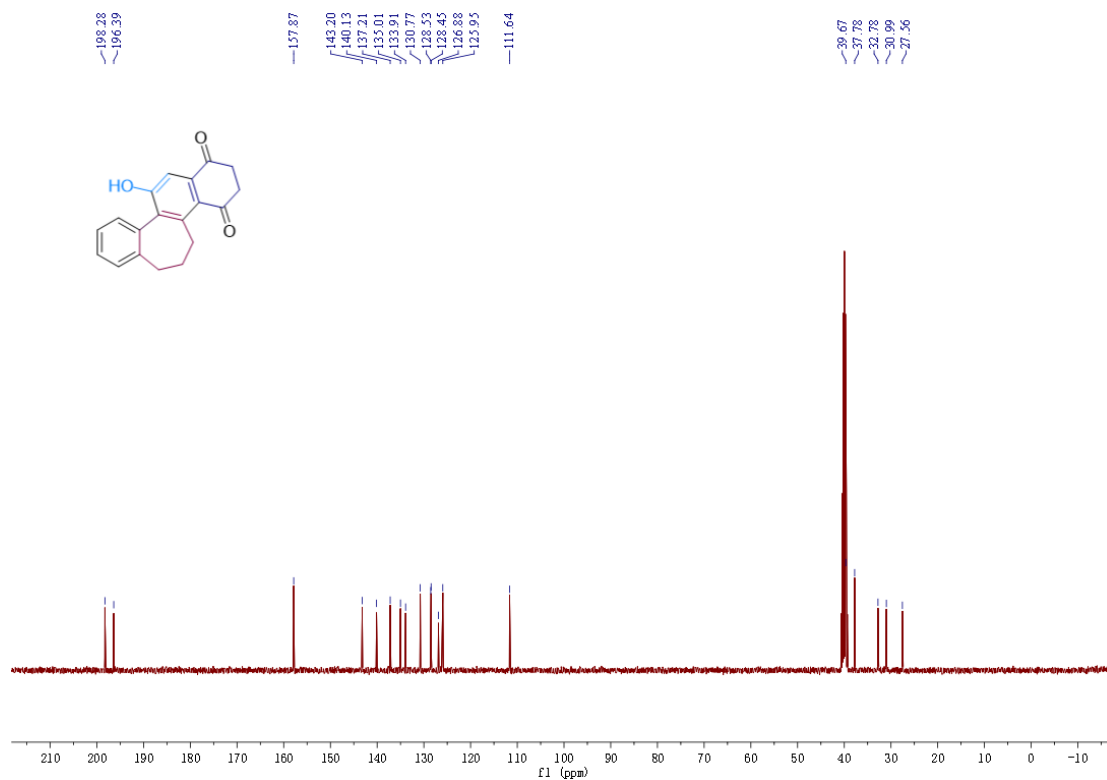

### $^1\text{H}$ NMR spectra of 7a (400 MHz, $(\text{CD}_3)_2\text{SO}$ )

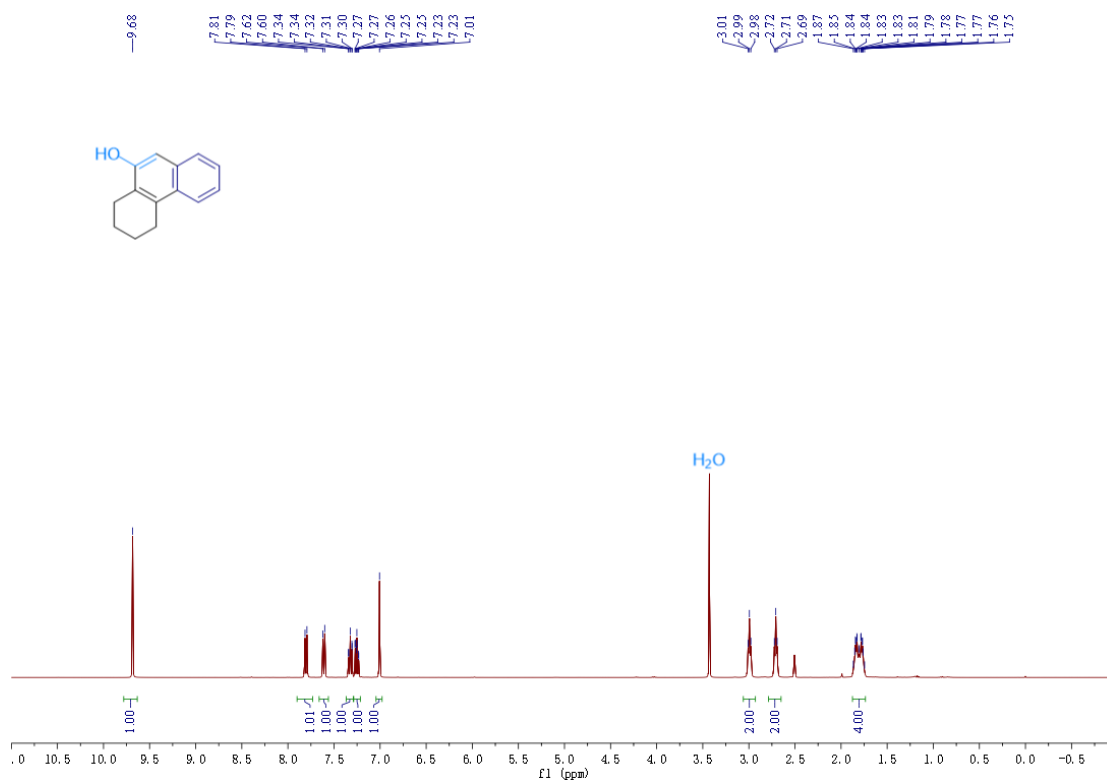

<sup>13</sup>C NMR spectra of 7a (101 MHz, (CD<sub>3</sub>)<sub>2</sub>SO)

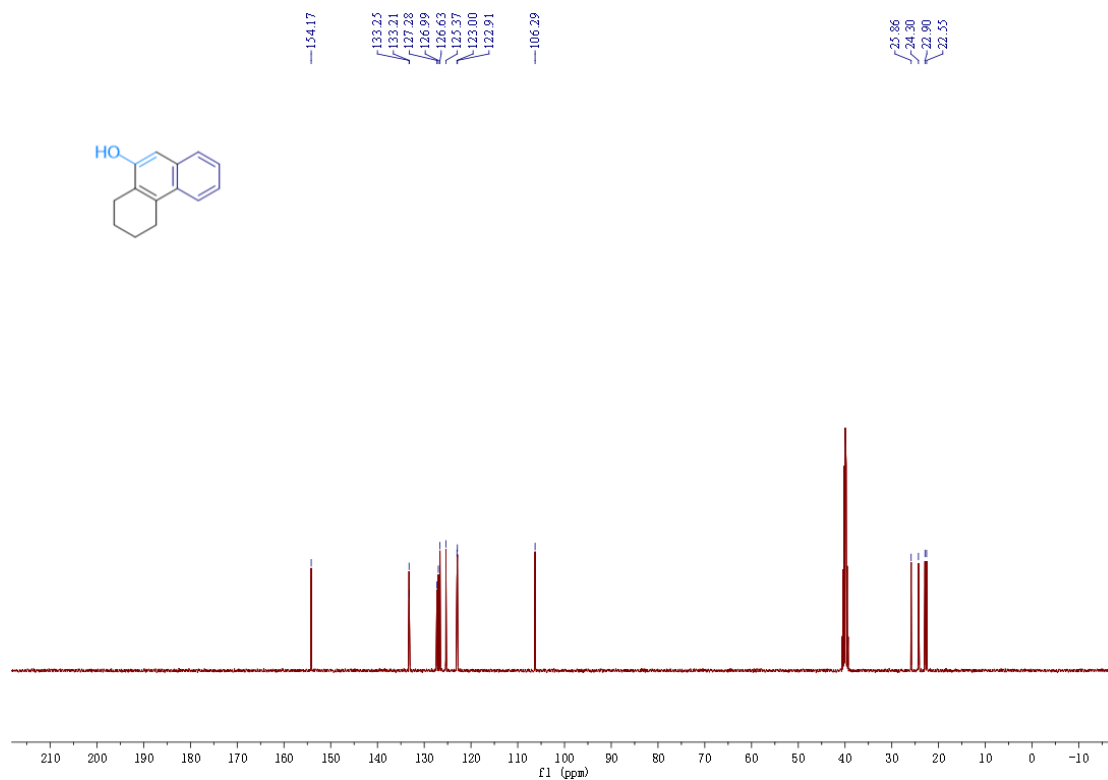

<sup>1</sup>H NMR spectra of 7b (400 MHz, (CD<sub>3</sub>)<sub>2</sub>SO)

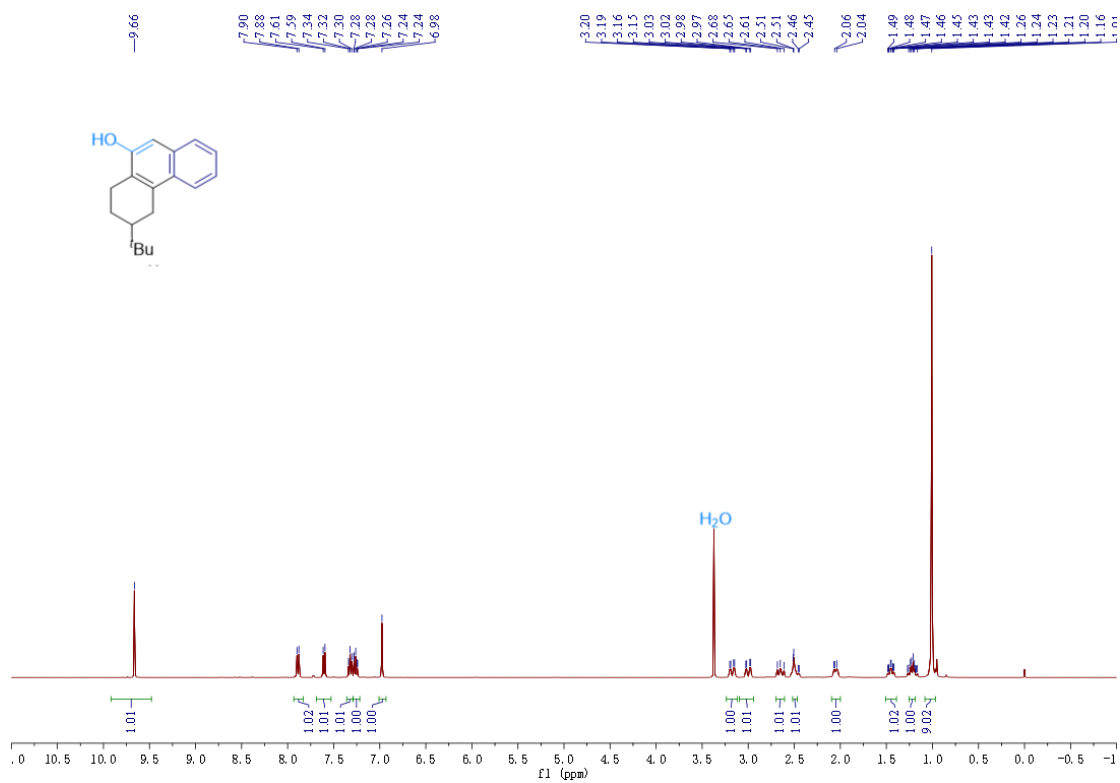

**<sup>13</sup>C NMR spectra of 7b (101 MHz, (CD<sub>3</sub>)<sub>2</sub>SO)**

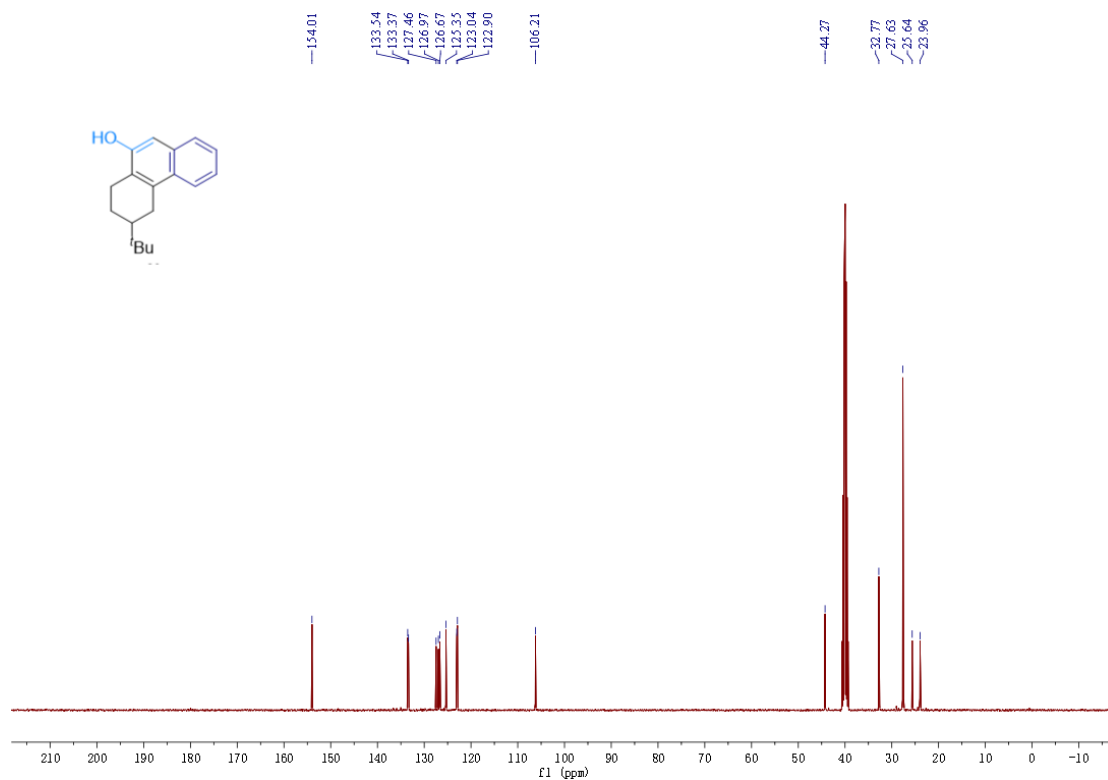

**<sup>1</sup>H NMR spectra of 7c (400 MHz, (CD<sub>3</sub>)<sub>2</sub>SO)**

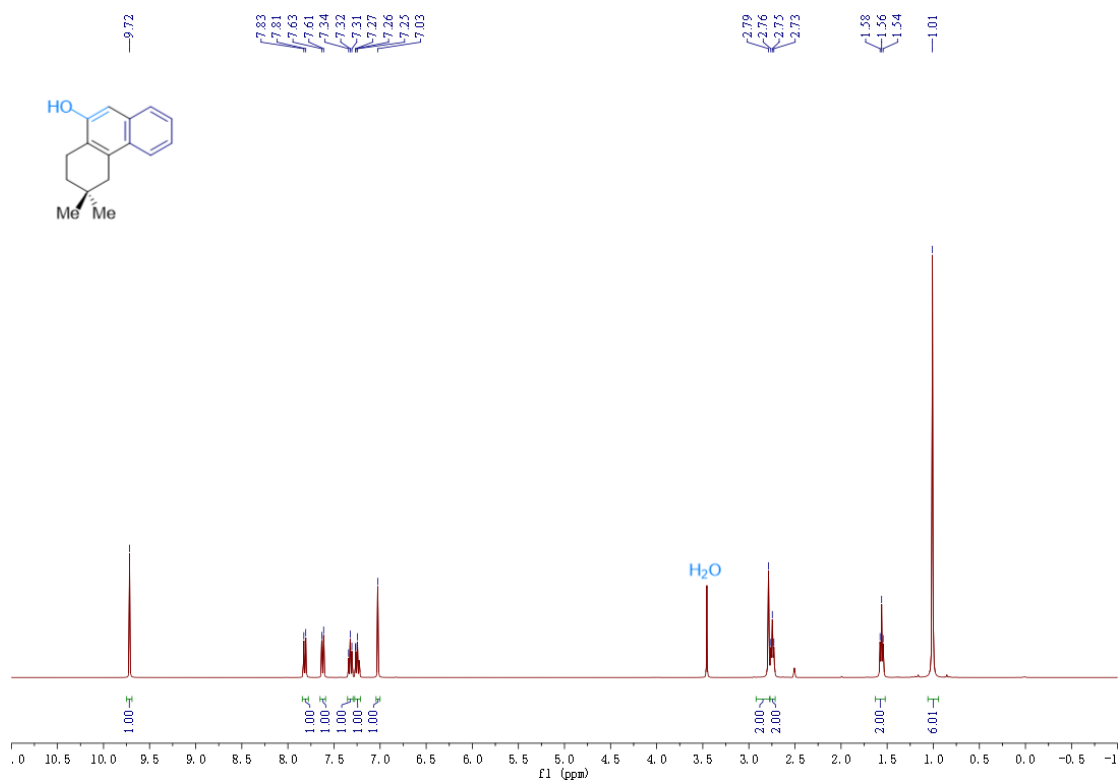

**<sup>13</sup>C NMR spectra of 7c (101 MHz, (CD<sub>3</sub>)<sub>2</sub>SO)**

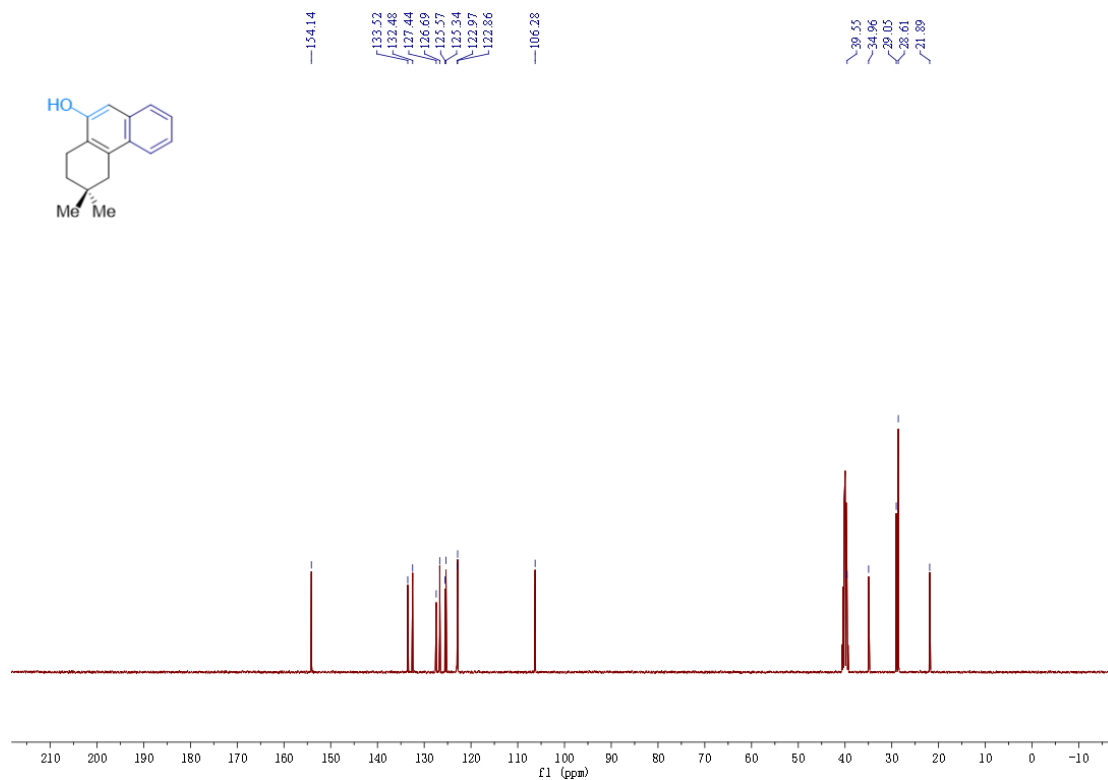

**<sup>1</sup>H NMR spectra of 7d (400 MHz, (CD<sub>3</sub>)<sub>2</sub>SO)**

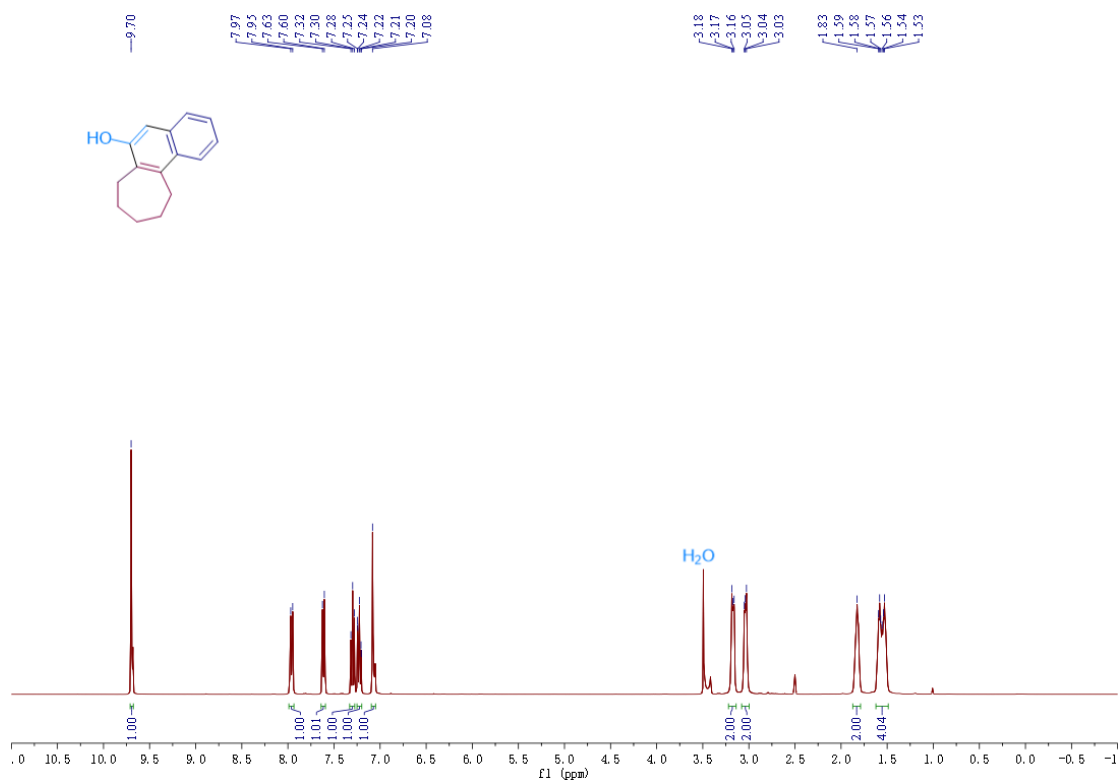

**<sup>13</sup>C NMR spectra of 7d (101 MHz, (CD<sub>3</sub>)<sub>2</sub>SO)**

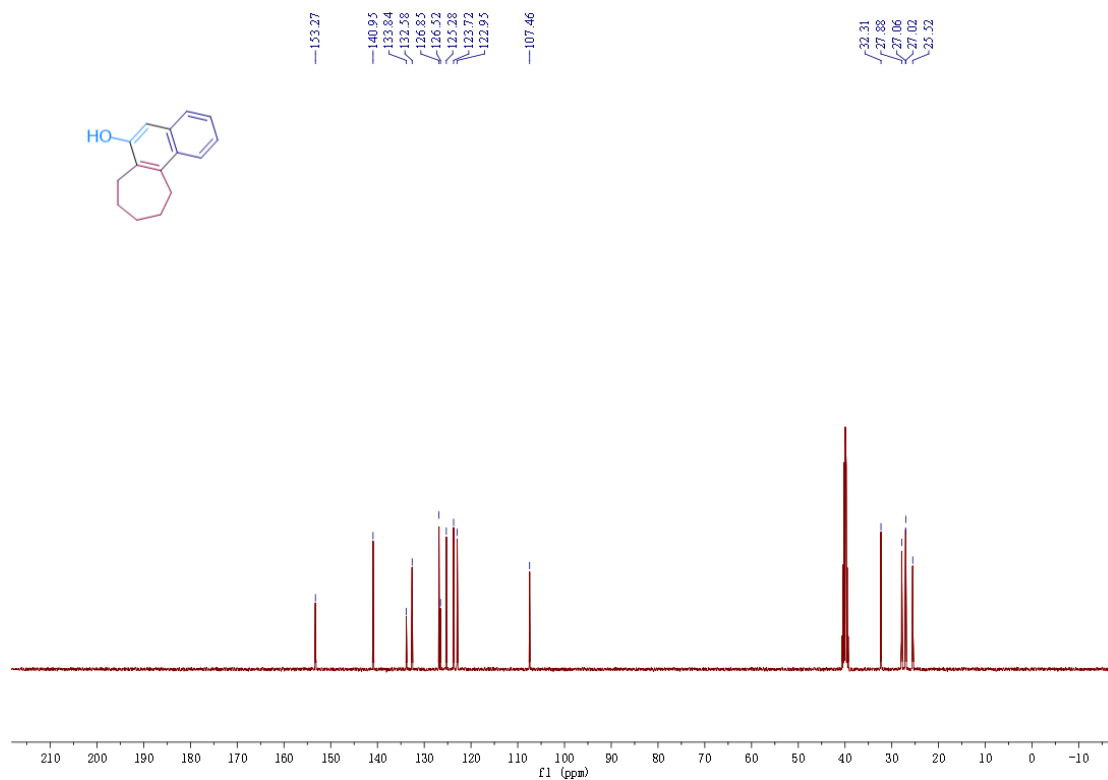

**<sup>1</sup>H NMR spectra of 7e (400 MHz, (CD<sub>3</sub>)<sub>2</sub>SO)**

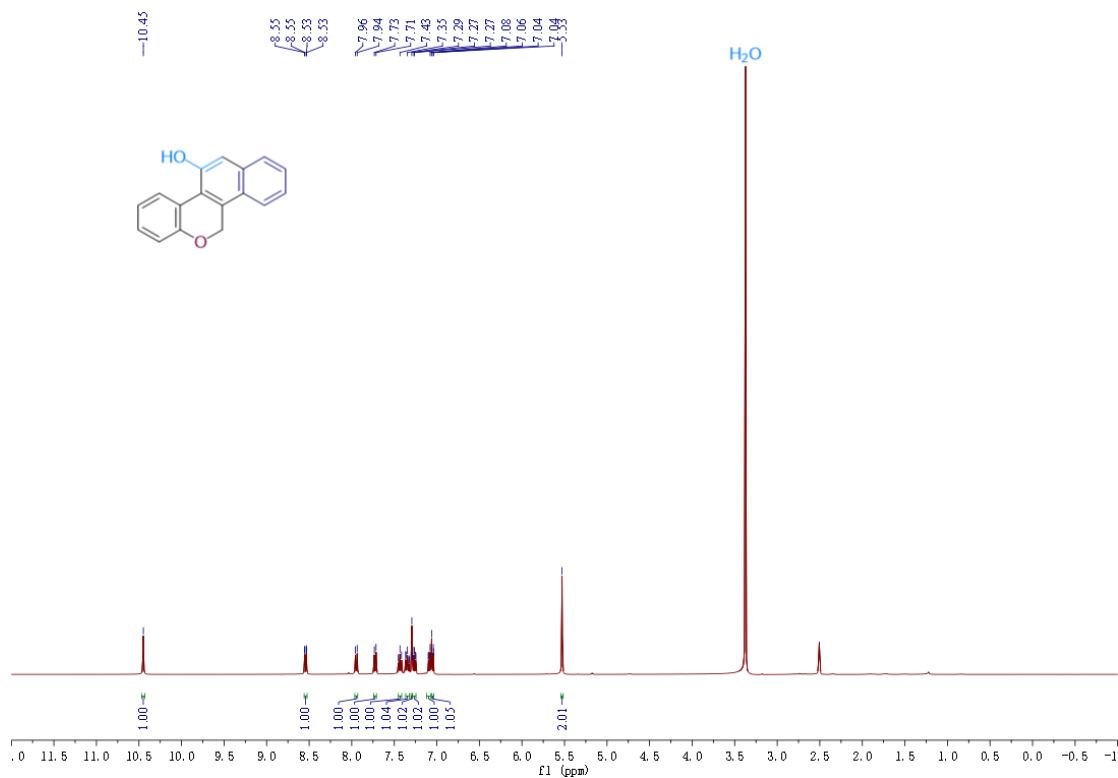

### <sup>13</sup>C NMR spectra of 7e (101 MHz, (CD<sub>3</sub>)<sub>2</sub>SO)

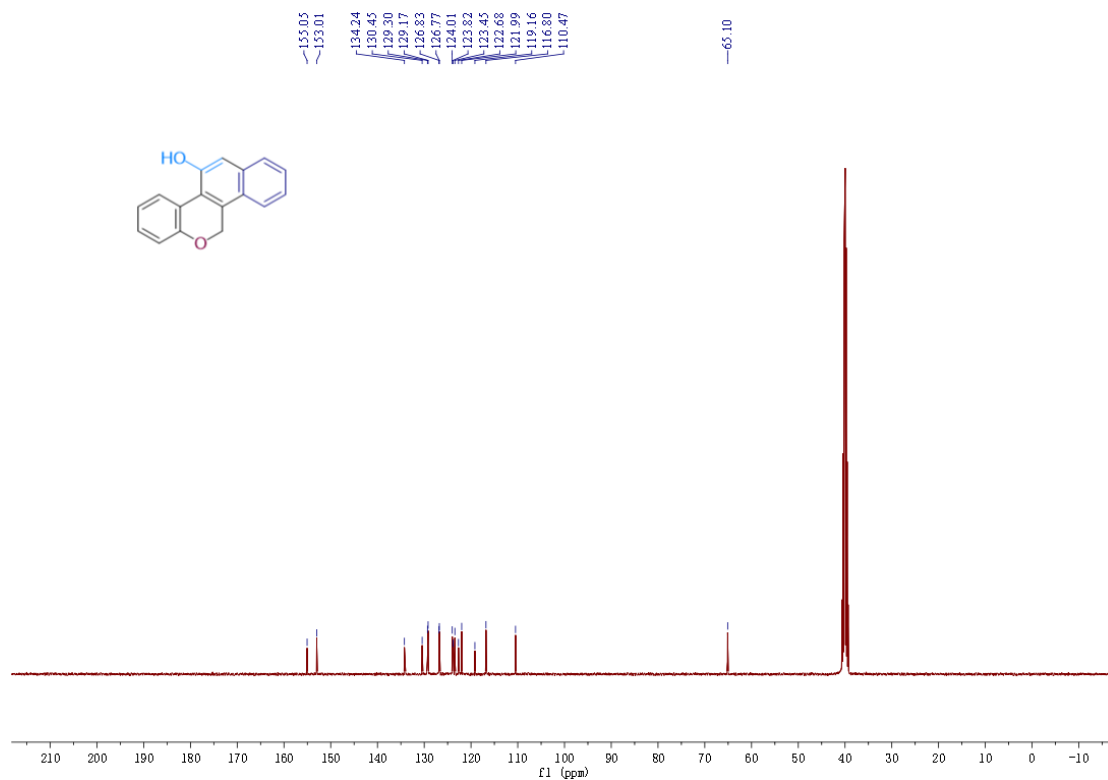

### <sup>1</sup>H NMR spectra of 7f (400 MHz, (CD<sub>3</sub>)<sub>2</sub>SO)

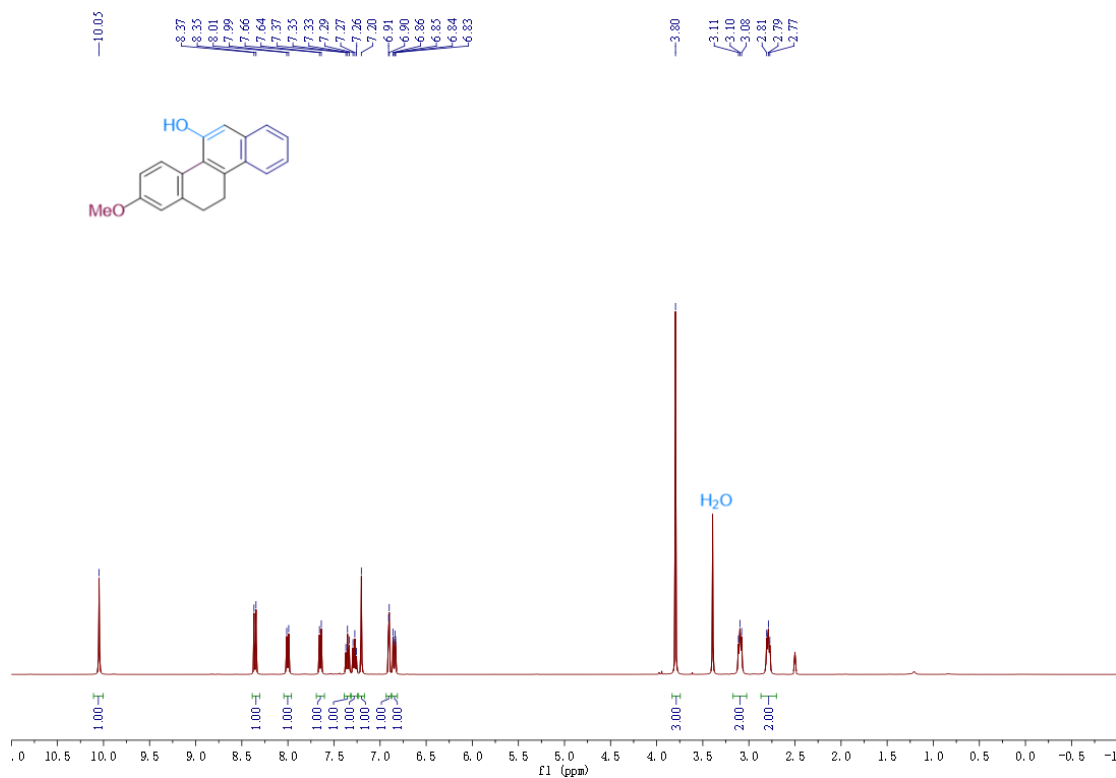



**<sup>13</sup>C NMR spectra of 7f (101 MHz, (CD<sub>3</sub>)<sub>2</sub>SO)**

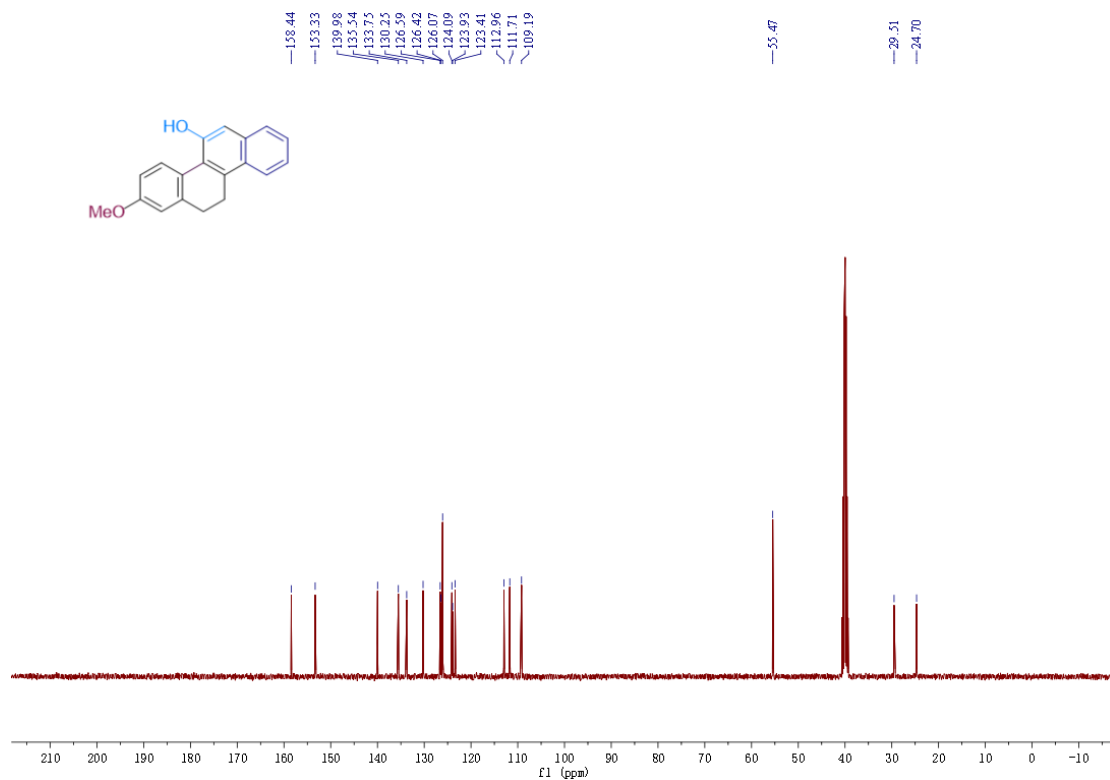

**<sup>1</sup>H NMR spectra of 7g (400 MHz, (CD<sub>3</sub>)<sub>2</sub>SO)**

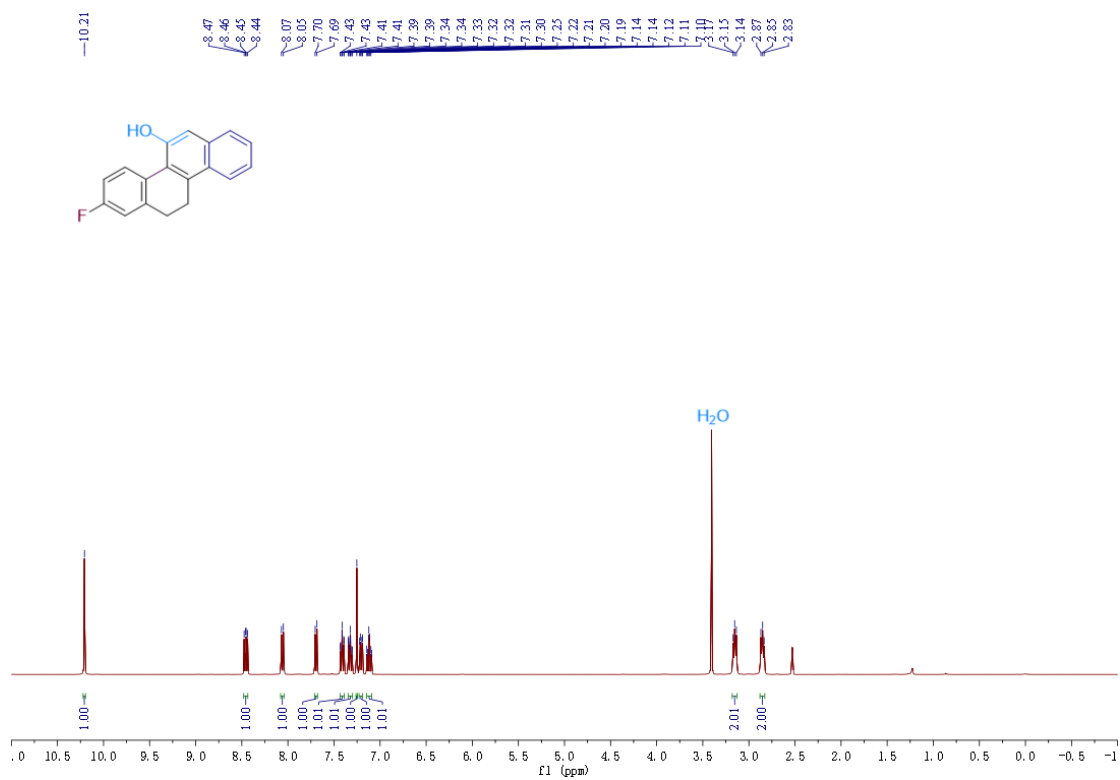

**<sup>13</sup>C NMR spectra of 7g (101 MHz, (CD<sub>3</sub>)<sub>2</sub>SO)**

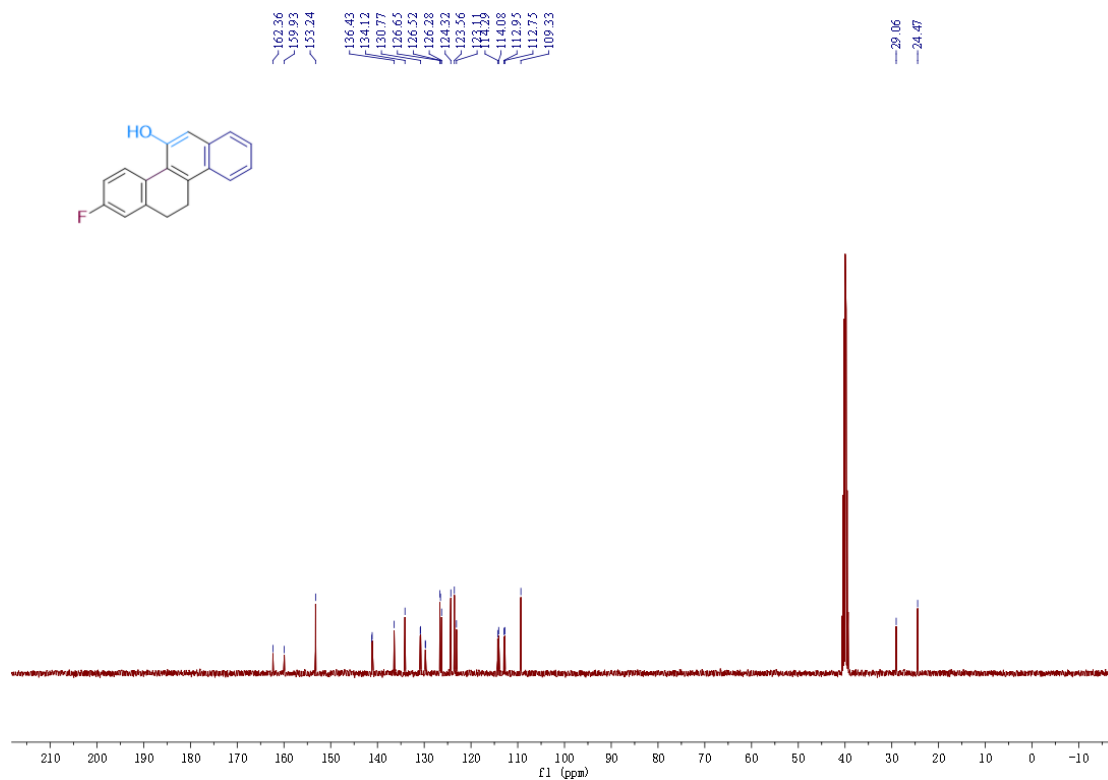

**<sup>19</sup>F NMR spectra of 7g (377 MHz, (CD<sub>3</sub>)<sub>2</sub>SO)**

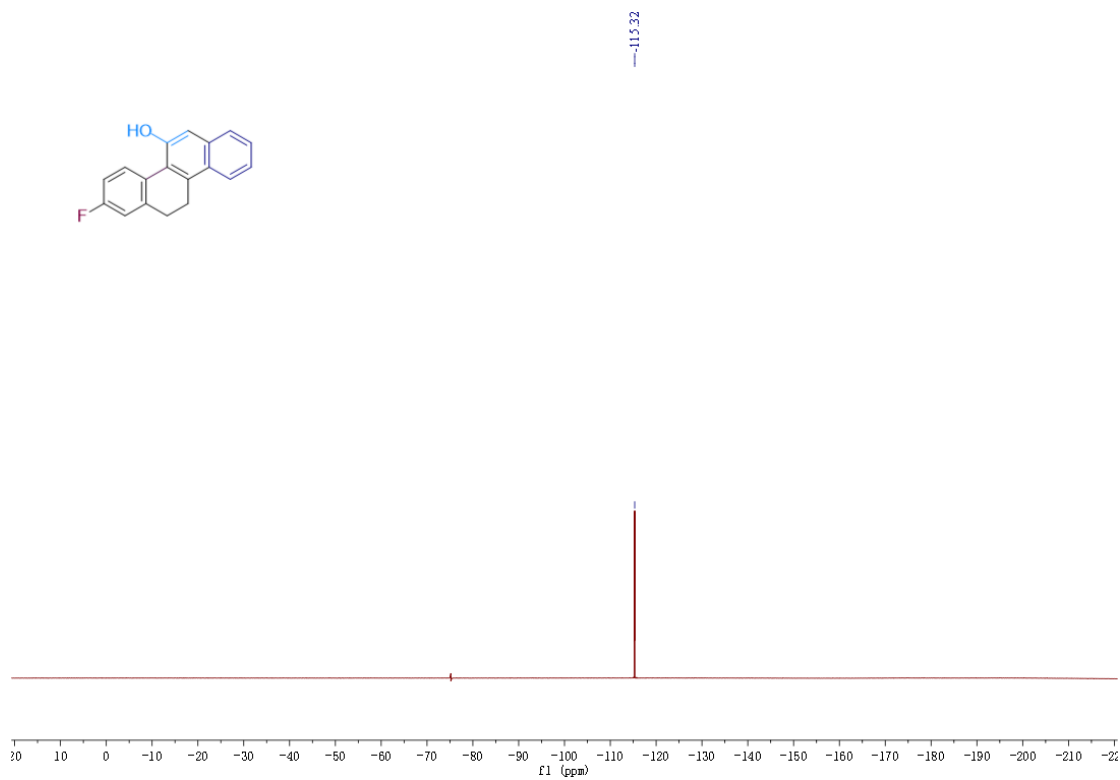

### <sup>1</sup>H NMR spectra of 7h (400 MHz, (CD<sub>3</sub>)<sub>2</sub>SO)

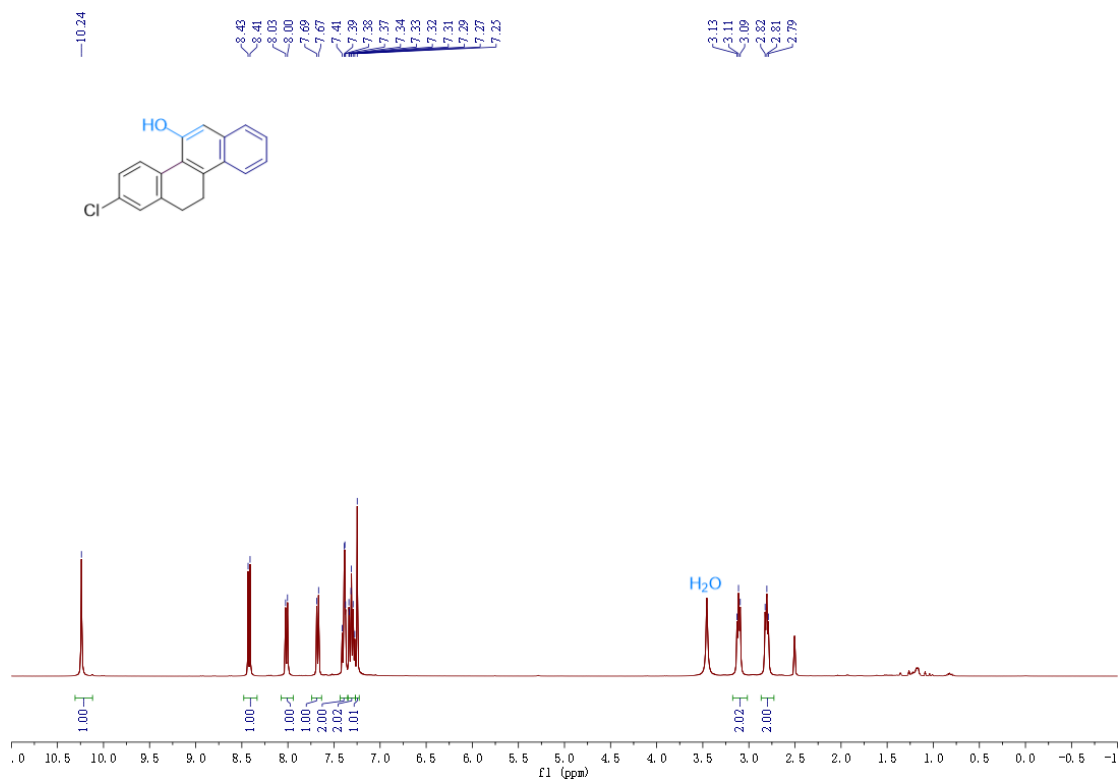

### <sup>13</sup>C NMR spectra of 7h (101 MHz, (CD<sub>3</sub>)<sub>2</sub>SO)

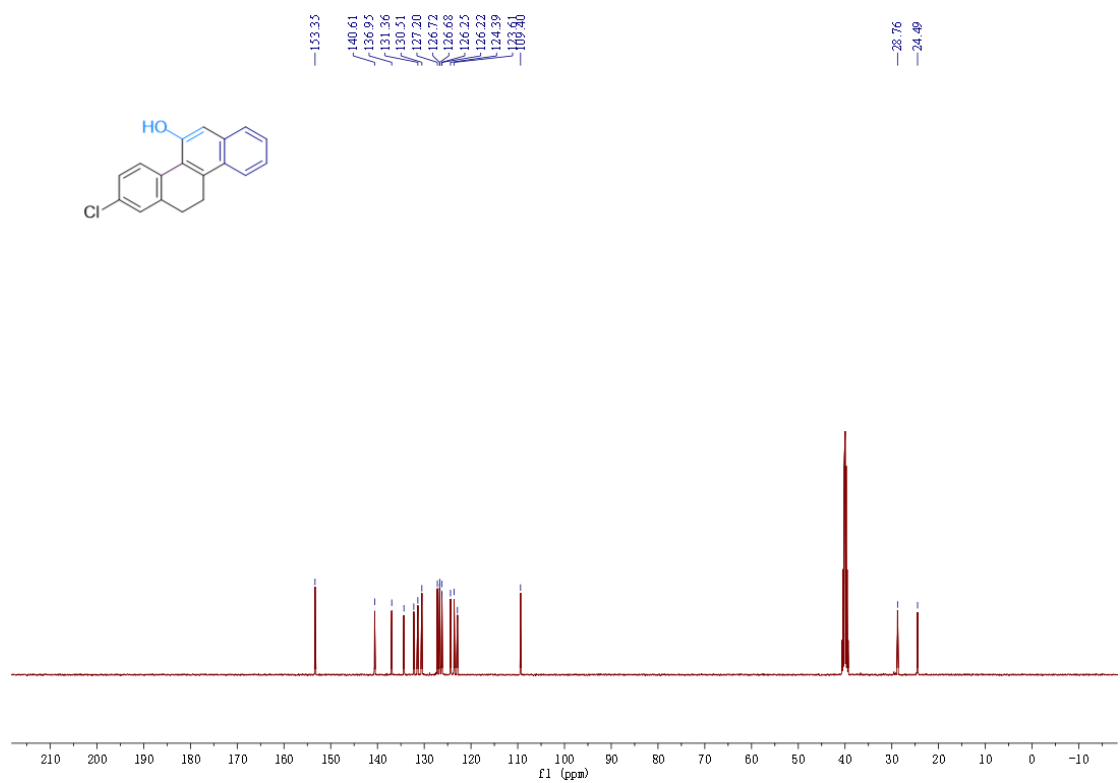

### <sup>1</sup>H NMR spectra of 7i (400 MHz, (CD<sub>3</sub>)<sub>2</sub>SO)

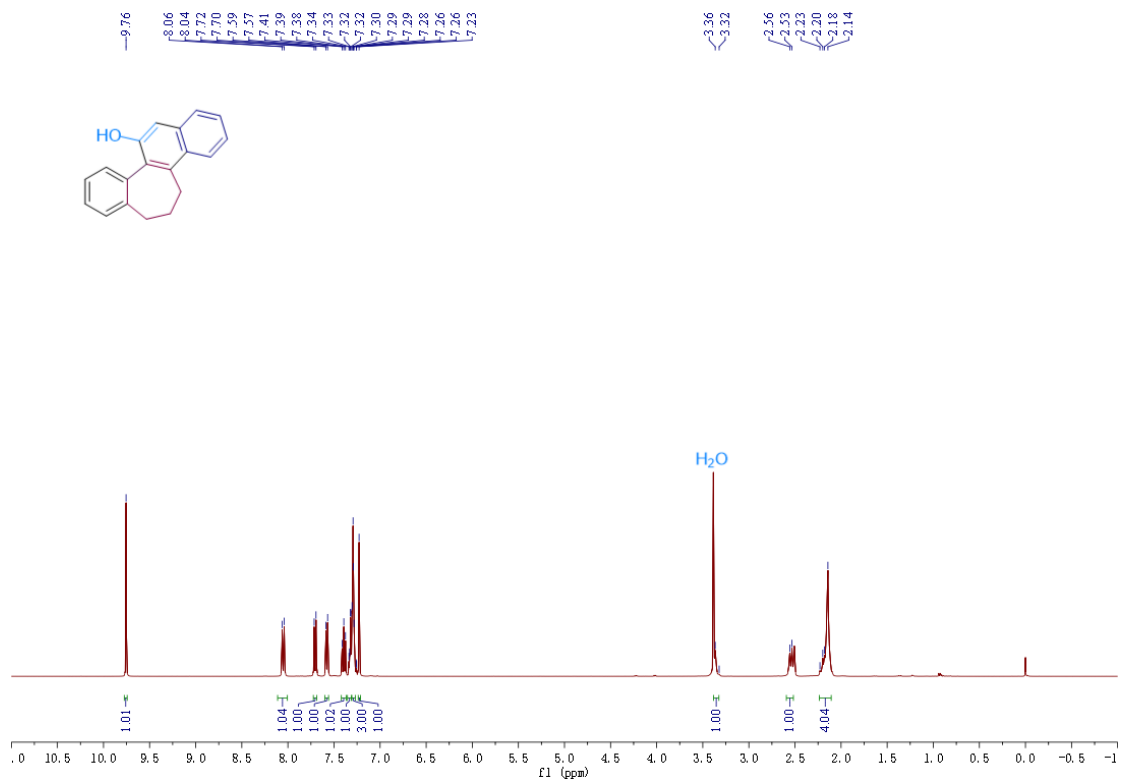

### <sup>13</sup>C NMR spectra of 7i (101 MHz, (CD<sub>3</sub>)<sub>2</sub>SO)

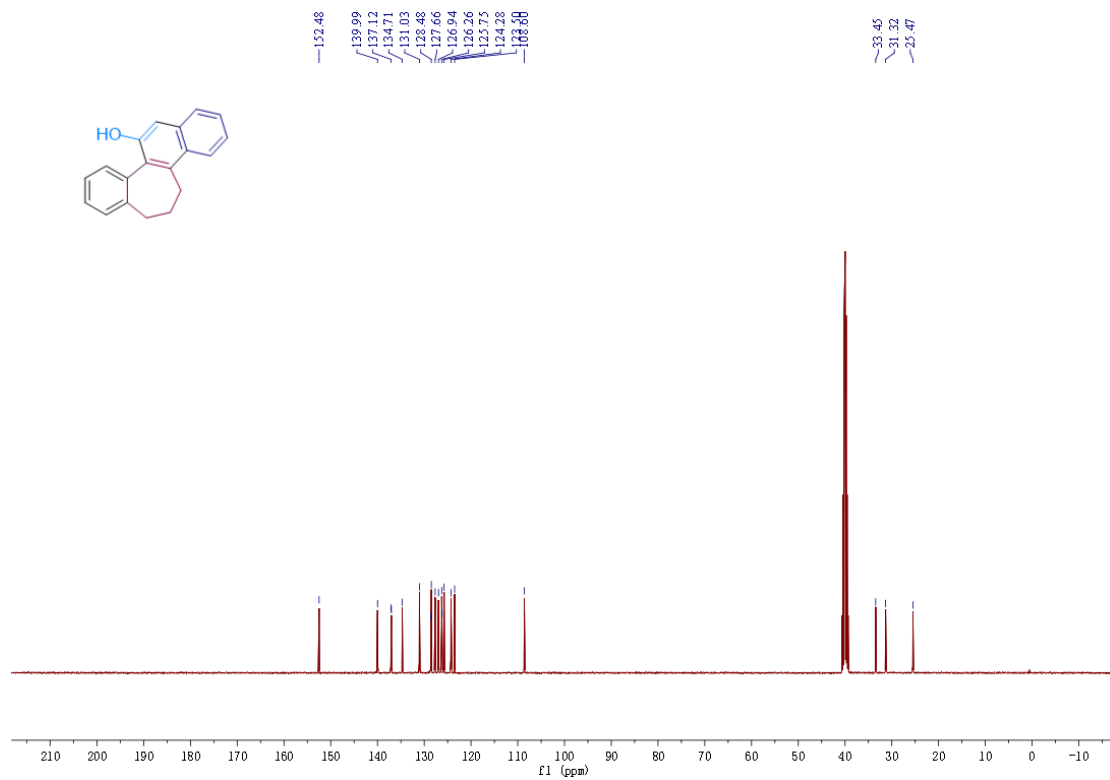

**<sup>1</sup>H NMR spectra of 9a (400 MHz, (CD<sub>3</sub>)<sub>2</sub>SO)**

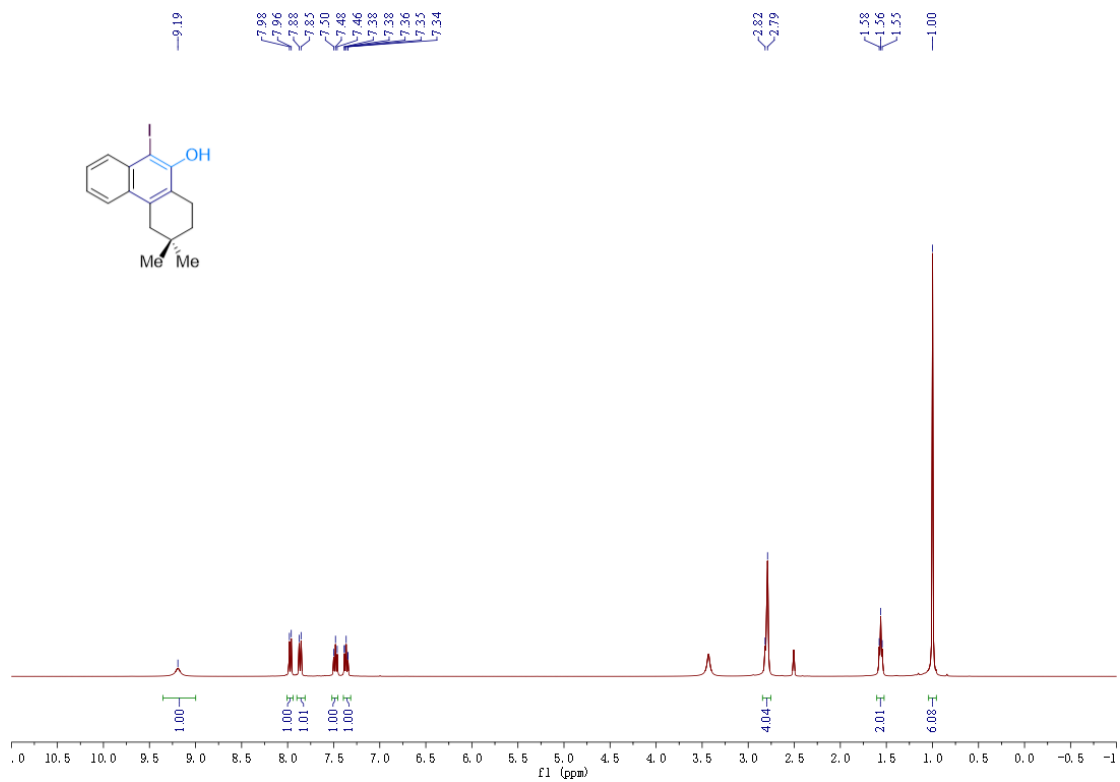

**<sup>13</sup>C NMR spectra of 9a (101 MHz, (CD<sub>3</sub>)<sub>2</sub>SO)**

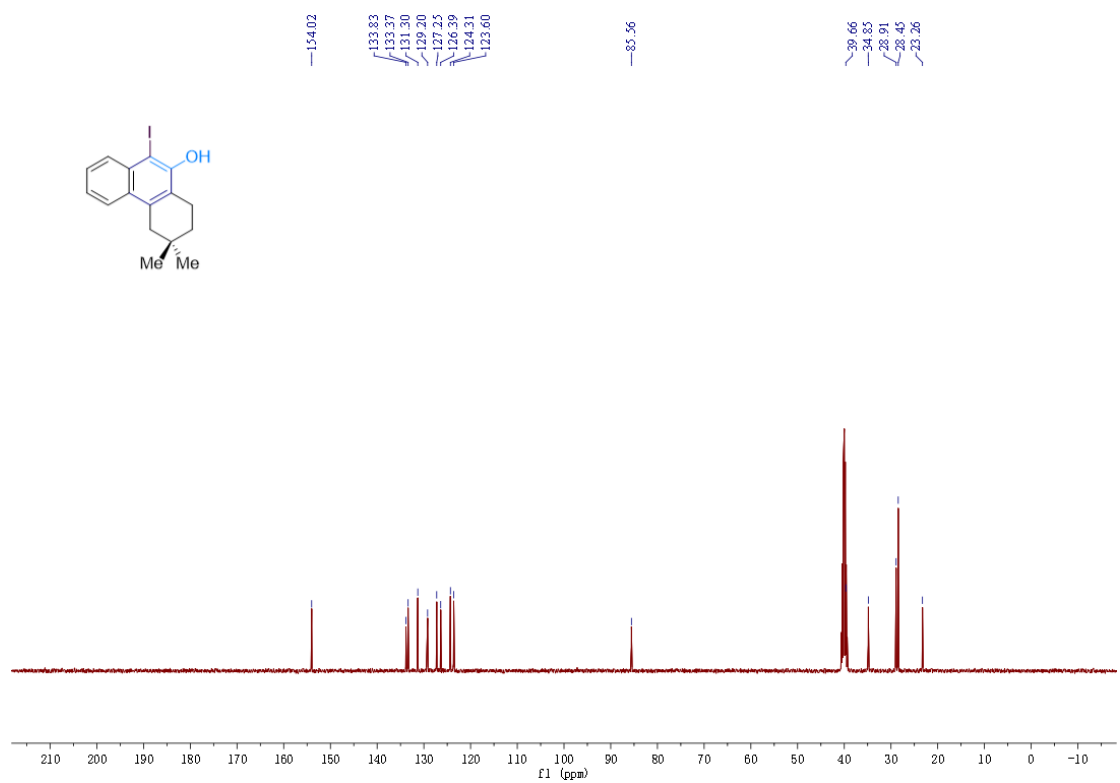

**<sup>1</sup>H NMR spectra of 9b (400 MHz, (CD<sub>3</sub>)<sub>2</sub>SO)**

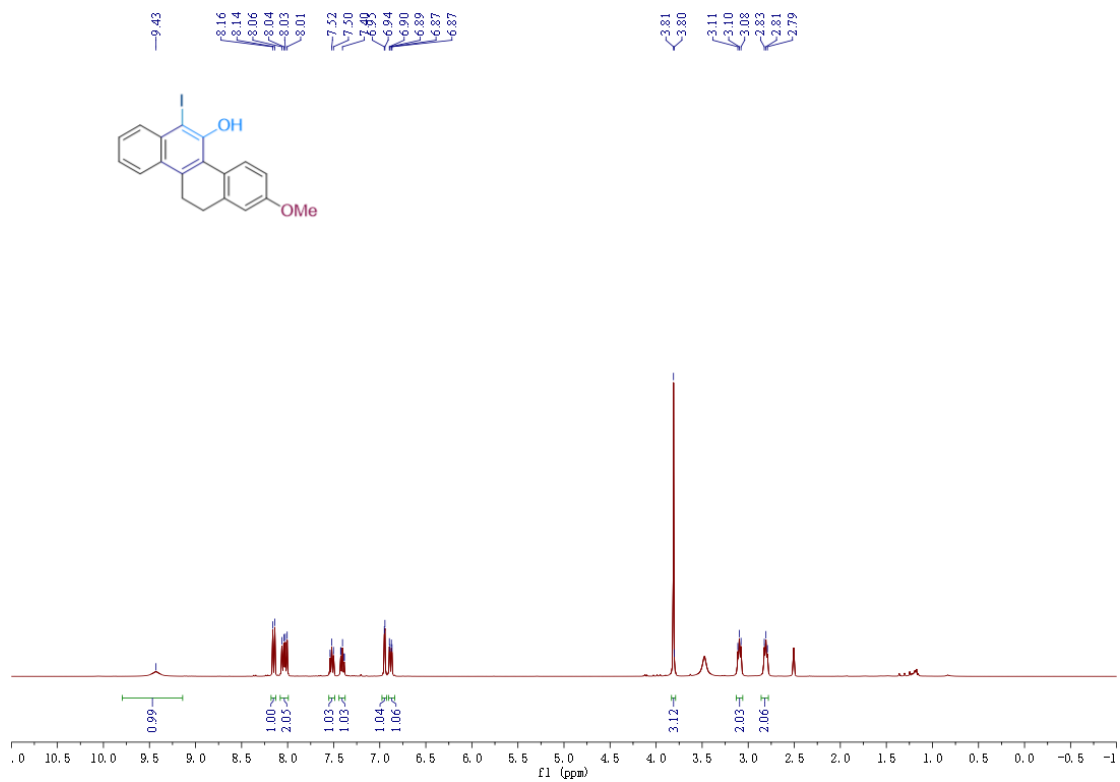

**<sup>13</sup>C NMR spectra of 9b (101 MHz, (CD<sub>3</sub>)<sub>2</sub>SO)**

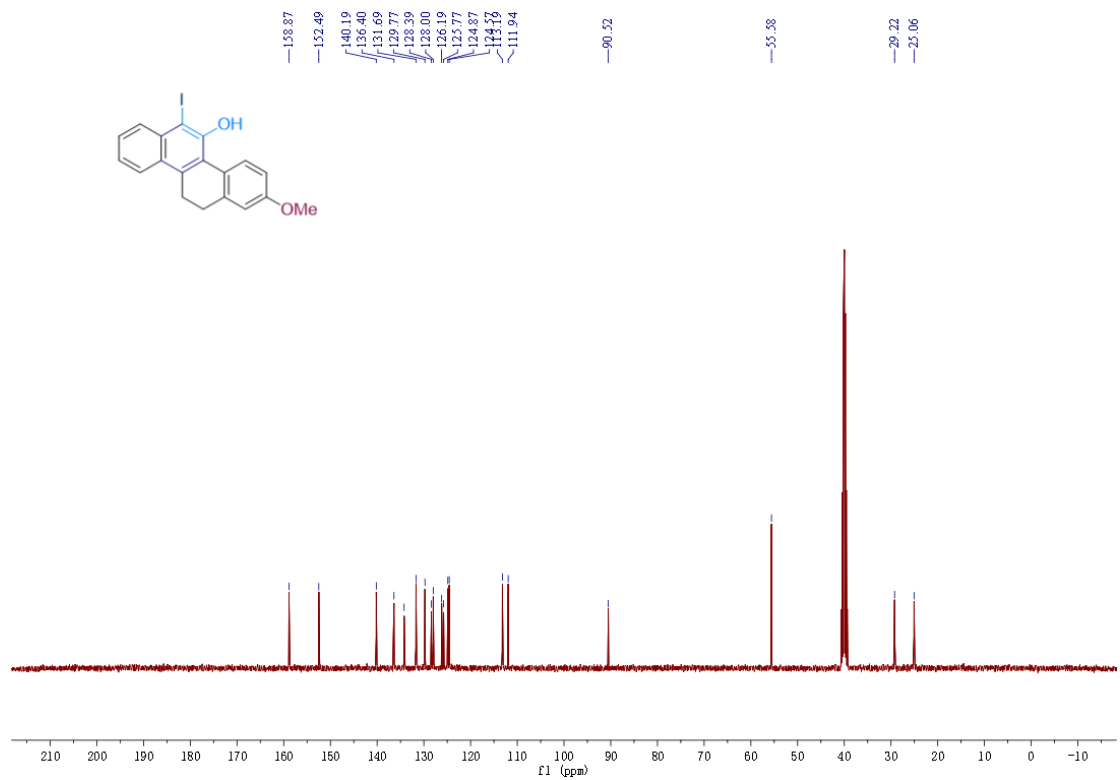

### <sup>1</sup>H NMR spectra of 9c (400 MHz, (CD<sub>3</sub>)<sub>2</sub>SO)

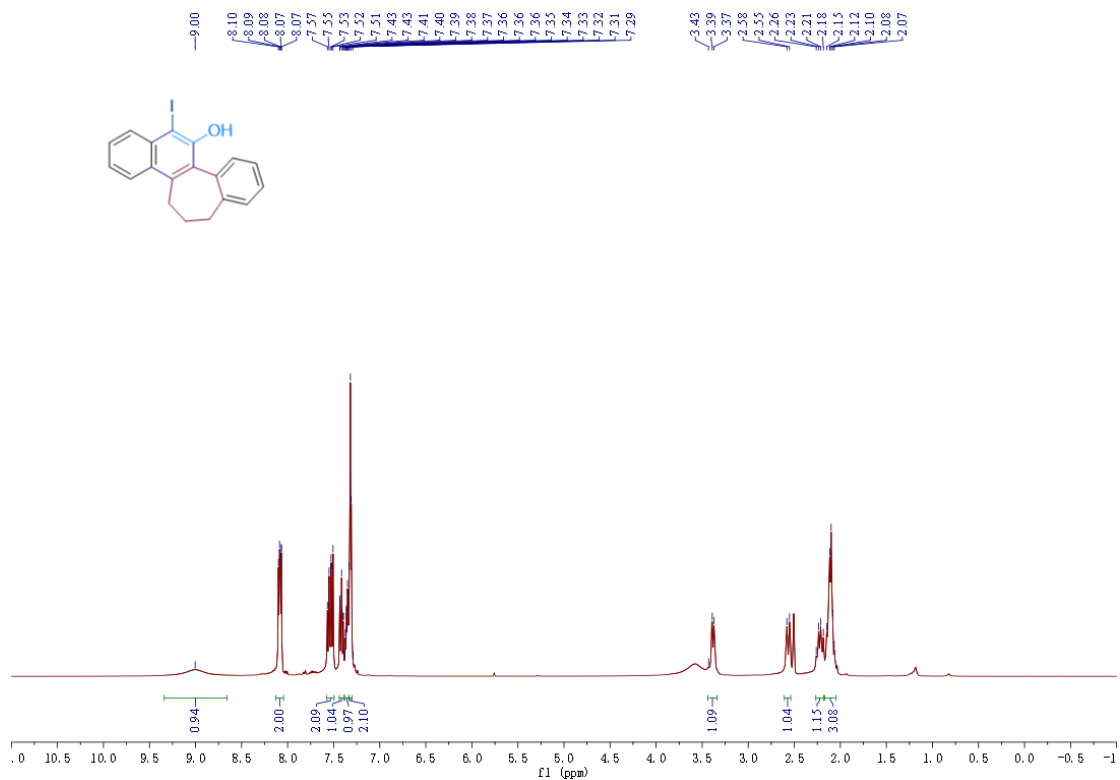

### <sup>13</sup>C NMR spectra of 9c (101 MHz, (CD<sub>3</sub>)<sub>2</sub>SO)

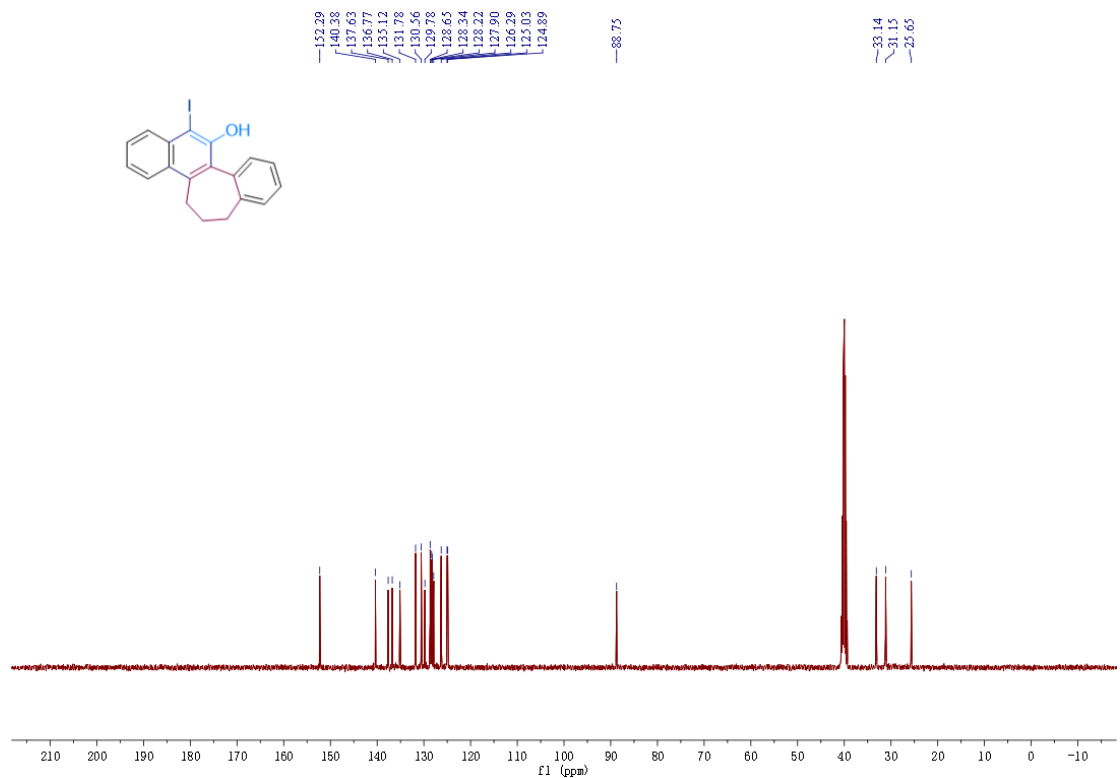

<sup>1</sup>H NMR spectra of 9d (400 MHz, (CD<sub>3</sub>)<sub>2</sub>SO)

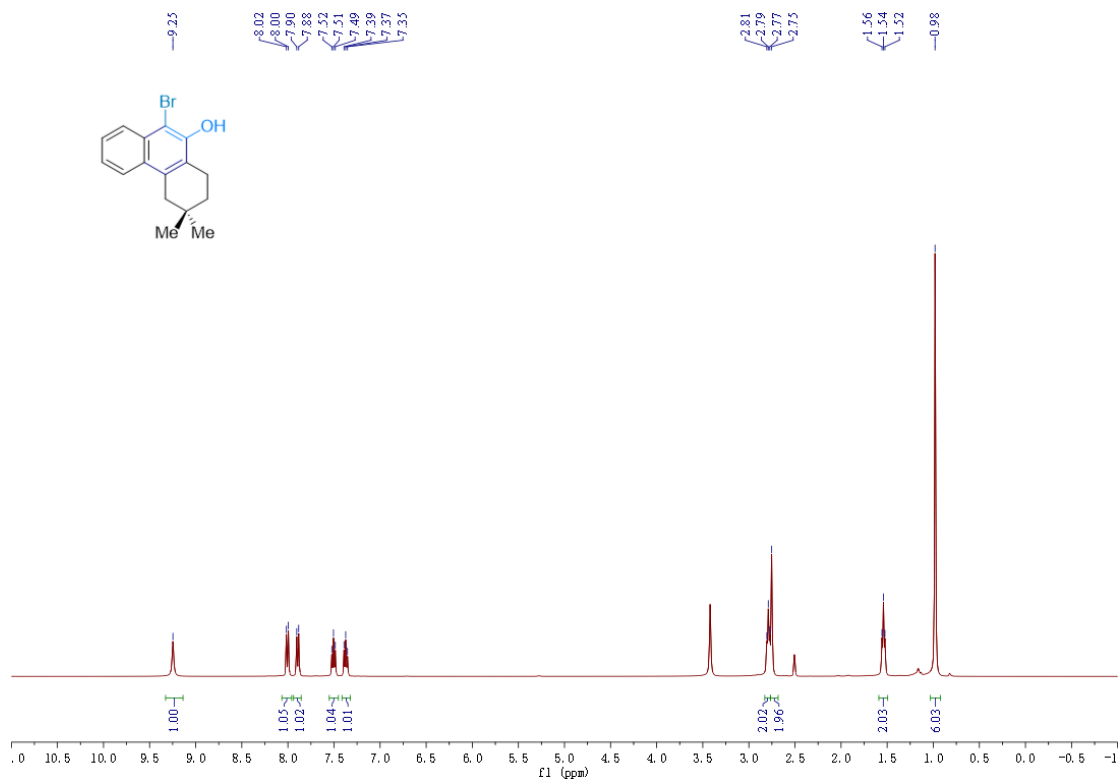

<sup>13</sup>C NMR spectra of 9d (101 MHz, (CD<sub>3</sub>)<sub>2</sub>SO)

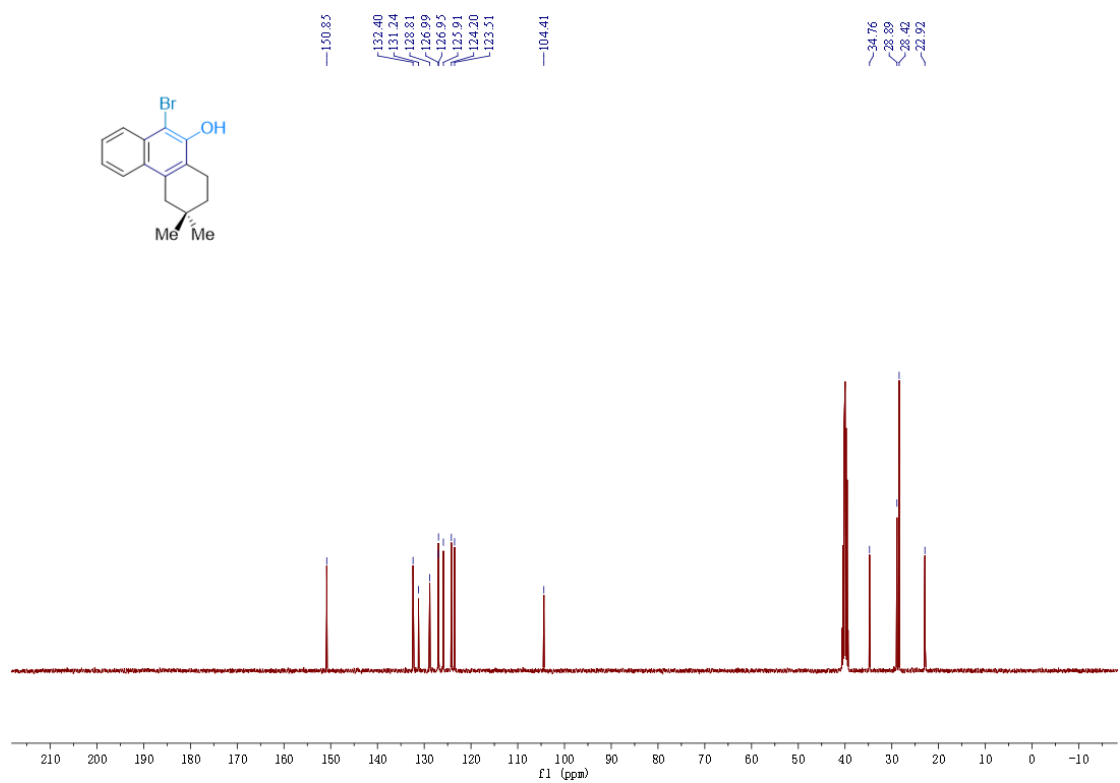



**<sup>1</sup>H NMR spectra of 9e (400 MHz, (CD<sub>3</sub>)<sub>2</sub>SO)**

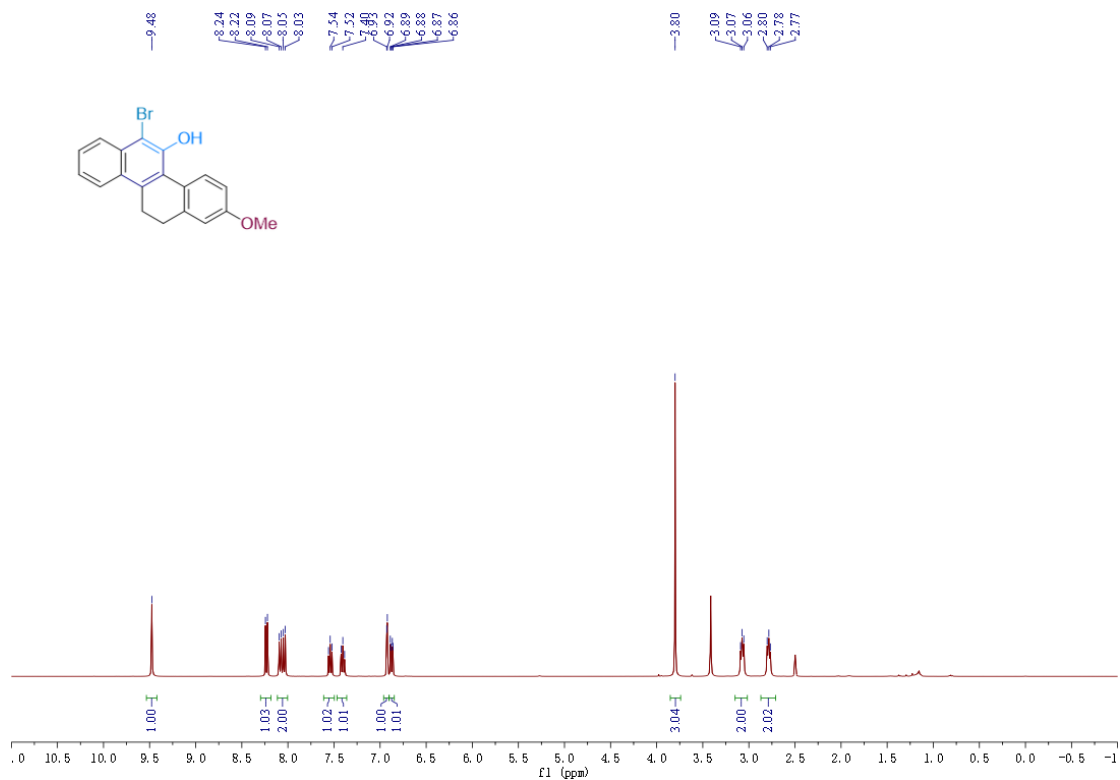

**<sup>13</sup>C NMR spectra of 9e (101 MHz, (CD<sub>3</sub>)<sub>2</sub>SO)**

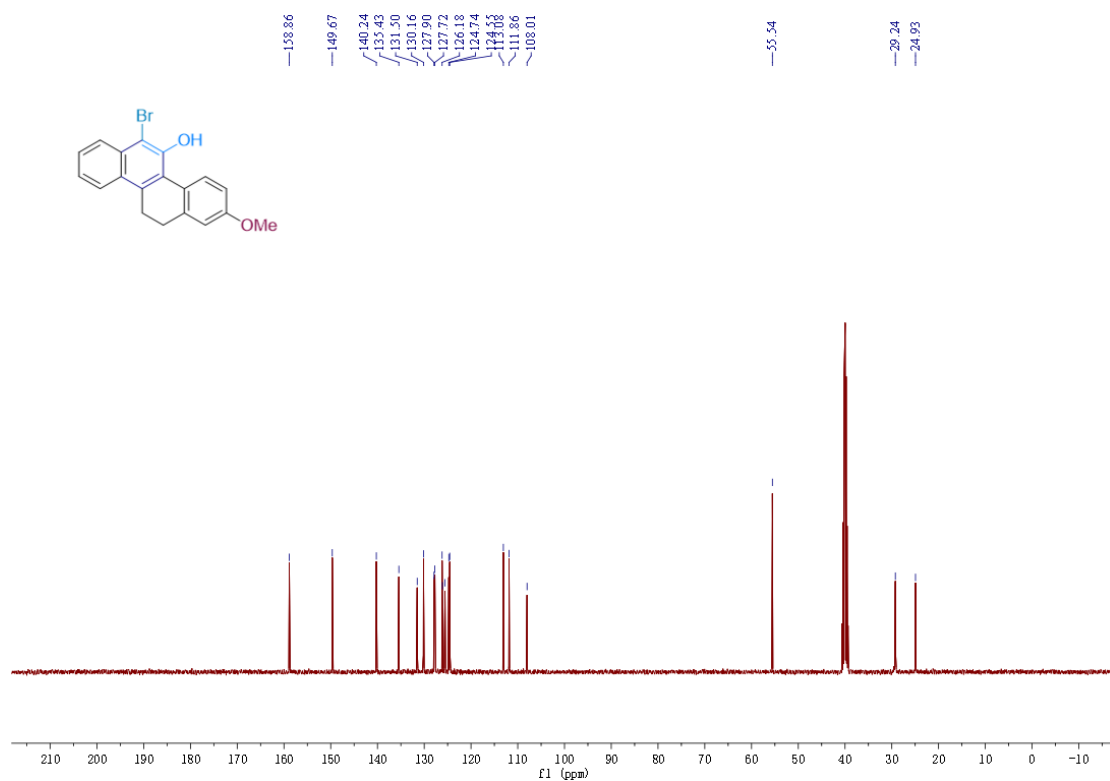

**<sup>1</sup>H NMR spectra of 9f (400 MHz, (CD<sub>3</sub>)<sub>2</sub>SO)**

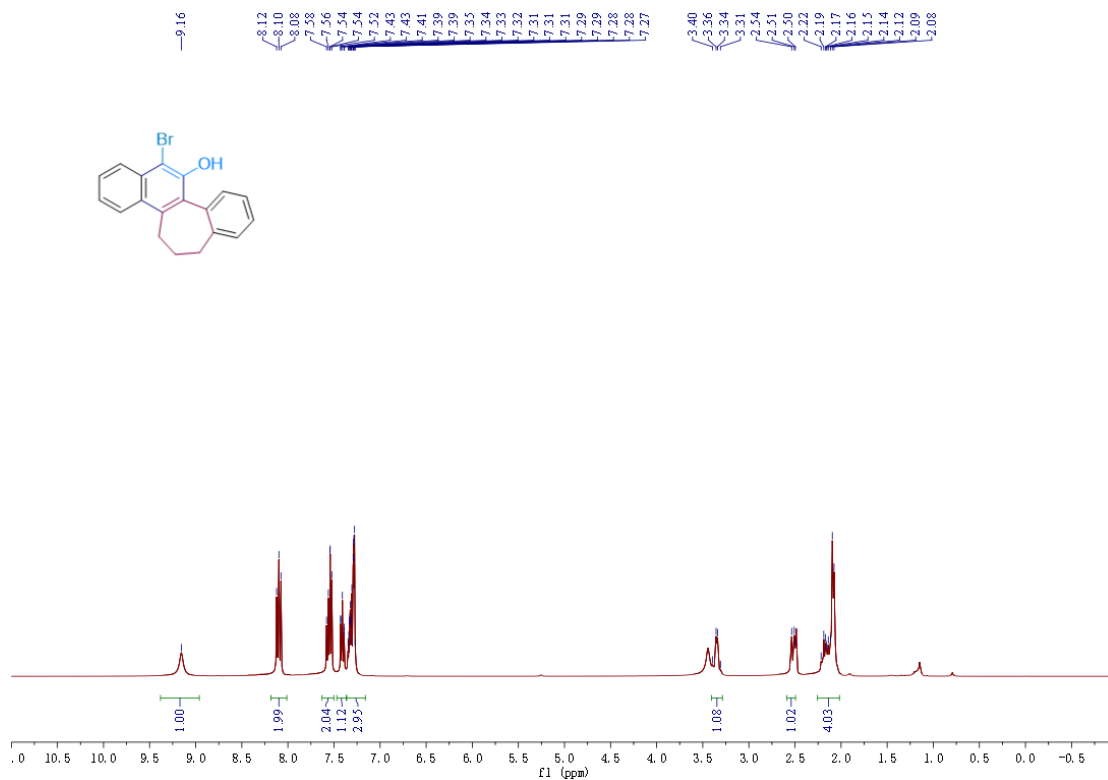

**<sup>13</sup>C NMR spectra of 9f (101 MHz, (CD<sub>3</sub>)<sub>2</sub>SO)**

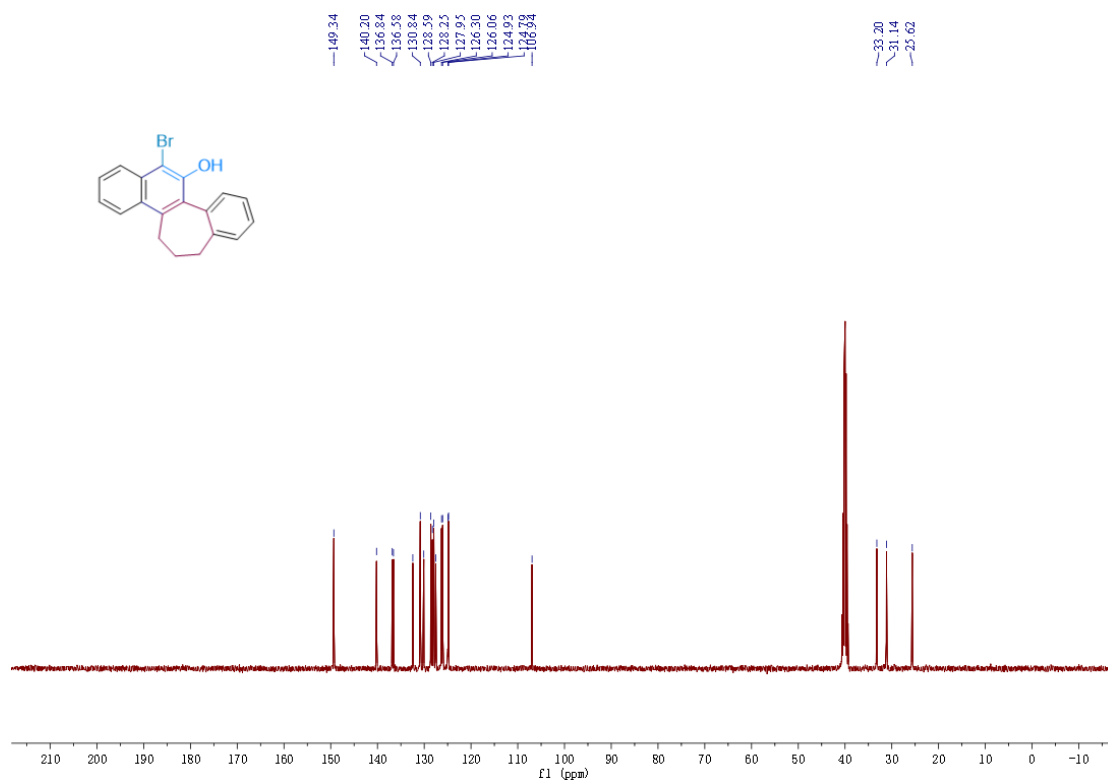

### <sup>1</sup>H NMR spectra of 11a (400 MHz, CDCl<sub>3</sub>)

DA-1

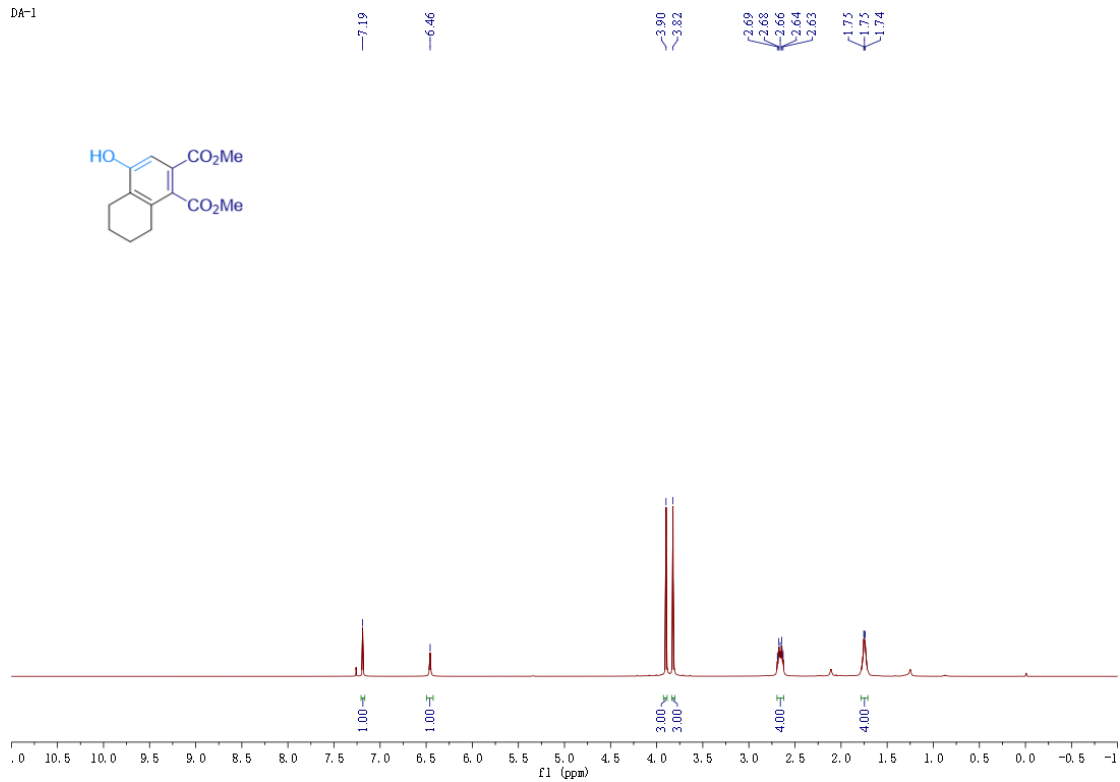

### <sup>13</sup>C NMR spectra of 11a (101 MHz, CDCl<sub>3</sub>)

TJB-DA-1

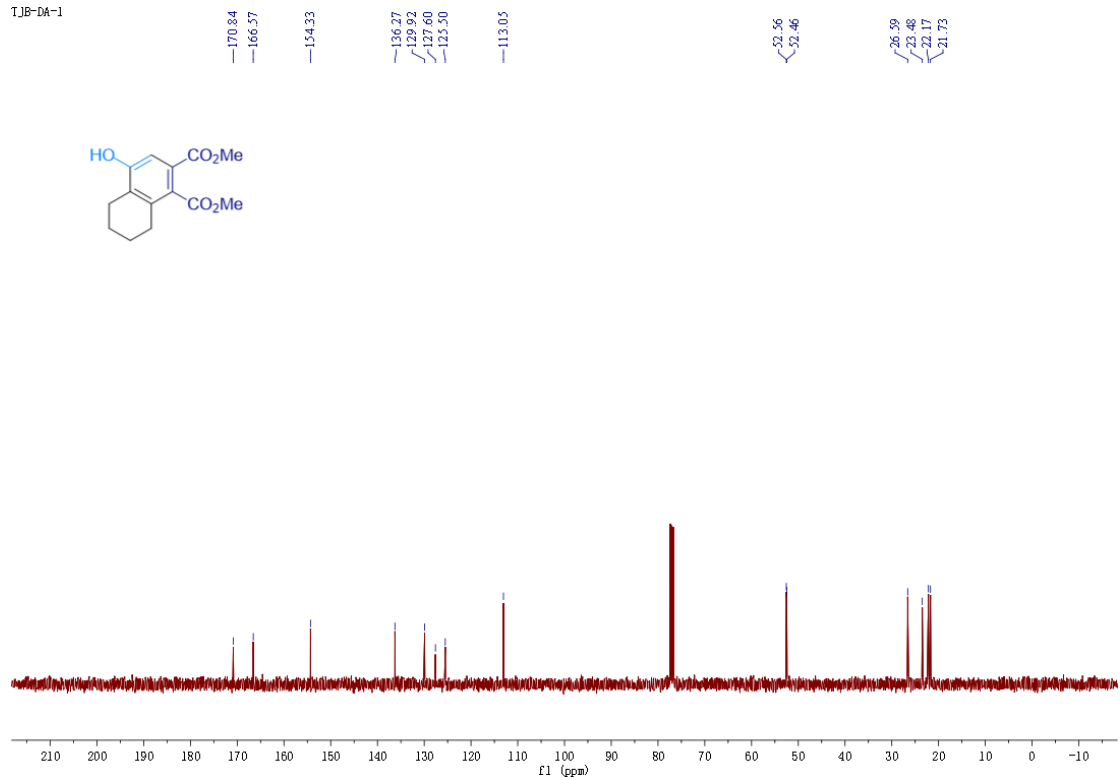

### <sup>1</sup>H NMR spectra of 11b (400 MHz, (CD<sub>3</sub>)<sub>2</sub>SO)

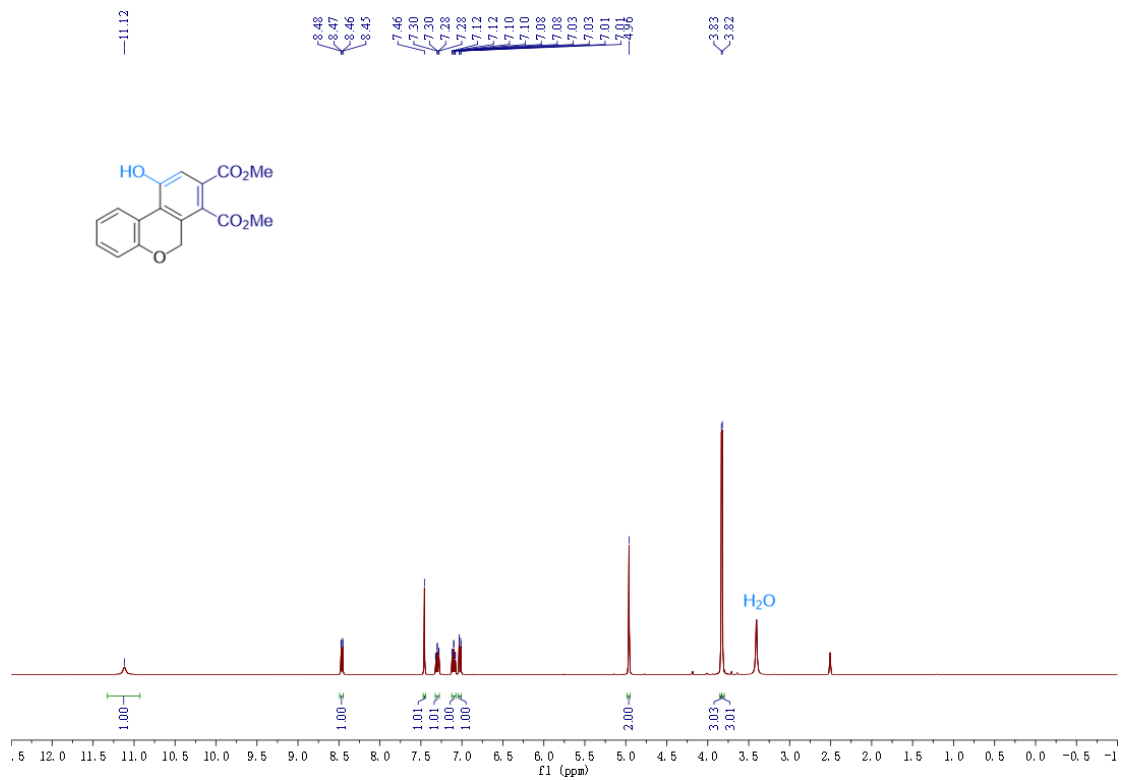

### <sup>13</sup>C NMR spectra of 11b (101 MHz, (CD<sub>3</sub>)<sub>2</sub>SO)

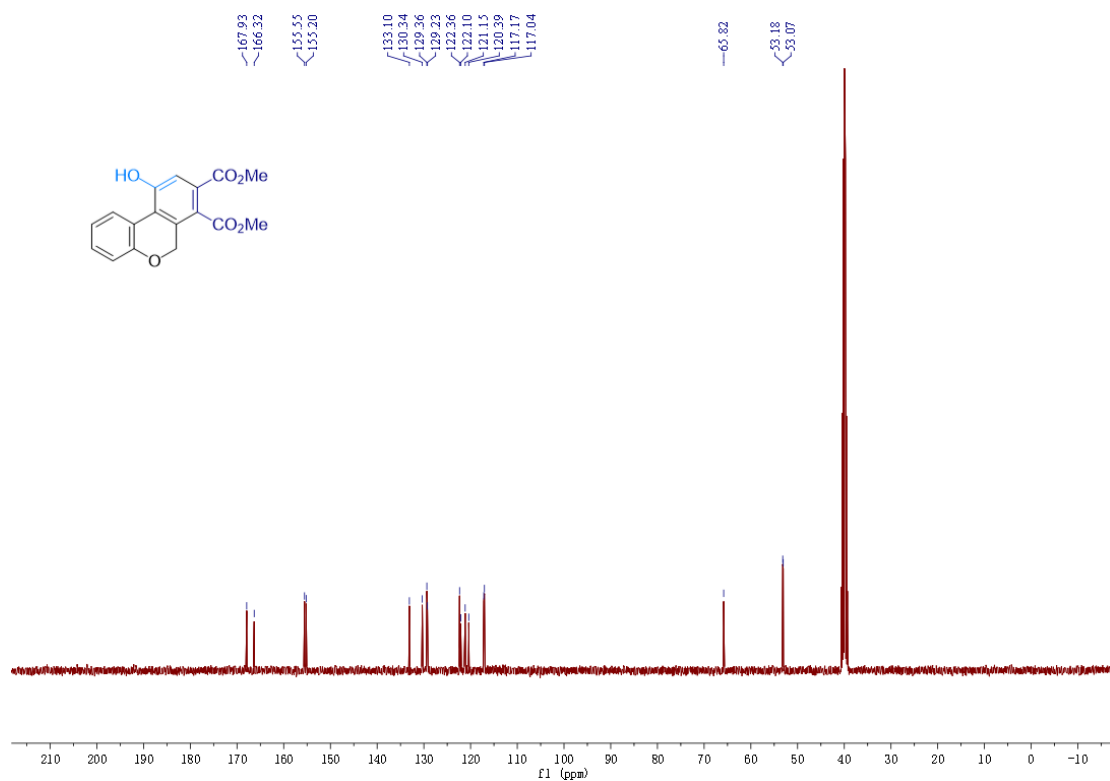

### <sup>1</sup>H NMR spectra of 11c (400 MHz, (CD<sub>3</sub>)<sub>2</sub>SO)

DA-COOME-F

-10.74

8.44  
8.43  
8.42  
8.41  
7.46  
7.18  
7.17  
7.15  
7.15  
7.12  
7.12  
7.10  
7.10  
3.83  
2.76  
2.74  
2.73  
2.72  
2.66  
2.65  
2.64  
2.63

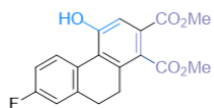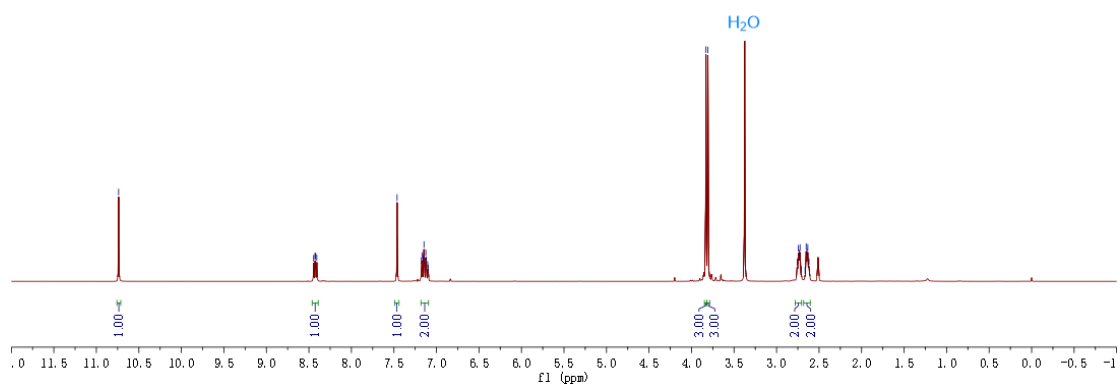

### <sup>13</sup>C NMR spectra of 11c (101 MHz, (CD<sub>3</sub>)<sub>2</sub>SO)

DA-COOME-F

-10.74

169.25  
166.01  
162.83  
160.39  
155.28  
141.73  
141.65  
137.75  
131.30  
131.21  
128.02  
127.35  
125.39  
116.81  
114.60  
114.39  
113.33  
113.12  
53.02  
52.77  
28.63  
26.48

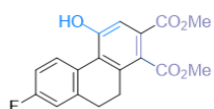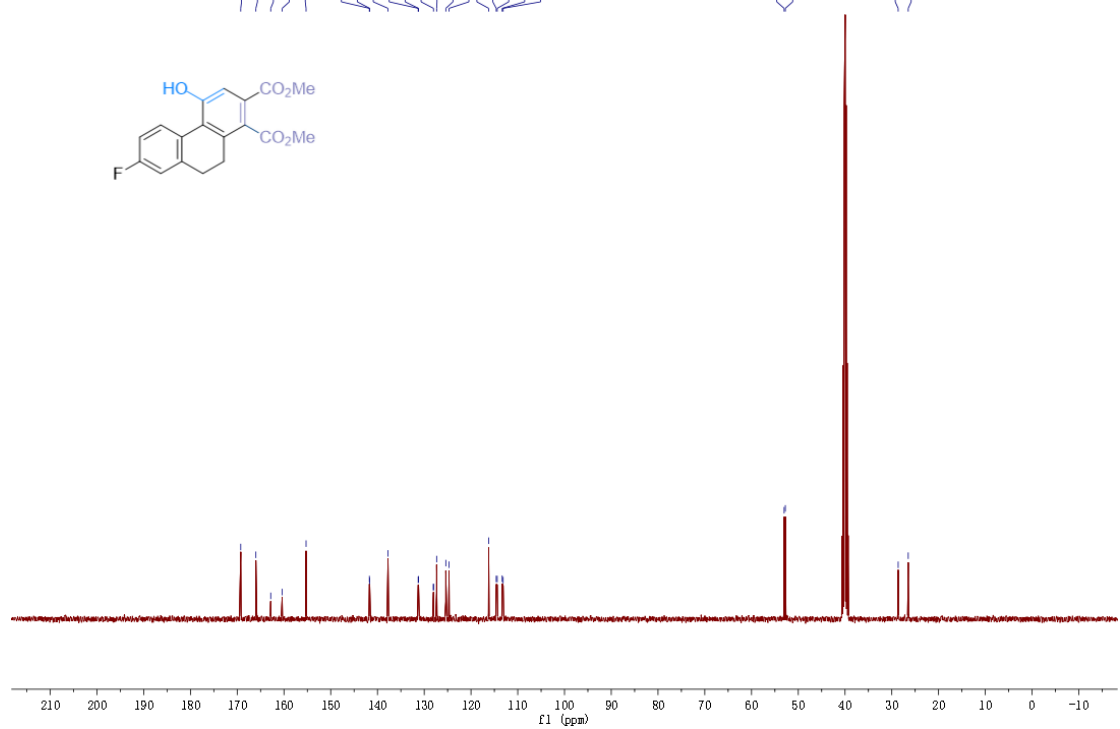

### $^{19}\text{F}$ NMR spectra of 11c (377 MHz, $(\text{CD}_3)_2\text{SO}$ )

DA-COME-F

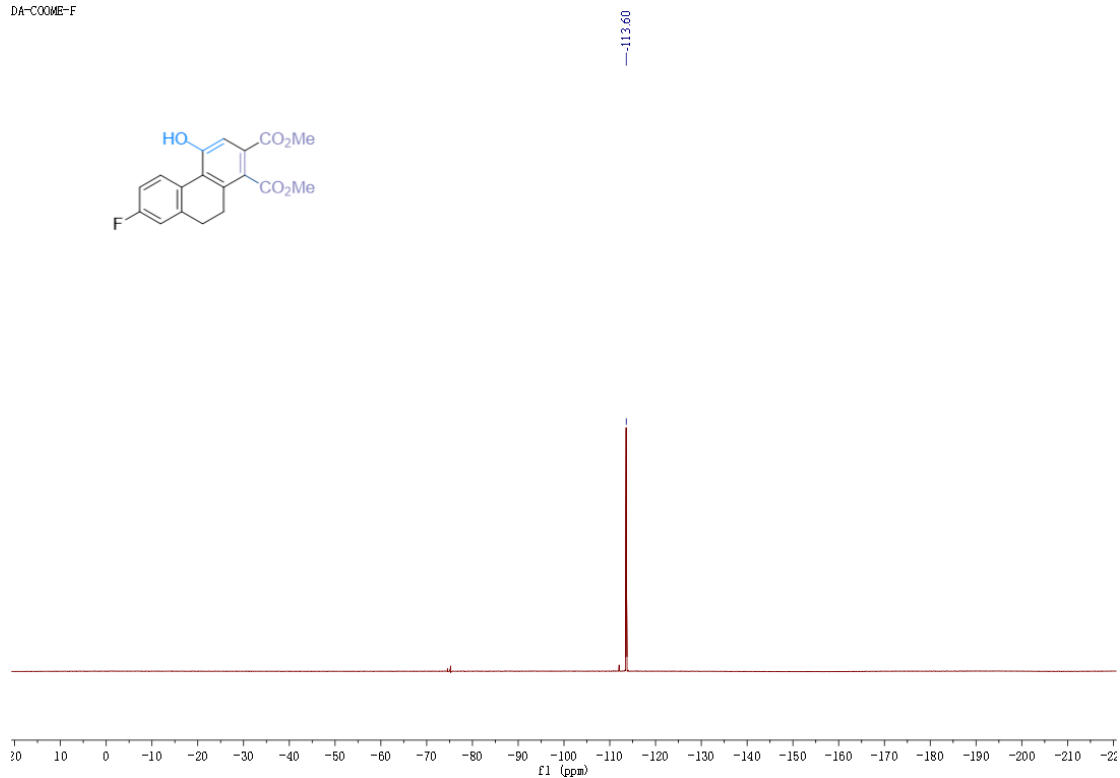

### $^1\text{H}$ NMR spectra of 11d (400 MHz, $(\text{CD}_3)_2\text{SO}$ )

DA-CF3-4

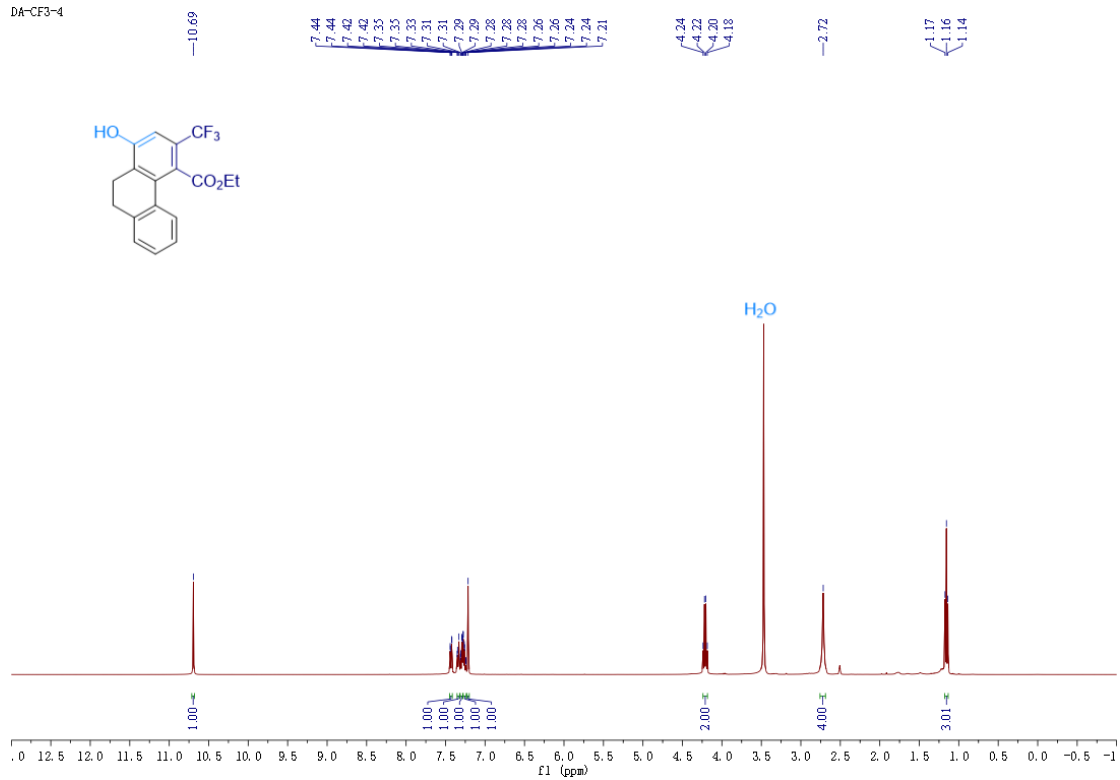

### <sup>13</sup>C NMR spectra of 11d (101 MHz, (CD<sub>3</sub>)<sub>2</sub>SO)

DA-CF3-4

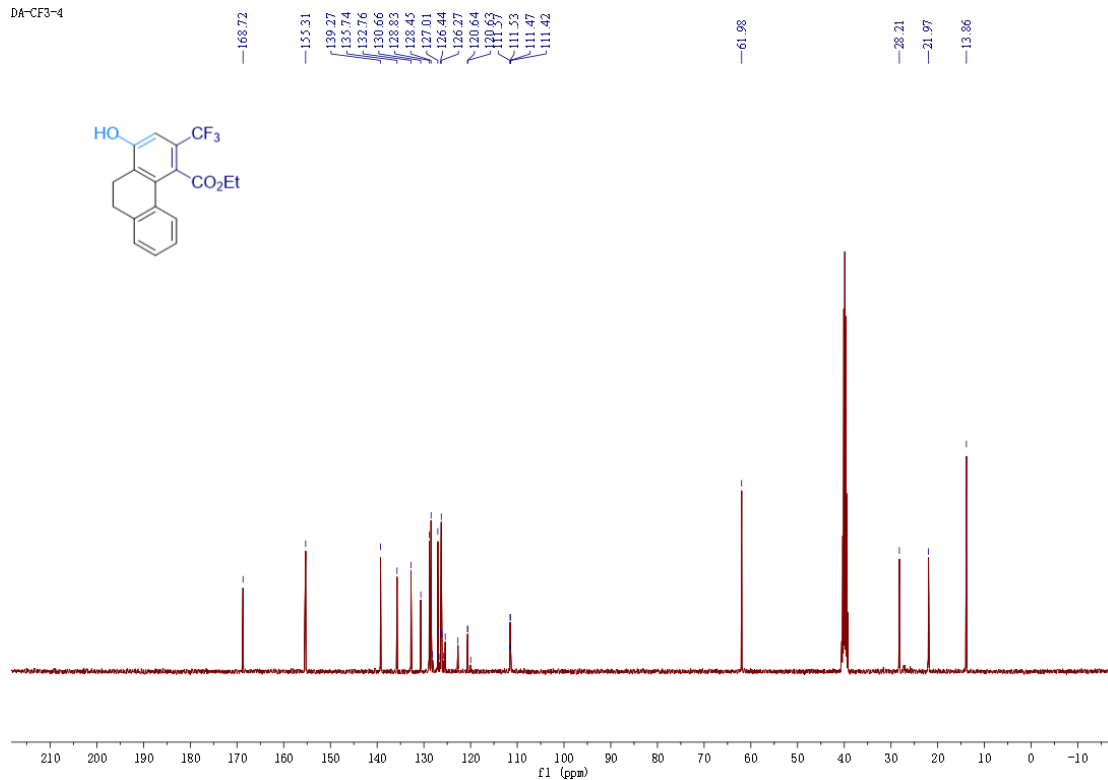

### <sup>19</sup>F NMR spectra of 11d (377 MHz, (CD<sub>3</sub>)<sub>2</sub>SO)

DA-CF3-4

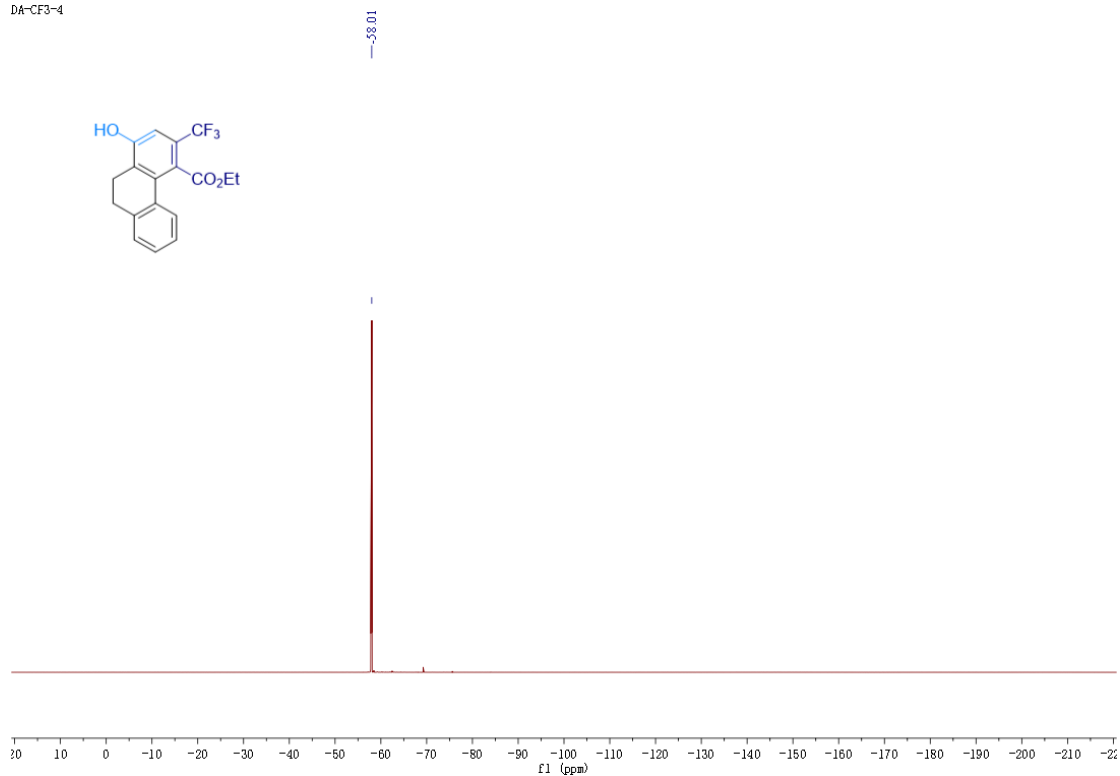

**<sup>1</sup>H NMR spectra of 11e (400 MHz, CDCl<sub>3</sub>)**

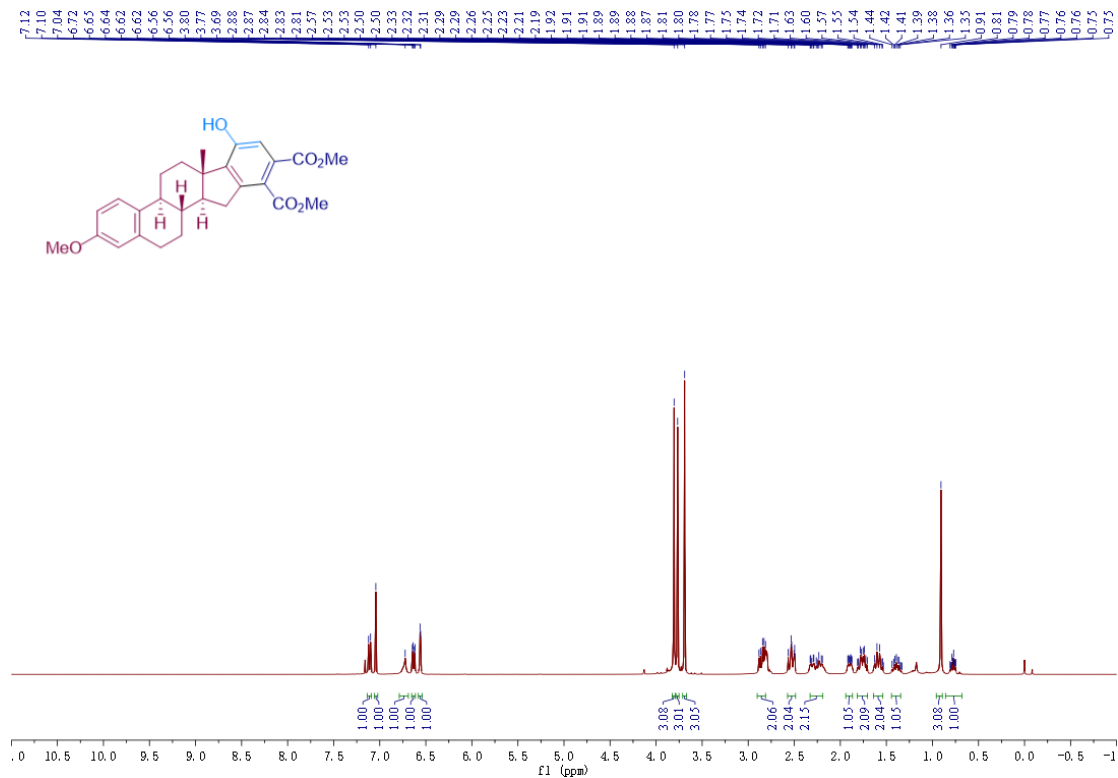

**<sup>13</sup>C NMR spectra of 11e (101 MHz, CDCl<sub>3</sub>)**

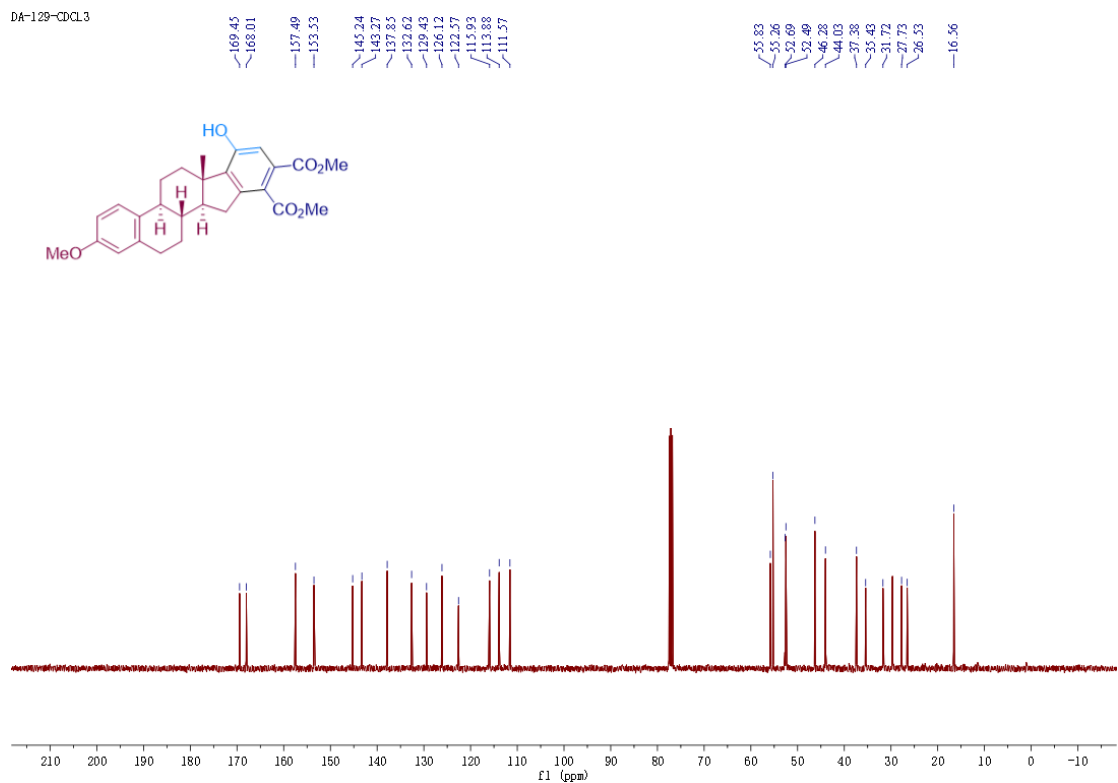



### <sup>1</sup>H NMR spectra of 11f (400 MHz, CDCl<sub>3</sub>)

DA-127-CDCl<sub>3</sub>

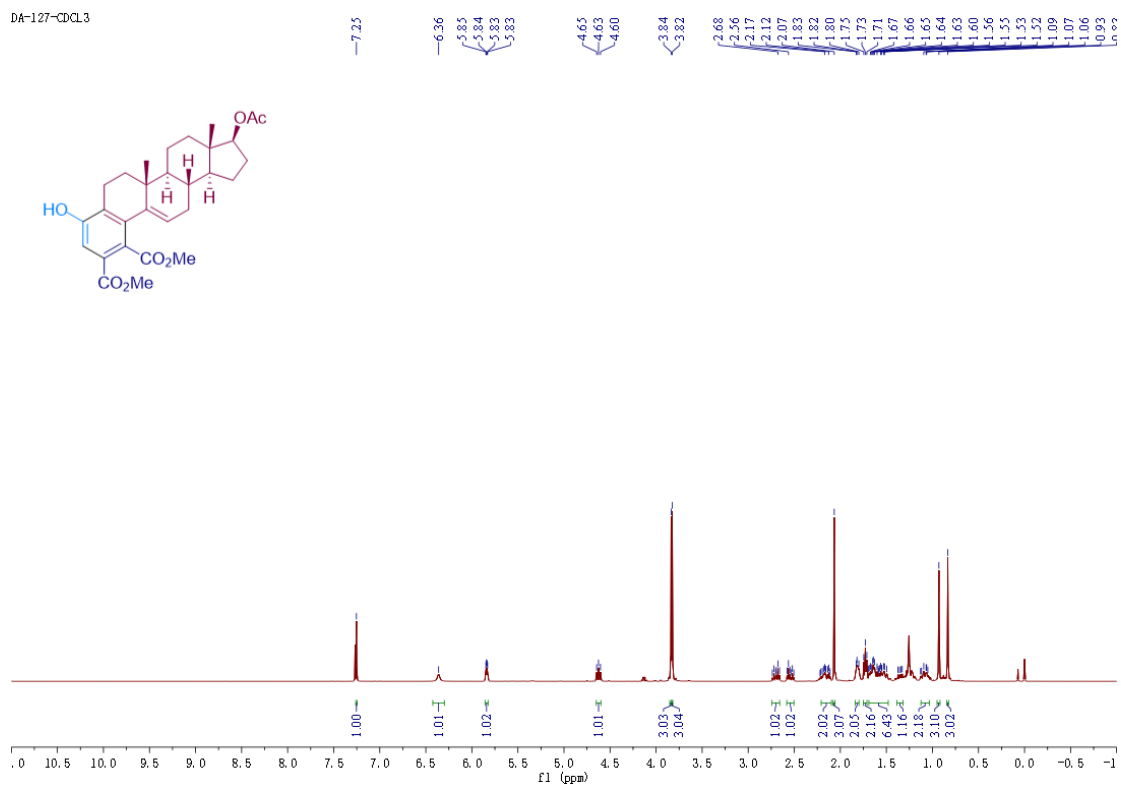

### <sup>13</sup>C NMR spectra of 11f (101 MHz, CDCl<sub>3</sub>)

DA-127-CDCl<sub>3</sub>

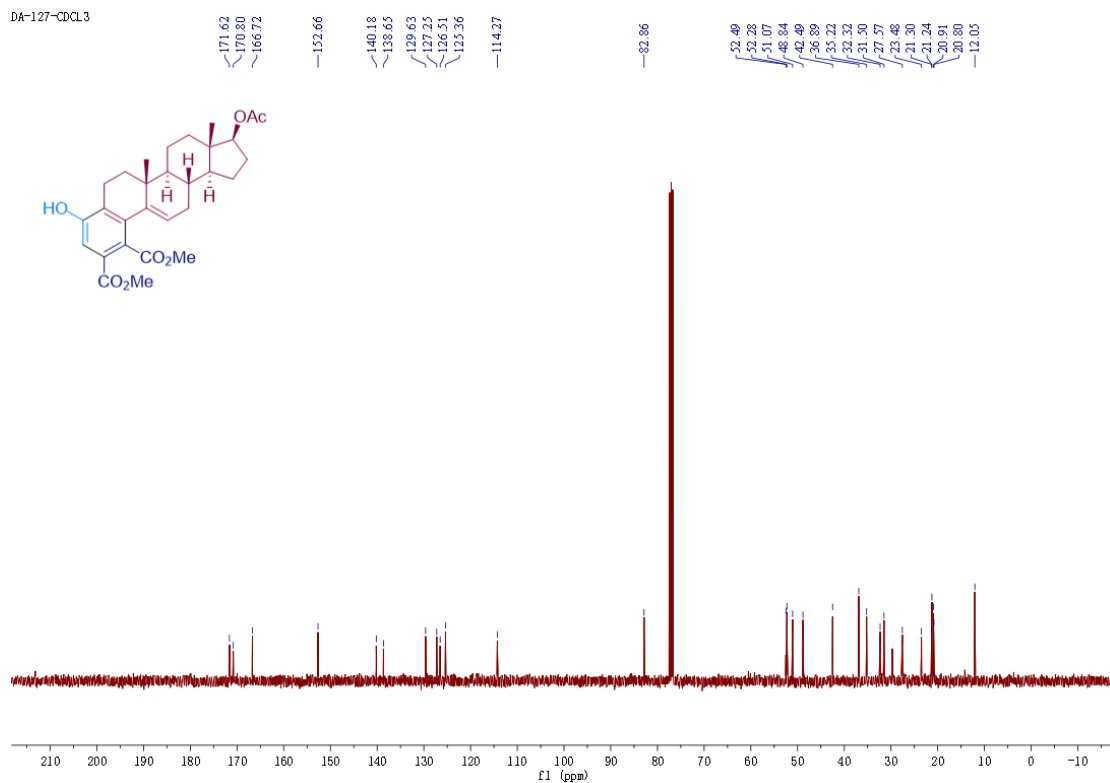

DA-164-H01

### <sup>1</sup>H NMR spectra of 11g (400 MHz, CDCl<sub>3</sub>)

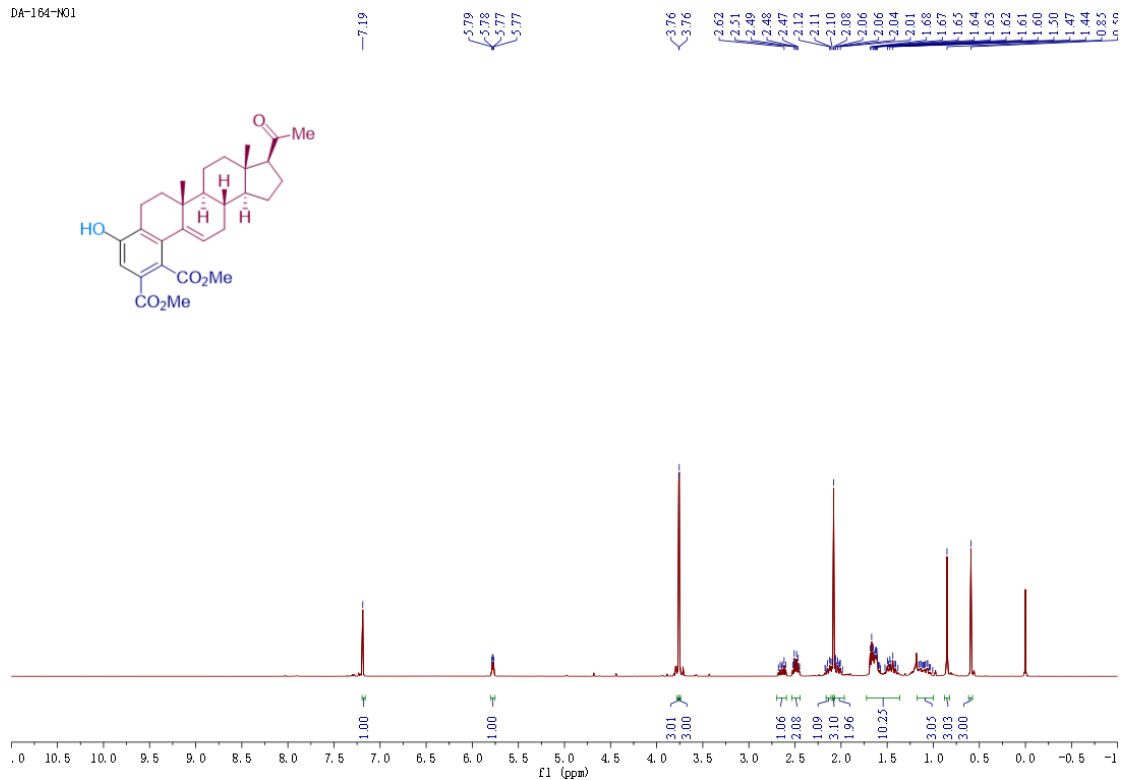

### <sup>13</sup>C NMR spectra of 11g (101 MHz, CDCl<sub>3</sub>)

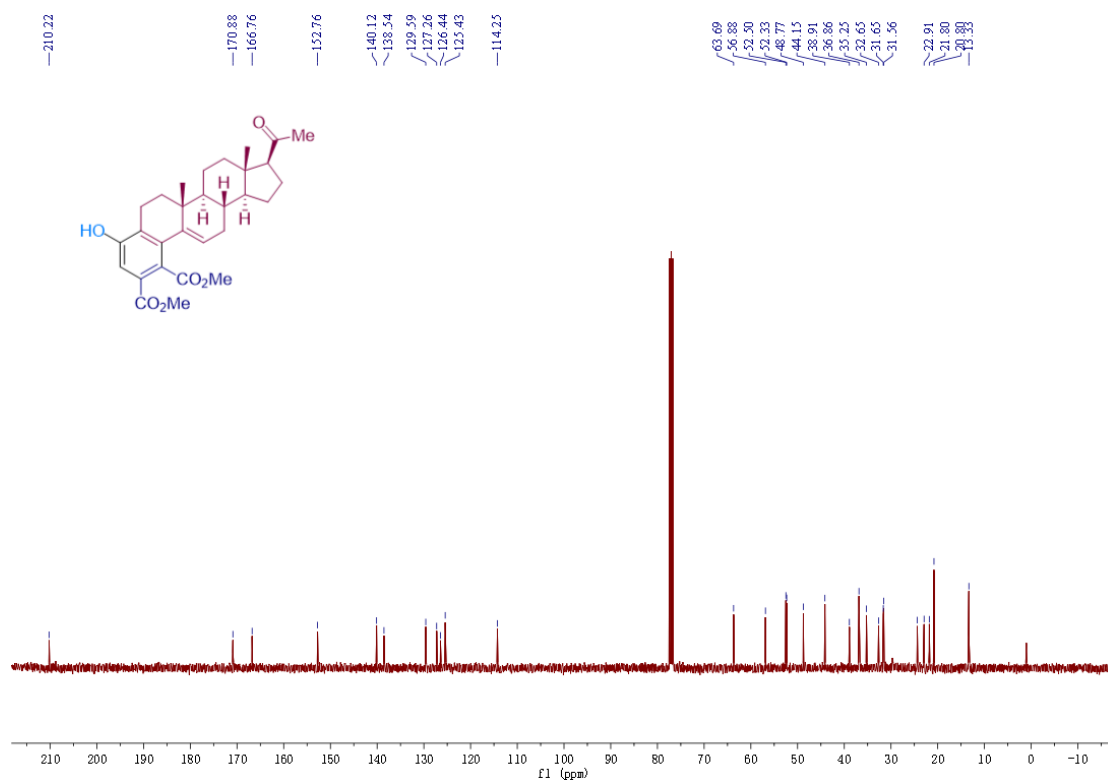

**<sup>1</sup>H NMR spectra of 11h (400 MHz, CDCl<sub>3</sub>)**

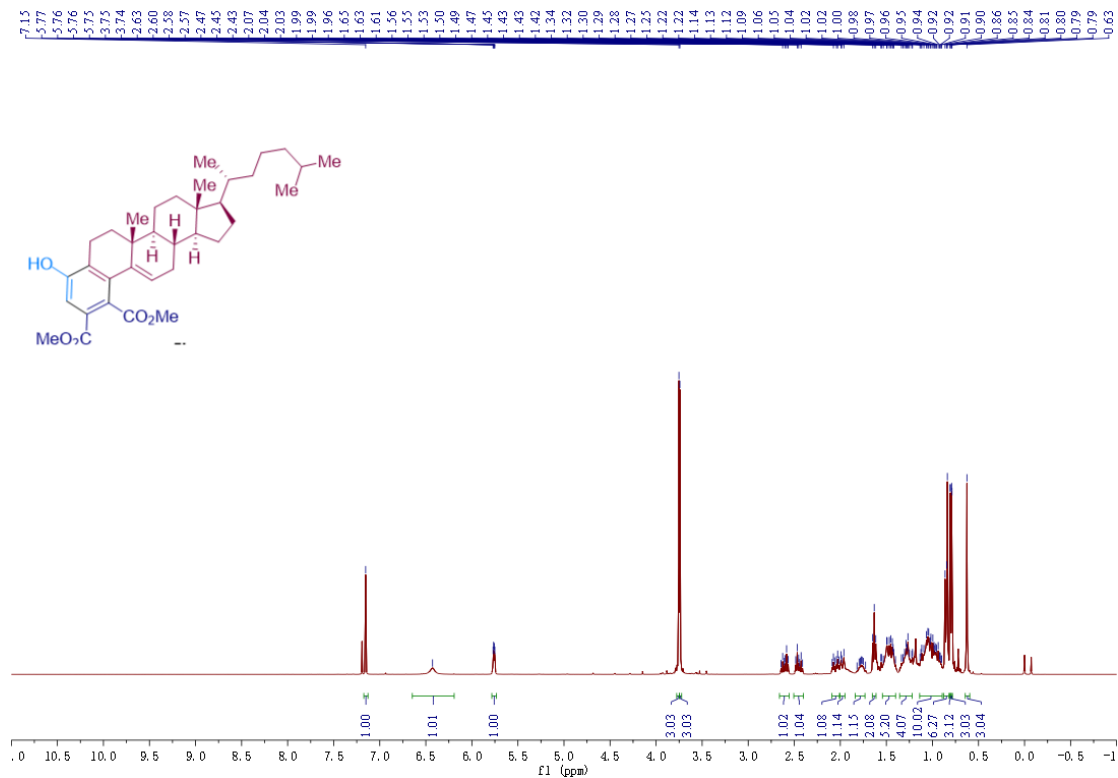

**<sup>13</sup>C NMR spectra of 11h (101 MHz, CDCl<sub>3</sub>)**

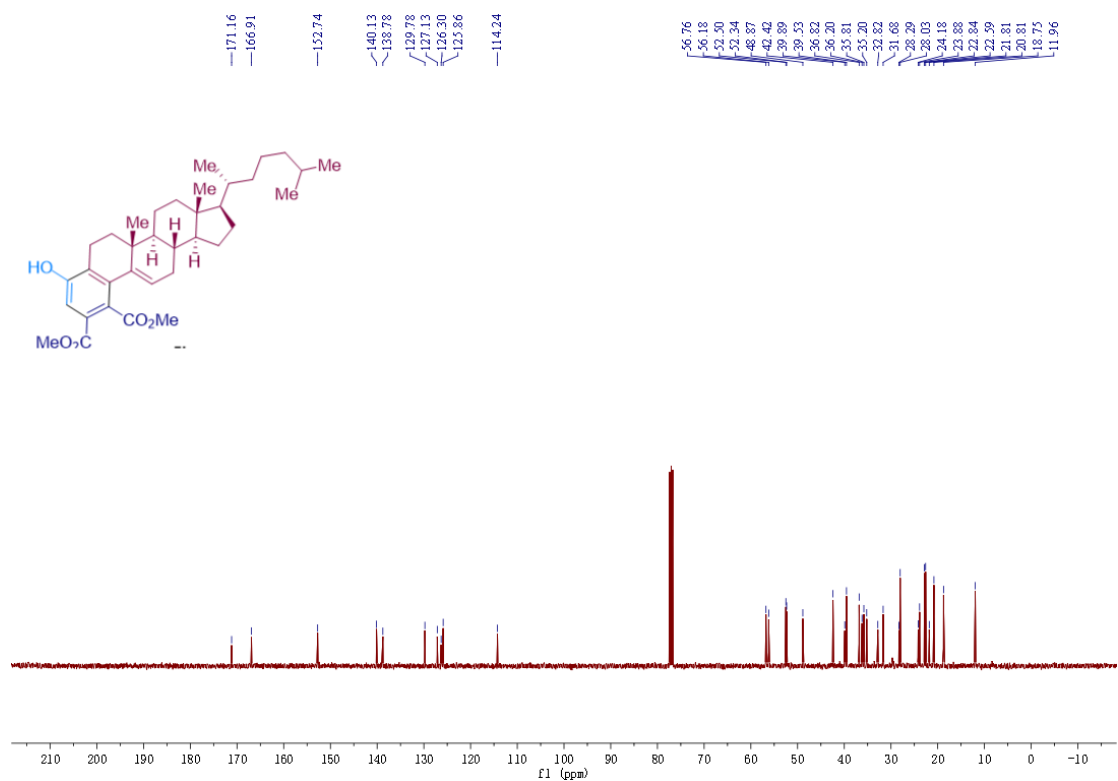

**<sup>1</sup>H NMR spectra of 11i (400 MHz, CDCl<sub>3</sub>)**

DA-165-CDCl<sub>3</sub>

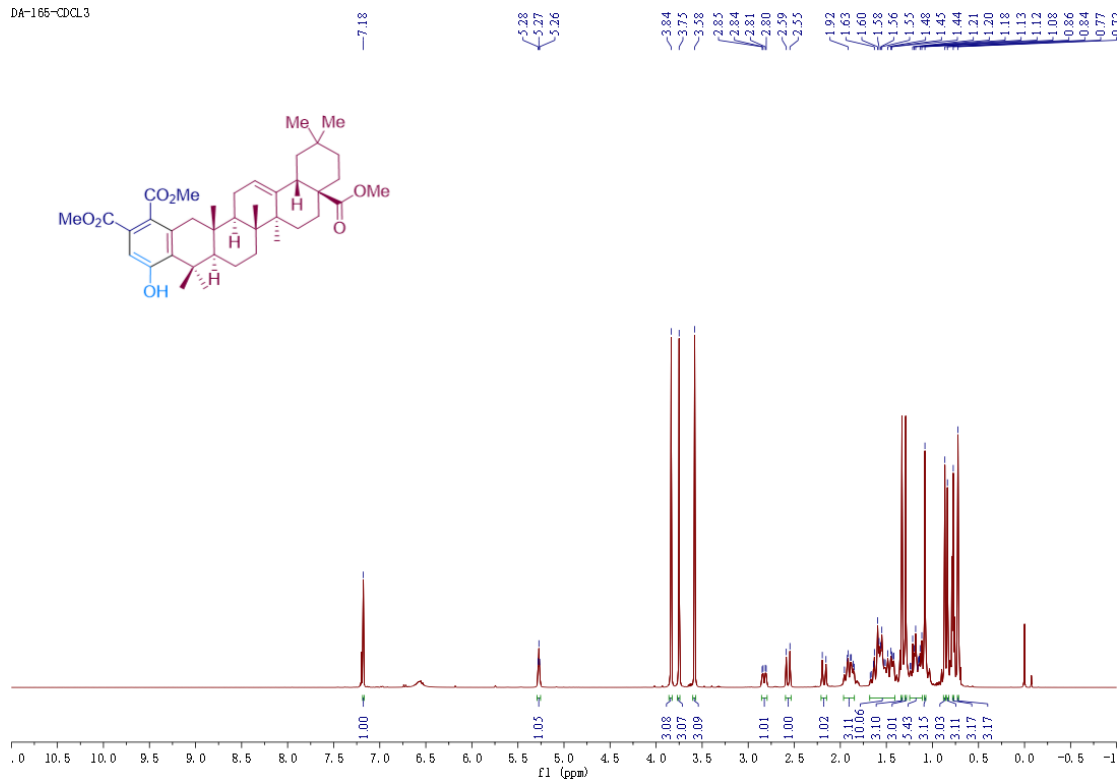

**<sup>13</sup>C NMR spectra of 11i (101 MHz, CDCl<sub>3</sub>)**

DA-130-CDCl<sub>3</sub>

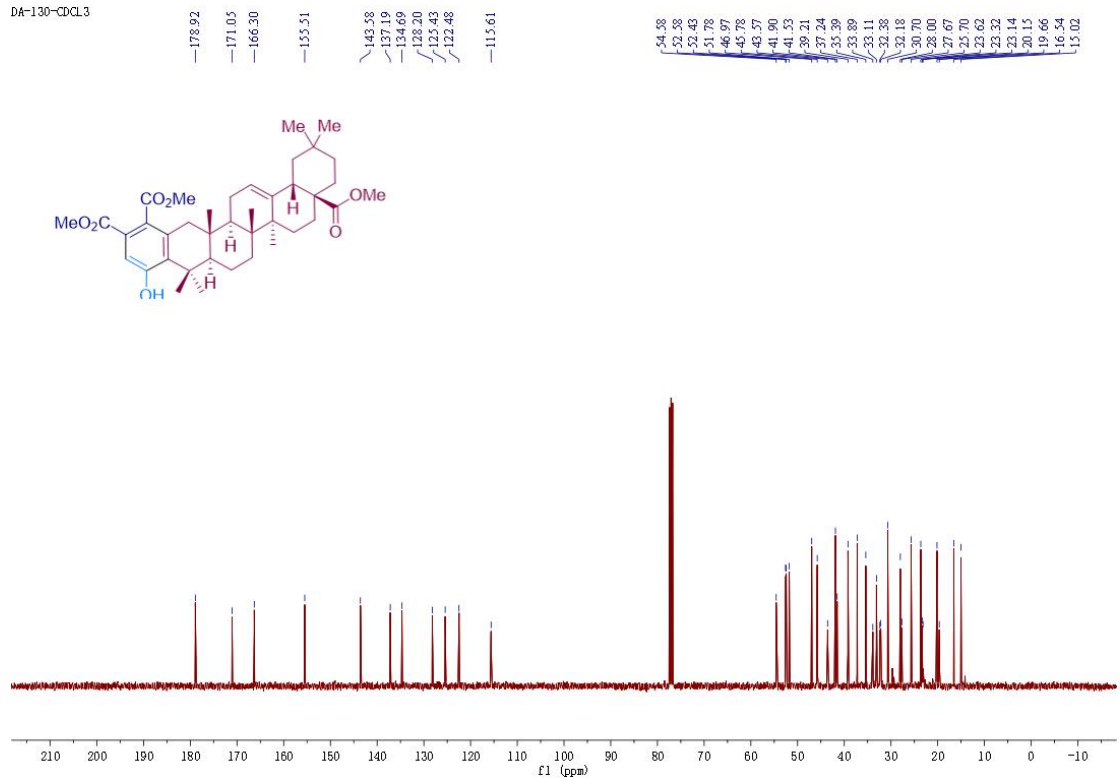

**<sup>1</sup>H NMR spectra of 11j (400 MHz, CDCl<sub>3</sub>)**

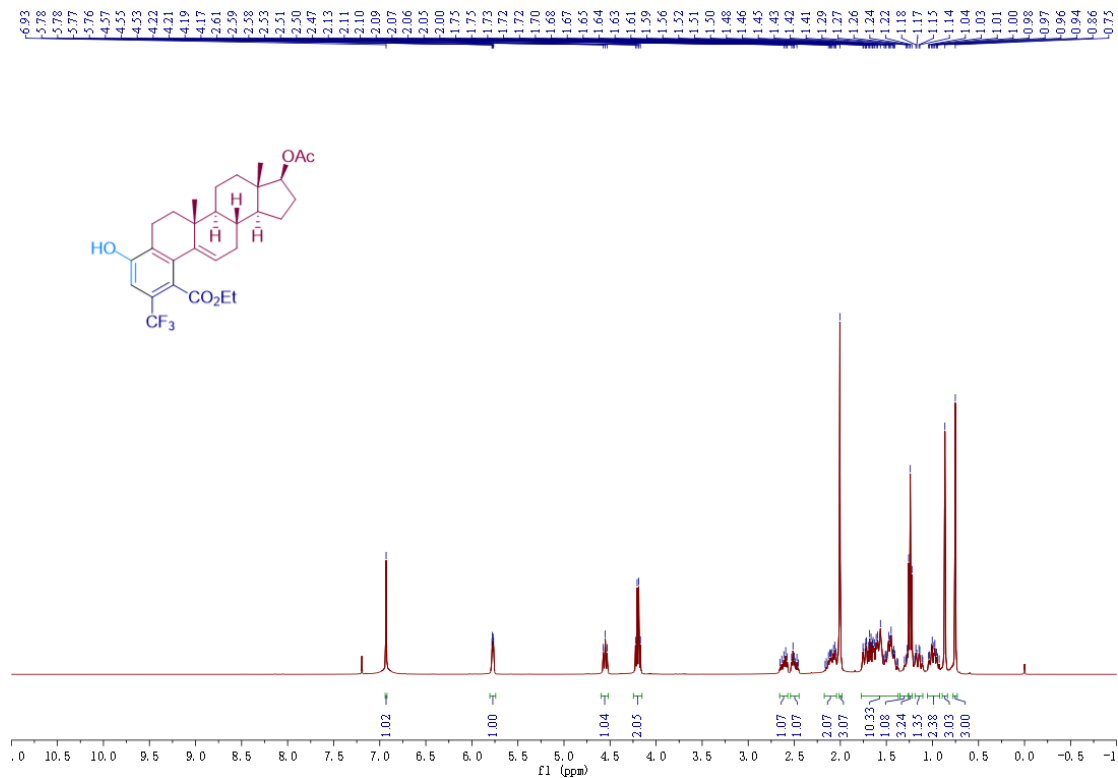

**<sup>13</sup>C NMR spectra of 11j (101 MHz, CDCl<sub>3</sub>)**

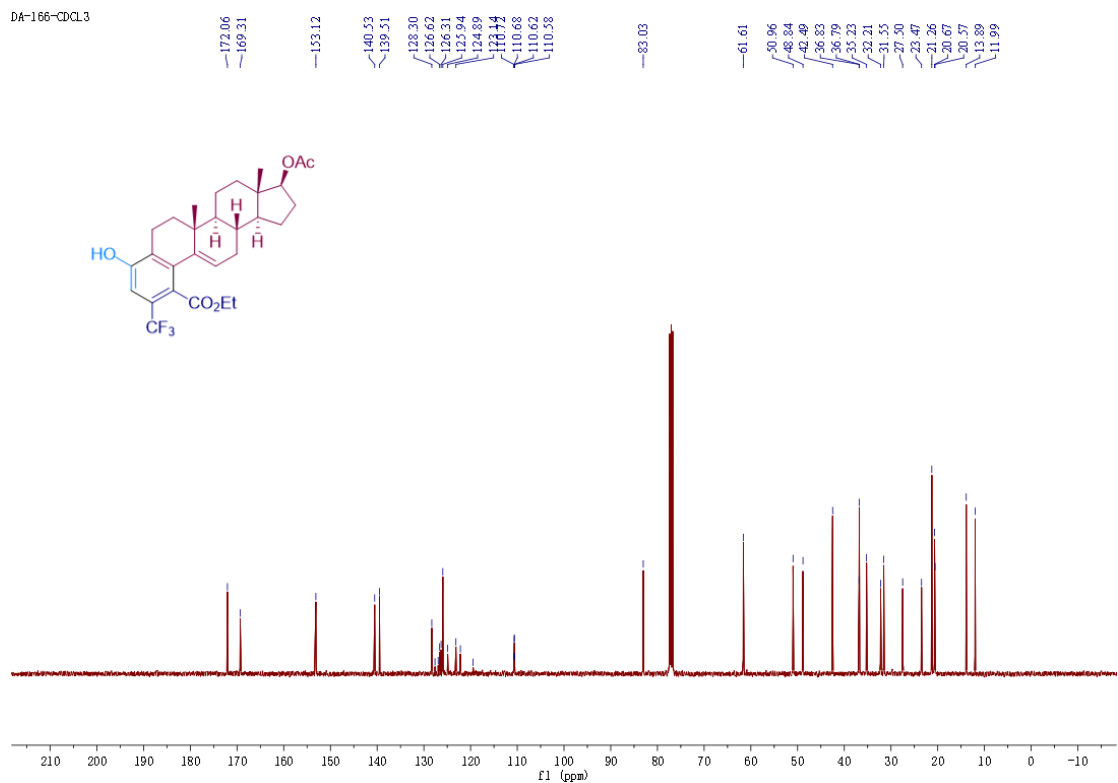

### $^{19}\text{F}$ NMR spectra of 11j (377 MHz, $\text{CDCl}_3$ )

DA-166- $\text{CDCl}_3$

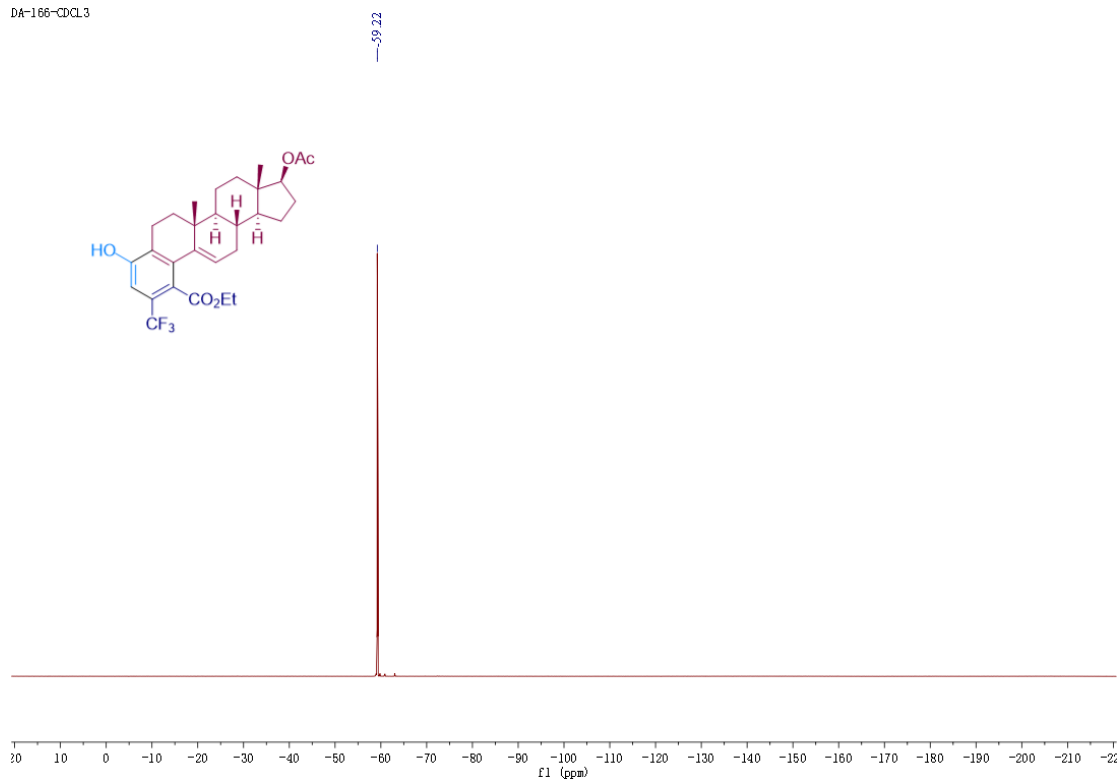

### $^1\text{H}$ NMR spectra of 11k (400 MHz, $(\text{CD}_3)_2\text{SO}$ )

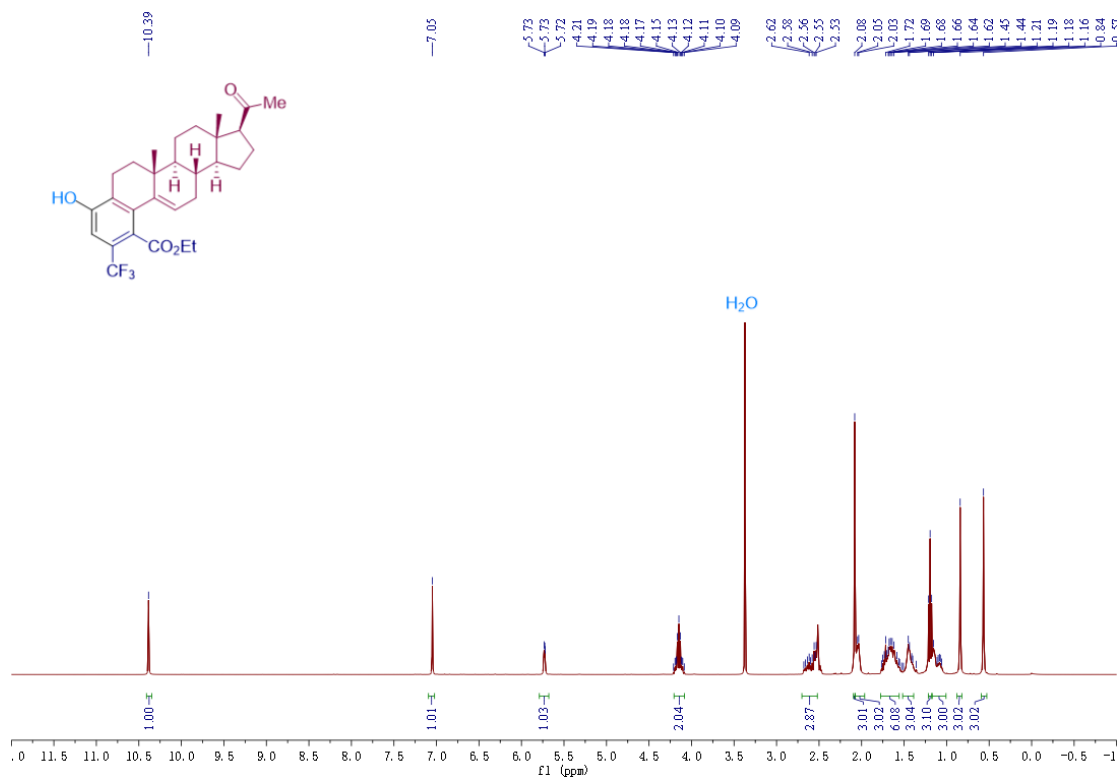

**<sup>13</sup>C NMR spectra of 11k (101 MHz, (CD<sub>3</sub>)<sub>2</sub>SO)**

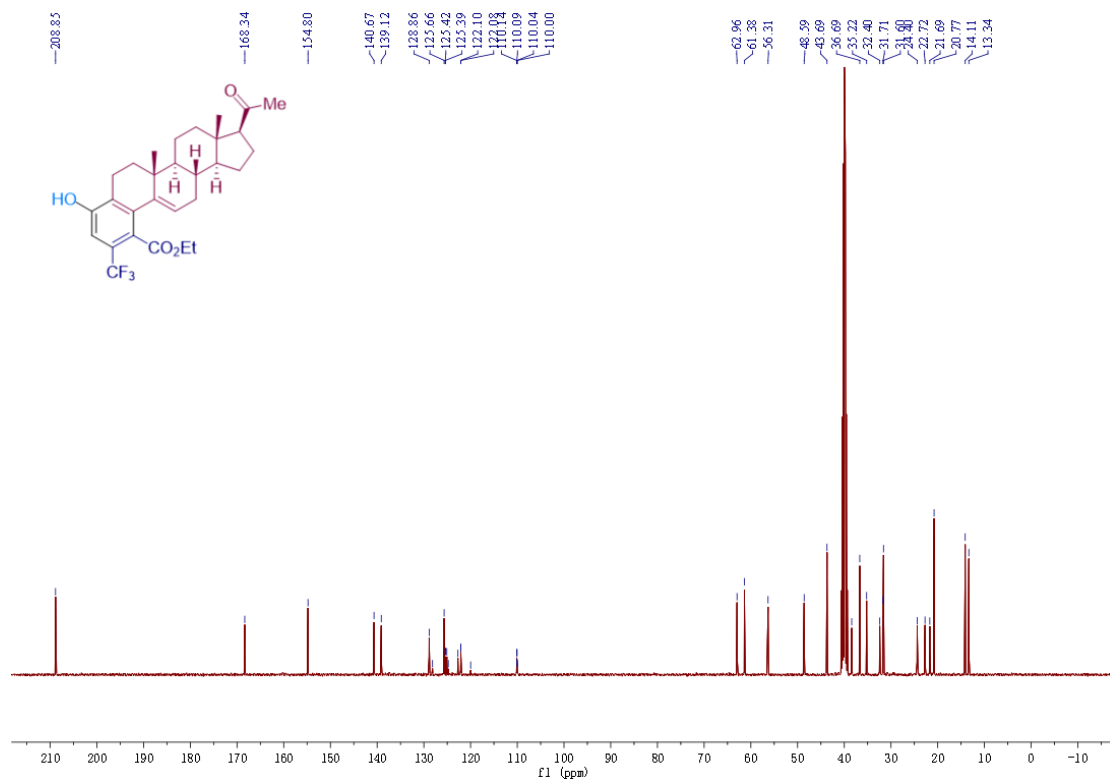

**<sup>19</sup>F NMR spectra of 11k (377 MHz, (CD<sub>3</sub>)<sub>2</sub>SO)**

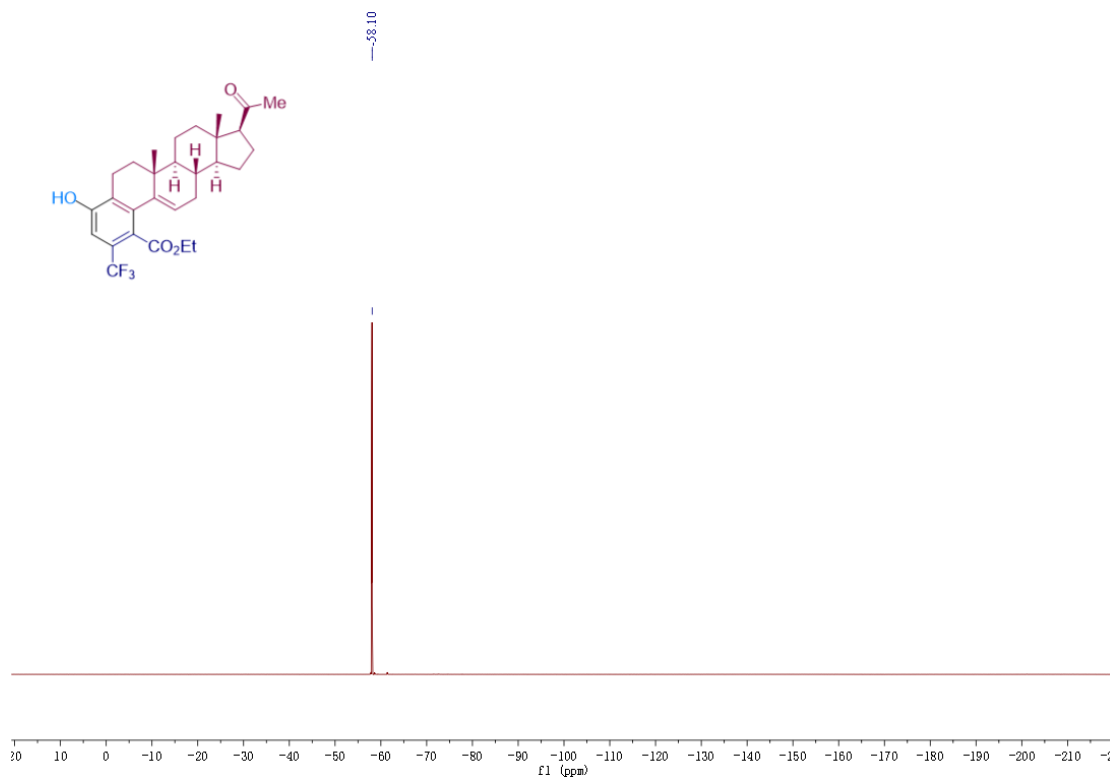

**<sup>1</sup>H NMR spectra of 111 (400 MHz, CDCl<sub>3</sub>)**

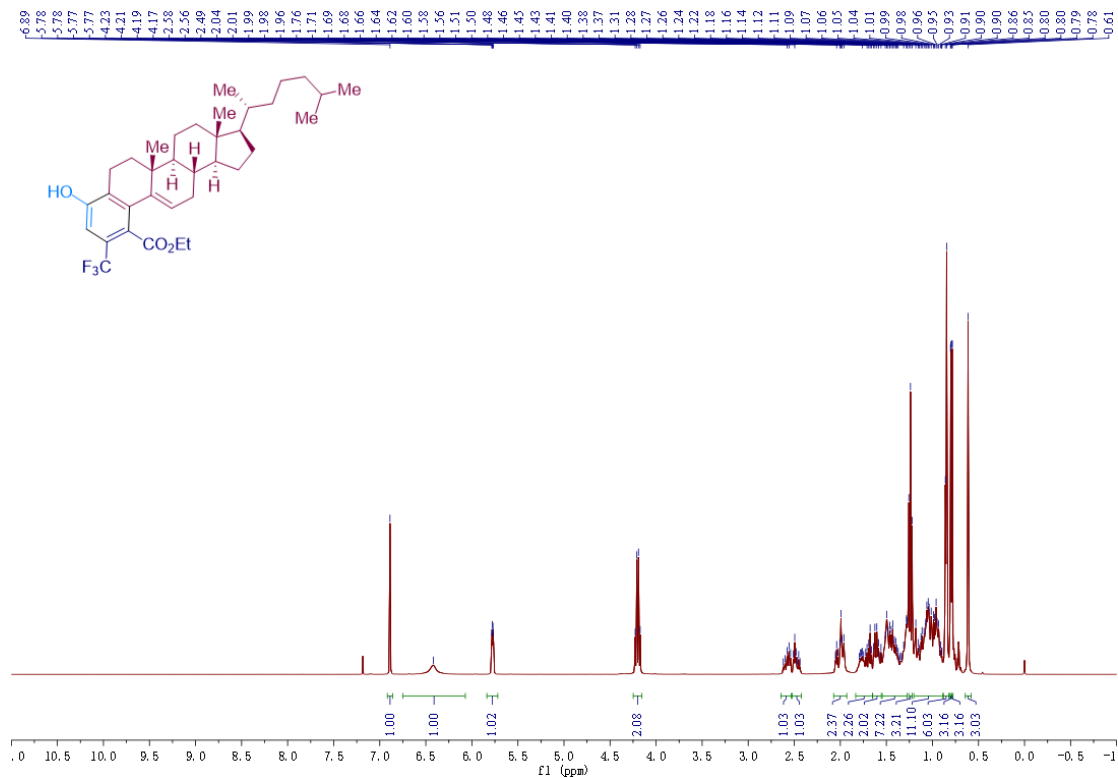

**<sup>13</sup>C NMR spectra of 111 (101 MHz, CDCl<sub>3</sub>)**

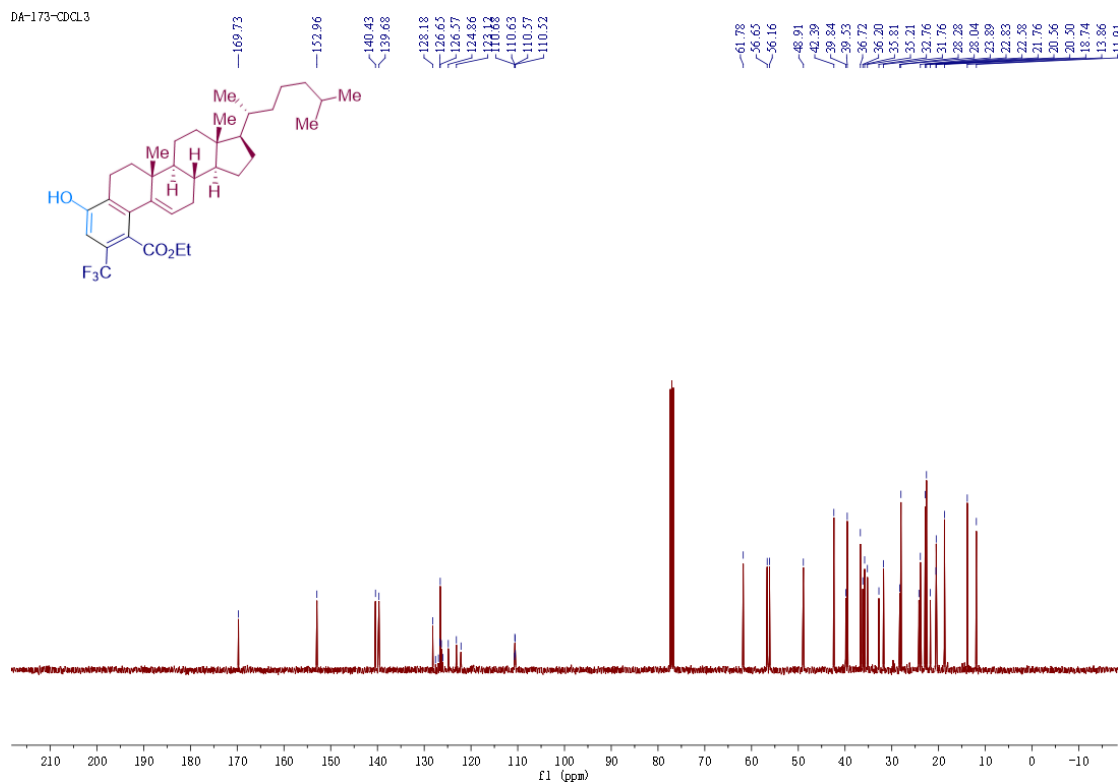



**<sup>19</sup>F NMR spectra of 111 (377 MHz, CDCl<sub>3</sub>)**

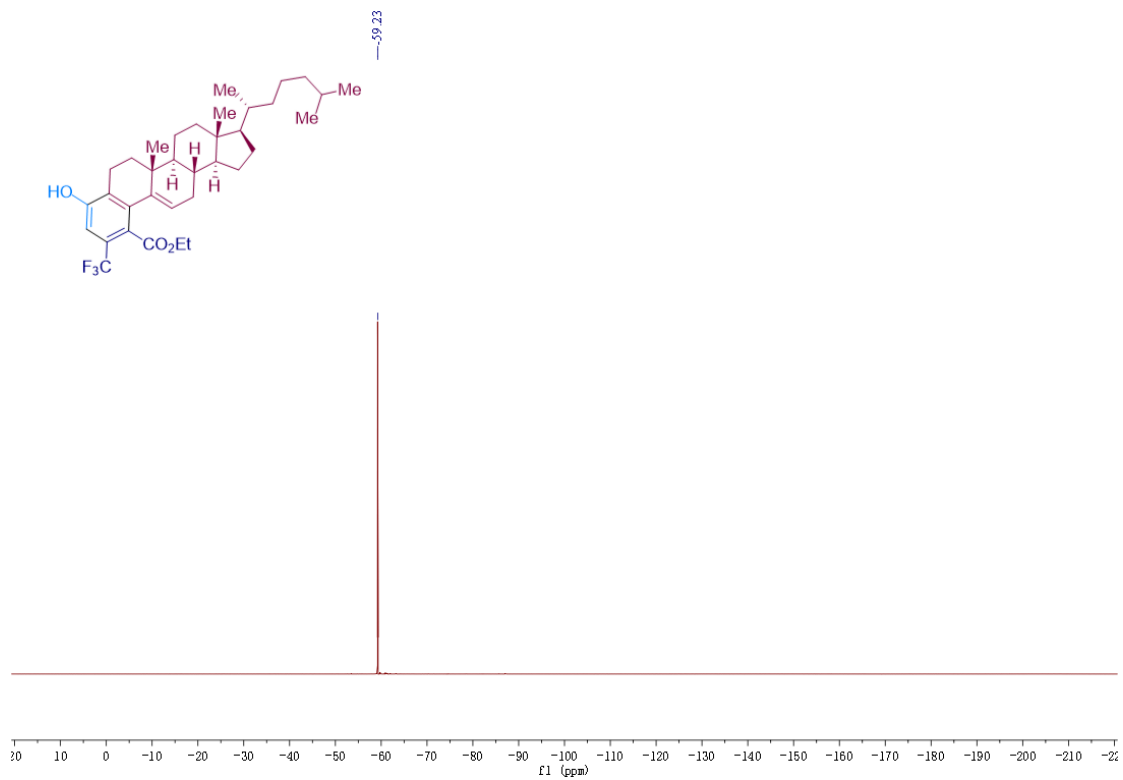

Supplement: d4qo01235f1.pdf [file d4qo01235f1.pdf]
